# Supplementary material
Source: HighWire-hosted journal article supplement (https://bmjopen.bmj.com/content/9/10/e030961)
Supplement: inline-supplementary-material-1 [file inline-supplementary-material-1.pdf]

# Surveys of PRIMA trial - version 83.01

Printed on 16-09-2019 11:34:13 by Liam Paget

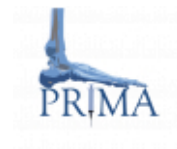

## Survey 'Vragenlijst PRIMA studie'

### Vragenlijst PRIMA studie - AOFAS - Pijn

| Number | Question                             | Answers                                                                                                                                                                                                         |
|--------|--------------------------------------|-----------------------------------------------------------------------------------------------------------------------------------------------------------------------------------------------------------------|
| 1.1    | Hoeveel pijn ervaart u aan uw voet?? | <input type="checkbox"/> Geen<br><input type="checkbox"/> Milde pijnklachten of af en toe pijn<br><input type="checkbox"/> Matige pijnklachten, dagelijks<br><input type="checkbox"/> Vrijwel continu erge pijn |

### Vragenlijst PRIMA studie - AOFAS resterende gedeelte

| Number | Question                                              | Answers                                                                                                                                                                                                                                                                                                                                                                                                                                              |
|--------|-------------------------------------------------------|------------------------------------------------------------------------------------------------------------------------------------------------------------------------------------------------------------------------------------------------------------------------------------------------------------------------------------------------------------------------------------------------------------------------------------------------------|
| 2.1    | Hoeveel beperkingen in het dagelijks leven ervaart u? | <input type="radio"/> Geen beperkingen, geen hulpmiddelen nodig<br><input type="radio"/> Geen beperkingen in algemeen dagelijkse bezigheden, wel beperkingen in recreatieve activiteiten (sport, hobbies, etc) geen ondersteuning<br><input type="radio"/> Beperkingen bij dagelijkse- en recreatieve activiteiten, stok<br><input type="radio"/> Ernstige beperkingen bij dagelijkse- en recreatieve activiteiten, walker, krukken, rolstoel, brace |
| 2.2    | Wat is de afstand die u in één keer kunt lopen?       | <input type="radio"/> Meer dan 600 meter<br><input type="radio"/> 400 - 600 meter<br><input type="radio"/> 100 - 300 meter<br><input type="radio"/> Minder dan 100 meter                                                                                                                                                                                                                                                                             |
| 2.3    | Heeft u moeite met lopen op een bepaalde ondergrond?  | <input type="radio"/> Geen problemen bij lopen<br><input type="radio"/> Enig problemen op ongelijke ondergrond, trap, helling, ladders<br><input type="radio"/> Ernstige problemen bij ongelijke ondergrond, trap, helling, ladders                                                                                                                                                                                                                  |

|     |                                                                                                                            |                                                                                                                                                                                                                                                                                                             |
|-----|----------------------------------------------------------------------------------------------------------------------------|-------------------------------------------------------------------------------------------------------------------------------------------------------------------------------------------------------------------------------------------------------------------------------------------------------------|
| 2.4 | Hoe zou u uw looppatroon beoordelen?                                                                                       | <input type="radio"/> Normaal of minimaal afwijkend<br><input type="radio"/> Duidelijk<br><input type="radio"/> Ernstig                                                                                                                                                                                     |
| 2.5 | Hoe zou u de beweeglijkheid van uw voet beoordelen ten opzichte van de andere zijde of ten opzichte van vóór het ongeval?  | <input type="radio"/> Hetzelfde of licht beperkt t.o.v. de niet aangedane zijde of zoals voor het ongeval<br><input type="radio"/> Ongeveer de helft beperkt<br><input type="radio"/> Sterk verminderd, bijna geen bewegingen mogelijk                                                                      |
| 2.6 | Hoe zou u de beweeglijkheid van uw enkel beoordelen ten opzichte van de andere zijde of ten opzichte van voor het ongeval? | <input type="radio"/> Hetzelfde of licht beperkt t.o.v. de niet aangedane zijde of zoals voor het ongeval<br><input type="radio"/> Ongeveer de helft beperkt<br><input type="radio"/> Sterk verminderd, bijna geen bewegingen mogelijk                                                                      |
| 2.7 | Hoe zou u de stabiliteit van uw voet en enkel beoordelen                                                                   | <input type="radio"/> Stabiel, ik verzwik mijn enkel hooguit incidenteel<br><input type="radio"/> Niet stabiel, ik verzwik mijn enkel vaak                                                                                                                                                                  |
| 2.8 | Hoe zou u de stand van uw voet beoordelen ten opzichte van de andere zijde of ten opzichte van voor het ongeval?           | <input type="radio"/> Goed, ik kan mijn voet goed plat op de grond zetten, waarbij de stand niet afwijkend is<br><input type="radio"/> Ik sta vrijwel alleen op de buitenzijde van mijn voet<br><input type="radio"/> Ik kan mijn voet niet plat op de grond zetten en loop vrijwel alleen op mijn voorvoet |

## Vragenlijst PRIMA studie - VAS Pain score

| Number | Question                                                                                                                                                             | Answers             |
|--------|----------------------------------------------------------------------------------------------------------------------------------------------------------------------|---------------------|
| 3.1    | VAS pijnscore (Geef uw minimaal pijnscore aan tijdens dagelijkse activiteiten op een schaal van 0 tot 100, waarbij 0 geen pijn is en 100 de ergste pijn denkbaar is) | (0.00) 100 (100.00) |

## Vragenlijst PRIMA studie - AAS

| Number | Question | Answers |
|--------|----------|---------|
|--------|----------|---------|

---

- 
- 4.1 Wat is het meest bij u van toepassing ten aanzien van uw activiteit?
- American Football
  - Basketbal
  - Gymnastiek/turnen
  - Handbal
  - Rugby
  - Voetbal
  - Hockey
  - Korfbal
  - Gevechtssporten: judo, karate, kung fu, taekwando, jiu jitsu, etc.
  - Oriëntatiewandelen
  - Rhythmische gymnastiek
  - Volleybal
  - Boxen
  - Freestyle snowboarden
  - Ijshockey
  - Tennis
  - Worstelen
  - Fitness, aerobics
  - Badminton
  - Baseball
  - Cross-country hardlopen
  - Moderne pentathlon
  - Squash
  - Surfen, windsurfen
  - Tafel tennis
  - Atletiek: spring-, werponderdelen
  - Waterskieuwen
  - Dans
  - Schermen
  - Zaalhockey
  - Bergbeklimmen
  - Langlauf
  - Parachute springen
  - Softball
  - Speciale beroepen en werkactiviteiten; speciale beroepen: ballet, professioneel soldaat, speciale reddingswerker, stuntman, etc.
  - Duiken
  - Scubaduiken
  - Skaten, in-line skaten
  - Atletiek: looponderdelen
  - Triatlon
  - Gewichtsheffen, body-building
-

- Alle competitieve sporten hieronder met 'seasonal' conditioning
- Zwaar fysiek werk
- Alpine skiën en snowboarden
- Bowlen/curlen
- Golf
- Mountainbike/BMX
- Powerliften
- Zeilen
- Fysiek werk
- Wielrennen
- Paardrijden
- Motorsporten/technische sporten
- Roeien, kayakken
- Boogschieten
- Water polo en zwemmen
- Kunnen lopen op oneven grond
- Geen sport, echter geen limitatie in dagelijkse activiteiten
- Kunnen lopen op even grond, maar de dagelijkse activiteiten zijn gelimiteerd
- Niet kunnen lopen, fysieke handicap wegens enkelproblemen

- 
- |       |                                                                                                                                                                               |                                                                                                              |
|-------|-------------------------------------------------------------------------------------------------------------------------------------------------------------------------------|--------------------------------------------------------------------------------------------------------------|
| 4.1.1 | <p><b><i>If 'Wat is het meest bij u van toepassing ten aanzien van uw activiteit?' is equal to 'American Football' answer this question:</i></b></p> <p>American Football</p> | <input type="radio"/> Professioneel<br><input type="radio"/> Competitief<br><input type="radio"/> Recreatief |
| <hr/> |                                                                                                                                                                               |                                                                                                              |
| 4.1.2 | <p><b><i>If 'Wat is het meest bij u van toepassing ten aanzien van uw activiteit?' is equal to 'Basketbal' answer this question:</i></b></p> <p>Basketbal</p>                 | <input type="radio"/> Professioneel<br><input type="radio"/> Competitief<br><input type="radio"/> Recreatief |
| <hr/> |                                                                                                                                                                               |                                                                                                              |
| 4.1.3 | <p><b><i>If 'Wat is het meest bij u van toepassing ten aanzien van uw activiteit?' is equal to 'Gymnastiek/turnen' answer this question:</i></b></p> <p>Gymnastiek/turnen</p> | <input type="radio"/> Professioneel<br><input type="radio"/> Competitief<br><input type="radio"/> Recreatief |
| <hr/> |                                                                                                                                                                               |                                                                                                              |
| 4.1.4 | <p><b><i>If 'Wat is het meest bij u van toepassing ten aanzien van uw activiteit?' is equal to 'Handbal' answer this question:</i></b></p> <p>Handbal</p>                     | <input type="radio"/> Professioneel<br><input type="radio"/> Competitief<br><input type="radio"/> Recreatief |
| <hr/> |                                                                                                                                                                               |                                                                                                              |
| 4.1.5 | <p><b><i>If 'Wat is het meest bij u van toepassing ten aanzien van uw activiteit?' is equal to 'Rugby' answer this question:</i></b></p> <p>Rugby</p>                         | <input type="radio"/> Professioneel<br><input type="radio"/> Competitief<br><input type="radio"/> Recreatief |

|        |                                                                                                                                                                                                                                                               |                                                                                                              |
|--------|---------------------------------------------------------------------------------------------------------------------------------------------------------------------------------------------------------------------------------------------------------------|--------------------------------------------------------------------------------------------------------------|
| 4.1.6  | <b>If 'Wat is het meest bij u van toepassing ten aanzien van uw acitviteit?' is equal to 'Voetbal' answer this question:</b><br>Voetbal                                                                                                                       | <input type="radio"/> Professioneel<br><input type="radio"/> Competitief<br><input type="radio"/> Recreatief |
| 4.1.7  | <b>If 'Wat is het meest bij u van toepassing ten aanzien van uw acitviteit?' is equal to 'Hockey' answer this question:</b><br>Hockey                                                                                                                         | <input type="radio"/> Professioneel<br><input type="radio"/> Competitief<br><input type="radio"/> Recreatief |
| 4.1.8  | <b>If 'Wat is het meest bij u van toepassing ten aanzien van uw acitviteit?' is equal to 'Korfbal' answer this question:</b><br>Korfbal                                                                                                                       | <input type="radio"/> Professioneel<br><input type="radio"/> Competitief<br><input type="radio"/> Recreatief |
| 4.1.9  | <b>If 'Wat is het meest bij u van toepassing ten aanzien van uw acitviteit?' is equal to 'Gevechtssporten: judo, karate, kung fu, taekwando, jiu jitsu, etc.' answer this question:</b><br>Gevechtssporten: judo, karate, kung fu, taekwando, jiu jitsu, etc. | <input type="radio"/> Professioneel<br><input type="radio"/> Competitief<br><input type="radio"/> Recreatief |
| 4.1.10 | <b>If 'Wat is het meest bij u van toepassing ten aanzien van uw acitviteit?' is equal to 'Oriëntatielopen' answer this question:</b><br>Oriëntatielopen                                                                                                       | <input type="radio"/> Professioneel<br><input type="radio"/> Competitief<br><input type="radio"/> Recreatief |
| 4.1.11 | <b>If 'Wat is het meest bij u van toepassing ten aanzien van uw acitviteit?' is equal to 'Rhythmische gymnastiek' answer this question:</b><br>Rhythmisch gymnastiek                                                                                          | <input type="radio"/> Professioneel<br><input type="radio"/> Competitief<br><input type="radio"/> Recreatief |
| 4.1.12 | <b>If 'Wat is het meest bij u van toepassing ten aanzien van uw acitviteit?' is equal to 'Volleybal' answer this question:</b><br>Volleybal                                                                                                                   | <input type="radio"/> Professioneel<br><input type="radio"/> Competitief<br><input type="radio"/> Recreatief |
| 4.1.13 | <b>If 'Wat is het meest bij u van toepassing ten aanzien van uw acitviteit?' is equal to 'Boxen' answer this question:</b><br>Boxen                                                                                                                           | <input type="radio"/> Professioneel<br><input type="radio"/> Competitief<br><input type="radio"/> Recreatief |
| 4.1.14 | <b>If 'Wat is het meest bij u van toepassing ten aanzien van uw acitviteit?' is equal to 'Freestyle snowboarden' answer this question:</b><br>Freestyle snowboarden                                                                                           | <input type="radio"/> Professioneel<br><input type="radio"/> Competitief<br><input type="radio"/> Recreatief |
| 4.1.15 | <b>If 'Wat is het meest bij u van toepassing ten aanzien van uw acitviteit?' is equal to 'Freestyle snowboarden' answer this question:</b><br>Ijshockey                                                                                                       | <input type="radio"/> Professioneel<br><input type="radio"/> Competitief<br><input type="radio"/> Recreatief |

|        |                                                                                                                                                                         |                                                                                                              |
|--------|-------------------------------------------------------------------------------------------------------------------------------------------------------------------------|--------------------------------------------------------------------------------------------------------------|
| 4.1.16 | <b>If 'Wat is het meest bij u van toepassing ten aanzien van uw acitviteit?' is equal to 'Tennis' answer this question:</b><br>Tennis                                   | <input type="radio"/> Professioneel<br><input type="radio"/> Competitief<br><input type="radio"/> Recreatief |
| 4.1.17 | <b>If 'Wat is het meest bij u van toepassing ten aanzien van uw acitviteit?' is equal to 'Worstelen' answer this question:</b><br>Worstelen                             | <input type="radio"/> Professioneel<br><input type="radio"/> Competitief<br><input type="radio"/> Recreatief |
| 4.1.18 | <b>If 'Wat is het meest bij u van toepassing ten aanzien van uw acitviteit?' is equal to 'Fitness, aerobics' answer this question:</b><br>Fitness, aerobics             | <input type="radio"/> Professioneel<br><input type="radio"/> Competitief<br><input type="radio"/> Recreatief |
| 4.1.19 | <b>If 'Wat is het meest bij u van toepassing ten aanzien van uw acitviteit?' is equal to 'Badminton' answer this question:</b><br>Badminton                             | <input type="radio"/> Professioneel<br><input type="radio"/> Competitief<br><input type="radio"/> Recreatief |
| 4.1.20 | <b>If 'Wat is het meest bij u van toepassing ten aanzien van uw acitviteit?' is equal to 'Baseball' answer this question:</b><br>Baseball                               | <input type="radio"/> Professioneel<br><input type="radio"/> Competitief<br><input type="radio"/> Recreatief |
| 4.1.21 | <b>If 'Wat is het meest bij u van toepassing ten aanzien van uw acitviteit?' is equal to 'Cross-country hardlopen' answer this question:</b><br>Cross-country hardlopen | <input type="radio"/> Professioneel<br><input type="radio"/> Competitief<br><input type="radio"/> Recreatief |
| 4.1.22 | <b>If 'Wat is het meest bij u van toepassing ten aanzien van uw acitviteit?' is equal to 'Moderne pentathlon' answer this question:</b><br>Moderne pentathlon           | <input type="radio"/> Professioneel<br><input type="radio"/> Competitief<br><input type="radio"/> Recreatief |
| 4.1.23 | <b>If 'Wat is het meest bij u van toepassing ten aanzien van uw acitviteit?' is equal to 'Squash' answer this question:</b><br>Squash                                   | <input type="radio"/> Professioneel<br><input type="radio"/> Competitief<br><input type="radio"/> Recreatief |
| 4.1.24 | <b>If 'Wat is het meest bij u van toepassing ten aanzien van uw acitviteit?' is equal to 'Surfen, windsurfen' answer this question:</b><br>Surfen, windsurfen           | <input type="radio"/> Professioneel<br><input type="radio"/> Competitief<br><input type="radio"/> Recreatief |
| 4.1.25 | <b>If 'Wat is het meest bij u van toepassing ten aanzien van uw acitviteit?' is equal to 'Tafel tennis' answer this question:</b><br>Tafel tennis                       | <input type="radio"/> Professioneel<br><input type="radio"/> Competitief<br><input type="radio"/> Recreatief |

|        |                                                                                                                                                                                             |                                                                                                              |
|--------|---------------------------------------------------------------------------------------------------------------------------------------------------------------------------------------------|--------------------------------------------------------------------------------------------------------------|
| 4.1.26 | <b>If 'Wat is het meest bij u van toepassing ten aanzien van uw acitviteit?' is equal to 'Atletiek: spring-, werponderdelen' answer this question:</b><br>Atletiek: spring-, werponderdelen | <input type="radio"/> Professioneel<br><input type="radio"/> Competitief<br><input type="radio"/> Recreatief |
| 4.1.27 | <b>If 'Wat is het meest bij u van toepassing ten aanzien van uw acitviteit?' is equal to 'Waterskieën' answer this question:</b><br>Waterskien                                              | <input type="radio"/> Professioneel<br><input type="radio"/> Competitief<br><input type="radio"/> Recreatief |
| 4.1.28 | <b>If 'Wat is het meest bij u van toepassing ten aanzien van uw acitviteit?' is equal to 'Dans' answer this question:</b><br>Dans                                                           | <input type="radio"/> Professioneel<br><input type="radio"/> Competitief<br><input type="radio"/> Recreatief |
| 4.1.29 | <b>If 'Wat is het meest bij u van toepassing ten aanzien van uw acitviteit?' is equal to 'Schermen' answer this question:</b><br>Schermen                                                   | <input type="radio"/> Professioneel<br><input type="radio"/> Competitief<br><input type="radio"/> Recreatief |
| 4.1.30 | <b>If 'Wat is het meest bij u van toepassing ten aanzien van uw acitviteit?' is equal to 'Zaalhockey' answer this question:</b><br>Zaalhockey                                               | <input type="radio"/> Professioneel<br><input type="radio"/> Competitief<br><input type="radio"/> Recreatief |
| 4.1.31 | <b>If 'Wat is het meest bij u van toepassing ten aanzien van uw acitviteit?' is equal to 'Bergbeklimmen' answer this question:</b><br>Bergbeklimmen                                         | <input type="radio"/> Professioneel<br><input type="radio"/> Competitief<br><input type="radio"/> Recreatief |
| 4.1.32 | <b>If 'Wat is het meest bij u van toepassing ten aanzien van uw acitviteit?' is equal to 'Langlauf' answer this question:</b><br>Langlauf                                                   | <input type="radio"/> Professioneel<br><input type="radio"/> Competitief<br><input type="radio"/> Recreatief |
| 4.1.33 | <b>If 'Wat is het meest bij u van toepassing ten aanzien van uw acitviteit?' is equal to 'Parachute springen' answer this question:</b><br>Parachute springen                               | <input type="radio"/> Professioneel<br><input type="radio"/> Competitief<br><input type="radio"/> Recreatief |
| 4.1.34 | <b>If 'Wat is het meest bij u van toepassing ten aanzien van uw acitviteit?' is equal to 'Softball' answer this question:</b><br>Softball                                                   | <input type="radio"/> Professioneel<br><input type="radio"/> Competitief<br><input type="radio"/> Recreatief |



|        |                                                                                                                                                                                                                                                                                                                                                                                          |                                                                                              |
|--------|------------------------------------------------------------------------------------------------------------------------------------------------------------------------------------------------------------------------------------------------------------------------------------------------------------------------------------------------------------------------------------------|----------------------------------------------------------------------------------------------|
| 4.1.35 | <b>If 'Wat is het meest bij u van toepassing ten aanzien van uw activiteit?' is equal to 'Speciale beroepen en werkactiviteiten; speciale beroepen: ballet, professioneel soldaat, speciale reddingswerker, stuntman, etc.' answer this question:</b><br>Speciale beroepen en werkactiviteiten speciale beroepen: ballet, professioneel soldaat, speciale reddingswerker, stuntman, etc. | <input type="radio"/> ballet, professioneel soldaat, speciale reddingswerker, stuntman, etc. |
| 4.1.36 | <b>If 'Wat is het meest bij u van toepassing ten aanzien van uw activiteit?' is equal to 'Duiken' answer this question:</b><br>Duiken                                                                                                                                                                                                                                                    | <input type="radio"/> Professioneel/competitief<br><input type="radio"/> Recreatief          |
| 4.1.37 | <b>If 'Wat is het meest bij u van toepassing ten aanzien van uw activiteit?' is equal to 'Scubaduiken' answer this question:</b><br>Scubaduiken                                                                                                                                                                                                                                          | <input type="radio"/> Professioneel/competitief<br><input type="radio"/> Recreatief          |
| 4.1.38 | <b>If 'Wat is het meest bij u van toepassing ten aanzien van uw activiteit?' is equal to 'Skaten, in-line skaten' answer this question:</b><br>skaten, in-linen skaten                                                                                                                                                                                                                   | <input type="radio"/> Professioneel/competitief<br><input type="radio"/> Recreatief          |
| 4.1.39 | <b>If 'Wat is het meest bij u van toepassing ten aanzien van uw activiteit?' is equal to 'Atletiek: looponderdelen' answer this question:</b><br>Atletiek: looponderdelen                                                                                                                                                                                                                | <input type="radio"/> Professioneel/competitief<br><input type="radio"/> Recreatief          |
| 4.1.40 | <b>If 'Wat is het meest bij u van toepassing ten aanzien van uw activiteit?' is equal to 'Triatlon' answer this question:</b><br>triatlon                                                                                                                                                                                                                                                | <input type="radio"/> Professioneel/competitief<br><input type="radio"/> Recreatief          |
| 4.1.41 | <b>If 'Wat is het meest bij u van toepassing ten aanzien van uw activiteit?' is equal to 'Gewichtsheffen, body-building' answer this question:</b><br>Gewichtsheffen, body-building                                                                                                                                                                                                      | <input type="radio"/> Professioneel/competitief<br><input type="radio"/> Recreatief          |
| 4.1.42 | <b>If 'Wat is het meest bij u van toepassing ten aanzien van uw activiteit?' is equal to 'Alle competitieve sporten hieronder met 'seasonal' conditioning' answer this question:</b><br>Alle competitieve sporten hieronder met 'seasonal' conditioning                                                                                                                                  | <input type="radio"/> Alle competitieve sporten hieronder met 'seasonal' conditioning        |
| 4.1.43 | <b>If 'Wat is het meest bij u van toepassing ten aanzien van uw activiteit?' is equal to 'Zwaar fysiek werk' answer this question:</b><br>Zwaar fysiek werk                                                                                                                                                                                                                              | <input type="radio"/> Alle competitieve sporten hieronder met 'seasonal' conditioning        |

|        |                                                                                                                                                                                         |                                                       |
|--------|-----------------------------------------------------------------------------------------------------------------------------------------------------------------------------------------|-------------------------------------------------------|
| 4.1.44 | <b>If 'Wat is het meest bij u van toepassing ten aanzien van uw activiteit?' is equal to 'Alpine skiën en snowboarden' answer this question:</b><br>Alpine skien en snowboarden         | <input type="radio"/> Alpine skien en snowboarden     |
| 4.1.45 | <b>If 'Wat is het meest bij u van toepassing ten aanzien van uw activiteit?' is equal to 'Bowlen/curlen' answer this question:</b><br>Bowlen/curlen                                     | <input type="radio"/> Bowlen/curlen                   |
| 4.1.46 | <b>If 'Wat is het meest bij u van toepassing ten aanzien van uw activiteit?' is equal to 'Golf' answer this question:</b><br>Golf                                                       | <input type="radio"/> Golf                            |
| 4.1.47 | <b>If 'Wat is het meest bij u van toepassing ten aanzien van uw activiteit?' is equal to 'Mountainbike/BMX' answer this question:</b><br>Mountainbike/BMX                               | <input type="radio"/> Mountainbike/BMX                |
| 4.1.48 | <b>If 'Wat is het meest bij u van toepassing ten aanzien van uw activiteit?' is equal to 'Powerliften' answer this question:</b><br>Powerliften                                         | <input type="radio"/> Powerliften                     |
| 4.1.49 | <b>If 'Wat is het meest bij u van toepassing ten aanzien van uw activiteit?' is equal to 'Zeilen' answer this question:</b><br>Zeilen                                                   | <input type="radio"/> Zeilen                          |
| 4.1.50 | <b>If 'Wat is het meest bij u van toepassing ten aanzien van uw activiteit?' is equal to 'Fysiek werk' answer this question:</b><br>Fysiek werk                                         | <input type="radio"/> Fysiek werk                     |
| 4.1.51 | <b>If 'Wat is het meest bij u van toepassing ten aanzien van uw activiteit?' is equal to 'Wielrennen' answer this question:</b><br>Wielrennen                                           | <input type="radio"/> Wielrennen                      |
| 4.1.52 | <b>If 'Wat is het meest bij u van toepassing ten aanzien van uw activiteit?' is equal to 'Paardrijden' answer this question:</b><br>Paardrijden                                         | <input type="radio"/> Paardrijden                     |
| 4.1.53 | <b>If 'Wat is het meest bij u van toepassing ten aanzien van uw activiteit?' is equal to 'Motorsporten/technische sporten' answer this question:</b><br>Motorsporten/technische sporten | <input type="radio"/> Motorsporten/technische sporten |
| 4.1.54 | <b>If 'Wat is het meest bij u van toepassing ten aanzien van uw activiteit?' is equal to 'Roeien, kayakken' answer this question:</b><br>Roeien, kayakken                               | <input type="radio"/> Roeien, kayakken                |

|        |                                                                                                                                                                                                                                                                                   |                                                                                                    |
|--------|-----------------------------------------------------------------------------------------------------------------------------------------------------------------------------------------------------------------------------------------------------------------------------------|----------------------------------------------------------------------------------------------------|
| 4.1.55 | <b>If 'Wat is het meest bij u van toepassing ten aanzien van uw activiteit?' is equal to 'Boogschieten' answer this question:</b><br>Boogschieten                                                                                                                                 | <input type="radio"/> Boogschieten                                                                 |
| 4.1.56 | <b>If 'Wat is het meest bij u van toepassing ten aanzien van uw activiteit?' is equal to 'Water polo en zwemmen' answer this question:</b><br>Water polo en zwemmen                                                                                                               | <input type="radio"/> Water polo en zwemmen                                                        |
| 4.1.57 | <b>If 'Wat is het meest bij u van toepassing ten aanzien van uw activiteit?' is equal to 'Kunnen lopen op oneven grond' answer this question:</b><br>Kunnen lopen op oneven grond                                                                                                 | <input type="radio"/> Kunnen lopen op oneven grond                                                 |
| 4.1.58 | <b>If 'Wat is het meest bij u van toepassing ten aanzien van uw activiteit?' is equal to 'Geen sport, echter geen limitatie in dagelijkse activiteiten' answer this question:</b><br>Geen sport, echter geen limitatie in dagelijkse activiteiten                                 | <input type="radio"/> Geen sport, echter geen limitatie in dagelijkse activiteiten                 |
| 4.1.59 | <b>If 'Wat is het meest bij u van toepassing ten aanzien van uw activiteit?' is equal to 'Kunnen lopen op even grond, maar de dagelijkse activiteiten zijn gelimiteerd' answer this question:</b><br>Kunnen lopen op even grond, maar de dagelijkse activiteiten zijn gelimiteerd | <input type="radio"/> Kunnen lopen op even grond, maar de dagelijkse activiteiten zijn gelimiteerd |
| 4.1.60 | <b>If 'Wat is het meest bij u van toepassing ten aanzien van uw activiteit?' is equal to 'Niet kunnen lopen, fysieke handicap wegens enkelproblemen' answer this question:</b><br>Niet kunnen lopen, fysieke handicap wegens enkelproblemen                                       | <input type="radio"/> Niet kunnen lopen, fysieke handicap wegens enkelproblemen                    |

## Vragenlijst PRIMA studie - Hoe tevreden bent u over de enkelklachten?

| Number | Question                                   | Answers                                                                                                                       |
|--------|--------------------------------------------|-------------------------------------------------------------------------------------------------------------------------------|
| 5.1    | Hoe tevreden bent u over de enkelklachten? | <input type="radio"/> Slecht<br><input type="radio"/> Matig<br><input type="radio"/> Goed<br><input type="radio"/> Uitstekend |

## Vragenlijst PRIMA studie - SF-36

| Number | Question                                                                                                                                                                                                                                                                                                                                                           | Answers                                                                                                                                                                                                                                                                                   |
|--------|--------------------------------------------------------------------------------------------------------------------------------------------------------------------------------------------------------------------------------------------------------------------------------------------------------------------------------------------------------------------|-------------------------------------------------------------------------------------------------------------------------------------------------------------------------------------------------------------------------------------------------------------------------------------------|
|        | Deze vragenlijst gaat over uw standpunten t.a.v. uw gezondheid. Met behulp van deze gegevens kan worden bijgehouden hoe u zich voelt en hoe goed u in staat bent uw gebruikelijke bezigheden uit te voeren. Beantwoord elke vraag door een antwoord aan te klikken. Als u niet zeker weet hoe u een vraag moet beantwoorden, geef dan het best mogelijke antwoord. |                                                                                                                                                                                                                                                                                           |
| 6.1    | Hoe zou u over het algemeen uw gezondheid noemen?                                                                                                                                                                                                                                                                                                                  | <input type="radio"/> Uitstekend <input type="radio"/> Zeer goed <input type="radio"/> Goed <input type="radio"/> Matig <input type="radio"/> Slecht                                                                                                                                      |
| 6.2    | Hoe beoordeelt u nu uw gezondheid over het algemeen vergeleken met een jaar geleden?                                                                                                                                                                                                                                                                               | <input type="radio"/> Veel beter dan een jaar geleden <input type="radio"/> Wat beter dan een jaar geleden <input type="radio"/> Ongeveer hetzelfde als een jaar geleden <input type="radio"/> Wat slechter dan een jaar geleden <input type="radio"/> Veel slechter dan een jaar geleden |
| 6.3    | Wordt u door uw gezondheid op dit moment beperkt bij forse inspanning, zoals hardlopen, tillen van zware voorwerpen of een veeleisende sport beoefenen?                                                                                                                                                                                                            | <input type="radio"/> Ja, ernstig beperkt <input type="radio"/> Ja, een beetje beperkt <input type="radio"/> Nee, helemaal niet beperkt                                                                                                                                                   |
| 6.4    | Wordt u door uw gezondheid op dit moment beperkt bij matige inspanning zoals een tafel verplaatsen, stofzuigen, zwemmen of fietsen?                                                                                                                                                                                                                                | <input type="radio"/> Ja, ernstig beperkt <input type="radio"/> Ja, een beetje beperkt <input type="radio"/> Nee, helemaal niet beperkt                                                                                                                                                   |
| 6.5    | Wordt u door uw gezondheid op dit moment beperkt bij boodschappen tillen of dragen?                                                                                                                                                                                                                                                                                | <input type="radio"/> Ja, ernstig beperkt <input type="radio"/> Ja, een beetje beperkt <input type="radio"/> Nee, helemaal niet beperkt                                                                                                                                                   |
| 6.6    | Wordt u door uw gezondheid op dit moment beperkt bij een paar trappen oplopen?                                                                                                                                                                                                                                                                                     | <input type="radio"/> Ja, ernstig beperkt <input type="radio"/> Ja, een beetje beperkt <input type="radio"/> Nee, helemaal niet beperkt                                                                                                                                                   |
| 6.7    | Wordt u door uw gezondheid op dit moment beperkt bij één trap oplopen?                                                                                                                                                                                                                                                                                             | <input type="radio"/> Ja, ernstig beperkt <input type="radio"/> Ja, een beetje beperkt <input type="radio"/> Nee, helemaal niet beperkt                                                                                                                                                   |
| 6.8    | Wordt u door uw gezondheid op dit moment beperkt bij bukken, knielen of hurken?                                                                                                                                                                                                                                                                                    | <input type="radio"/> Ja, ernstig beperkt <input type="radio"/> Ja, een beetje beperkt <input type="radio"/> Nee, helemaal niet beperkt                                                                                                                                                   |
| 6.9    | Wordt u door uw gezondheid op dit moment beperkt bij meer dan één kilometer lopen?                                                                                                                                                                                                                                                                                 | <input type="radio"/> Ja, ernstig beperkt <input type="radio"/> Ja, een beetje beperkt <input type="radio"/> Nee, helemaal niet beperkt                                                                                                                                                   |
| 6.10   | Wordt u door uw gezondheid op dit moment beperkt bij een paar honderd meter lopen?                                                                                                                                                                                                                                                                                 | <input type="radio"/> Ja, ernstig beperkt <input type="radio"/> Ja, een beetje beperkt <input type="radio"/> Nee, helemaal niet beperkt                                                                                                                                                   |

- 
- 6.11 Wordt u door uw gezondheid op dit moment beperkt bij ongeveer honderd meter lopen?  Ja, ernstig beperkt  Ja, een beetje beperkt  Nee, helemaal niet beperkt
- 
- 6.12 Wordt u door uw gezondheid op dit moment beperkt bij uzelf wassen of aankleden?  Ja, ernstig beperkt  Ja, een beetje beperkt  Nee, helemaal niet beperkt
- 
- 6.13 U besteedde in de afgelopen 4 weken minder tijd aan werk of andere bezigheden  Ja  Nee
- 
- 6.14 U heeft in de afgelopen 4 weken minder bereikt dan u zou willen  Ja  Nee
- 
- 6.15 U was in de afgelopen 4 weken beperkt in het soort werk of andere bezigheden.  Ja  Nee
- 
- 6.16 U had de afgelopen 4 weken moeite om uw werk of andere bezigheden uit te voeren (het kostte u bijvoorbeeld extra inspanning).  Ja  Nee
- 
- 6.17 U besteedde in de afgelopen 4 weken minder tijd aan werk of andere bezigheden ten gevolge van emotionele problemen  Ja  Nee
- 
- 6.18 U heeft in de afgelopen 4 weken minder bereikt dan u zou willen ten gevolge van emotionele problemen.  Ja  Nee
- 
- 6.19 U deed de afgelopen 4 weken uw werk of andere bezigheden niet zo zorgvuldig als gewoonlijk ten gevolge van emotionele problemen.  Ja  Nee
- 
- 6.20 In hoeverre hebben uw lichamelijke gezondheid of emotionele problemen u gedurende de afgelopen 4 weken gehinderd in uw normale omgang met familie, vrienden of burens, of bij activiteiten in groepsverband?  Helemaal niet  Enigszins  Nogal  Veel  Heel erg veel
- 
- 6.21 Hoeveel lichamelijke pijn heeft u de afgelopen 4 weken gehad?  Geen  Heel licht  Licht  Nogal  Ernstig  Heel ernstig
- 
- 6.22 In welke mate bent u de afgelopen 4 weken door de pijn gehinderd in uw normale werk (zowel werk buitenshuis als huishoudelijk werk)?  Helemaal niet  Een klein beetje  Nogal  Veel  Heel erg veel

---

6.23      Voelde u zich levenslustig?

Altijd  
 Meestal  
 Vaak  
 Soms  
 Zelden  
 Nooit

---

6.24      Was u erg zenuwachtig?

Altijd  
 Meestal  
 Vaak  
 Soms  
 Zelden  
 Nooit

---

6.25      Zat u zo in de put dat u niets kon?

Altijd  
 Meestal  
 Vaak  
 Soms  
 Zelden  
 Nooit

---

6.26      Voelde u zich rustig en tevreden?

Altijd  
 Meestal  
 Vaak  
 Soms  
 Zelden  
 Nooit

---

6.27      Had u veel energie?

Altijd  
 Meestal  
 Vaak  
 Soms  
 Zelden  
 Nooit

---

6.28      Voelde u zich somber en neerslachtig?

Altijd  
 Meestal  
 Vaak  
 Soms  
 Zelden  
 Nooit

- 
- 6.29      Voelde u zich uitgeput?
- Altijd  
 Meestal  
 Vaak  
 Soms  
 Zelden  
 Nooit
- 
- 6.30      Was u een gelukkig mens?
- Altijd  
 Meestal  
 Vaak  
 Soms  
 Zelden  
 Nooit
- 
- 6.31      Voelde u zich moe?
- Altijd  
 Meestal  
 Vaak  
 Soms  
 Zelden  
 Nooit
- 
- 6.32      Hoe vaak hebben uw lichamelijke gezondheid of emotionele problemen u gedurende de afgelopen 4 weken gehinderd bij uw sociale activiteiten (zoals vrienden of familie bezoeken etc.)?
- Altijd  
 Meestal  
 Soms  
 Zelden  
 Nooit
- 
- 6.33      Ik lijk wat gemakkelijker ziek te worden dan andere mensen
- Volkomen juist  
 Grotendeels juist  
 Weet ik niet  
 Grotendeels onjuist  
 Volkomen onjuist
- 
- 6.34      Ik ben even gezond als andere mensen die ik ken
- Volkomen juist  
 Grotendeels juist  
 Weet ik niet  
 Grotendeels onjuist  
 Volkomen onjuist

- |      |                                                    |                                                                                                                                                                                                              |
|------|----------------------------------------------------|--------------------------------------------------------------------------------------------------------------------------------------------------------------------------------------------------------------|
| 6.35 | Ik verwacht dat mijn gezondheid achteruit zal gaan | <input type="radio"/> Volkomen juist<br><input type="radio"/> Grotendeels juist<br><input type="radio"/> Weet ik niet<br><input type="radio"/> Grotendeels onjuist<br><input type="radio"/> Volkomen onjuist |
| 6.36 | Mijn gezondheid is uitstekend                      | <input type="radio"/> Volkomen juist<br><input type="radio"/> Grotendeels juist<br><input type="radio"/> Weet ik niet<br><input type="radio"/> Grotendeels onjuist<br><input type="radio"/> Volkomen onjuist |

## Vragenlijst PRIMA studie - EQ-5D-3L

| Number                                                                                                                                                                                                                                                                                                                                                                    | Question                                                                                                         | Answers                                                                                                                                                                                                                                                     |
|---------------------------------------------------------------------------------------------------------------------------------------------------------------------------------------------------------------------------------------------------------------------------------------------------------------------------------------------------------------------------|------------------------------------------------------------------------------------------------------------------|-------------------------------------------------------------------------------------------------------------------------------------------------------------------------------------------------------------------------------------------------------------|
| <p>Deze vragenlijst gaat over uw standpunten t.a.v. uw gezondheid. Met behulp van deze gegevens kan worden bijgehouden hoe u zich voelt en hoe goed u in staat bent uw gebruikelijke bezigheden uit te voeren. Beantwoord elke vraag door een antwoord aan te klikken. Als u niet zeker weet hoe u een vraag moet beantwoorden, geef dan het best mogelijke antwoord.</p> |                                                                                                                  |                                                                                                                                                                                                                                                             |
| 7.1                                                                                                                                                                                                                                                                                                                                                                       | Hoe is het met uw Mobiliteit gesteld?                                                                            | <input type="radio"/> Ik heb geen problemen met lopen<br><input type="radio"/> Ik heb enige problemen met lopen<br><input type="radio"/> Ik ben bedlegerig                                                                                                  |
| 7.2                                                                                                                                                                                                                                                                                                                                                                       | Hoe is het met uw Zelfzorg gesteld?                                                                              | <input type="radio"/> Ik heb geen problemen om mijzelf te wassen of aan te kleden<br><input type="radio"/> Ik heb enige problemen om mijzelf te wassen of aan te kleden<br><input type="radio"/> Ik ben niet in staat om mijzelf te wassen of aan te kleden |
| 7.3                                                                                                                                                                                                                                                                                                                                                                       | Hoe is het met de Dagelijkse activiteiten (werk, studie, huishouden, gezins- en vrijetijdsactiviteiten) gesteld? | <input type="radio"/> Ik heb geen problemen met mijn dagelijkse activiteiten<br><input type="radio"/> Ik heb enige problemen met mijn dagelijkse activiteiten<br><input type="radio"/> Ik ben niet in staat om mijn dagelijkse activiteiten uit te voeren   |



|     |                                          |                                                                                                                                                                                                |
|-----|------------------------------------------|------------------------------------------------------------------------------------------------------------------------------------------------------------------------------------------------|
| 7.4 | Hoe is het met de Pijn/klachten gesteld? | <input type="radio"/> Ik heb geen pijn of andere klachten<br><input type="radio"/> Ik heb matige pijn of andere klachten<br><input type="radio"/> Ik heb zeer ernstige pijn of andere klachten |
|-----|------------------------------------------|------------------------------------------------------------------------------------------------------------------------------------------------------------------------------------------------|

|     |                                     |                                                                                                                                                                   |
|-----|-------------------------------------|-------------------------------------------------------------------------------------------------------------------------------------------------------------------|
| 7.5 | Hoe is het met de Stemming gesteld? | <input type="radio"/> Ik ben niet angstig of somber<br><input type="radio"/> Ik ben matig angstig of somber<br><input type="radio"/> Ik ben erg angstig of somber |
|-----|-------------------------------------|-------------------------------------------------------------------------------------------------------------------------------------------------------------------|

We willen weten hoe goed of slecht uw gezondheid VANDAAG is. Deze meetschaal loopt van 0 tot 100: 100 staat voor de BESTE gezondheid die u zich kunt voorstellen - 0 staat voor de SLECHTSTE gezondheid die u zich kunt voorstellen

|     |                       |        |          |
|-----|-----------------------|--------|----------|
| 7.6 | Uw Gezondheid vandaag | (0.00) | (100.00) |
|-----|-----------------------|--------|----------|

## Vragenlijst PRIMA studie - AOS

| Number | Question                                                                                                                                                                                                                                                                                                                                                                                                      | Answers                                                                                            |          |
|--------|---------------------------------------------------------------------------------------------------------------------------------------------------------------------------------------------------------------------------------------------------------------------------------------------------------------------------------------------------------------------------------------------------------------|----------------------------------------------------------------------------------------------------|----------|
|        | Instructies: De lijn naast elke vraag staat voor hoeveel PIJN u heeft in verschillende situaties. De linker kant (0) is "geen pijn" en de rechter kant (100) is "ergste pijn denkbaar". Geef voor de onderstaande situaties op de lijn aan hoeveel PIJN u in de afgelopen week in de enkel had. Als een of meerdere van deze situaties niet van toepassing waren, dan kiest u de "niet van toepassing" optie. |                                                                                                    |          |
| 8.1    | Wat was de hoogte van de ergste pijn in de afgelopen week?                                                                                                                                                                                                                                                                                                                                                    | (0.00)                                                                                             | (100.00) |
| 8.2    | Heeft u pijn als u 's ochtends opstaat?                                                                                                                                                                                                                                                                                                                                                                       | <input type="radio"/> Ja<br><input type="radio"/> Nee<br><input type="radio"/> Niet van toepassing |          |
| 8.2.1  | <b>If 'Heeft u pijn als u 's ochtends opstaat?' is equal to 'Ja' answer this question:</b><br>Hoeveel pijn heeft u voordat u 's ochtends opstaat?                                                                                                                                                                                                                                                             | (0.00)                                                                                             | (100.00) |
| 8.3    | Heeft u pijn wanneer u op blote voeten loopt?                                                                                                                                                                                                                                                                                                                                                                 | <input type="radio"/> Ja<br><input type="radio"/> Nee<br><input type="radio"/> Niet van toepassing |          |
| 8.3.1  | <b>If 'Heeft u pijn wanneer u op blote voeten loopt?' is equal to 'Ja' answer this question:</b><br>Hoeveel pijn heeft u als u op blote voeten loopt?                                                                                                                                                                                                                                                         | (0.00)                                                                                             | (100.00) |

|       |                                                                                                                                                                                   |                                                                                                    |
|-------|-----------------------------------------------------------------------------------------------------------------------------------------------------------------------------------|----------------------------------------------------------------------------------------------------|
| 8.4   | Heeft u pijn wanneer u op blote voeten staat?                                                                                                                                     | <input type="radio"/> Ja<br><input type="radio"/> Nee<br><input type="radio"/> Niet van toepassing |
| 8.4.1 | <b>If 'Heeft u pijn wanneer u op blote voeten staat?' is equal to 'Ja' answer this question:</b><br>Hoeveel pijn heeft u als u op blote voeten staat?                             | (0.00) (100.00)                                                                                    |
| 8.5   | Heeft u pijn wanneer u met schoenen loopt?                                                                                                                                        | <input type="radio"/> Ja<br><input type="radio"/> Nee<br><input type="radio"/> Niet van toepassing |
| 8.5.1 | <b>If 'Heeft u pijn wanneer u met schoenen loopt?' is equal to 'Ja' answer this question:</b><br>Hoeveel pijn heeft u wanneer u met schoenen loopt?                               | (0.00) (100.00)                                                                                    |
| 8.6   | Heeft u pijn wanneer u met schoenen staat?                                                                                                                                        | <input type="radio"/> Ja<br><input type="radio"/> Nee<br><input type="radio"/> Niet van toepassing |
| 8.6.1 | <b>If 'Heeft u pijn wanneer u met schoenen staat?' is equal to 'Ja' answer this question:</b><br>Hoeveel pijn heeft u wanneer u met schoenen staat?                               | (0.00) (100.00)                                                                                    |
| 8.7   | Heeft u pijn wanneer u loopt met steunzolen of een brace?                                                                                                                         | <input type="radio"/> Ja<br><input type="radio"/> Nee<br><input type="radio"/> Niet van toepassing |
| 8.7.1 | <b>If 'Heeft u pijn wanneer u loopt met steunzolen of een brace?' is equal to 'Ja' answer this question:</b><br>Hoeveel pijn heeft u wanneer u loopt met steunzolen of een brace? | (0.00) (100.00)                                                                                    |
| 8.8   | Heeft u pijn wanneer u staat met steunzolen of een brace?                                                                                                                         | <input type="radio"/> Ja<br><input type="radio"/> Nee<br><input type="radio"/> Niet van toepassing |
| 8.8.1 | <b>If 'Heeft u pijn wanneer u staat met steunzolen of een brace?' is equal to 'Ja' answer this question:</b><br>Hoeveel pijn heeft u wanneer u staat met steunzolen of een brace? | (0.00) (100.00)                                                                                    |
| 8.9   | Heeft u pijn aan het einde van de dag?                                                                                                                                            | <input type="radio"/> Ja<br><input type="radio"/> Nee<br><input type="radio"/> Niet van toepassing |

|                                                                                                                                                                                                                                                                                                                                                                                                                                                      |                                                                                                                                                                           |                                                                                                    |          |
|------------------------------------------------------------------------------------------------------------------------------------------------------------------------------------------------------------------------------------------------------------------------------------------------------------------------------------------------------------------------------------------------------------------------------------------------------|---------------------------------------------------------------------------------------------------------------------------------------------------------------------------|----------------------------------------------------------------------------------------------------|----------|
| 8.9.1                                                                                                                                                                                                                                                                                                                                                                                                                                                | <b>If 'Heeft u pijn aan het einde van de dag?' is equal to 'Ja' answer this question:</b><br>Hoeveel pijn heeft u aan het einde van de dag?                               | (0.00)                                                                                             | (100.00) |
| <p>Instructies:De lijn naast elke vraag staat voor hoeveel MOEITE u heeft met verschillende activiteiten. De linker kant (0) is "Niet moeilijk" en de rechter kant (100) is "Te moeilijk, niet uitvoerbaar". Geef voor de onderstaande activiteiten op de lijn aan hoeveel MOEITE u in de afgelopen week door enkelklachten had met onderstaande activiteiten. Als een situatie niet van toepassing is, kies dan de optie "niet van toepassing".</p> |                                                                                                                                                                           |                                                                                                    |          |
| 8.10                                                                                                                                                                                                                                                                                                                                                                                                                                                 | Heeft u moeite met door het huis lopen?                                                                                                                                   | <input type="radio"/> Ja<br><input type="radio"/> Nee<br><input type="radio"/> Niet van toepassing |          |
| 8.10.1                                                                                                                                                                                                                                                                                                                                                                                                                                               | <b>If 'Heeft u moeite met door het huis lopen?' is equal to 'Ja' answer this question:</b><br>Hoeveel moeite heeft u met door het huis lopen?                             | (0.00)                                                                                             | (100.00) |
| 8.11                                                                                                                                                                                                                                                                                                                                                                                                                                                 | Heeft u moeite met buiten lopen op oneven ondergrond?                                                                                                                     | <input type="radio"/> Ja<br><input type="radio"/> Nee<br><input type="radio"/> Niet van toepassing |          |
| 8.11.1                                                                                                                                                                                                                                                                                                                                                                                                                                               | <b>If 'Heeft u moeite met buiten lopen op oneven ondergrond?' is equal to 'Ja' answer this question:</b><br>Hoeveel moeite heeft u met buiten lopen op oneven ondergrond? | (0.00)                                                                                             | (100.00) |
| 8.12                                                                                                                                                                                                                                                                                                                                                                                                                                                 | Heeft u moeite met een paar honderd meter lopen?                                                                                                                          | <input type="radio"/> Ja<br><input type="radio"/> Nee<br><input type="radio"/> Niet van toepassing |          |
| 8.12.1                                                                                                                                                                                                                                                                                                                                                                                                                                               | <b>If 'Heeft u moeite met een paar honderd meter lopen?' is equal to 'Ja' answer this question:</b><br>Hoeveel moeite heeft u met een paar honderd meter lopen?           | (0.00)                                                                                             | (100.00) |
| 8.13                                                                                                                                                                                                                                                                                                                                                                                                                                                 | Heeft u moeite met een trap oplopen?                                                                                                                                      | <input type="radio"/> Ja<br><input type="radio"/> Nee<br><input type="radio"/> Niet van toepassing |          |
| 8.13.1                                                                                                                                                                                                                                                                                                                                                                                                                                               | <b>If 'Heeft u moeite met een trap oplopen?' is equal to 'Ja' answer this question:</b><br>Hoeveel moeite heeft u met een trap oplopen?                                   | (0.00)                                                                                             | (100.00) |
| 8.14                                                                                                                                                                                                                                                                                                                                                                                                                                                 | Heeft u moeite met een trap aflopen?                                                                                                                                      | <input type="radio"/> Ja<br><input type="radio"/> Nee<br><input type="radio"/> Niet van toepassing |          |

|        |                                                                                                                                                                                 |                                                                                                    |          |
|--------|---------------------------------------------------------------------------------------------------------------------------------------------------------------------------------|----------------------------------------------------------------------------------------------------|----------|
| 8.14.1 | <b>If 'Heeft u moeite met een trap aflopen?' is equal to 'Ja' answer this question:</b><br>Hoeveel moeite heeft u met een trap aflopen?                                         | (0.00)                                                                                             | (100.00) |
| 8.15   | Heeft u moeite met op de tenen staan?                                                                                                                                           | <input type="radio"/> Ja<br><input type="radio"/> Nee<br><input type="radio"/> Niet van toepassing |          |
| 8.15.1 | <b>If 'Heeft u moeite met op de tenen staan?' is equal to 'Ja' answer this question:</b><br>Hoeveel moeite heeft u met op de tenen staan?                                       | (0.00)                                                                                             | (100.00) |
| 8.16   | Heeft u moeite met opstaan uit de stoel?                                                                                                                                        | <input type="radio"/> Ja<br><input type="radio"/> Nee<br><input type="radio"/> Niet van toepassing |          |
| 8.16.1 | <b>If 'Heeft u moeite met opstaan uit de stoel?' is equal to 'Ja' answer this question:</b><br>Hoeveel moeite heeft u met opstaan uit de stoel?                                 | (0.00)                                                                                             | (100.00) |
| 8.17   | Heeft u moeite met het op- of afstappen van stoepranden?                                                                                                                        | <input type="radio"/> Ja<br><input type="radio"/> Nee<br><input type="radio"/> Niet van toepassing |          |
| 8.17.1 | <b>If 'Heeft u moeite met het op- of afstappen van stoepranden?' is equal to 'Ja' answer this question:</b><br>Hoeveel moeite heeft u met het op- of afstappen van stoepranden? | (0.00)                                                                                             | (100.00) |
| 8.18   | Heeft u moeite met snel lopen of rennen?                                                                                                                                        | <input type="radio"/> Ja<br><input type="radio"/> Nee<br><input type="radio"/> Niet van toepassing |          |
| 8.18.1 | <b>If 'Heeft u moeite met snel lopen of rennen?' is equal to 'Ja' answer this question:</b><br>Hoeveel moeite heeft u met snel lopen of rennen?                                 | (0.00)                                                                                             | (100.00) |

## Vragenlijst PRIMA studie - FAOS

| Number | Question | Answers |
|--------|----------|---------|
|--------|----------|---------|

Deze lijst vraagt naar uw mening over uw voet/enkel. Uw antwoorden geven ons een beeld van uw voet/enkel klachten en hoe u in staat bent om alledaagse activiteiten uit te voeren in uw huidige situatie. Beantwoorden van een vraag doet u door het aanklikken van een vakje met het volgens u meest juiste antwoord (één vakje per vraag). Als u niet zeker weet hoe u een vraag moet beantwoorden, geeft u dan het antwoord dat volgens u het meest op uw situatie van toepassing is. Deze vraag heeft betrekking op het voorkomen van voet/enkel klachten in de afgelopen week.

- |      |                                                                                                             |                                                                                                                                                            |
|------|-------------------------------------------------------------------------------------------------------------|------------------------------------------------------------------------------------------------------------------------------------------------------------|
| 9.1  | Is uw voet/enkel gezwollen?                                                                                 | <input type="radio"/> Nooit <input type="radio"/> Zelden <input type="radio"/> Soms <input type="radio"/> Vaak <input type="radio"/> Altijd                |
| 9.2  | Voelt u gekraak of hoort u klikken of een ander vreemd geluid wanneer u de voet/enkel beweegt?              | <input type="radio"/> Nooit <input type="radio"/> Zelden <input type="radio"/> Soms <input type="radio"/> Vaak <input type="radio"/> Altijd                |
| 9.3  | Hapert uw enkel of blokkeert uw enkel ('op slot' gaan zitten) wanneer u deze beweegt?                       | <input type="radio"/> Nooit <input type="radio"/> Zelden <input type="radio"/> Soms <input type="radio"/> Vaak <input type="radio"/> Altijd                |
| 9.4  | Kunt u de voet/enkel volledig strekken?                                                                     | <input type="radio"/> Altijd <input type="radio"/> Vaak <input type="radio"/> Soms <input type="radio"/> Zelden <input type="radio"/> Nooit                |
| 9.5  | Kunt u de voet volledig naar u toe buigen?                                                                  | <input type="radio"/> Altijd <input type="radio"/> Vaak <input type="radio"/> Soms <input type="radio"/> Zelden <input type="radio"/> Nooit                |
| 9.6  | In welke mate heeft u een stijf gevoel in de voet/enkel 's ochtends bij het wakker worden?                  | <input type="radio"/> Niet Ernstig <input type="radio"/> Mild <input type="radio"/> Matig <input type="radio"/> Zeer ernstig                               |
| 9.7  | In welke mate heeft u een stijf gevoel in de voet/enkel na zitten, liggen of rusten later op de dag?        | <input type="radio"/> Niet Ernstig <input type="radio"/> Mild <input type="radio"/> Matig <input type="radio"/> Zeer ernstig                               |
| 9.8  | Hoe vaak heeft u pijn in uw voet/enkel?                                                                     | <input type="radio"/> Nooit <input type="radio"/> Maandelijks <input type="radio"/> Wekelijks <input type="radio"/> Dagelijks <input type="radio"/> Altijd |
| 9.9  | Hoeveel voet/enkel pijn heeft u gehad in de afgelopen week bij draaien als uw voet/enkel op de grond staat? | <input type="radio"/> Geen <input type="radio"/> Mild <input type="radio"/> Matig <input type="radio"/> Ernstig <input type="radio"/> Zeer ernstig         |
| 9.10 | Hoeveel voet/enkel pijn heeft u gehad in de afgelopen week bij het volledig uitstrekken van de voet/enkel?  | <input type="radio"/> Geen <input type="radio"/> Mild <input type="radio"/> Matig <input type="radio"/> Ernstig <input type="radio"/> Zeer ernstig         |

- 
- 9.11 Hoeveel voet/enkel pijn heeft u gehad in de afgelopen week bij het volledig naar u toe buigen/optrekken van de voet/enkel
- Geen  
 Mild  
 Matig  
 Ernstig  
 Zeer ernstig
- 
- 9.12 Hoeveel voet/enkel pijn heeft u gehad in de afgelopen week bij het lopen op een vlakke ondergrond
- Geen  
 Mild  
 Matig  
 Ernstig  
 Zeer ernstig
- 
- 9.13 Hoeveel voet/enkel pijn heeft u gehad in de afgelopen week bij het trap op- en trap af lopen?
- Geen  
 Mild  
 Matig  
 Ernstig  
 Zeer ernstig
- 
- 9.14 Hoeveel voet/enkel pijn heeft u gehad in de afgelopen week 's nachts in bed?
- Geen  
 Mild  
 Matig  
 Ernstig  
 Zeer ernstig
- 
- 9.15 Hoeveel voet/enkel pijn heeft u gehad in de afgelopen week bij het zitten of liggen?
- Geen  
 Mild  
 Matig  
 Ernstig  
 Zeer ernstig
- 
- 9.16 Hoeveel voet/enkel pijn heeft u gehad in de afgelopen week bij het rechtop staan?
- Geen  
 Mild  
 Matig  
 Ernstig  
 Zeer ernstig
- 
- 9.17 In welke mate werd u gehinderd bij het trap aflopen?
- Niet  Mild  Matig   
Ernstig  Zeer ernstig
- 
- 9.18 In welke mate werd u gehinderd bij het trap op lopen?
- Niet  Mild  Matig   
Ernstig  Zeer ernstig

|      |                                                                                                                        |                                       |                                                                  |                             |                       |
|------|------------------------------------------------------------------------------------------------------------------------|---------------------------------------|------------------------------------------------------------------|-----------------------------|-----------------------|
| 9.19 | In welke mate werd u gehinderd als u vanuit een zittende positie ging staan?                                           | <input type="radio"/> Niet<br>Ernstig | <input type="radio"/> Mild<br><input type="radio"/> Zeer ernstig | <input type="radio"/> Matig | <input type="radio"/> |
| 9.20 | In welke mate werd u gehinderd bij het staan?                                                                          | <input type="radio"/> Niet<br>Ernstig | <input type="radio"/> Mild<br><input type="radio"/> Zeer ernstig | <input type="radio"/> Matig | <input type="radio"/> |
| 9.21 | In welke mate werd u gehinderd bij het naar de grond buigen/iets oprapen?                                              | <input type="radio"/> Niet<br>Ernstig | <input type="radio"/> Mild<br><input type="radio"/> Zeer ernstig | <input type="radio"/> Matig | <input type="radio"/> |
| 9.22 | In welke mate werd u gehinderd bij het lopen op een vlakke ondergrond?                                                 | <input type="radio"/> Niet<br>Ernstig | <input type="radio"/> Mild<br><input type="radio"/> Zeer ernstig | <input type="radio"/> Matig | <input type="radio"/> |
| 9.23 | In welke mate werd u gehinderd bij het in- en uit de auto stappen?                                                     | <input type="radio"/> Niet<br>Ernstig | <input type="radio"/> Mild<br><input type="radio"/> Zeer ernstig | <input type="radio"/> Matig | <input type="radio"/> |
| 9.24 | In welke mate werd u gehinderd bij het boodschappen doen?                                                              | <input type="radio"/> Niet<br>Ernstig | <input type="radio"/> Mild<br><input type="radio"/> Zeer ernstig | <input type="radio"/> Matig | <input type="radio"/> |
| 9.25 | In welke mate werd u gehinderd bij sokken/panty's aantrekken?                                                          | <input type="radio"/> Niet<br>Ernstig | <input type="radio"/> Mild<br><input type="radio"/> Zeer ernstig | <input type="radio"/> Matig | <input type="radio"/> |
| 9.26 | In welke mate werd u gehinderd bij het opstaan uit bed?                                                                | <input type="radio"/> Niet<br>Ernstig | <input type="radio"/> Mild<br><input type="radio"/> Zeer ernstig | <input type="radio"/> Matig | <input type="radio"/> |
| 9.27 | In welke mate werd u gehinderd bij het sokken uittrekken?                                                              | <input type="radio"/> Niet<br>Ernstig | <input type="radio"/> Mild<br><input type="radio"/> Zeer ernstig | <input type="radio"/> Matig | <input type="radio"/> |
| 9.28 | In welke mate werd u gehinderd bij het in bed liggen (omdraaien, lange tijd uw voet/enkel in dezelfde positie houden)? | <input type="radio"/> Niet<br>Ernstig | <input type="radio"/> Mild<br><input type="radio"/> Zeer ernstig | <input type="radio"/> Matig | <input type="radio"/> |
| 9.29 | In welke mate werd u gehinderd bij het in/uit bad stappen?                                                             | <input type="radio"/> Niet<br>Ernstig | <input type="radio"/> Mild<br><input type="radio"/> Zeer ernstig | <input type="radio"/> Matig | <input type="radio"/> |
| 9.30 | In welke mate werd u gehinderd bij zitten?                                                                             | <input type="radio"/> Niet<br>Ernstig | <input type="radio"/> Mild<br><input type="radio"/> Zeer ernstig | <input type="radio"/> Matig | <input type="radio"/> |
| 9.31 | In welke mate werd u gehinderd bij het toilet op en af gaan?                                                           | <input type="radio"/> Niet<br>Ernstig | <input type="radio"/> Mild<br><input type="radio"/> Zeer ernstig | <input type="radio"/> Matig | <input type="radio"/> |

---

|      |                                                                                                                  |                                                                                                                                                                    |                                                                      |                             |                              |
|------|------------------------------------------------------------------------------------------------------------------|--------------------------------------------------------------------------------------------------------------------------------------------------------------------|----------------------------------------------------------------------|-----------------------------|------------------------------|
| 9.32 | In welke mate werd u gehinderd bij zwaar huishoudelijk werk (bijvoorbeeld zware dozen sjouwen, vloer schrobben)? | <input type="radio"/> Niet<br>Ernstig                                                                                                                              | <input type="radio"/> Mild<br><input type="radio"/> Zeer ernstig     | <input type="radio"/> Matig | <input type="radio"/>        |
| 9.33 | In welke mate werd u gehinderd bij licht huishoudelijk werk (bijvoorbeeld koken, afstoffen)?                     | <input type="radio"/> Niet<br>Ernstig                                                                                                                              | <input type="radio"/> Mild<br><input type="radio"/> Zeer ernstig     | <input type="radio"/> Matig | <input type="radio"/>        |
| 9.34 | In welke mate werd u gehinderd bij hurken?                                                                       | <input type="radio"/> Niet<br>Ernstig                                                                                                                              | <input type="radio"/> Mild<br><input type="radio"/> Zeer ernstig     | <input type="radio"/> Matig | <input type="radio"/>        |
| 9.35 | In welke mate werd u gehinderd bij hardlopen?                                                                    | <input type="radio"/> Niet<br>Ernstig                                                                                                                              | <input type="radio"/> Mild<br><input type="radio"/> Zeer ernstig     | <input type="radio"/> Matig | <input type="radio"/>        |
| 9.36 | In welke mate werd u gehinderd bij springen?                                                                     | <input type="radio"/> Niet<br>Ernstig                                                                                                                              | <input type="radio"/> Mild<br><input type="radio"/> Zeer ernstig     | <input type="radio"/> Matig | <input type="radio"/>        |
| 9.37 | In welke mate werd u gehinderd bij ronddraaien op uw aangedane voet/enkel?                                       | <input type="radio"/> Niet<br>Ernstig                                                                                                                              | <input type="radio"/> Mild<br><input type="radio"/> Zeer ernstig     | <input type="radio"/> Matig | <input type="radio"/>        |
| 9.38 | In welke mate werd u gehinderd bij knielen?                                                                      | <input type="radio"/> Niet<br>Ernstig                                                                                                                              | <input type="radio"/> Mild<br><input type="radio"/> Zeer ernstig     | <input type="radio"/> Matig | <input type="radio"/>        |
| 9.39 | Hoe vaak bent u zich bewust van uw voet/enkel probleem?                                                          | <input type="radio"/> Nooit<br>Wekelijks                                                                                                                           | <input type="radio"/> Maandelijks<br><input type="radio"/> Dagelijks | <input type="radio"/>       | <input type="radio"/> Altijd |
| 9.40 | Heeft u uw leven veranderd om activiteiten te vermijden die schadelijk kunnen zijn voor uw voet/enkel?           | <input type="radio"/> Niet<br><input type="radio"/> Enigszins<br><input type="radio"/> Matig<br><input type="radio"/> Behoorlijk<br><input type="radio"/> Volledig |                                                                      |                             |                              |
| 9.41 | In hoeverre kunt u op uw voet/enkel vertrouwen?                                                                  | <input type="radio"/> Volledig<br><input type="radio"/> Behoorlijk<br><input type="radio"/> Matig<br><input type="radio"/> Enigszins<br><input type="radio"/> Niet |                                                                      |                             |                              |
| 9.42 | In het algemeen, in welke mate ondervindt u hinder van uw voet/enkel                                             | <input type="radio"/> Geen<br><input type="radio"/> Mild<br><input type="radio"/> Matig<br><input type="radio"/> Ernstig<br><input type="radio"/> Zeer ernstig     |                                                                      |                             |                              |



## Vragenlijst PRIMA studie - PRODISQ - Gezondheid en werk

| Number | Question                                                                                                                                                                                                                                                                               | Answers                                                                                                                                                                                                                                                                                                                                                                                                                                                                                                                                                                |
|--------|----------------------------------------------------------------------------------------------------------------------------------------------------------------------------------------------------------------------------------------------------------------------------------------|------------------------------------------------------------------------------------------------------------------------------------------------------------------------------------------------------------------------------------------------------------------------------------------------------------------------------------------------------------------------------------------------------------------------------------------------------------------------------------------------------------------------------------------------------------------------|
| 10.1   | Wat is uw leeftijd?                                                                                                                                                                                                                                                                    | <input type="text"/> jaar                                                                                                                                                                                                                                                                                                                                                                                                                                                                                                                                              |
| 10.2   | Wat is uw geslacht?                                                                                                                                                                                                                                                                    | <input type="radio"/> Man<br><input type="radio"/> Vrouw                                                                                                                                                                                                                                                                                                                                                                                                                                                                                                               |
| 10.3   | Wat is de hoogste opleiding die u heeft afgemaakt (Zoek uw hoogste opleiding en kruis het hokje daarvoor aan)?                                                                                                                                                                         | <input type="checkbox"/> Ik heb geen school of opleiding afgemaakt<br><input type="checkbox"/> Lagere school of basisschool<br><input type="checkbox"/> Huishoudschool, vbo, lbo, lts, leao of lhno<br><input type="checkbox"/> Mavo, mulo, ivo of vmbo<br><input type="checkbox"/> Mbo, mts, meao, mhno, inas of intas<br><input type="checkbox"/> Havo, vwo, hbs, mms, atheneum of gymnasium<br><input type="checkbox"/> Hbo, hts, heao of hhno<br><input type="checkbox"/> Universiteit<br><input type="checkbox"/> Ik heb een andere opleiding afgemaakt, namelijk |
| 10.3.1 | <p><b><i>If 'Wat is de hoogste opleiding die u heeft afgemaakt (Zoek uw hoogste opleiding en kruis het hokje daarvoor aan)?' is equal to 'Ik heb een andere opleiding afgemaakt, namelijk' answer this question:</i></b></p> <p>Wat is de hoogste opleiding die u heeft afgemaakt?</p> | <input type="text"/>                                                                                                                                                                                                                                                                                                                                                                                                                                                                                                                                                   |
| 10.4   | Wat doet u in het dagelijks leven?                                                                                                                                                                                                                                                     | <input type="checkbox"/> Ik zit op school, ik studeer<br><input type="checkbox"/> Ik werk in loondienst<br><input type="checkbox"/> Ik ben zelfstandig ondernemer<br><input type="checkbox"/> Ik ben huisvrouw, huisman<br><input type="checkbox"/> Ik ben werkloos<br><input type="checkbox"/> Ik ben arbeidsongeschikt<br><input type="checkbox"/> Ik ben met pensioen of prepensioen<br><input type="checkbox"/> Ik doe iets anders, namelijk                                                                                                                       |
| 10.4.1 | <p><b><i>If 'Wat doet u in het dagelijks leven?' is equal to 'Ik ben arbeidsongeschikt' answer this question:</i></b></p> <p>Wat doet u in het dagelijks leven?</p>                                                                                                                    | <input type="text"/>                                                                                                                                                                                                                                                                                                                                                                                                                                                                                                                                                   |

|            |                                                                                                                                                                                                                                                                   |                                                                             |
|------------|-------------------------------------------------------------------------------------------------------------------------------------------------------------------------------------------------------------------------------------------------------------------|-----------------------------------------------------------------------------|
| 10.4.2     | <b>If 'Wat doet u in het dagelijks leven?' is equal to 'Ik doe iets anders, namelijk' answer this question:</b><br>Wat doet u in het dagelijks leven?                                                                                                             | <input type="text"/>                                                        |
| 10.5       | Hebt u betaald werk?                                                                                                                                                                                                                                              | <input type="radio"/> Nee<br><input type="radio"/> Ja                       |
| 10.5.1     | <b>If 'Hebt u betaald werk?' is equal to 'Ja' answer this question:</b><br>Wat is uw beroep?                                                                                                                                                                      | <input type="text"/>                                                        |
| 10.5.2     | <b>If 'Hebt u betaald werk?' is equal to 'Ja' answer this question:</b><br>Hoeveel uur per week werkt u (Tel alleen de uren waarvoor u betaald wordt)?                                                                                                            | <input type="text"/> uren                                                   |
| 10.5.3     | <b>If 'Hebt u betaald werk?' is equal to 'Ja' answer this question:</b><br>Hoeveel dagen in de week werkt u?                                                                                                                                                      | <input type="text"/> Dagen                                                  |
| 10.5.4     | <b>If 'Hebt u betaald werk?' is equal to 'Ja' answer this question:</b><br>Bent u in de afgelopen 4 weken afwezig geweest van uw werk omdat u ziek was?                                                                                                           | <input type="radio"/> Nee<br><input type="radio"/> Ja                       |
| 10.5.4.1   | <b>If 'Bent u in de afgelopen 4 weken afwezig geweest van uw werk omdat u ziek was?' is equal to 'Ja' answer this question:</b><br>Bent u in de afgelopen 4 weken afwezig geweest van uw werk omdat u ziek was (Tel alleen de werkdagen in de afgelopen 4 weken)? | <input type="text"/> dagen afwezig geweest                                  |
| 10.5.4.2   | <b>If 'Bent u in de afgelopen 4 weken afwezig geweest van uw werk omdat u ziek was?' is equal to 'Ja' answer this question:</b><br>Was u langer dan de gehele periode van 4 weken afwezig van uw werk doordat u ziek was?                                         | <input type="radio"/> Nee<br><input type="radio"/> Ja                       |
| 10.5.4.2.1 | <b>If 'Was u langer dan de gehele periode van 4 weken afwezig van uw werk doordat u ziek was?' is equal to 'Ja' answer this question:</b><br>Wanneer heeft u zich ziek gemeld?                                                                                    | <input type="text"/> <input type="text"/> <input type="text"/> (dd-mm-yyyy) |
| 10.5.5     | <b>If 'Hebt u betaald werk?' is equal to 'Ja' answer this question:</b><br>Waren er in de afgelopen 4 weken, dagen waarop u wel gewerkt heeft, maar tijdens uw werk last had van lichamelijke of psychische problemen?                                            | <input type="radio"/> Ja<br><input type="radio"/> Nee                       |

|          |                                                                                                                                                                                                                                                                                                                                                                                                                 |                                                       |                                            |
|----------|-----------------------------------------------------------------------------------------------------------------------------------------------------------------------------------------------------------------------------------------------------------------------------------------------------------------------------------------------------------------------------------------------------------------|-------------------------------------------------------|--------------------------------------------|
| 10.5.5.1 | <b>If 'Waren er in de afgelopen 4 weken, dagen waarop u wel gewerkt heeft, maar tijdens uw werk last had van lichamelijke of psychische problemen?' is equal to 'Ja' answer this question:</b><br>Op hoeveel werkdagen had u tijdens uw werk last van uw lichamelijke of psychische problemen?                                                                                                                  | <input type="text"/>                                  | werkdagen                                  |
| 10.5.5.2 | <b>If 'Waren er in de afgelopen 4 weken, dagen waarop u wel gewerkt heeft, maar tijdens uw werk last had van lichamelijke of psychische problemen?' is equal to 'Ja' answer this question:</b><br>Op de dagen dat u last had, kon u misschien niet zoveel werk doen als normaal. Hoeveel werk kon u op deze dagen gemiddeld doen?                                                                               | Ik kon op deze dagen niks doen (0.00)                 | Ik kon net zoveel doen als normaal (10.00) |
| 10.6     | Waren er dagen waarop u minder onbetaald werk kon doen door uw lichamelijke of psychische problemen?                                                                                                                                                                                                                                                                                                            | <input type="radio"/> Nee<br><input type="radio"/> Ja |                                            |
| 10.6.1   | <b>If 'Waren er dagen waarop u minder onbetaald werk kon doen door uw lichamelijke of psychische problemen?' is equal to 'Ja' answer this question:</b><br>Op hoeveel dagen was dit zo?                                                                                                                                                                                                                         | <input type="text"/>                                  | Dagen                                      |
| 10.6.2   | <b>If 'Waren er dagen waarop u minder onbetaald werk kon doen door uw lichamelijke of psychische problemen?' is equal to 'Ja' answer this question:</b><br>Stel dat iemand, bijvoorbeeld uw partner, familielid of een bekende, u op deze dagen had geholpen. En al het onbetaalde werk wat u niet kon doen, voor u had gedaan. Hoeveel uur was die persoon hier op deze dagen dan gemiddeld mee bezig geweest? | <input type="text"/>                                  | uur op deze dagen                          |

## Vragenlijst PRIMA studie - PRODISQ - Zorggebruik

| Number | Question                                                                                                                                                                                      | Answers                                               |
|--------|-----------------------------------------------------------------------------------------------------------------------------------------------------------------------------------------------|-------------------------------------------------------|
|        | Wij willen graag weten met welke dokters u in de afgelopen 3 maanden een afspraak had. Het gaat om afspraken voor uzelf. Ook andere zorgverleners tellen mee. Bijvoorbeeld de fysiotherapeut. |                                                       |
| 11.1   | Bent u in de afgelopen 3 maanden naar uw huisarts geweest?                                                                                                                                    | <input type="radio"/> Nee<br><input type="radio"/> Ja |
| 11.1.1 | <b>If 'Bent u in de afgelopen 3 maanden naar uw huisarts geweest?' is equal to 'Ja' answer this question:</b><br>Hoeveel afspraken had u?                                                     | <input type="text"/> afspraken                        |

|        |                                                                                                                                                                                                                          |                                                       |
|--------|--------------------------------------------------------------------------------------------------------------------------------------------------------------------------------------------------------------------------|-------------------------------------------------------|
| 11.2   | Bent u in de afgelopen 3 maanden in contact geweest met een maatschappelijk werker?                                                                                                                                      | <input type="radio"/> Nee<br><input type="radio"/> Ja |
| 11.2.1 | <b>If 'Bent u in de afgelopen 3 maanden in contact geweest met een maatschappelijk werker?' is equal to 'Ja' answer this question:</b><br>Hoeveel afspraken had u?                                                       | <input type="text"/> afspraken                        |
| 11.3   | Bent u in de afgelopen 3 maanden naar een fysiotherapeut geweest? Of een caesartherapeut, therapeut mensendieck of een manueel therapeut?                                                                                | <input type="radio"/> Nee<br><input type="radio"/> Ja |
| 11.3.1 | <b>If 'Bent u in de afgelopen 3 maanden naar een fysiotherapeut geweest? Of een caesartherapeut, therapeut mensendieck of een manueel therapeut?' is equal to 'Ja' answer this question:</b><br>Hoeveel afspraken had u? | <input type="text"/> afspraken                        |
| 11.4   | Bent u in de afgelopen 3 maanden naar een ergotherapeut geweest?                                                                                                                                                         | <input type="radio"/> Nee<br><input type="radio"/> Ja |
| 11.4.1 | <b>If 'Bent u in de afgelopen 3 maanden naar een ergotherapeut geweest?' is equal to 'Ja' answer this question:</b><br>Hoeveel afspraken had u?                                                                          | <input type="text"/> afspraken                        |
| 11.5   | Bent u in de afgelopen 3 maanden naar een logopedist geweest?                                                                                                                                                            | <input type="radio"/> Nee<br><input type="radio"/> Ja |
| 11.5.1 | <b>If 'Bent u in de afgelopen 3 maanden naar een logopedist geweest?' is equal to 'Ja' answer this question:</b><br>Hoeveel afspraken had u?                                                                             | <input type="text"/> afspraken                        |
| 11.6   | Bent u in de afgelopen 3 maanden naar een diëtist geweest?                                                                                                                                                               | <input type="radio"/> Nee<br><input type="radio"/> Ja |
| 11.6.1 | <b>If 'Bent u in de afgelopen 3 maanden naar een diëtist geweest?' is equal to 'Ja' answer this question:</b><br>Hoeveel afspraken had u?                                                                                | <input type="text"/> afspraken                        |
| 11.7   | Bent u in de afgelopen 3 maanden naar een homeopaat geweest? Of een acupuncturist?                                                                                                                                       | <input type="radio"/> Nee<br><input type="radio"/> Ja |
| 11.7.1 | <b>If 'Bent u in de afgelopen 3 maanden naar een homeopaat geweest? Of een acupuncturist?' is equal to 'Ja' answer this question:</b><br>Hoeveel afspraken had u?                                                        | <input type="text"/> afspraken                        |

|           |                                                                                                                                                                                                                                                                           |                                                                                                                                                                                                                                                                                                     |
|-----------|---------------------------------------------------------------------------------------------------------------------------------------------------------------------------------------------------------------------------------------------------------------------------|-----------------------------------------------------------------------------------------------------------------------------------------------------------------------------------------------------------------------------------------------------------------------------------------------------|
| 11.8      | Bent u in de afgelopen 3 maanden naar een psycholoog geweest? Of een psychotherapeut of psychiater?                                                                                                                                                                       | <input type="radio"/> Nee<br><input type="radio"/> Ja                                                                                                                                                                                                                                               |
| 11.8.1    | <b>If 'Bent u in de afgelopen 3 maanden naar een psycholoog geweest? Of een psychotherapeut of psychiater?' is equal to 'Ja' answer this question:</b><br>Hoeveel afspraken had u?                                                                                        | <input type="text"/> afspraken                                                                                                                                                                                                                                                                      |
| 11.9      | Heeft u in de afgelopen 3 maanden afspraken gehad met de bedrijfsarts?                                                                                                                                                                                                    | <input type="radio"/> Nee<br><input type="radio"/> Ja                                                                                                                                                                                                                                               |
| 11.9.1    | <b>If 'Heeft u in de afgelopen 3 maanden afspraken gehad met de bedrijfsarts?' is equal to 'Ja' answer this question:</b><br>Hoeveel afspraken had u?                                                                                                                     | <input type="text"/> afspraken                                                                                                                                                                                                                                                                      |
| 11.10     | Heeft u in de afgelopen 3 maanden hulp van de thuiszorg gehad?                                                                                                                                                                                                            | <input type="radio"/> Ja<br><input type="radio"/> Nee                                                                                                                                                                                                                                               |
| 11.10.1   | <b>If 'Heeft u in de afgelopen 3 maanden hulp van de thuiszorg gehad?' is equal to 'Ja' answer this question:</b><br>Wat voor hulp van de thuiszorg heeft u gehad in de afgelopen 3 maanden?                                                                              | <input type="checkbox"/> Huishoudelijke hulp; voorbeeld: stofzuigen, bed opmaken, boodschappen doen<br><input type="checkbox"/> Verzorging van uzelf; voorbeeld: hulp bij douchen of aankleden<br><input type="checkbox"/> Verpleging; voorbeeld: verband omdoen, medicijnen geven, bloeddruk meten |
| 11.10.1.1 | <b>If 'Wat voor hulp van de thuiszorg heeft u gehad in de afgelopen 3 maanden?' is equal to 'Huishoudelijke hulp; voorbeeld: stofzuigen, bed opmaken, boodschappen doen' answer this question:</b><br>Hoeveel weken heeft u deze thuiszorg gehad?<br>Huishoudelijke hulp: | <input type="text"/> weken in de afgelopen 3 maanden                                                                                                                                                                                                                                                |
| 11.10.1.2 | <b>If 'Wat voor hulp van de thuiszorg heeft u gehad in de afgelopen 3 maanden?' is equal to 'Verzorging van uzelf; voorbeeld: hulp bij douchen of aankleden' answer this question:</b><br>Hoeveel weken heeft u deze thuiszorg gehad?<br>Verzorging van uzelf:            | <input type="text"/> weken in de afgelopen 3 maanden                                                                                                                                                                                                                                                |
| 11.10.1.3 | <b>If 'Wat voor hulp van de thuiszorg heeft u gehad in de afgelopen 3 maanden?' is equal to 'Verpleging; voorbeeld: verband omdoen, medicijnen geven, bloeddruk meten' answer this question:</b><br>Hoeveel weken heeft u deze thuiszorg gehad?<br>Verpleging:            | <input type="text"/> weken in de afgelopen 3 maanden                                                                                                                                                                                                                                                |

11.10.1.4 **If 'Wat voor hulp van de thuiszorg heeft u gehad in de afgelopen 3 maanden?' is equal to 'Huishoudelijke hulp; voorbeeld: stofzuigen, bed opmaken, boodschappen doen' answer this question:**  
 Hoeveel uur thuiszorg kreeg u in deze weken gemiddeld? Huishoudelijke hulp: gemiddeld

uur in de week

11.10.1.5 **If 'Wat voor hulp van de thuiszorg heeft u gehad in de afgelopen 3 maanden?' is equal to 'Verzorging van uzelf; voorbeeld: hulp bij douchen of aankleden' answer this question:**  
 Hoeveel uur thuiszorg kreeg u in deze weken gemiddeld? Verzorging van uzelf: gemiddeld

uur in de week

11.10.1.6 **If 'Wat voor hulp van de thuiszorg heeft u gehad in de afgelopen 3 maanden?' is equal to 'Verpleging; voorbeeld: verband omdoen, medicijnen geven, bloeddruk meten' answer this question:**  
 Hoeveel uur thuiszorg kreeg u in deze weken gemiddeld? Verpleging: gemiddeld

uur in de week

11.11 Heeft u in de afgelopen 3 maanden medicijnen gebruikt?

Ja  
 Nee

11.11.1 **If 'Heeft u in de afgelopen 3 maanden medicijnen gebruikt?' is equal to 'Ja' answer this question:**  
 Welke medicijnen heeft u in de afgelopen 3 maanden gebruikt?

11.12 Bent u in de afgelopen 3 maanden op de spoedeisende eerste hulp van een ziekenhuis geweest? (Een andere naam voor spoedeisende eerste hulp is EHBO)

Nee  
 Ja

11.12.1 **If 'Bent u in de afgelopen 3 maanden op de spoedeisende eerste hulp van een ziekenhuis geweest? (Een andere naam voor spoedeisende eerste hulp is EHBO)' is equal to 'Ja' answer this question:**  
 Hoe vaak bent u geweest?

keer

11.13 Bent u in de afgelopen 3 maanden met een ambulance naar het ziekenhuis gebracht? (Een andere naam voor ambulance is ziekenauto)

Nee  
 Ja

11.13.1 **If 'Bent u in de afgelopen 3 maanden met een ambulance naar het ziekenhuis gebracht? (Een andere naam voor ambulance is ziekenauto)' is equal to 'Ja' answer this question:**  
 Hoe vaak bent u naar het ziekenhuis gebracht?

keer

|           |                                                                                                                                                                                                                                                                                                                                                                      |                                                                                                                                                                                                             |
|-----------|----------------------------------------------------------------------------------------------------------------------------------------------------------------------------------------------------------------------------------------------------------------------------------------------------------------------------------------------------------------------|-------------------------------------------------------------------------------------------------------------------------------------------------------------------------------------------------------------|
| 11.14     | Had u in de afgelopen 3 maanden een afspraak bij de polikliniek van het ziekenhuis? (Het gaat om afspraken voor uzelf met een dokter. Bijvoorbeeld met de cardioloog, reumatoloog of neuroloog)                                                                                                                                                                      | <input type="radio"/> Ja<br><input type="radio"/> Nee                                                                                                                                                       |
| 11.14.1   | <p><b>If 'Had u in de afgelopen 3 maanden een afspraak bij de polikliniek van het ziekenhuis? (Het gaat om afspraken voor uzelf met een dokter. Bijvoorbeeld met de cardioloog, reumatoloog of neuroloog)' is equal to 'Ja' answer this question:</b></p> <p>Bij welke soorten dokters bent u in de afgelopen 3 maanden in het ziekenhuis geweest? En hoe vaak?</p>  | <div style="border: 1px dashed black; height: 50px; width: 100%;"></div>                                                                                                                                    |
| 11.15     | Bent u in de afgelopen 3 maanden overdag in het ziekenhuis geweest voor een behandeling? (U bleef dus niet slapen. U kwam bijvoorbeeld voor een bloedtransfusie, nierdialyse of chemokuur)                                                                                                                                                                           | <input type="radio"/> Ja<br><input type="radio"/> Nee                                                                                                                                                       |
| 11.15.1   | <p><b>If 'Bent u in de afgelopen 3 maanden overdag in het ziekenhuis geweest voor een behandeling? (U bleef dus niet slapen. U kwam bijvoorbeeld voor een bloedtransfusie, nierdialyse of chemokuur)' is equal to 'Ja' answer this question:</b></p> <p>Voor welke soort behandeling was dit?</p>                                                                    | <div style="border: 1px dashed black; height: 50px; width: 100%;"></div>                                                                                                                                    |
| 11.15.2   | <p><b>If 'Bent u in de afgelopen 3 maanden overdag in het ziekenhuis geweest voor een behandeling? (U bleef dus niet slapen. U kwam bijvoorbeeld voor een bloedtransfusie, nierdialyse of chemokuur)' is equal to 'Ja' answer this question:</b></p> <p>Hoeveel keer moest u in de afgelopen 3 maanden voor deze behandelingen naar het ziekenhuis?</p>              | <div style="border: 1px dashed black; height: 50px; width: 100%;"></div>                                                                                                                                    |
| 11.16     | Bent u in de afgelopen 3 maanden ergens anders geweest voor een behandeling overdag? (U bleef dus niet slapen. U ging bijvoorbeeld naar de dagopvang van een woon-/zorgcentrum of een psychiatrische instelling. Of naar de dagbehandeling van een revalidatiecentrum)                                                                                               | <input type="radio"/> Ja<br><input type="radio"/> Nee                                                                                                                                                       |
| 11.16.1   | <p><b>If 'Bent u in de afgelopen 3 maanden ergens anders geweest voor een behandeling overdag? (U bleef dus niet slapen. U ging bijvoorbeeld naar de dagopvang van een woon-/zorgcentrum of een psychiatrische instelling. Of naar de dagbehandeling van een revalidatiecentrum)' is equal to 'Ja' answer this question:</b></p> <p>Wat voor instelling was dit?</p> | <input type="checkbox"/> Woon-/zorgcentrum<br><input type="checkbox"/> Revalidatiecentrum<br><input type="checkbox"/> Psychiatrische instelling<br><input type="checkbox"/> Een andere instelling, namelijk |
| 11.16.1.1 | <p><b>If 'Wat voor instelling was dit?' is equal to 'Een andere instelling, namelijk' answer this question:</b></p> <p>Wat voor instelling was dit?</p>                                                                                                                                                                                                              | <div style="border: 1px dashed black; height: 50px; width: 100%;"></div>                                                                                                                                    |

|           |                                                                                                                                                                                                                                                                                                 |                                                                                                                                                                                                             |
|-----------|-------------------------------------------------------------------------------------------------------------------------------------------------------------------------------------------------------------------------------------------------------------------------------------------------|-------------------------------------------------------------------------------------------------------------------------------------------------------------------------------------------------------------|
| 11.16.1.2 | <b>If 'Wat voor instelling was dit?' is equal to 'Woon-/zorgcentrum' answer this question:</b><br>Hoe vaak moest u hier in de afgelopen 3 maanden naartoe? Naar het woon-/zorgcentrum:                                                                                                          | <input type="text"/> keer in de afgelopen 3 maanden                                                                                                                                                         |
| 11.16.1.3 | <b>If 'Wat voor instelling was dit?' is equal to 'Revalidatiecentrum' answer this question:</b><br>Hoe vaak moest u hier in de afgelopen 3 maanden naartoe? Naar het revalidatiecentrum:                                                                                                        | <input type="text"/> keer in de afgelopen 3 maanden                                                                                                                                                         |
| 11.16.1.4 | <b>If 'Wat voor instelling was dit?' is equal to 'Psychiatrische instelling' answer this question:</b><br>Hoe vaak moest u hier in de afgelopen 3 maanden naartoe? Naar de psychiatrische instelling:                                                                                           | <input type="text"/> keer in de afgelopen 3 maanden                                                                                                                                                         |
| 11.16.1.5 | <b>If 'Wat voor instelling was dit?' is equal to 'Een andere instelling, namelijk' answer this question:</b><br>Hoe vaak moest u hier in de afgelopen 3 maanden naartoe? Naar de andere instelling:                                                                                             | <input type="text"/> keer in de afgelopen 3 maanden                                                                                                                                                         |
| 11.17     | Heeft u in de afgelopen 3 maanden weleens in het ziekenhuis gelegen? (U moest dus blijven slapen. Bijvoorbeeld omdat u geopereerd was en niet meteen naar huis kon)                                                                                                                             | <input type="radio"/> Ja<br><input type="radio"/> Nee                                                                                                                                                       |
| 11.17.1   | <b>If 'Heeft u in de afgelopen 3 maanden weleens in het ziekenhuis gelegen? (U moest dus blijven slapen. Bijvoorbeeld omdat u geopereerd was en niet meteen naar huis kon)' is equal to 'Ja' answer this question:</b><br>Hoe vaak heeft u in de afgelopen 3 maanden in het ziekenhuis gelegen? | <input type="text"/> keer in de afgelopen 3 maanden                                                                                                                                                         |
| 11.17.2   | <b>If 'Heeft u in de afgelopen 3 maanden weleens in het ziekenhuis gelegen? (U moest dus blijven slapen. Bijvoorbeeld omdat u geopereerd was en niet meteen naar huis kon)' is equal to 'Ja' answer this question:</b><br>Hoe lang heeft u in het ziekenhuis gelegen?                           | <input type="text"/> dagen in de afgelopen 3 maanden                                                                                                                                                        |
| 11.18     | Moest u in de afgelopen 3 maanden ergens anders blijven slapen voor uw gezondheid? (Bijvoorbeeld in een woon-/zorgcentrum, psychiatrische instelling of revalidatiecentrum)                                                                                                                     | <input type="radio"/> Ja<br><input type="radio"/> Nee                                                                                                                                                       |
| 11.18.1   | <b>If 'Moest u in de afgelopen 3 maanden ergens anders blijven slapen voor uw gezondheid? (Bijvoorbeeld in een woon-/zorgcentrum, psychiatrische instelling of revalidatiecentrum)' is equal to 'Ja' answer this question:</b><br>Wat voor instelling was dit?                                  | <input type="checkbox"/> Woon-/zorgcentrum<br><input type="checkbox"/> Revalidatiecentrum<br><input type="checkbox"/> Psychiatrische instelling<br><input type="checkbox"/> Een andere instelling, namelijk |



- 11.18.1.1 **If 'Wat voor instelling was dit?' is equal to 'Een andere instelling, namelijk' answer this question:**  
Een andere instelling, namelijk
- 11.18.1.2 **If 'Wat voor instelling was dit?' is equal to 'Woon-/zorgcentrum' answer this question:**  
Hoe lang bent u in deze instelling geweest? In het woon-/zorgcentrum:
- 11.18.1.3 **If 'Wat voor instelling was dit?' is equal to 'Revalidatiecentrum' answer this question:**  
Hoe lang bent u in deze instelling geweest? In het revalidatiecentrum:
- 11.18.1.4 **If 'Wat voor instelling was dit?' is equal to 'Psychiatrische instelling' answer this question:**  
Hoe lang bent u in deze instelling geweest? In de psychiatrische instelling:
- 11.18.1.5 **If 'Wat voor instelling was dit?' is equal to 'Een andere instelling, namelijk' answer this question:**  
Hoe lang bent u in deze instelling geweest? In de andere instelling:
- 11.19 Heeft u in de afgelopen 3 maanden hulp gekregen van een familielid of een bekende vanwege uw lichamelijke of psychische problemen?
- 11.19.1 **If 'Heeft u in de afgelopen 3 maanden hulp gekregen van een familielid of een bekende vanwege uw lichamelijke of psychische problemen?' is equal to 'Ja' answer this question:**  
Wat voor hulp van familieleden of bekenden heeft u gehad in de afgelopen 3 maanden?
- 11.19.1.1 **If 'Wat voor hulp van familieleden of bekenden heeft u gehad in de afgelopen 3 maanden?' is equal to 'Huishoudelijke hulp - voorbeeld: stofzuigen, bed opmaken, boodschappen doen, klaarmaken van eten en drinken, verzorgen van kinderen' answer this question:**  
Hoeveel weken heeft u deze hulp gehad?  
Huishoudelijke hulp:

|           |                                                                                                                                                                                                                                                                                                                                                                                                                                                 |                                                      |
|-----------|-------------------------------------------------------------------------------------------------------------------------------------------------------------------------------------------------------------------------------------------------------------------------------------------------------------------------------------------------------------------------------------------------------------------------------------------------|------------------------------------------------------|
| 11.19.1.2 | <p><b>If 'Wat voor hulp van familieleden of bekenden heeft u gehad in de afgelopen 3 maanden?' is equal to 'Verzorging van uzelf - voorbeeld: hulp bij douchen of aankleden, hulp bij het eten en drinken of het geven van medicijnen' answer this question:</b></p> <p>Hoeveel weken heeft u deze hulp gehad? Verzorging van uzelf:</p>                                                                                                        | <input type="text"/> weken in de afgelopen 3 maanden |
| 11.19.1.3 | <p><b>If 'Wat voor hulp van familieleden of bekenden heeft u gehad in de afgelopen 3 maanden?' is equal to 'Praktische hulp - voorbeeld: ondersteuning bij wandelen, het maken van uitstapjes of bezoeken aan bekenden, bezoeken aan de huisarts of het ziekenhuis, het regelen van hulp of het regelen van financiële zaken' answer this question:</b></p> <p>Hoeveel uur hulp kreeg u in deze weken gemiddeld? Praktische hulp:</p>           | <input type="text"/> weken in de afgelopen 3 maanden |
| 11.19.1.4 | <p><b>If 'Wat voor hulp van familieleden of bekenden heeft u gehad in de afgelopen 3 maanden?' is equal to 'Huishoudelijke hulp - voorbeeld: stofzuigen, bed opmaken, boodschappen doen, klaarmaken van eten en drinken, verzorgen van kinderen' answer this question:</b></p> <p>Hoeveel uur hulp kreeg u in deze weken gemiddeld? Huishoudelijke hulp: gemiddeld</p>                                                                          | <input type="text"/> uur in de week                  |
| 11.19.1.5 | <p><b>If 'Wat voor hulp van familieleden of bekenden heeft u gehad in de afgelopen 3 maanden?' is equal to 'Verzorging van uzelf - voorbeeld: hulp bij douchen of aankleden, hulp bij het eten en drinken of het geven van medicijnen' answer this question:</b></p> <p>Hoeveel uur hulp kreeg u in deze weken gemiddeld? Verzorging van uzelf: gemiddeld</p>                                                                                   | <input type="text"/> uur in de week                  |
| 11.19.1.6 | <p><b>If 'Wat voor hulp van familieleden of bekenden heeft u gehad in de afgelopen 3 maanden?' is equal to 'Praktische hulp - voorbeeld: ondersteuning bij wandelen, het maken van uitstapjes of bezoeken aan bekenden, bezoeken aan de huisarts of het ziekenhuis, het regelen van hulp of het regelen van financiële zaken' answer this question:</b></p> <p>Hoeveel uur hulp kreeg u in deze weken gemiddeld? Praktische hulp: gemiddeld</p> | <input type="text"/> uur in de week                  |

## Vragenlijst PRIMA studie - Dank

| Number | Question | Answers |
|--------|----------|---------|
|--------|----------|---------|

12.1 Hartelijk dank voor de tijd die u heeft genomen om de vragenlijsten in te vullen. Indien u nog opmerkingen heeft kunt u deze hierin plaatsen.

## Survey 'Vragenlijst PRIMA studie 12 weken'

### Vragenlijst PRIMA studie 12 weken - AOFAS - Pijn

| Number | Question                            | Answers                                                                                                                                                                                                         |
|--------|-------------------------------------|-----------------------------------------------------------------------------------------------------------------------------------------------------------------------------------------------------------------|
| 1.1    | Hoeveel pijn ervaart u aan uw voet? | <input type="checkbox"/> Geen<br><input type="checkbox"/> Milde pijnklachten of af en toe pijn<br><input type="checkbox"/> Matige pijnklachten, dagelijks<br><input type="checkbox"/> Vrijwel continu erge pijn |

### Vragenlijst PRIMA studie 12 weken - AOFAS resterende gedeelte

| Number | Question                                              | Answers                                                                                                                                                                                                                                                                                                                                                                                                                                              |
|--------|-------------------------------------------------------|------------------------------------------------------------------------------------------------------------------------------------------------------------------------------------------------------------------------------------------------------------------------------------------------------------------------------------------------------------------------------------------------------------------------------------------------------|
| 2.1    | Hoeveel beperkingen in het dagelijks leven ervaart u? | <input type="radio"/> Geen beperkingen, geen hulpmiddelen nodig<br><input type="radio"/> Geen beperkingen in algemeen dagelijkse bezigheden, wel beperkingen in recreatieve activiteiten (sport, hobbies, etc) geen ondersteuning<br><input type="radio"/> Beperkingen bij dagelijkse- en recreatieve activiteiten, stok<br><input type="radio"/> Ernstige beperkingen bij dagelijkse- en recreatieve activiteiten, walker, krukken, rolstoel, brace |
| 2.2    | Wat is de afstand die u in één keer kunt lopen?       | <input type="radio"/> Meer dan 600 meter<br><input type="radio"/> 400 - 600 meter<br><input type="radio"/> 100 - 300 meter<br><input type="radio"/> Minder dan 100 meter                                                                                                                                                                                                                                                                             |

|     |                                                                                                                            |                                                                                                                                                                                                                                                                                                             |
|-----|----------------------------------------------------------------------------------------------------------------------------|-------------------------------------------------------------------------------------------------------------------------------------------------------------------------------------------------------------------------------------------------------------------------------------------------------------|
| 2.3 | Heeft u moeite met lopen op een bepaalde ondergrond?                                                                       | <input type="radio"/> Geen problemen bij lopen<br><input type="radio"/> Enig problemen op ongelijke ondergrond, trap, helling, ladders<br><input type="radio"/> Ernstige problemen bij ongelijke ondergrond, trap, helling, ladders                                                                         |
| 2.4 | Hoe zou u uw looppatroon beoordelen?                                                                                       | <input type="radio"/> Normaal of minimaal afwijkend<br><input type="radio"/> Duidelijk<br><input type="radio"/> Ernstig                                                                                                                                                                                     |
| 2.5 | Hoe zou u de beweeglijkheid van uw voet beoordelen ten opzichte van de andere zijde of ten opzichte van vóór het ongeval?  | <input type="radio"/> Hetzelfde of licht beperkt t.o.v. de niet aangedane zijde of zoals voor het ongeval<br><input type="radio"/> Ongeveer de helft beperkt<br><input type="radio"/> Sterk verminderd, bijna geen bewegingen mogelijk                                                                      |
| 2.6 | Hoe zou u de beweeglijkheid van uw enkel beoordelen ten opzichte van de andere zijde of ten opzichte van voor het ongeval? | <input type="radio"/> Hetzelfde of licht beperkt t.o.v. de niet aangedane zijde of zoals voor het ongeval<br><input type="radio"/> Ongeveer de helft beperkt<br><input type="radio"/> Sterk verminderd, bijna geen bewegingen mogelijk                                                                      |
| 2.7 | Hoe zou u de stabiliteit van uw voet en enkel beoordelen                                                                   | <input type="radio"/> Stabiel, ik verzwick mijn enkel hooguit incidenteel<br><input type="radio"/> Niet stabiel, ik verzwick mijn enkel vaak                                                                                                                                                                |
| 2.8 | Hoe zou u de stand van uw voet beoordelen ten opzichte van de andere zijde of ten opzichte van voor het ongeval?           | <input type="radio"/> Goed, ik kan mijn voet goed plat op de grond zetten, waarbij de stand niet afwijkend is<br><input type="radio"/> Ik sta vrijwel alleen op de buitenzijde van mijn voet<br><input type="radio"/> Ik kan mijn voet niet plat op de grond zetten en loop vrijwel alleen op mijn voorvoet |

## Vragenlijst PRIMA studie 12 weken - VAS Pain score

| Number | Question                                                                                                                                                             | Answers             |
|--------|----------------------------------------------------------------------------------------------------------------------------------------------------------------------|---------------------|
| 3.1    | VAS pijnscore (Geef uw minimaal pijnscore aan tijdens dagelijkse activiteiten op een schaal van 0 tot 100, waarbij 0 geen pijn is en 100 de ergste pijn denkbaar is) | (0.00) 100 (100.00) |

## Vragenlijst PRIMA studie 12 weken - AAS

| Number | Question | Answers |
|--------|----------|---------|
|--------|----------|---------|

- 
- 4.1 Wat is het meest bij u van toepassing ten aanzien van uw activiteit?
- American Football
  - Basketbal
  - Gymnastiek/turnen
  - Handbal
  - Rugby
  - Voetbal
  - Hockey
  - Korfbal
  - Gevechtssporten: judo, karate, kung fu, taekwando, jiu jitsu, etc.
  - Oriëntatielopen
  - Rhythmische gymnastiek
  - Volleybal
  - Boxen
  - Freestyle snowboarden
  - Ijshockey
  - Tennis
  - Worstelen
  - Fitness, aerobics
  - Badminton
  - Baseball
  - Cross-country hardlopen
  - Moderne pentathlon
  - Squash
  - Surfen, windsurfen
  - Tafel tennis
  - Atletiek: spring-, werponderdelen
  - Waterskieën
  - Dans
  - Schermen
  - Zaalhockey
  - Bergbeklimmen
  - Langlauf
  - Parachute springen
  - Softball
  - Speciale beroepen en werkactiviteiten; speciale beroepen: ballet, professioneel soldaat, speciale reddingswerker, stuntman, etc.
  - Duiken
  - Scubaduiken
  - Skaten, in-line skaten
  - Atletiek: looponderdelen
  - Triatlon
  - Gewichtsheffen, body-building
-

- Alle competitieve sporten hieronder met 'seasonal' conditioning
- Zwaar fysiek werk
- Alpine skiën en snowboarden
- Bowlen/curlen
- Golf
- Mountainbike/BMX
- Powerliften
- Zeilen
- Fysiek werk
- Wielrennen
- Paardrijden
- Motorsporten/technische sporten
- Roeien, kayaken
- Boogschieten
- Water polo en zwemmen
- Kunnen lopen op oneven grond
- Geen sport, echter geen limitatie in dagelijkse activiteiten
- Kunnen lopen op even grond, maar de dagelijkse activiteiten zijn gelimiteerd
- Niet kunnen lopen, fysieke handicap wegens enkelproblemen

4.1.1 ***If 'Wat is het meest bij u van toepassing ten aanzien van uw activiteit?' is equal to 'American Football' answer this question:***  
American Football

Professioneel  
 Competitief  
 Recreatief

4.1.2 ***If 'Wat is het meest bij u van toepassing ten aanzien van uw activiteit?' is equal to 'Basketbal' answer this question:***  
Basketbal

Professioneel  
 Competitief  
 Recreatief

4.1.3 ***If 'Wat is het meest bij u van toepassing ten aanzien van uw activiteit?' is equal to 'Gymnastiek/turnen' answer this question:***  
Gymnastiek/turnen

Professioneel  
 Competitief  
 Recreatief

4.1.4 ***If 'Wat is het meest bij u van toepassing ten aanzien van uw activiteit?' is equal to 'Handbal' answer this question:***  
Handbal

Professioneel  
 Competitief  
 Recreatief

4.1.5 ***If 'Wat is het meest bij u van toepassing ten aanzien van uw activiteit?' is equal to 'Rugby' answer this question:***  
Rugby

Professioneel  
 Competitief  
 Recreatief

|        |                                                                                                                                                                                                                                                               |                                                                                                              |
|--------|---------------------------------------------------------------------------------------------------------------------------------------------------------------------------------------------------------------------------------------------------------------|--------------------------------------------------------------------------------------------------------------|
| 4.1.6  | <b>If 'Wat is het meest bij u van toepassing ten aanzien van uw acitviteit?' is equal to 'Voetbal' answer this question:</b><br>Voetbal                                                                                                                       | <input type="radio"/> Professioneel<br><input type="radio"/> Competitief<br><input type="radio"/> Recreatief |
| 4.1.7  | <b>If 'Wat is het meest bij u van toepassing ten aanzien van uw acitviteit?' is equal to 'Hockey' answer this question:</b><br>Hockey                                                                                                                         | <input type="radio"/> Professioneel<br><input type="radio"/> Competitief<br><input type="radio"/> Recreatief |
| 4.1.8  | <b>If 'Wat is het meest bij u van toepassing ten aanzien van uw acitviteit?' is equal to 'Korfbal' answer this question:</b><br>Korfbal                                                                                                                       | <input type="radio"/> Professioneel<br><input type="radio"/> Competitief<br><input type="radio"/> Recreatief |
| 4.1.9  | <b>If 'Wat is het meest bij u van toepassing ten aanzien van uw acitviteit?' is equal to 'Gevechtssporten: judo, karate, kung fu, taekwando, jiu jitsu, etc.' answer this question:</b><br>Gevechtssporten: judo, karate, kung fu, taekwando, jiu jitsu, etc. | <input type="radio"/> Professioneel<br><input type="radio"/> Competitief<br><input type="radio"/> Recreatief |
| 4.1.10 | <b>If 'Wat is het meest bij u van toepassing ten aanzien van uw acitviteit?' is equal to 'Oriëntatielopen' answer this question:</b><br>Oriëntatielopen                                                                                                       | <input type="radio"/> Professioneel<br><input type="radio"/> Competitief<br><input type="radio"/> Recreatief |
| 4.1.11 | <b>If 'Wat is het meest bij u van toepassing ten aanzien van uw acitviteit?' is equal to 'Rhythmische gymnastiek' answer this question:</b><br>Rhythmisch gymnastiek                                                                                          | <input type="radio"/> Professioneel<br><input type="radio"/> Competitief<br><input type="radio"/> Recreatief |
| 4.1.12 | <b>If 'Wat is het meest bij u van toepassing ten aanzien van uw acitviteit?' is equal to 'Volleybal' answer this question:</b><br>Volleybal                                                                                                                   | <input type="radio"/> Professioneel<br><input type="radio"/> Competitief<br><input type="radio"/> Recreatief |
| 4.1.13 | <b>If 'Wat is het meest bij u van toepassing ten aanzien van uw acitviteit?' is equal to 'Boxen' answer this question:</b><br>Boxen                                                                                                                           | <input type="radio"/> Professioneel<br><input type="radio"/> Competitief<br><input type="radio"/> Recreatief |
| 4.1.14 | <b>If 'Wat is het meest bij u van toepassing ten aanzien van uw acitviteit?' is equal to 'Freestyle snowboarden' answer this question:</b><br>Freestyle snowboarden                                                                                           | <input type="radio"/> Professioneel<br><input type="radio"/> Competitief<br><input type="radio"/> Recreatief |
| 4.1.15 | <b>If 'Wat is het meest bij u van toepassing ten aanzien van uw acitviteit?' is equal to 'Freestyle snowboarden' answer this question:</b><br>Ijshockey                                                                                                       | <input type="radio"/> Professioneel<br><input type="radio"/> Competitief<br><input type="radio"/> Recreatief |



|        |                                                                                                                                                                         |                                                                                                              |
|--------|-------------------------------------------------------------------------------------------------------------------------------------------------------------------------|--------------------------------------------------------------------------------------------------------------|
| 4.1.16 | <b>If 'Wat is het meest bij u van toepassing ten aanzien van uw activiteit?' is equal to 'Tennis' answer this question:</b><br>Tennis                                   | <input type="radio"/> Professioneel<br><input type="radio"/> Competitief<br><input type="radio"/> Recreatief |
| 4.1.17 | <b>If 'Wat is het meest bij u van toepassing ten aanzien van uw activiteit?' is equal to 'Worstelen' answer this question:</b><br>Worstelen                             | <input type="radio"/> Professioneel<br><input type="radio"/> Competitief<br><input type="radio"/> Recreatief |
| 4.1.18 | <b>If 'Wat is het meest bij u van toepassing ten aanzien van uw activiteit?' is equal to 'Fitness, aerobics' answer this question:</b><br>Fitness, aerobics             | <input type="radio"/> Professioneel<br><input type="radio"/> Competitief<br><input type="radio"/> Recreatief |
| 4.1.19 | <b>If 'Wat is het meest bij u van toepassing ten aanzien van uw activiteit?' is equal to 'Badminton' answer this question:</b><br>Badminton                             | <input type="radio"/> Professioneel<br><input type="radio"/> Competitief<br><input type="radio"/> Recreatief |
| 4.1.20 | <b>If 'Wat is het meest bij u van toepassing ten aanzien van uw activiteit?' is equal to 'Baseball' answer this question:</b><br>Baseball                               | <input type="radio"/> Professioneel<br><input type="radio"/> Competitief<br><input type="radio"/> Recreatief |
| 4.1.21 | <b>If 'Wat is het meest bij u van toepassing ten aanzien van uw activiteit?' is equal to 'Cross-country hardlopen' answer this question:</b><br>Cross-country hardlopen | <input type="radio"/> Professioneel<br><input type="radio"/> Competitief<br><input type="radio"/> Recreatief |
| 4.1.22 | <b>If 'Wat is het meest bij u van toepassing ten aanzien van uw activiteit?' is equal to 'Moderne pentathlon' answer this question:</b><br>Moderne pentathlon           | <input type="radio"/> Professioneel<br><input type="radio"/> Competitief<br><input type="radio"/> Recreatief |
| 4.1.23 | <b>If 'Wat is het meest bij u van toepassing ten aanzien van uw activiteit?' is equal to 'Squash' answer this question:</b><br>Squash                                   | <input type="radio"/> Professioneel<br><input type="radio"/> Competitief<br><input type="radio"/> Recreatief |
| 4.1.24 | <b>If 'Wat is het meest bij u van toepassing ten aanzien van uw activiteit?' is equal to 'Surfen, windsurfen' answer this question:</b><br>Surfen, windsurfen           | <input type="radio"/> Professioneel<br><input type="radio"/> Competitief<br><input type="radio"/> Recreatief |
| 4.1.25 | <b>If 'Wat is het meest bij u van toepassing ten aanzien van uw activiteit?' is equal to 'Tafel tennis' answer this question:</b><br>Tafel tennis                       | <input type="radio"/> Professioneel<br><input type="radio"/> Competitief<br><input type="radio"/> Recreatief |

|        |                                                                                                                                                                                             |                                                                                                              |
|--------|---------------------------------------------------------------------------------------------------------------------------------------------------------------------------------------------|--------------------------------------------------------------------------------------------------------------|
| 4.1.26 | <b>If 'Wat is het meest bij u van toepassing ten aanzien van uw acitviteit?' is equal to 'Atletiek: spring-, werponderdelen' answer this question:</b><br>Atletiek: spring-, werponderdelen | <input type="radio"/> Professioneel<br><input type="radio"/> Competitief<br><input type="radio"/> Recreatief |
| 4.1.27 | <b>If 'Wat is het meest bij u van toepassing ten aanzien van uw acitviteit?' is equal to 'Waterskieën' answer this question:</b><br>Waterskien                                              | <input type="radio"/> Professioneel<br><input type="radio"/> Competitief<br><input type="radio"/> Recreatief |
| 4.1.28 | <b>If 'Wat is het meest bij u van toepassing ten aanzien van uw acitviteit?' is equal to 'Dans' answer this question:</b><br>Dans                                                           | <input type="radio"/> Professioneel<br><input type="radio"/> Competitief<br><input type="radio"/> Recreatief |
| 4.1.29 | <b>If 'Wat is het meest bij u van toepassing ten aanzien van uw acitviteit?' is equal to 'Schermen' answer this question:</b><br>Schermen                                                   | <input type="radio"/> Professioneel<br><input type="radio"/> Competitief<br><input type="radio"/> Recreatief |
| 4.1.30 | <b>If 'Wat is het meest bij u van toepassing ten aanzien van uw acitviteit?' is equal to 'Zaalhockey' answer this question:</b><br>Zaalhockey                                               | <input type="radio"/> Professioneel<br><input type="radio"/> Competitief<br><input type="radio"/> Recreatief |
| 4.1.31 | <b>If 'Wat is het meest bij u van toepassing ten aanzien van uw acitviteit?' is equal to 'Bergbeklimmen' answer this question:</b><br>Bergbeklimmen                                         | <input type="radio"/> Professioneel<br><input type="radio"/> Competitief<br><input type="radio"/> Recreatief |
| 4.1.32 | <b>If 'Wat is het meest bij u van toepassing ten aanzien van uw acitviteit?' is equal to 'Langlauf' answer this question:</b><br>Langlauf                                                   | <input type="radio"/> Professioneel<br><input type="radio"/> Competitief<br><input type="radio"/> Recreatief |
| 4.1.33 | <b>If 'Wat is het meest bij u van toepassing ten aanzien van uw acitviteit?' is equal to 'Parachute springen' answer this question:</b><br>Parachute springen                               | <input type="radio"/> Professioneel<br><input type="radio"/> Competitief<br><input type="radio"/> Recreatief |
| 4.1.34 | <b>If 'Wat is het meest bij u van toepassing ten aanzien van uw acitviteit?' is equal to 'Softball' answer this question:</b><br>Softball                                                   | <input type="radio"/> Professioneel<br><input type="radio"/> Competitief<br><input type="radio"/> Recreatief |

|        |                                                                                                                                                                                                                                                                                                                                                                                                     |                                                                                              |
|--------|-----------------------------------------------------------------------------------------------------------------------------------------------------------------------------------------------------------------------------------------------------------------------------------------------------------------------------------------------------------------------------------------------------|----------------------------------------------------------------------------------------------|
| 4.1.35 | <p><b>If 'Wat is het meest bij u van toepassing ten aanzien van uw activiteit?' is equal to 'Speciale beroepen en werkactiviteiten; speciale beroepen: ballet, professioneel soldaat, speciale reddingswerker, stuntman, etc.' answer this question:</b></p> <p>Speciale beroepen en werkactiviteiten speciale beroepen: ballet, professioneel soldaat, speciale reddingswerker, stuntman, etc.</p> | <input type="radio"/> ballet, professioneel soldaat, speciale reddingswerker, stuntman, etc. |
| 4.1.36 | <p><b>If 'Wat is het meest bij u van toepassing ten aanzien van uw activiteit?' is equal to 'Duiken' answer this question:</b></p> <p>Duiken</p>                                                                                                                                                                                                                                                    | <input type="radio"/> Professioneel/competitief<br><input type="radio"/> Recreatief          |
| 4.1.37 | <p><b>If 'Wat is het meest bij u van toepassing ten aanzien van uw activiteit?' is equal to 'Scubaduiken' answer this question:</b></p> <p>Scubaduiken</p>                                                                                                                                                                                                                                          | <input type="radio"/> Professioneel/competitief<br><input type="radio"/> Recreatief          |
| 4.1.38 | <p><b>If 'Wat is het meest bij u van toepassing ten aanzien van uw activiteit?' is equal to 'Skaten, in-line skaten' answer this question:</b></p> <p>skaten, in-linen skaten</p>                                                                                                                                                                                                                   | <input type="radio"/> Professioneel/competitief<br><input type="radio"/> Recreatief          |
| 4.1.39 | <p><b>If 'Wat is het meest bij u van toepassing ten aanzien van uw activiteit?' is equal to 'Atletiek: looponderdelen' answer this question:</b></p> <p>Atletiek: looponderdelen</p>                                                                                                                                                                                                                | <input type="radio"/> Professioneel/competitief<br><input type="radio"/> Recreatief          |
| 4.1.40 | <p><b>If 'Wat is het meest bij u van toepassing ten aanzien van uw activiteit?' is equal to 'Triatlon' answer this question:</b></p> <p>triatlon</p>                                                                                                                                                                                                                                                | <input type="radio"/> Professioneel/competitief<br><input type="radio"/> Recreatief          |
| 4.1.41 | <p><b>If 'Wat is het meest bij u van toepassing ten aanzien van uw activiteit?' is equal to 'Gewichtsheffen, body-building' answer this question:</b></p> <p>Gewichtsheffen, body-building</p>                                                                                                                                                                                                      | <input type="radio"/> Professioneel/competitief<br><input type="radio"/> Recreatief          |
| 4.1.42 | <p><b>If 'Wat is het meest bij u van toepassing ten aanzien van uw activiteit?' is equal to 'Alle competitieve sporten hieronder met 'seasonal' conditioning' answer this question:</b></p> <p>Alle competitieve sporten hieronder met 'seasonal' conditioning</p>                                                                                                                                  | <input type="radio"/> Alle competitieve sporten hieronder met 'seasonal' conditioning        |
| 4.1.43 | <p><b>If 'Wat is het meest bij u van toepassing ten aanzien van uw activiteit?' is equal to 'Zwaar fysiek werk' answer this question:</b></p> <p>Zwaar fysiek werk</p>                                                                                                                                                                                                                              | <input type="radio"/> Alle competitieve sporten hieronder met 'seasonal' conditioning        |

|        |                                                                                                                                                                                         |                                                       |
|--------|-----------------------------------------------------------------------------------------------------------------------------------------------------------------------------------------|-------------------------------------------------------|
| 4.1.44 | <b>If 'Wat is het meest bij u van toepassing ten aanzien van uw activiteit?' is equal to 'Alpine skiën en snowboarden' answer this question:</b><br>Alpine skien en snowboarden         | <input type="radio"/> Alpine skien en snowboarden     |
| 4.1.45 | <b>If 'Wat is het meest bij u van toepassing ten aanzien van uw activiteit?' is equal to 'Bowlen/curlen' answer this question:</b><br>Bowlen/curlen                                     | <input type="radio"/> Bowlen/curlen                   |
| 4.1.46 | <b>If 'Wat is het meest bij u van toepassing ten aanzien van uw activiteit?' is equal to 'Golf' answer this question:</b><br>Golf                                                       | <input type="radio"/> Golf                            |
| 4.1.47 | <b>If 'Wat is het meest bij u van toepassing ten aanzien van uw activiteit?' is equal to 'Mountainbike/BMX' answer this question:</b><br>Mountainbike/BMX                               | <input type="radio"/> Mountainbike/BMX                |
| 4.1.48 | <b>If 'Wat is het meest bij u van toepassing ten aanzien van uw activiteit?' is equal to 'Powerliften' answer this question:</b><br>Powerliften                                         | <input type="radio"/> Powerliften                     |
| 4.1.49 | <b>If 'Wat is het meest bij u van toepassing ten aanzien van uw activiteit?' is equal to 'Zeilen' answer this question:</b><br>Zeilen                                                   | <input type="radio"/> Zeilen                          |
| 4.1.50 | <b>If 'Wat is het meest bij u van toepassing ten aanzien van uw activiteit?' is equal to 'Fysiek werk' answer this question:</b><br>Fysiek werk                                         | <input type="radio"/> Fysiek werk                     |
| 4.1.51 | <b>If 'Wat is het meest bij u van toepassing ten aanzien van uw activiteit?' is equal to 'Wielrennen' answer this question:</b><br>Wielrennen                                           | <input type="radio"/> Wielrennen                      |
| 4.1.52 | <b>If 'Wat is het meest bij u van toepassing ten aanzien van uw activiteit?' is equal to 'Paardrijden' answer this question:</b><br>Paardrijden                                         | <input type="radio"/> Paardrijden                     |
| 4.1.53 | <b>If 'Wat is het meest bij u van toepassing ten aanzien van uw activiteit?' is equal to 'Motorsporten/technische sporten' answer this question:</b><br>Motorsporten/technische sporten | <input type="radio"/> Motorsporten/technische sporten |
| 4.1.54 | <b>If 'Wat is het meest bij u van toepassing ten aanzien van uw activiteit?' is equal to 'Roeien, kayakken' answer this question:</b><br>Roeien, kayakken                               | <input type="radio"/> Roeien, kayakken                |

|        |                                                                                                                                                                                                                                                                                   |                                                                                                    |
|--------|-----------------------------------------------------------------------------------------------------------------------------------------------------------------------------------------------------------------------------------------------------------------------------------|----------------------------------------------------------------------------------------------------|
| 4.1.55 | <b>If 'Wat is het meest bij u van toepassing ten aanzien van uw activiteit?' is equal to 'Boogschieten' answer this question:</b><br>Boogschieten                                                                                                                                 | <input type="radio"/> Boogschieten                                                                 |
| 4.1.56 | <b>If 'Wat is het meest bij u van toepassing ten aanzien van uw activiteit?' is equal to 'Water polo en zwemmen' answer this question:</b><br>Water polo en zwemmen                                                                                                               | <input type="radio"/> Water polo en zwemmen                                                        |
| 4.1.57 | <b>If 'Wat is het meest bij u van toepassing ten aanzien van uw activiteit?' is equal to 'Kunnen lopen op oneven grond' answer this question:</b><br>Kunnen lopen op oneven grond                                                                                                 | <input type="radio"/> Kunnen lopen op oneven grond                                                 |
| 4.1.58 | <b>If 'Wat is het meest bij u van toepassing ten aanzien van uw activiteit?' is equal to 'Geen sport, echter geen limitatie in dagelijkse activiteiten' answer this question:</b><br>Geen sport, echter geen limitatie in dagelijkse activiteiten                                 | <input type="radio"/> Geen sport, echter geen limitatie in dagelijkse activiteiten                 |
| 4.1.59 | <b>If 'Wat is het meest bij u van toepassing ten aanzien van uw activiteit?' is equal to 'Kunnen lopen op even grond, maar de dagelijkse activiteiten zijn gelimiteerd' answer this question:</b><br>Kunnen lopen op even grond, maar de dagelijkse activiteiten zijn gelimiteerd | <input type="radio"/> Kunnen lopen op even grond, maar de dagelijkse activiteiten zijn gelimiteerd |
| 4.1.60 | <b>If 'Wat is het meest bij u van toepassing ten aanzien van uw activiteit?' is equal to 'Niet kunnen lopen, fysieke handicap wegens enkelproblemen' answer this question:</b><br>Niet kunnen lopen, fysieke handicap wegens enkelproblemen                                       | <input type="radio"/> Niet kunnen lopen, fysieke handicap wegens enkelproblemen                    |

## Vragenlijst PRIMA studie 12 weken - Hoe tevreden bent u over de enkelklachten?

| Number | Question                                   | Answers                                                                                                                       |
|--------|--------------------------------------------|-------------------------------------------------------------------------------------------------------------------------------|
| 5.1    | Hoe tevreden bent u over de enkelklachten? | <input type="radio"/> Slecht<br><input type="radio"/> Matig<br><input type="radio"/> Goed<br><input type="radio"/> Uitstekend |

## Vragenlijst PRIMA studie 12 weken - SF-36

| Number | Question                                                                                                                                                                                                                                                                                                                                                           | Answers                                                                                                                                                                                                                                                                                   |
|--------|--------------------------------------------------------------------------------------------------------------------------------------------------------------------------------------------------------------------------------------------------------------------------------------------------------------------------------------------------------------------|-------------------------------------------------------------------------------------------------------------------------------------------------------------------------------------------------------------------------------------------------------------------------------------------|
|        | Deze vragenlijst gaat over uw standpunten t.a.v. uw gezondheid. Met behulp van deze gegevens kan worden bijgehouden hoe u zich voelt en hoe goed u in staat bent uw gebruikelijke bezigheden uit te voeren. Beantwoord elke vraag door een antwoord aan te klikken. Als u niet zeker weet hoe u een vraag moet beantwoorden, geef dan het best mogelijke antwoord. |                                                                                                                                                                                                                                                                                           |
| 6.1    | Hoe zou u over het algemeen uw gezondheid noemen?                                                                                                                                                                                                                                                                                                                  | <input type="radio"/> Uitstekend <input type="radio"/> Zeer goed <input type="radio"/> Goed <input type="radio"/> Matig <input type="radio"/> Slecht                                                                                                                                      |
| 6.2    | Hoe beoordeelt u nu uw gezondheid over het algemeen vergeleken met een jaar geleden?                                                                                                                                                                                                                                                                               | <input type="radio"/> Veel beter dan een jaar geleden <input type="radio"/> Wat beter dan een jaar geleden <input type="radio"/> Ongeveer hetzelfde als een jaar geleden <input type="radio"/> Wat slechter dan een jaar geleden <input type="radio"/> Veel slechter dan een jaar geleden |
| 6.3    | Wordt u door uw gezondheid op dit moment beperkt bij forse inspanning, zoals hardlopen, tillen van zware voorwerpen of een veeleisende sport beoefenen?                                                                                                                                                                                                            | <input type="radio"/> Ja, ernstig beperkt <input type="radio"/> Ja, een beetje beperkt <input type="radio"/> Nee, helemaal niet beperkt                                                                                                                                                   |
| 6.4    | Wordt u door uw gezondheid op dit moment beperkt bij matige inspanning zoals een tafel verplaatsen, stofzuigen, zwemmen of fietsen?                                                                                                                                                                                                                                | <input type="radio"/> Ja, ernstig beperkt <input type="radio"/> Ja, een beetje beperkt <input type="radio"/> Nee, helemaal niet beperkt                                                                                                                                                   |
| 6.5    | Wordt u door uw gezondheid op dit moment beperkt bij boodschappen tillen of dragen?                                                                                                                                                                                                                                                                                | <input type="radio"/> Ja, ernstig beperkt <input type="radio"/> Ja, een beetje beperkt <input type="radio"/> Nee, helemaal niet beperkt                                                                                                                                                   |
| 6.6    | Wordt u door uw gezondheid op dit moment beperkt bij een paar trappen oplopen?                                                                                                                                                                                                                                                                                     | <input type="radio"/> Ja, ernstig beperkt <input type="radio"/> Ja, een beetje beperkt <input type="radio"/> Nee, helemaal niet beperkt                                                                                                                                                   |
| 6.7    | Wordt u door uw gezondheid op dit moment beperkt bij één trap oplopen?                                                                                                                                                                                                                                                                                             | <input type="radio"/> Ja, ernstig beperkt <input type="radio"/> Ja, een beetje beperkt <input type="radio"/> Nee, helemaal niet beperkt                                                                                                                                                   |
| 6.8    | Wordt u door uw gezondheid op dit moment beperkt bij bukken, knielen of hurken?                                                                                                                                                                                                                                                                                    | <input type="radio"/> Ja, ernstig beperkt <input type="radio"/> Ja, een beetje beperkt <input type="radio"/> Nee, helemaal niet beperkt                                                                                                                                                   |
| 6.9    | Wordt u door uw gezondheid op dit moment beperkt bij meer dan één kilometer lopen?                                                                                                                                                                                                                                                                                 | <input type="radio"/> Ja, ernstig beperkt <input type="radio"/> Ja, een beetje beperkt <input type="radio"/> Nee, helemaal niet beperkt                                                                                                                                                   |
| 6.10   | Wordt u door uw gezondheid op dit moment beperkt bij een paar honderd meter lopen?                                                                                                                                                                                                                                                                                 | <input type="radio"/> Ja, ernstig beperkt <input type="radio"/> Ja, een beetje beperkt <input type="radio"/> Nee, helemaal niet beperkt                                                                                                                                                   |

|      |                                                                                                                                                                                                             |                                              |                                              |                                                  |
|------|-------------------------------------------------------------------------------------------------------------------------------------------------------------------------------------------------------------|----------------------------------------------|----------------------------------------------|--------------------------------------------------|
| 6.11 | Wordt u door uw gezondheid op dit moment beperkt bij ongeveer honderd meter lopen?                                                                                                                          | <input type="radio"/> Ja, ernstig beperkt    | <input type="radio"/> Ja, een beetje beperkt | <input type="radio"/> Nee, helemaal niet beperkt |
| 6.12 | Wordt u door uw gezondheid op dit moment beperkt bij uzelf wassen of aankleden?                                                                                                                             | <input type="radio"/> Ja, ernstig beperkt    | <input type="radio"/> Ja, een beetje beperkt | <input type="radio"/> Nee, helemaal niet beperkt |
| 6.13 | U besteedde in de afgelopen 4 weken minder tijd aan werk of andere bezigheden                                                                                                                               | <input type="radio"/> Ja                     | <input type="radio"/> Nee                    |                                                  |
| 6.14 | U heeft in de afgelopen 4 weken minder bereikt dan u zou willen                                                                                                                                             | <input type="radio"/> Ja                     | <input type="radio"/> Nee                    |                                                  |
| 6.15 | U was in de afgelopen 4 weken beperkt in het soort werk of andere bezigheden.                                                                                                                               | <input type="radio"/> Ja                     | <input type="radio"/> Nee                    |                                                  |
| 6.16 | U had de afgelopen 4 weken moeite om uw werk of andere bezigheden uit te voeren (het kostte u bijvoorbeeld extra inspanning).                                                                               | <input type="radio"/> Ja                     | <input type="radio"/> Nee                    |                                                  |
| 6.17 | U besteedde in de afgelopen 4 weken minder tijd aan werk of andere bezigheden ten gevolge van emotionele problemen                                                                                          | <input type="radio"/> Ja                     | <input type="radio"/> Nee                    |                                                  |
| 6.18 | U heeft in de afgelopen 4 weken minder bereikt dan u zou willen ten gevolge van emotionele problemen.                                                                                                       | <input type="radio"/> Ja                     | <input type="radio"/> Nee                    |                                                  |
| 6.19 | U deed de afgelopen 4 weken uw werk of andere bezigheden niet zo zorgvuldig als gewoonlijk ten gevolge van emotionele problemen.                                                                            | <input type="radio"/> Ja                     | <input type="radio"/> Nee                    |                                                  |
| 6.20 | In hoeverre hebben uw lichamelijke gezondheid of emotionele problemen u gedurende de afgelopen 4 weken gehinderd in uw normale omgang met familie, vrienden of buren, of bij activiteiten in groepsverband? | <input type="radio"/> Helemaal niet<br>Nogal | <input type="radio"/> Enigszins<br>Veel      | <input type="radio"/>                            |
| 6.21 | Hoeveel lichamelijke pijn heeft u de afgelopen 4 weken gehad?                                                                                                                                               | <input type="radio"/> Geen                   | <input type="radio"/> Heel licht             | <input type="radio"/> Licht                      |
|      |                                                                                                                                                                                                             | <input type="radio"/> Nogal                  | <input type="radio"/> Ernstig                | <input type="radio"/> Heel ernstig               |
| 6.22 | In welke mate bent u de afgelopen 4 weken door de pijn gehinderd in uw normale werk (zowel werk buitenshuis als huishoudelijk werk)?                                                                        | <input type="radio"/> Helemaal niet          | <input type="radio"/> Een klein beetje       | <input type="radio"/> Nogal                      |
|      |                                                                                                                                                                                                             | <input type="radio"/> Veel                   | <input type="radio"/> Heel erg veel          |                                                  |

---

6.23      Voelde u zich levenslustig?

Altijd  
 Meestal  
 Vaak  
 Soms  
 Zelden  
 Nooit

---

6.24      Was u erg zenuwachtig?

Altijd  
 Meestal  
 Vaak  
 Soms  
 Zelden  
 Nooit

---

6.25      Zat u zo in de put dat u niets kon?

Altijd  
 Meestal  
 Vaak  
 Soms  
 Zelden  
 Nooit

---

6.26      Voelde u zich rustig en tevreden?

Altijd  
 Meestal  
 Vaak  
 Soms  
 Zelden  
 Nooit

---

6.27      Had u veel energie?

Altijd  
 Meestal  
 Vaak  
 Soms  
 Zelden  
 Nooit

---

6.28      Voelde u zich somber en neerslachtig?

Altijd  
 Meestal  
 Vaak  
 Soms  
 Zelden  
 Nooit



---

6.29 Voelde u zich uitgeput?

- Altijd
- Meestal
- Vaak
- Soms
- Zelden
- Nooit

---

6.30 Was u een gelukkig mens?

- Altijd
- Meestal
- Vaak
- Soms
- Zelden
- Nooit

---

6.31 Voelde u zich moe?

- Altijd
- Meestal
- Vaak
- Soms
- Zelden
- Nooit

---

6.32 Hoe vaak hebben uw lichamelijke gezondheid of emotionele problemen u gedurende de afgelopen 4 weken gehinderd bij uw sociale activiteiten (zoals vrienden of familie bezoeken etc.)?

- Altijd
- Meestal
- Soms
- Zelden
- Nooit

---

6.33 Ik lijk wat gemakkelijker ziek te worden dan andere mensen

- Volkomen juist
- Grotendeels juist
- Weet ik niet
- Grotendeels onjuist
- Volkomen onjuist

---

6.34 Ik ben even gezond als andere mensen die ik ken

- Volkomen juist
- Grotendeels juist
- Weet ik niet
- Grotendeels onjuist
- Volkomen onjuist

- |      |                                                    |                                                                                                                                                                                                              |
|------|----------------------------------------------------|--------------------------------------------------------------------------------------------------------------------------------------------------------------------------------------------------------------|
| 6.35 | Ik verwacht dat mijn gezondheid achteruit zal gaan | <input type="radio"/> Volkomen juist<br><input type="radio"/> Grotendeels juist<br><input type="radio"/> Weet ik niet<br><input type="radio"/> Grotendeels onjuist<br><input type="radio"/> Volkomen onjuist |
| 6.36 | Mijn gezondheid is uitstekend                      | <input type="radio"/> Volkomen juist<br><input type="radio"/> Grotendeels juist<br><input type="radio"/> Weet ik niet<br><input type="radio"/> Grotendeels onjuist<br><input type="radio"/> Volkomen onjuist |

## Vragenlijst PRIMA studie 12 weken - GAS

| Number | Question                                                                                                                                                                                  | Answers                                                                                                                                                                                                                                                                              |
|--------|-------------------------------------------------------------------------------------------------------------------------------------------------------------------------------------------|--------------------------------------------------------------------------------------------------------------------------------------------------------------------------------------------------------------------------------------------------------------------------------------|
|        | Tijdens de eerste afspraak werd een duidelijk doel met u afgesproken. Dit werd tevens per email naar u gestuurd. Hoe is de situatie nu ten aanzien van de destijds gestelde doelstelling? |                                                                                                                                                                                                                                                                                      |
| 7.1    | Wat is nu de situatie ten aanzien van het tijdens de eerste afspraak afgesproken doelstelling (Goal attainment Scaling)?                                                                  | <input type="radio"/> Achteruitgang (minder dan de uitgangssituatie)<br><input type="radio"/> Uitgangssituatie<br><input type="radio"/> Minder dan het doel<br><input type="radio"/> Doel<br><input type="radio"/> Meer dan het doel<br><input type="radio"/> Veel meer dan het doel |

## Vragenlijst PRIMA studie 12 weken - EQ-5D-3L

| Number | Question                                                                                                                                                                                                                                                                                                                                                           | Answers                                                                                                                                                    |
|--------|--------------------------------------------------------------------------------------------------------------------------------------------------------------------------------------------------------------------------------------------------------------------------------------------------------------------------------------------------------------------|------------------------------------------------------------------------------------------------------------------------------------------------------------|
|        | Deze vragenlijst gaat over uw standpunten t.a.v. uw gezondheid. Met behulp van deze gegevens kan worden bijgehouden hoe u zich voelt en hoe goed u in staat bent uw gebruikelijke bezigheden uit te voeren. Beantwoord elke vraag door een antwoord aan te klikken. Als u niet zeker weet hoe u een vraag moet beantwoorden, geef dan het best mogelijke antwoord. |                                                                                                                                                            |
| 8.1    | Hoe is het met uw Mobiliteit gesteld?                                                                                                                                                                                                                                                                                                                              | <input type="radio"/> Ik heb geen problemen met lopen<br><input type="radio"/> Ik heb enige problemen met lopen<br><input type="radio"/> Ik ben bedlegerig |

|                                                                                                                                                                                                                                            |                                                                                                                  |                                                                                                                                                                                                                                                             |
|--------------------------------------------------------------------------------------------------------------------------------------------------------------------------------------------------------------------------------------------|------------------------------------------------------------------------------------------------------------------|-------------------------------------------------------------------------------------------------------------------------------------------------------------------------------------------------------------------------------------------------------------|
| 8.2                                                                                                                                                                                                                                        | Hoe is het met uw Zelfzorg gesteld?                                                                              | <input type="radio"/> Ik heb geen problemen om mijzelf te wassen of aan te kleden<br><input type="radio"/> Ik heb enige problemen om mijzelf te wassen of aan te kleden<br><input type="radio"/> Ik ben niet in staat om mijzelf te wassen of aan te kleden |
| 8.3                                                                                                                                                                                                                                        | Hoe is het met de Dagelijkse activiteiten (werk, studie, huishouden, gezins- en vrijetijdsactiviteiten) gesteld? | <input type="radio"/> Ik heb geen problemen met mijn dagelijkse activiteiten<br><input type="radio"/> Ik heb enige problemen met mijn dagelijkse activiteiten<br><input type="radio"/> Ik ben niet in staat om mijn dagelijkse activiteiten uit te voeren   |
| 8.4                                                                                                                                                                                                                                        | Hoe is het met de Pijn/klachten gesteld?                                                                         | <input type="radio"/> Ik heb geen pijn of andere klachten<br><input type="radio"/> Ik heb matige pijn of andere klachten<br><input type="radio"/> Ik heb zeer ernstige pijn of andere klachten                                                              |
| 8.5                                                                                                                                                                                                                                        | Hoe is het met de Stemming gesteld?                                                                              | <input type="radio"/> Ik ben niet angstig of somber<br><input type="radio"/> Ik ben matig angstig of somber<br><input type="radio"/> Ik ben erg angstig of somber                                                                                           |
| <p>We willen weten hoe goed of slecht uw gezondheid VANDAAG is. Deze meetschaal loopt van 0 tot 100: 100 staat voor de BESTE gezondheid die u zich kunt voorstellen - 0 staat voor de SLECHTSTE gezondheid die u zich kunt voorstellen</p> |                                                                                                                  |                                                                                                                                                                                                                                                             |
| 8.6                                                                                                                                                                                                                                        | Uw Gezondheid vandaag                                                                                            | (0.00) (100.00)                                                                                                                                                                                                                                             |

## Vragenlijst PRIMA studie 12 weken - AOS

| Number                                                                                                                                                                                                                                                                                                                                                                                                               | Question                                                   | Answers                                                                                            |
|----------------------------------------------------------------------------------------------------------------------------------------------------------------------------------------------------------------------------------------------------------------------------------------------------------------------------------------------------------------------------------------------------------------------|------------------------------------------------------------|----------------------------------------------------------------------------------------------------|
| <p>Instructies: De lijn naast elke vraag staat voor hoeveel PIJN u heeft in verschillende situaties. De linker kant (0) is "geen pijn" en de rechter kant (100) is "ergste pijn denkbaar". Geef voor de onderstaande situaties op de lijn aan hoeveel PIJN u in de afgelopen week in de enkel had. Als een of meerdere van deze situaties niet van toepassing waren, dan kiest u de "niet van toepassing" optie.</p> |                                                            |                                                                                                    |
| 9.1                                                                                                                                                                                                                                                                                                                                                                                                                  | Wat was de hoogte van de ergste pijn in de afgelopen week? | (0.00) (100.00)                                                                                    |
| 9.2                                                                                                                                                                                                                                                                                                                                                                                                                  | Heeft u pijn als u 's ochtends opstaat?                    | <input type="radio"/> Ja<br><input type="radio"/> Nee<br><input type="radio"/> Niet van toepassing |

|       |                                                                                                                                                                                          |                                                                                                    |          |
|-------|------------------------------------------------------------------------------------------------------------------------------------------------------------------------------------------|----------------------------------------------------------------------------------------------------|----------|
| 9.2.1 | <b><i>If 'Heeft u pijn als u 's ochtends opstaat?' is equal to 'Ja' answer this question:</i></b><br>Hoeveel pijn heeft u voordat u 's ochtends opstaat?                                 | (0.00)                                                                                             | (100.00) |
| 9.3   | Heeft u pijn wanneer u op blote voeten loopt?                                                                                                                                            | <input type="radio"/> Ja<br><input type="radio"/> Nee<br><input type="radio"/> Niet van toepassing |          |
| 9.3.1 | <b><i>If 'Heeft u pijn wanneer u op blote voeten loopt?' is equal to 'Ja' answer this question:</i></b><br>Hoeveel pijn heeft u als u op blote voeten loopt?                             | (0.00)                                                                                             | (100.00) |
| 9.4   | Heeft u pijn wanneer u op blote voeten staat?                                                                                                                                            | <input type="radio"/> Ja<br><input type="radio"/> Nee<br><input type="radio"/> Niet van toepassing |          |
| 9.4.1 | <b><i>If 'Heeft u pijn wanneer u op blote voeten staat?' is equal to 'Ja' answer this question:</i></b><br>Hoeveel pijn heeft u als u op blote voeten staat?                             | (0.00)                                                                                             | (100.00) |
| 9.5   | Heeft u pijn wanneer u met schoenen loopt?                                                                                                                                               | <input type="radio"/> Ja<br><input type="radio"/> Nee<br><input type="radio"/> Niet van toepassing |          |
| 9.5.1 | <b><i>If 'Heeft u pijn wanneer u met schoenen loopt?' is equal to 'Ja' answer this question:</i></b><br>Hoeveel pijn heeft u wanneer u met schoenen loopt?                               | (0.00)                                                                                             | (100.00) |
| 9.6   | Heeft u pijn wanneer u met schoenen staat?                                                                                                                                               | <input type="radio"/> Ja<br><input type="radio"/> Nee<br><input type="radio"/> Niet van toepassing |          |
| 9.6.1 | <b><i>If 'Heeft u pijn wanneer u met schoenen staat?' is equal to 'Ja' answer this question:</i></b><br>Hoeveel pijn heeft u wanneer u met schoenen staat?                               | (0.00)                                                                                             | (100.00) |
| 9.7   | Heeft u pijn wanneer u loopt met steunzolen of een brace?                                                                                                                                | <input type="radio"/> Ja<br><input type="radio"/> Nee<br><input type="radio"/> Niet van toepassing |          |
| 9.7.1 | <b><i>If 'Heeft u pijn wanneer u loopt met steunzolen of een brace?' is equal to 'Ja' answer this question:</i></b><br>Hoeveel pijn heeft u wanneer u loopt met steunzolen of een brace? | (0.00)                                                                                             | (100.00) |

|     |                                                           |                                                                                                    |
|-----|-----------------------------------------------------------|----------------------------------------------------------------------------------------------------|
| 9.8 | Heeft u pijn wanneer u staat met steunzolen of een brace? | <input type="radio"/> Ja<br><input type="radio"/> Nee<br><input type="radio"/> Niet van toepassing |
|-----|-----------------------------------------------------------|----------------------------------------------------------------------------------------------------|

|       |                                                                                                                                                                                   |        |          |
|-------|-----------------------------------------------------------------------------------------------------------------------------------------------------------------------------------|--------|----------|
| 9.8.1 | <b>If 'Heeft u pijn wanneer u staat met steunzolen of een brace?' is equal to 'Ja' answer this question:</b><br>Hoeveel pijn heeft u wanneer u staat met steunzolen of een brace? | (0.00) | (100.00) |
|-------|-----------------------------------------------------------------------------------------------------------------------------------------------------------------------------------|--------|----------|

|     |                                        |                                                                                                    |
|-----|----------------------------------------|----------------------------------------------------------------------------------------------------|
| 9.9 | Heeft u pijn aan het einde van de dag? | <input type="radio"/> Ja<br><input type="radio"/> Nee<br><input type="radio"/> Niet van toepassing |
|-----|----------------------------------------|----------------------------------------------------------------------------------------------------|

|       |                                                                                                                                             |        |          |
|-------|---------------------------------------------------------------------------------------------------------------------------------------------|--------|----------|
| 9.9.1 | <b>If 'Heeft u pijn aan het einde van de dag?' is equal to 'Ja' answer this question:</b><br>Hoeveel pijn heeft u aan het einde van de dag? | (0.00) | (100.00) |
|-------|---------------------------------------------------------------------------------------------------------------------------------------------|--------|----------|

Instructies:De lijn naast elke vraag staat voor hoeveel MOEITE u heeft met verschillende activiteiten. De linker kant (0) is "Niet moeilijk" en de rechter kant (100) is "Te moeilijk, niet uitvoerbaar". Geef voor de onderstaande activiteiten op de lijn aan hoeveel MOEITE u in de afgelopen week door enkelklachten had met onderstaande activiteiten. Als een situatie niet van toepassing is, kies dan de optie "niet van toepassing".

|      |                                         |                                                                                                    |
|------|-----------------------------------------|----------------------------------------------------------------------------------------------------|
| 9.10 | Heeft u moeite met door het huis lopen? | <input type="radio"/> Ja<br><input type="radio"/> Nee<br><input type="radio"/> Niet van toepassing |
|------|-----------------------------------------|----------------------------------------------------------------------------------------------------|

|        |                                                                                                                                               |        |          |
|--------|-----------------------------------------------------------------------------------------------------------------------------------------------|--------|----------|
| 9.10.1 | <b>If 'Heeft u moeite met door het huis lopen?' is equal to 'Ja' answer this question:</b><br>Hoeveel moeite heeft u met door het huis lopen? | (0.00) | (100.00) |
|--------|-----------------------------------------------------------------------------------------------------------------------------------------------|--------|----------|

|      |                                                       |                                                                                                    |
|------|-------------------------------------------------------|----------------------------------------------------------------------------------------------------|
| 9.11 | Heeft u moeite met buiten lopen op oneven ondergrond? | <input type="radio"/> Ja<br><input type="radio"/> Nee<br><input type="radio"/> Niet van toepassing |
|------|-------------------------------------------------------|----------------------------------------------------------------------------------------------------|

|        |                                                                                                                                                                           |        |          |
|--------|---------------------------------------------------------------------------------------------------------------------------------------------------------------------------|--------|----------|
| 9.11.1 | <b>If 'Heeft u moeite met buiten lopen op oneven ondergrond?' is equal to 'Ja' answer this question:</b><br>Hoeveel moeite heeft u met buiten lopen op oneven ondergrond? | (0.00) | (100.00) |
|--------|---------------------------------------------------------------------------------------------------------------------------------------------------------------------------|--------|----------|

|      |                                                  |                                                                                                    |
|------|--------------------------------------------------|----------------------------------------------------------------------------------------------------|
| 9.12 | Heeft u moeite met een paar honderd meter lopen? | <input type="radio"/> Ja<br><input type="radio"/> Nee<br><input type="radio"/> Niet van toepassing |
|------|--------------------------------------------------|----------------------------------------------------------------------------------------------------|

|        |                                                                                                                                                                 |        |          |
|--------|-----------------------------------------------------------------------------------------------------------------------------------------------------------------|--------|----------|
| 9.12.1 | <b>If 'Heeft u moeite met een paar honderd meter lopen?' is equal to 'Ja' answer this question:</b><br>Hoeveel moeite heeft u met een paar honderd meter lopen? | (0.00) | (100.00) |
|--------|-----------------------------------------------------------------------------------------------------------------------------------------------------------------|--------|----------|

|        |                                                                                                                                                                                 |                                                                                                    |        |          |
|--------|---------------------------------------------------------------------------------------------------------------------------------------------------------------------------------|----------------------------------------------------------------------------------------------------|--------|----------|
| 9.13   | Heeft u moeite met een trap oplopen?                                                                                                                                            | <input type="radio"/> Ja<br><input type="radio"/> Nee<br><input type="radio"/> Niet van toepassing |        |          |
| 9.13.1 | <b>If 'Heeft u moeite met een trap oplopen?' is equal to 'Ja' answer this question:</b><br>Hoeveel moeite heeft u met een trap oplopen?                                         |                                                                                                    | (0.00) | (100.00) |
| 9.14   | Heeft u moeite met een trap aflopen?                                                                                                                                            | <input type="radio"/> Ja<br><input type="radio"/> Nee<br><input type="radio"/> Niet van toepassing |        |          |
| 9.14.1 | <b>If 'Heeft u moeite met een trap aflopen?' is equal to 'Ja' answer this question:</b><br>Hoeveel moeite heeft u met een trap aflopen?                                         |                                                                                                    | (0.00) | (100.00) |
| 9.15   | Heeft u moeite met op de tenen staan?                                                                                                                                           | <input type="radio"/> Ja<br><input type="radio"/> Nee<br><input type="radio"/> Niet van toepassing |        |          |
| 9.15.1 | <b>If 'Heeft u moeite met op de tenen staan?' is equal to 'Ja' answer this question:</b><br>Hoeveel moeite heeft u met op de tenen staan?                                       |                                                                                                    | (0.00) | (100.00) |
| 9.16   | Heeft u moeite met opstaan uit de stoel?                                                                                                                                        | <input type="radio"/> Ja<br><input type="radio"/> Nee<br><input type="radio"/> Niet van toepassing |        |          |
| 9.16.1 | <b>If 'Heeft u moeite met opstaan uit de stoel?' is equal to 'Ja' answer this question:</b><br>Hoeveel moeite heeft u met opstaan uit de stoel?                                 |                                                                                                    | (0.00) | (100.00) |
| 9.17   | Heeft u moeite met het op- of afstappen van stoepranden?                                                                                                                        | <input type="radio"/> Ja<br><input type="radio"/> Nee<br><input type="radio"/> Niet van toepassing |        |          |
| 9.17.1 | <b>If 'Heeft u moeite met het op- of afstappen van stoepranden?' is equal to 'Ja' answer this question:</b><br>Hoeveel moeite heeft u met het op- of afstappen van stoepranden? |                                                                                                    | (0.00) | (100.00) |
| 9.18   | Heeft u moeite met snel lopen of rennen?                                                                                                                                        | <input type="radio"/> Ja<br><input type="radio"/> Nee<br><input type="radio"/> Niet van toepassing |        |          |

9.18.1 **If 'Heeft u moeite met snel lopen of rennen?' is equal to 'Ja' answer this question:** (0.00) (100.00)  
Hoeveel moeite heeft u met snel lopen of rennen?

## Vragenlijst PRIMA studie 12 weken - FAOS

| Number                                                                                                                                                                                                                                                                                                                                                                                                                                                                                                                                                                                     | Question                                                                                             | Answers                                                                                                                                                    |
|--------------------------------------------------------------------------------------------------------------------------------------------------------------------------------------------------------------------------------------------------------------------------------------------------------------------------------------------------------------------------------------------------------------------------------------------------------------------------------------------------------------------------------------------------------------------------------------------|------------------------------------------------------------------------------------------------------|------------------------------------------------------------------------------------------------------------------------------------------------------------|
| <p>Deze lijst vraagt naar uw mening over uw voet/enkel. Uw antwoorden geven ons een beeld van uw voet/enkel klachten en hoe u in staat bent om alledaagse activiteiten uit te voeren in uw huidige situatie. Beantwoorden van een vraag doet u door het aanklikken van een vakje met het volgens u meest juiste antwoord (één vakje per vraag). Als u niet zeker weet hoe u een vraag moet beantwoorden, geeft u dan het antwoord dat volgens u het meest op uw situatie van toepassing is. Deze vraag heeft betrekking op het voorkomen van voet/enkel klachten in de afgelopen week.</p> |                                                                                                      |                                                                                                                                                            |
| 10.1                                                                                                                                                                                                                                                                                                                                                                                                                                                                                                                                                                                       | Is uw voet/enkel gezwollen?                                                                          | <input type="radio"/> Nooit <input type="radio"/> Zelden <input type="radio"/> Soms <input type="radio"/> Vaak <input type="radio"/> Altijd                |
| 10.2                                                                                                                                                                                                                                                                                                                                                                                                                                                                                                                                                                                       | Voelt u gekraak of hoort u klikken of een ander vreemd geluid wanneer u de voet/enkel beweegt?       | <input type="radio"/> Nooit <input type="radio"/> Zelden <input type="radio"/> Soms <input type="radio"/> Vaak <input type="radio"/> Altijd                |
| 10.3                                                                                                                                                                                                                                                                                                                                                                                                                                                                                                                                                                                       | Hapert uw enkel of blokkeert uw enkel ('op slot' gaan zitten) wanneer u deze beweegt?                | <input type="radio"/> Nooit <input type="radio"/> Zelden <input type="radio"/> Soms <input type="radio"/> Vaak <input type="radio"/> Altijd                |
| 10.4                                                                                                                                                                                                                                                                                                                                                                                                                                                                                                                                                                                       | Kunt u de voet/enkel volledig strekken?                                                              | <input type="radio"/> Altijd <input type="radio"/> Vaak <input type="radio"/> Soms <input type="radio"/> Zelden <input type="radio"/> Nooit                |
| 10.5                                                                                                                                                                                                                                                                                                                                                                                                                                                                                                                                                                                       | Kunt u de voet volledig naar u toe buigen?                                                           | <input type="radio"/> Altijd <input type="radio"/> Vaak <input type="radio"/> Soms <input type="radio"/> Zelden <input type="radio"/> Nooit                |
| 10.6                                                                                                                                                                                                                                                                                                                                                                                                                                                                                                                                                                                       | In welke mate heeft u een stijf gevoel in de voet/enkel 's ochtends bij het wakker worden?           | <input type="radio"/> Niet Ernstig <input type="radio"/> Mild <input type="radio"/> Matig <input type="radio"/> Zeer ernstig                               |
| 10.7                                                                                                                                                                                                                                                                                                                                                                                                                                                                                                                                                                                       | In welke mate heeft u een stijf gevoel in de voet/enkel na zitten, liggen of rusten later op de dag? | <input type="radio"/> Niet Ernstig <input type="radio"/> Mild <input type="radio"/> Matig <input type="radio"/> Zeer ernstig                               |
| 10.8                                                                                                                                                                                                                                                                                                                                                                                                                                                                                                                                                                                       | Hoe vaak heeft u pijn in uw voet/enkel?                                                              | <input type="radio"/> Nooit <input type="radio"/> Maandelijks <input type="radio"/> Wekelijks <input type="radio"/> Dagelijks <input type="radio"/> Altijd |

- 
- 10.9 Hoeveel voet/enkel pijn heeft u gehad in de afgelopen week bij draaien als uw voet/enkel op de grond staat?
- Geen  
 Mild  
 Matig  
 Ernstig  
 Zeer ernstig
- 
- 10.10 Hoeveel voet/enkel pijn heeft u gehad in de afgelopen week bij het volledig uitstrekken van de voet/enkel?
- Geen  
 Mild  
 Matig  
 Ernstig  
 Zeer ernstig
- 
- 10.11 Hoeveel voet/enkel pijn heeft u gehad in de afgelopen week bij het volledig naar u toe buigen/optrekken van de voet/enkel
- Geen  
 Mild  
 Matig  
 Ernstig  
 Zeer ernstig
- 
- 10.12 Hoeveel voet/enkel pijn heeft u gehad in de afgelopen week bij het lopen op een vlakke ondergrond
- Geen  
 Mild  
 Matig  
 Ernstig  
 Zeer ernstig
- 
- 10.13 Hoeveel voet/enkel pijn heeft u gehad in de afgelopen week bij het trap op- en trap af lopen?
- Geen  
 Mild  
 Matig  
 Ernstig  
 Zeer ernstig
- 
- 10.14 Hoeveel voet/enkel pijn heeft u gehad in de afgelopen week 's nachts in bed?
- Geen  
 Mild  
 Matig  
 Ernstig  
 Zeer ernstig
- 
- 10.15 Hoeveel voet/enkel pijn heeft u gehad in de afgelopen week bij het zitten of liggen?
- Geen  
 Mild  
 Matig  
 Ernstig  
 Zeer ernstig



|       |                                                                                                                        |                                    |                            |                             |                                    |                                    |
|-------|------------------------------------------------------------------------------------------------------------------------|------------------------------------|----------------------------|-----------------------------|------------------------------------|------------------------------------|
| 10.16 | Hoeveel voet/enkel pijn heeft u gehad in de afgelopen week bij het rechtop staan?                                      | <input type="radio"/> Geen         | <input type="radio"/> Mild | <input type="radio"/> Matig | <input type="radio"/> Ernstig      | <input type="radio"/> Zeer ernstig |
| 10.17 | In welke mate werd u gehinderd bij het trap aflopen?                                                                   | <input type="radio"/> Niet Ernstig | <input type="radio"/> Mild | <input type="radio"/> Matig | <input type="radio"/> Zeer ernstig | <input type="radio"/>              |
| 10.18 | In welke mate werd u gehinderd bij het trap op lopen?                                                                  | <input type="radio"/> Niet Ernstig | <input type="radio"/> Mild | <input type="radio"/> Matig | <input type="radio"/> Zeer ernstig | <input type="radio"/>              |
| 10.19 | In welke mate werd u gehinderd als u vanuit een zittende positie ging staan?                                           | <input type="radio"/> Niet Ernstig | <input type="radio"/> Mild | <input type="radio"/> Matig | <input type="radio"/> Zeer ernstig | <input type="radio"/>              |
| 10.20 | In welke mate werd u gehinderd bij het staan?                                                                          | <input type="radio"/> Niet Ernstig | <input type="radio"/> Mild | <input type="radio"/> Matig | <input type="radio"/> Zeer ernstig | <input type="radio"/>              |
| 10.21 | In welke mate werd u gehinderd bij het naar de grond buigen/iets oprapen?                                              | <input type="radio"/> Niet Ernstig | <input type="radio"/> Mild | <input type="radio"/> Matig | <input type="radio"/> Zeer ernstig | <input type="radio"/>              |
| 10.22 | In welke mate werd u gehinderd bij het lopen op een vlakke ondergrond?                                                 | <input type="radio"/> Niet Ernstig | <input type="radio"/> Mild | <input type="radio"/> Matig | <input type="radio"/> Zeer ernstig | <input type="radio"/>              |
| 10.23 | In welke mate werd u gehinderd bij het in- en uit de auto stappen?                                                     | <input type="radio"/> Niet Ernstig | <input type="radio"/> Mild | <input type="radio"/> Matig | <input type="radio"/> Zeer ernstig | <input type="radio"/>              |
| 10.24 | In welke mate werd u gehinderd bij het boodschappen doen?                                                              | <input type="radio"/> Niet Ernstig | <input type="radio"/> Mild | <input type="radio"/> Matig | <input type="radio"/> Zeer ernstig | <input type="radio"/>              |
| 10.25 | In welke mate werd u gehinderd bij sokken/panty's aantrekken?                                                          | <input type="radio"/> Niet Ernstig | <input type="radio"/> Mild | <input type="radio"/> Matig | <input type="radio"/> Zeer ernstig | <input type="radio"/>              |
| 10.26 | In welke mate werd u gehinderd bij het opstaan uit bed?                                                                | <input type="radio"/> Niet Ernstig | <input type="radio"/> Mild | <input type="radio"/> Matig | <input type="radio"/> Zeer ernstig | <input type="radio"/>              |
| 10.27 | In welke mate werd u gehinderd bij het sokken uittrekken?                                                              | <input type="radio"/> Niet Ernstig | <input type="radio"/> Mild | <input type="radio"/> Matig | <input type="radio"/> Zeer ernstig | <input type="radio"/>              |
| 10.28 | In welke mate werd u gehinderd bij het in bed liggen (omdraaien, lange tijd uw voet/enkel in dezelfde positie houden)? | <input type="radio"/> Niet Ernstig | <input type="radio"/> Mild | <input type="radio"/> Matig | <input type="radio"/> Zeer ernstig | <input type="radio"/>              |

|       |                                                                                                                  |                                                                                                                                                                    |                                                                      |                             |                              |
|-------|------------------------------------------------------------------------------------------------------------------|--------------------------------------------------------------------------------------------------------------------------------------------------------------------|----------------------------------------------------------------------|-----------------------------|------------------------------|
| 10.29 | In welke mate werd u gehinderd bij het in/uit bad stappen?                                                       | <input type="radio"/> Niet<br>Ernstig                                                                                                                              | <input type="radio"/> Mild<br><input type="radio"/> Zeer ernstig     | <input type="radio"/> Matig | <input type="radio"/>        |
| 10.30 | In welke mate werd u gehinderd bij zitten?                                                                       | <input type="radio"/> Niet<br>Ernstig                                                                                                                              | <input type="radio"/> Mild<br><input type="radio"/> Zeer ernstig     | <input type="radio"/> Matig | <input type="radio"/>        |
| 10.31 | In welke mate werd u gehinderd bij het toilet op en af gaan?                                                     | <input type="radio"/> Niet<br>Ernstig                                                                                                                              | <input type="radio"/> Mild<br><input type="radio"/> Zeer ernstig     | <input type="radio"/> Matig | <input type="radio"/>        |
| 10.32 | In welke mate werd u gehinderd bij zwaar huishoudelijk werk (bijvoorbeeld zware dozen sjouwen, vloer schrobben)? | <input type="radio"/> Niet<br>Ernstig                                                                                                                              | <input type="radio"/> Mild<br><input type="radio"/> Zeer ernstig     | <input type="radio"/> Matig | <input type="radio"/>        |
| 10.33 | In welke mate werd u gehinderd bij licht huishoudelijk werk (bijvoorbeeld koken, afstoffen)?                     | <input type="radio"/> Niet<br>Ernstig                                                                                                                              | <input type="radio"/> Mild<br><input type="radio"/> Zeer ernstig     | <input type="radio"/> Matig | <input type="radio"/>        |
| 10.34 | In welke mate werd u gehinderd bij hurken?                                                                       | <input type="radio"/> Niet<br>Ernstig                                                                                                                              | <input type="radio"/> Mild<br><input type="radio"/> Zeer ernstig     | <input type="radio"/> Matig | <input type="radio"/>        |
| 10.35 | In welke mate werd u gehinderd bij hardlopen?                                                                    | <input type="radio"/> Niet<br>Ernstig                                                                                                                              | <input type="radio"/> Mild<br><input type="radio"/> Zeer ernstig     | <input type="radio"/> Matig | <input type="radio"/>        |
| 10.36 | In welke mate werd u gehinderd bij springen?                                                                     | <input type="radio"/> Niet<br>Ernstig                                                                                                                              | <input type="radio"/> Mild<br><input type="radio"/> Zeer ernstig     | <input type="radio"/> Matig | <input type="radio"/>        |
| 10.37 | In welke mate werd u gehinderd bij ronddraaien op uw aangedane voet/enkel?                                       | <input type="radio"/> Niet<br>Ernstig                                                                                                                              | <input type="radio"/> Mild<br><input type="radio"/> Zeer ernstig     | <input type="radio"/> Matig | <input type="radio"/>        |
| 10.38 | In welke mate werd u gehinderd bij knielen?                                                                      | <input type="radio"/> Niet<br>Ernstig                                                                                                                              | <input type="radio"/> Mild<br><input type="radio"/> Zeer ernstig     | <input type="radio"/> Matig | <input type="radio"/>        |
| 10.39 | Hoe vaak bent u zich bewust van uw voet/enkel probleem?                                                          | <input type="radio"/> Nooit<br>Wekelijks                                                                                                                           | <input type="radio"/> Maandelijks<br><input type="radio"/> Dagelijks | <input type="radio"/>       | <input type="radio"/> Altijd |
| 10.40 | Heeft u uw leven veranderd om activiteiten te vermijden die schadelijk kunnen zijn voor uw voet/enkel?           | <input type="radio"/> Niet<br><input type="radio"/> Enigszins<br><input type="radio"/> Matig<br><input type="radio"/> Behoorlijk<br><input type="radio"/> Volledig |                                                                      |                             |                              |

- 10.41 In hoeverre kunt u op uw voet/enkel vertrouwen?
- Volledig
- Behoorlijk
- Matig
- Enigzins
- Niet

- 10.42 In het algemeen, in welke mate ondervindt u hinder van uw voet/enkel
- Geen
- Mild
- Matig
- Ernstig
- Zeer ernstig

## Vragenlijst PRIMA studie 12 weken - PRODISQ - Gezondheid en werk

| Number | Question                                                                                                                                                                                                                                                                               | Answers                                                                                                                                                                                                                                                                                                                                                                                                                                                                                                                                                                |
|--------|----------------------------------------------------------------------------------------------------------------------------------------------------------------------------------------------------------------------------------------------------------------------------------------|------------------------------------------------------------------------------------------------------------------------------------------------------------------------------------------------------------------------------------------------------------------------------------------------------------------------------------------------------------------------------------------------------------------------------------------------------------------------------------------------------------------------------------------------------------------------|
| 11.1   | Wat is uw leeftijd?                                                                                                                                                                                                                                                                    | <input type="text"/> jaar                                                                                                                                                                                                                                                                                                                                                                                                                                                                                                                                              |
| 11.2   | Wat is uw geslacht?                                                                                                                                                                                                                                                                    | <input type="radio"/> Man<br><input type="radio"/> Vrouw                                                                                                                                                                                                                                                                                                                                                                                                                                                                                                               |
| 11.3   | Wat is de hoogste opleiding die u heeft afgemaakt (Zoek uw hoogste opleiding en kruis het hokje daarvoor aan)?                                                                                                                                                                         | <input type="checkbox"/> Ik heb geen school of opleiding afgemaakt<br><input type="checkbox"/> Lagere school of basisschool<br><input type="checkbox"/> Huishoudschool, vbo, lbo, lts, leao of lhno<br><input type="checkbox"/> Mavo, mulo, ivo of vmbo<br><input type="checkbox"/> Mbo, mts, meao, mhno, inas of intas<br><input type="checkbox"/> Havo, vwo, hbs, mms, atheneum of gymnasium<br><input type="checkbox"/> Hbo, hts, heao of hhno<br><input type="checkbox"/> Universiteit<br><input type="checkbox"/> Ik heb een andere opleiding afgemaakt, namelijk |
| 11.3.1 | <p><b><i>If 'Wat is de hoogste opleiding die u heeft afgemaakt (Zoek uw hoogste opleiding en kruis het hokje daarvoor aan)?' is equal to 'Ik heb een andere opleiding afgemaakt, namelijk' answer this question:</i></b></p> <p>Wat is de hoogste opleiding die u heeft afgemaakt?</p> | <input type="text"/>                                                                                                                                                                                                                                                                                                                                                                                                                                                                                                                                                   |

|          |                                                                                                                                                                                                                                                                   |                                                                                                                                                                                                                                                                                                                                                                                                                                                  |
|----------|-------------------------------------------------------------------------------------------------------------------------------------------------------------------------------------------------------------------------------------------------------------------|--------------------------------------------------------------------------------------------------------------------------------------------------------------------------------------------------------------------------------------------------------------------------------------------------------------------------------------------------------------------------------------------------------------------------------------------------|
| 11.4     | Wat doet u in het dagelijks leven?                                                                                                                                                                                                                                | <input type="checkbox"/> Ik zit op school, ik studeer<br><input type="checkbox"/> Ik werk in loondienst<br><input type="checkbox"/> Ik ben zelfstandig ondernemer<br><input type="checkbox"/> Ik ben huisvrouw, huisman<br><input type="checkbox"/> Ik ben werkloos<br><input type="checkbox"/> Ik ben arbeidsongeschikt<br><input type="checkbox"/> Ik ben met pensioen of prepensioen<br><input type="checkbox"/> Ik doe iets anders, namelijk |
| 11.4.1   | <b>If 'Wat doet u in het dagelijks leven?' is equal to 'Ik ben arbeidsongeschikt' answer this question:</b><br>Wat doet u in het dagelijks leven?                                                                                                                 | <input type="text"/>                                                                                                                                                                                                                                                                                                                                                                                                                             |
| 11.4.2   | <b>If 'Wat doet u in het dagelijks leven?' is equal to 'Ik doe iets anders, namelijk' answer this question:</b><br>Wat doet u in het dagelijks leven?                                                                                                             | <input type="text"/>                                                                                                                                                                                                                                                                                                                                                                                                                             |
| 11.5     | Hebt u betaald werk?                                                                                                                                                                                                                                              | <input type="radio"/> Nee<br><input type="radio"/> Ja                                                                                                                                                                                                                                                                                                                                                                                            |
| 11.5.1   | <b>If 'Hebt u betaald werk?' is equal to 'Ja' answer this question:</b><br>Wat is uw beroep?                                                                                                                                                                      | <input type="text"/>                                                                                                                                                                                                                                                                                                                                                                                                                             |
| 11.5.2   | <b>If 'Hebt u betaald werk?' is equal to 'Ja' answer this question:</b><br>Hoeveel uur per week werkt u (Tel alleen de uren waarvoor u betaald wordt)?                                                                                                            | <input type="text"/> uren                                                                                                                                                                                                                                                                                                                                                                                                                        |
| 11.5.3   | <b>If 'Hebt u betaald werk?' is equal to 'Ja' answer this question:</b><br>Hoeveel dagen in de week werkt u?                                                                                                                                                      | <input type="text"/> Dagen                                                                                                                                                                                                                                                                                                                                                                                                                       |
| 11.5.4   | <b>If 'Hebt u betaald werk?' is equal to 'Ja' answer this question:</b><br>Bent u in de afgelopen 4 weken afwezig geweest van uw werk omdat u ziek was?                                                                                                           | <input type="radio"/> Nee<br><input type="radio"/> Ja                                                                                                                                                                                                                                                                                                                                                                                            |
| 11.5.4.1 | <b>If 'Bent u in de afgelopen 4 weken afwezig geweest van uw werk omdat u ziek was?' is equal to 'Ja' answer this question:</b><br>Bent u in de afgelopen 4 weken afwezig geweest van uw werk omdat u ziek was (Tel alleen de werkdagen in de afgelopen 4 weken)? | <input type="text"/> dagen afwezig geweest                                                                                                                                                                                                                                                                                                                                                                                                       |
| 11.5.4.2 | <b>If 'Bent u in de afgelopen 4 weken afwezig geweest van uw werk omdat u ziek was?' is equal to 'Ja' answer this question:</b><br>Was u langer dan de gehele periode van 4 weken afwezig van uw werk doordat u ziek was?                                         | <input type="radio"/> Nee<br><input type="radio"/> Ja                                                                                                                                                                                                                                                                                                                                                                                            |

|            |                                                                                                                                                                                                                                                                                                                                                                                                                 |                                                                                       |
|------------|-----------------------------------------------------------------------------------------------------------------------------------------------------------------------------------------------------------------------------------------------------------------------------------------------------------------------------------------------------------------------------------------------------------------|---------------------------------------------------------------------------------------|
| 11.5.4.2.1 | <b>If 'Was u langer dan de gehele periode van 4 weken afwezig van uw werk doordat u ziek was?' is equal to 'Ja' answer this question:</b><br>Wanneer heeft u zich ziek gemeld?                                                                                                                                                                                                                                  | <input type="text"/> <input type="text"/> <input type="text"/> (dd-mm-yyyy)           |
| 11.5.5     | <b>If 'Hebt u betaald werk?' is equal to 'Ja' answer this question:</b><br>Waren er in de afgelopen 4 weken, dagen waarop u wel gewerkt heeft, maar tijdens uw werk last had van lichamelijke of psychische problemen?                                                                                                                                                                                          | <input type="radio"/> Ja<br><input type="radio"/> Nee                                 |
| 11.5.5.1   | <b>If 'Waren er in de afgelopen 4 weken, dagen waarop u wel gewerkt heeft, maar tijdens uw werk last had van lichamelijke of psychische problemen?' is equal to 'Ja' answer this question:</b><br>Op hoeveel werkdagen had u tijdens uw werk last van uw lichamelijke of psychische problemen?                                                                                                                  | <input type="text"/> werkdagen                                                        |
| 11.5.5.2   | <b>If 'Waren er in de afgelopen 4 weken, dagen waarop u wel gewerkt heeft, maar tijdens uw werk last had van lichamelijke of psychische problemen?' is equal to 'Ja' answer this question:</b><br>Op de dagen dat u last had, kon u misschien niet zoveel werk doen als normaal. Hoeveel werk kon u op deze dagen gemiddeld doen?                                                                               | Ik kon op deze dagen niks doen (0.00)      Ik kon net zoveel doen als normaal (10.00) |
| 11.6       | Waren er dagen waarop u minder onbetaald werk kon doen door uw lichamelijke of psychische problemen?                                                                                                                                                                                                                                                                                                            | <input type="radio"/> Nee<br><input type="radio"/> Ja                                 |
| 11.6.1     | <b>If 'Waren er dagen waarop u minder onbetaald werk kon doen door uw lichamelijke of psychische problemen?' is equal to 'Ja' answer this question:</b><br>Op hoeveel dagen was dit zo?                                                                                                                                                                                                                         | <input type="text"/> Dagen                                                            |
| 11.6.2     | <b>If 'Waren er dagen waarop u minder onbetaald werk kon doen door uw lichamelijke of psychische problemen?' is equal to 'Ja' answer this question:</b><br>Stel dat iemand, bijvoorbeeld uw partner, familielid of een bekende, u op deze dagen had geholpen. En al het onbetaalde werk wat u niet kon doen, voor u had gedaan. Hoeveel uur was die persoon hier op deze dagen dan gemiddeld mee bezig geweest? | <input type="text"/> uur op deze dagen                                                |

## Vragenlijst PRIMA studie 12 weken - PRODISQ - Zorggebruik

| Number | Question | Answers |
|--------|----------|---------|
|--------|----------|---------|

Wij willen graag weten met welke dokters u in de afgelopen 3 maanden een afspraak had. Het gaat om afspraken voor uzelf. Ook andere zorgverleners tellen mee. Bijvoorbeeld de fysiotherapeut.

|        |                                                                                                                                                                                                                          |                                                       |
|--------|--------------------------------------------------------------------------------------------------------------------------------------------------------------------------------------------------------------------------|-------------------------------------------------------|
| 12.1   | Bent u in de afgelopen 3 maanden naar uw huisarts geweest?                                                                                                                                                               | <input type="radio"/> Nee<br><input type="radio"/> Ja |
| 12.1.1 | <b>If 'Bent u in de afgelopen 3 maanden naar uw huisarts geweest?' is equal to 'Ja' answer this question:</b><br>Hoeveel afspraken had u?                                                                                | <input type="text"/> afspraken                        |
| 12.2   | Bent u in de afgelopen 3 maanden in contact geweest met een maatschappelijk werker?                                                                                                                                      | <input type="radio"/> Nee<br><input type="radio"/> Ja |
| 12.2.1 | <b>If 'Bent u in de afgelopen 3 maanden in contact geweest met een maatschappelijk werker?' is equal to 'Ja' answer this question:</b><br>Hoeveel afspraken had u?                                                       | <input type="text"/> afspraken                        |
| 12.3   | Bent u in de afgelopen 3 maanden naar een fysiotherapeut geweest? Of een caesartherapeut, therapeut mensendieck of een manueel therapeut?                                                                                | <input type="radio"/> Nee<br><input type="radio"/> Ja |
| 12.3.1 | <b>If 'Bent u in de afgelopen 3 maanden naar een fysiotherapeut geweest? Of een caesartherapeut, therapeut mensendieck of een manueel therapeut?' is equal to 'Ja' answer this question:</b><br>Hoeveel afspraken had u? | <input type="text"/> afspraken                        |
| 12.4   | Bent u in de afgelopen 3 maanden naar een ergotherapeut geweest?                                                                                                                                                         | <input type="radio"/> Nee<br><input type="radio"/> Ja |
| 12.4.1 | <b>If 'Bent u in de afgelopen 3 maanden naar een ergotherapeut geweest?' is equal to 'Ja' answer this question:</b><br>Hoeveel afspraken had u?                                                                          | <input type="text"/> afspraken                        |
| 12.5   | Bent u in de afgelopen 3 maanden naar een logopedist geweest?                                                                                                                                                            | <input type="radio"/> Nee<br><input type="radio"/> Ja |
| 12.5.1 | <b>If 'Bent u in de afgelopen 3 maanden naar een logopedist geweest?' is equal to 'Ja' answer this question:</b><br>Hoeveel afspraken had u?                                                                             | <input type="text"/> afspraken                        |
| 12.6   | Bent u in de afgelopen 3 maanden naar een diëtist geweest?                                                                                                                                                               | <input type="radio"/> Nee<br><input type="radio"/> Ja |
| 12.6.1 | <b>If 'Bent u in de afgelopen 3 maanden naar een diëtist geweest?' is equal to 'Ja' answer this question:</b><br>Hoeveel afspraken had u?                                                                                | <input type="text"/> afspraken                        |

|           |                                                                                                                                                                                                                                                                           |                                                                                                                                                                                                                                                                                                     |
|-----------|---------------------------------------------------------------------------------------------------------------------------------------------------------------------------------------------------------------------------------------------------------------------------|-----------------------------------------------------------------------------------------------------------------------------------------------------------------------------------------------------------------------------------------------------------------------------------------------------|
| 12.7      | Bent u in de afgelopen 3 maanden naar een homeopaat geweest? Of een acupuncturist?                                                                                                                                                                                        | <input type="radio"/> Nee<br><input type="radio"/> Ja                                                                                                                                                                                                                                               |
| 12.7.1    | <b>If 'Bent u in de afgelopen 3 maanden naar een homeopaat geweest? Of een acupuncturist?' is equal to 'Ja' answer this question:</b><br>Hoeveel afspraken had u?                                                                                                         | <input type="text"/> afspraken                                                                                                                                                                                                                                                                      |
| 12.8      | Bent u in de afgelopen 3 maanden naar een psycholoog geweest? Of een psychotherapeut of psychiater?                                                                                                                                                                       | <input type="radio"/> Nee<br><input type="radio"/> Ja                                                                                                                                                                                                                                               |
| 12.8.1    | <b>If 'Bent u in de afgelopen 3 maanden naar een psycholoog geweest? Of een psychotherapeut of psychiater?' is equal to 'Ja' answer this question:</b><br>Hoeveel afspraken had u?                                                                                        | <input type="text"/> afspraken                                                                                                                                                                                                                                                                      |
| 12.9      | Heeft u in de afgelopen 3 maanden afspraken gehad met de bedrijfsarts?                                                                                                                                                                                                    | <input type="radio"/> Nee<br><input type="radio"/> Ja                                                                                                                                                                                                                                               |
| 12.9.1    | <b>If 'Heeft u in de afgelopen 3 maanden afspraken gehad met de bedrijfsarts?' is equal to 'Ja' answer this question:</b><br>Hoeveel afspraken had u?                                                                                                                     | <input type="text"/> afspraken                                                                                                                                                                                                                                                                      |
| 12.10     | Heeft u in de afgelopen 3 maanden hulp van de thuiszorg gehad?                                                                                                                                                                                                            | <input type="radio"/> Ja<br><input type="radio"/> Nee                                                                                                                                                                                                                                               |
| 12.10.1   | <b>If 'Heeft u in de afgelopen 3 maanden hulp van de thuiszorg gehad?' is equal to 'Ja' answer this question:</b><br>Wat voor hulp van de thuiszorg heeft u gehad in de afgelopen 3 maanden?                                                                              | <input type="checkbox"/> Huishoudelijke hulp; voorbeeld: stofzuigen, bed opmaken, boodschappen doen<br><input type="checkbox"/> Verzorging van uzelf; voorbeeld: hulp bij douchen of aankleden<br><input type="checkbox"/> Verpleging; voorbeeld: verband omdoen, medicijnen geven, bloeddruk meten |
| 12.10.1.1 | <b>If 'Wat voor hulp van de thuiszorg heeft u gehad in de afgelopen 3 maanden?' is equal to 'Huishoudelijke hulp; voorbeeld: stofzuigen, bed opmaken, boodschappen doen' answer this question:</b><br>Hoeveel weken heeft u deze thuiszorg gehad?<br>Huishoudelijke hulp: | <input type="text"/> weken in de afgelopen 3 maanden                                                                                                                                                                                                                                                |
| 12.10.1.2 | <b>If 'Wat voor hulp van de thuiszorg heeft u gehad in de afgelopen 3 maanden?' is equal to 'Verzorging van uzelf; voorbeeld: hulp bij douchen of aankleden' answer this question:</b><br>Hoeveel weken heeft u deze thuiszorg gehad?<br>Verzorging van uzelf:            | <input type="text"/> weken in de afgelopen 3 maanden                                                                                                                                                                                                                                                |

- 12.10.1.3 **If 'Wat voor hulp van de thuiszorg heeft u gehad in de afgelopen 3 maanden?' is equal to 'Verpleging; voorbeeld: verband omdoen, medicijnen geven, bloeddruk meten' answer this question:**  
Hoeveel weken heeft u deze thuiszorg gehad?  
Verpleging:  weken in de afgelopen 3 maanden
- 12.10.1.4 **If 'Wat voor hulp van de thuiszorg heeft u gehad in de afgelopen 3 maanden?' is equal to 'Huishoudelijke hulp; voorbeeld: stofzuigen, bed opmaken, boodschappen doen' answer this question:**  
Hoeveel uur thuiszorg kreeg u in deze weken gemiddeld? Huishoudelijke hulp: gemiddeld  uur in de week
- 12.10.1.5 **If 'Wat voor hulp van de thuiszorg heeft u gehad in de afgelopen 3 maanden?' is equal to 'Verzorging van uzelf; voorbeeld: hulp bij douchen of aankleden' answer this question:**  
Hoeveel uur thuiszorg kreeg u in deze weken gemiddeld? Verzorging van uzelf: gemiddeld  uur in de week
- 12.10.1.6 **If 'Wat voor hulp van de thuiszorg heeft u gehad in de afgelopen 3 maanden?' is equal to 'Verpleging; voorbeeld: verband omdoen, medicijnen geven, bloeddruk meten' answer this question:**  
Hoeveel uur thuiszorg kreeg u in deze weken gemiddeld? Verpleging: gemiddeld  uur in de week
- 12.11 Heeft u in de afgelopen 3 maanden medicijnen gebruikt?  Ja  Nee
- 12.11.1 **If 'Heeft u in de afgelopen 3 maanden medicijnen gebruikt?' is equal to 'Ja' answer this question:**  
Welke medicijnen heeft u in de afgelopen 3 maanden gebruikt?
- 12.12 Bent u in de afgelopen 3 maanden op de spoedeisende eerste hulp van een ziekenhuis geweest? (Een andere naam voor spoedeisende eerste hulp is EHBO)  Nee  Ja
- 12.12.1 **If 'Bent u in de afgelopen 3 maanden op de spoedeisende eerste hulp van een ziekenhuis geweest? (Een andere naam voor spoedeisende eerste hulp is EHBO)' is equal to 'Ja' answer this question:**  
Hoe vaak bent u geweest?  keer
- 12.13 Bent u in de afgelopen 3 maanden met een ambulance naar het ziekenhuis gebracht? (Een andere naam voor ambulance is ziekenauto)  Nee  Ja



|         |                                                                                                                                                                                                                                                                                                                                                           |                                                                                                                                                                                                             |
|---------|-----------------------------------------------------------------------------------------------------------------------------------------------------------------------------------------------------------------------------------------------------------------------------------------------------------------------------------------------------------|-------------------------------------------------------------------------------------------------------------------------------------------------------------------------------------------------------------|
| 12.13.1 | <b>If 'Bent u in de afgelopen 3 maanden met een ambulance naar het ziekenhuis gebracht? (Een andere naam voor ambulance is ziekenauto)' is equal to 'Ja' answer this question:</b><br>Hoe vaak bent u naar het ziekenhuis gebracht?                                                                                                                       | <input type="text"/> keer                                                                                                                                                                                   |
| 12.14   | Had u in de afgelopen 3 maanden een afspraak bij de polikliniek van het ziekenhuis? (Het gaat om afspraken voor uzelf met een dokter. Bijvoorbeeld met de cardioloog, reumatoloog of neuroloog)                                                                                                                                                           | <input type="radio"/> Ja<br><input type="radio"/> Nee                                                                                                                                                       |
| 12.14.1 | <b>If 'Had u in de afgelopen 3 maanden een afspraak bij de polikliniek van het ziekenhuis? (Het gaat om afspraken voor uzelf met een dokter. Bijvoorbeeld met de cardioloog, reumatoloog of neuroloog)' is equal to 'Ja' answer this question:</b><br>Bij welke soorten dokters bent u in de afgelopen 3 maanden in het ziekenhuis geweest? En hoe vaak?  | <input type="text"/>                                                                                                                                                                                        |
| 12.15   | Bent u in de afgelopen 3 maanden overdag in het ziekenhuis geweest voor een behandeling? (U bleef dus niet slapen. U kwam bijvoorbeeld voor een bloedtransfusie, nierdialyse of chemokuur)                                                                                                                                                                | <input type="radio"/> Ja<br><input type="radio"/> Nee                                                                                                                                                       |
| 12.15.1 | <b>If 'Bent u in de afgelopen 3 maanden overdag in het ziekenhuis geweest voor een behandeling? (U bleef dus niet slapen. U kwam bijvoorbeeld voor een bloedtransfusie, nierdialyse of chemokuur)' is equal to 'Ja' answer this question:</b><br>Voor welke soort behandeling was dit?                                                                    | <input type="text"/>                                                                                                                                                                                        |
| 12.15.2 | <b>If 'Bent u in de afgelopen 3 maanden overdag in het ziekenhuis geweest voor een behandeling? (U bleef dus niet slapen. U kwam bijvoorbeeld voor een bloedtransfusie, nierdialyse of chemokuur)' is equal to 'Ja' answer this question:</b><br>Hoeveel keer moest u in de afgelopen 3 maanden voor deze behandelingen naar het ziekenhuis?              | <input type="text"/>                                                                                                                                                                                        |
| 12.16   | Bent u in de afgelopen 3 maanden ergens anders geweest voor een behandeling overdag? (U bleef dus niet slapen. U ging bijvoorbeeld naar de dagopvang van een woon-/zorgcentrum of een psychiatrische instelling. Of naar de dagbehandeling van een revalidatiecentrum)                                                                                    | <input type="radio"/> Ja<br><input type="radio"/> Nee                                                                                                                                                       |
| 12.16.1 | <b>If 'Bent u in de afgelopen 3 maanden ergens anders geweest voor een behandeling overdag? (U bleef dus niet slapen. U ging bijvoorbeeld naar de dagopvang van een woon-/zorgcentrum of een psychiatrische instelling. Of naar de dagbehandeling van een revalidatiecentrum)' is equal to 'Ja' answer this question:</b><br>Wat voor instelling was dit? | <input type="checkbox"/> Woon-/zorgcentrum<br><input type="checkbox"/> Revalidatiecentrum<br><input type="checkbox"/> Psychiatrische instelling<br><input type="checkbox"/> Een andere instelling, namelijk |

|           |                                                                                                                                                                                                                                                                                                 |                                                       |
|-----------|-------------------------------------------------------------------------------------------------------------------------------------------------------------------------------------------------------------------------------------------------------------------------------------------------|-------------------------------------------------------|
| 12.16.1.1 | <b>If 'Wat voor instelling was dit?' is equal to 'Een andere instelling, namelijk' answer this question:</b><br>Wat voor instelling was dit?                                                                                                                                                    | <input type="text"/>                                  |
| 12.16.1.2 | <b>If 'Wat voor instelling was dit?' is equal to 'Woon-/zorgcentrum' answer this question:</b><br>Hoe vaak moest u hier in de afgelopen 3 maanden naartoe? Naar het woon-/zorgcentrum:                                                                                                          | <input type="text"/> keer in de afgelopen 3 maanden   |
| 12.16.1.3 | <b>If 'Wat voor instelling was dit?' is equal to 'Revalidatiecentrum' answer this question:</b><br>Hoe vaak moest u hier in de afgelopen 3 maanden naartoe? Naar het revalidatiecentrum:                                                                                                        | <input type="text"/> keer in de afgelopen 3 maanden   |
| 12.16.1.4 | <b>If 'Wat voor instelling was dit?' is equal to 'Psychiatrische instelling' answer this question:</b><br>Hoe vaak moest u hier in de afgelopen 3 maanden naartoe? Naar de psychiatrische instelling:                                                                                           | <input type="text"/> keer in de afgelopen 3 maanden   |
| 12.16.1.5 | <b>If 'Wat voor instelling was dit?' is equal to 'Een andere instelling, namelijk' answer this question:</b><br>Hoe vaak moest u hier in de afgelopen 3 maanden naartoe? Naar de andere instelling:                                                                                             | <input type="text"/> keer in de afgelopen 3 maanden   |
| 12.17     | Heeft u in de afgelopen 3 maanden weleens in het ziekenhuis gelegen? (U moest dus blijven slapen. Bijvoorbeeld omdat u geopereerd was en niet meteen naar huis kon)                                                                                                                             | <input type="radio"/> Ja<br><input type="radio"/> Nee |
| 12.17.1   | <b>If 'Heeft u in de afgelopen 3 maanden weleens in het ziekenhuis gelegen? (U moest dus blijven slapen. Bijvoorbeeld omdat u geopereerd was en niet meteen naar huis kon)' is equal to 'Ja' answer this question:</b><br>Hoe vaak heeft u in de afgelopen 3 maanden in het ziekenhuis gelegen? | <input type="text"/> keer in de afgelopen 3 maanden   |
| 12.17.2   | <b>If 'Heeft u in de afgelopen 3 maanden weleens in het ziekenhuis gelegen? (U moest dus blijven slapen. Bijvoorbeeld omdat u geopereerd was en niet meteen naar huis kon)' is equal to 'Ja' answer this question:</b><br>Hoe lang heeft u in het ziekenhuis gelegen?                           | <input type="text"/> dagen in de afgelopen 3 maanden  |
| 12.18     | Moest u in de afgelopen 3 maanden ergens anders blijven slapen voor uw gezondheid? (Bijvoorbeeld in een woon-/zorgcentrum, psychiatrische instelling of revalidatiecentrum)                                                                                                                     | <input type="radio"/> Ja<br><input type="radio"/> Nee |

|           |                                                                                                                                                                                                                                                                                      |                                                                                                                                                                                                                                                                                                                                                                                                                                                                                                                                                                 |
|-----------|--------------------------------------------------------------------------------------------------------------------------------------------------------------------------------------------------------------------------------------------------------------------------------------|-----------------------------------------------------------------------------------------------------------------------------------------------------------------------------------------------------------------------------------------------------------------------------------------------------------------------------------------------------------------------------------------------------------------------------------------------------------------------------------------------------------------------------------------------------------------|
| 12.18.1   | <p><b>If 'Moest u in de afgelopen 3 maanden ergens anders blijven slapen voor uw gezondheid? (Bijvoorbeeld in een woon-/zorgcentrum, psychiatrische instelling of revalidatiecentrum)' is equal to 'Ja' answer this question:</b><br/>Wat voor instelling was dit?</p>               | <input type="checkbox"/> Woon-/zorgcentrum<br><input type="checkbox"/> Revalidatiecentrum<br><input type="checkbox"/> Psychiatrische instelling<br><input type="checkbox"/> Een andere instelling, namelijk                                                                                                                                                                                                                                                                                                                                                     |
| 12.18.1.1 | <p><b>If 'Wat voor instelling was dit?' is equal to 'Een andere instelling, namelijk' answer this question:</b><br/>Een andere instelling, namelijk</p>                                                                                                                              | <div style="border: 1px dashed black; height: 40px; width: 100%;"></div>                                                                                                                                                                                                                                                                                                                                                                                                                                                                                        |
| 12.18.1.2 | <p><b>If 'Wat voor instelling was dit?' is equal to 'Woon-/zorgcentrum' answer this question:</b><br/>Hoe lang bent u in deze instelling geweest? In het woon-/zorgcentrum:</p>                                                                                                      | <div style="border: 1px dashed black; width: 100%;"></div> dagen in de afgelopen 3 maanden                                                                                                                                                                                                                                                                                                                                                                                                                                                                      |
| 12.18.1.3 | <p><b>If 'Wat voor instelling was dit?' is equal to 'Revalidatiecentrum' answer this question:</b><br/>Hoe lang bent u in deze instelling geweest? In het revalidatiecentrum:</p>                                                                                                    | <div style="border: 1px dashed black; width: 100%;"></div> dagen in de afgelopen 3 maanden                                                                                                                                                                                                                                                                                                                                                                                                                                                                      |
| 12.18.1.4 | <p><b>If 'Wat voor instelling was dit?' is equal to 'Psychiatrische instelling' answer this question:</b><br/>Hoe lang bent u in deze instelling geweest? In de psychiatrische instelling:</p>                                                                                       | <div style="border: 1px dashed black; width: 100%;"></div> dagen in de afgelopen 3 maanden                                                                                                                                                                                                                                                                                                                                                                                                                                                                      |
| 12.18.1.5 | <p><b>If 'Wat voor instelling was dit?' is equal to 'Een andere instelling, namelijk' answer this question:</b><br/>Hoe lang bent u in deze instelling geweest? In de andere instelling:</p>                                                                                         | <div style="border: 1px dashed black; width: 100%;"></div> dagen in de afgelopen 3 maanden                                                                                                                                                                                                                                                                                                                                                                                                                                                                      |
| 12.19     | <p>Heeft u in de afgelopen 3 maanden hulp gekregen van een familielid of een bekende vanwege uw lichamelijke of psychische problemen?</p>                                                                                                                                            | <input type="radio"/> Ja<br><input type="radio"/> Nee                                                                                                                                                                                                                                                                                                                                                                                                                                                                                                           |
| 12.19.1   | <p><b>If 'Heeft u in de afgelopen 3 maanden hulp gekregen van een familielid of een bekende vanwege uw lichamelijke of psychische problemen?' is equal to 'Ja' answer this question:</b><br/>Wat voor hulp van familieleden of bekenden heeft u gehad in de afgelopen 3 maanden?</p> | <input type="checkbox"/> Huishoudelijke hulp - voorbeeld: stofzuigen, bed opmaken, boodschappen doen, klaarmaken van eten en drinken, verzorgen van kinderen<br><input type="checkbox"/> Verzorging van uzelf - voorbeeld: hulp bij douchen of aankleden, hulp bij het eten en drinken of het geven van medicijnen<br><input type="checkbox"/> Praktische hulp - voorbeeld: ondersteuning bij wandelen, het maken van uitstapjes of bezoeken aan bekenden, bezoeken aan de huisarts of het ziekenhuis, het regelen van hulp of het regelen van financiële zaken |

12.19.1.1 **If 'Wat voor hulp van familieleden of bekenden heeft u gehad in de afgelopen 3 maanden?' is equal to 'Huishoudelijke hulp - voorbeeld: stofzuigen, bed opmaken, boodschappen doen, klaarmaken van eten en drinken, verzorgen van kinderen' answer this question:**  
Hoeveel weken heeft u deze hulp gehad?  
Huishoudelijke hulp:

weken in de afgelopen 3 maanden

12.19.1.2 **If 'Wat voor hulp van familieleden of bekenden heeft u gehad in de afgelopen 3 maanden?' is equal to 'Verzorging van uzelf - voorbeeld: hulp bij douchen of aankleden, hulp bij het eten en drinken of het geven van medicijnen' answer this question:**  
Hoeveel weken heeft u deze hulp gehad? Verzorging van uzelf:

weken in de afgelopen 3 maanden

12.19.1.3 **If 'Wat voor hulp van familieleden of bekenden heeft u gehad in de afgelopen 3 maanden?' is equal to 'Praktische hulp - voorbeeld: ondersteuning bij wandelen, het maken van uitstapjes of bezoeken aan bekenden, bezoeken aan de huisarts of het ziekenhuis, het regelen van hulp of het regelen van financiële zaken' answer this question:**  
Hoeveel uur hulp kreeg u in deze weken gemiddeld?  
Praktische hulp:

weken in de afgelopen 3 maanden

12.19.1.4 **If 'Wat voor hulp van familieleden of bekenden heeft u gehad in de afgelopen 3 maanden?' is equal to 'Huishoudelijke hulp - voorbeeld: stofzuigen, bed opmaken, boodschappen doen, klaarmaken van eten en drinken, verzorgen van kinderen' answer this question:**  
Hoeveel uur hulp kreeg u in deze weken gemiddeld?  
Huishoudelijke hulp: gemiddeld

uur in de week

12.19.1.5 **If 'Wat voor hulp van familieleden of bekenden heeft u gehad in de afgelopen 3 maanden?' is equal to 'Verzorging van uzelf - voorbeeld: hulp bij douchen of aankleden, hulp bij het eten en drinken of het geven van medicijnen' answer this question:**  
Hoeveel uur hulp kreeg u in deze weken gemiddeld?  
Verzorging van uzelf: gemiddeld

uur in de week

12.19.1.6 **If 'Wat voor hulp van familieleden of bekenden heeft u gehad in de afgelopen 3 maanden?' is equal to 'Praktische hulp - voorbeeld: ondersteuning bij wandelen, het maken van uitstapjes of bezoeken aan bekenden, bezoeken aan de huisarts of het ziekenhuis, het regelen van hulp of het regelen van financiële zaken' answer this question:**  
Hoeveel uur hulp kreeg u in deze weken gemiddeld?  
Praktische hulp: gemiddeld

uur in de week

## Vragenlijst PRIMA studie 12 weken - Dank

| Number | Question                                                                                                                                      | Answers                                                                  |
|--------|-----------------------------------------------------------------------------------------------------------------------------------------------|--------------------------------------------------------------------------|
| 13.1   | Hartelijk dank voor de tijd die u heeft genomen om de vragenlijsten in te vullen. Indien u nog opmerkingen heeft kunt u deze hierin plaatsen. | <div style="border: 1px dashed black; width: 100%; height: 50px;"></div> |

## Survey 'Vragenlijst PRIMA studie 26 weken'

### Vragenlijst PRIMA studie 26 weken - AOFAS - Pijn

| Number | Question                            | Answers                                                                                                                                                                                                         |
|--------|-------------------------------------|-----------------------------------------------------------------------------------------------------------------------------------------------------------------------------------------------------------------|
| 1.1    | Hoeveel pijn ervaart u aan uw voet? | <input type="checkbox"/> Geen<br><input type="checkbox"/> Milde pijnklachten of af en toe pijn<br><input type="checkbox"/> Matige pijnklachten, dagelijks<br><input type="checkbox"/> Vrijwel continu erge pijn |

### Vragenlijst PRIMA studie 26 weken - AOFAS resterende gedeelte

| Number | Question                                              | Answers                                                                                                                                                                                                                                                                                                                                                                                                                                              |
|--------|-------------------------------------------------------|------------------------------------------------------------------------------------------------------------------------------------------------------------------------------------------------------------------------------------------------------------------------------------------------------------------------------------------------------------------------------------------------------------------------------------------------------|
| 2.1    | Hoeveel beperkingen in het dagelijks leven ervaart u? | <input type="radio"/> Geen beperkingen, geen hulpmiddelen nodig<br><input type="radio"/> Geen beperkingen in algemeen dagelijkse bezigheden, wel beperkingen in recreatieve activiteiten (sport, hobbies, etc) geen ondersteuning<br><input type="radio"/> Beperkingen bij dagelijkse- en recreatieve activiteiten, stok<br><input type="radio"/> Ernstige beperkingen bij dagelijkse- en recreatieve activiteiten, walker, krukken, rolstoel, brace |

---

|     |                                                                                                                            |                                                                                                                                                                                                                                                                                                             |
|-----|----------------------------------------------------------------------------------------------------------------------------|-------------------------------------------------------------------------------------------------------------------------------------------------------------------------------------------------------------------------------------------------------------------------------------------------------------|
| 2.2 | Wat is de afstand die u in één keer kunt lopen?                                                                            | <input type="radio"/> Meer dan 600 meter<br><input type="radio"/> 400 - 600 meter<br><input type="radio"/> 100 - 300 meter<br><input type="radio"/> Minder dan 100 meter                                                                                                                                    |
| 2.3 | Heeft u moeite met lopen op een bepaalde ondergrond?                                                                       | <input type="radio"/> Geen problemen bij lopen<br><input type="radio"/> Enig problemen op ongelijke ondergrond, trap, helling, ladders<br><input type="radio"/> Ernstige problemen bij ongelijke ondergrond, trap, helling, ladders                                                                         |
| 2.4 | Hoe zou u uw looppatroon beoordelen?                                                                                       | <input type="radio"/> Normaal of minimaal afwijkend<br><input type="radio"/> Duidelijk<br><input type="radio"/> Ernstig                                                                                                                                                                                     |
| 2.5 | Hoe zou u de beweeglijkheid van uw voet beoordelen ten opzichte van de andere zijde of ten opzichte van vóór het ongeval?  | <input type="radio"/> Hetzelfde of licht beperkt t.o.v. de niet aangedane zijde of zoals voor het ongeval<br><input type="radio"/> Ongeveer de helft beperkt<br><input type="radio"/> Sterk verminderd, bijna geen bewegingen mogelijk                                                                      |
| 2.6 | Hoe zou u de beweeglijkheid van uw enkel beoordelen ten opzichte van de andere zijde of ten opzichte van voor het ongeval? | <input type="radio"/> Hetzelfde of licht beperkt t.o.v. de niet aangedane zijde of zoals voor het ongeval<br><input type="radio"/> Ongeveer de helft beperkt<br><input type="radio"/> Sterk verminderd, bijna geen bewegingen mogelijk                                                                      |
| 2.7 | Hoe zou u de stabiliteit van uw voet en enkel beoordelen                                                                   | <input type="radio"/> Stabiel, ik verzwik mijn enkel hooguit incidenteel<br><input type="radio"/> Niet stabiel, ik verzwik mijn enkel vaak                                                                                                                                                                  |
| 2.8 | Hoe zou u de stand van uw voet beoordelen ten opzichte van de andere zijde of ten opzichte van voor het ongeval?           | <input type="radio"/> Goed, ik kan mijn voet goed plat op de grond zetten, waarbij de stand niet afwijkend is<br><input type="radio"/> Ik sta vrijwel alleen op de buitenzijde van mijn voet<br><input type="radio"/> Ik kan mijn voet niet plat op de grond zetten en loop vrijwel alleen op mijn voorvoet |

---

## Vragenlijst PRIMA studie 26 weken - VAS Pain score

| Number | Question                                                                                                                                                             | Answers             |
|--------|----------------------------------------------------------------------------------------------------------------------------------------------------------------------|---------------------|
| 3.1    | VAS pijnscore (Geef uw minimaal pijnscore aan tijdens dagelijkse activiteiten op een schaal van 0 tot 100, waarbij 0 geen pijn is en 100 de ergste pijn denkbaar is) | (0.00) 100 (100.00) |

## Vragenlijst PRIMA studie 26 weken - AAS

| Number | Question | Answers |
|--------|----------|---------|
|--------|----------|---------|

- 
- 4.1      Wat is het meest bij u van toepassing ten aanzien van uw activiteit?
- American Football
  - Basketbal
  - Gymnastiek/turnen
  - Handbal
  - Rugby
  - Voetbal
  - Hockey
  - Korfbal
  - Gevechtssporten: judo, karate, kung fu, taekwando, jiu jitsu, etc.
  - Oriëntatiewandelen
  - Rhythmische gymnastiek
  - Volleybal
  - Boxen
  - Freestyle snowboarden
  - Ijshockey
  - Tennis
  - Worstelen
  - Fitness, aerobics
  - Badminton
  - Baseball
  - Cross-country hardlopen
  - Moderne pentathlon
  - Squash
  - Surfen, windsurfen
  - Tafel tennis
  - Atletiek: spring-, werponderdelen
  - Waterskieuwen
  - Dans
  - Schermen
  - Zaalhockey
  - Bergbeklimmen
  - Langlauf
  - Parachute springen
  - Softball
  - Speciale beroepen en werkactiviteiten; speciale beroepen: ballet, professioneel soldaat, speciale reddingswerker, stuntman, etc.
  - Duiken
  - Scubaduiken
  - Skaten, in-line skaten
  - Atletiek: looponderdelen
  - Triatlon
  - Gewichtsheffen, body-building
-



- Alle competitieve sporten hieronder met 'seasonal' conditioning
- Zwaar fysiek werk
- Alpine skiën en snowboarden
- Bowlen/curlen
- Golf
- Mountainbike/BMX
- Powerliften
- Zeilen
- Fysiek werk
- Wielrennen
- Paardrijden
- Motorsporten/technische sporten
- Roeien, kayakken
- Boogschieten
- Water polo en zwemmen
- Kunnen lopen op oneven grond
- Geen sport, echter geen limitatie in dagelijkse activiteiten
- Kunnen lopen op even grond, maar de dagelijkse activiteiten zijn gelimiteerd
- Niet kunnen lopen, fysieke handicap wegens enkelproblemen

---

4.1.1 ***If 'Wat is het meest bij u van toepassing ten aanzien van uw activiteit?' is equal to 'American Football' answer this question:***  
American Football

Professioneel  
 Competitief  
 Recreatief

---

4.1.2 ***If 'Wat is het meest bij u van toepassing ten aanzien van uw activiteit?' is equal to 'Basketbal' answer this question:***  
Basketbal

Professioneel  
 Competitief  
 Recreatief

---

4.1.3 ***If 'Wat is het meest bij u van toepassing ten aanzien van uw activiteit?' is equal to 'Gymnastiek/turnen' answer this question:***  
Gymnastiek/turnen

Professioneel  
 Competitief  
 Recreatief

---

4.1.4 ***If 'Wat is het meest bij u van toepassing ten aanzien van uw activiteit?' is equal to 'Handbal' answer this question:***  
Handbal

Professioneel  
 Competitief  
 Recreatief

---

4.1.5 ***If 'Wat is het meest bij u van toepassing ten aanzien van uw activiteit?' is equal to 'Rugby' answer this question:***  
Rugby

Professioneel  
 Competitief  
 Recreatief

|        |                                                                                                                                                                                                                                                               |                                                                                                              |
|--------|---------------------------------------------------------------------------------------------------------------------------------------------------------------------------------------------------------------------------------------------------------------|--------------------------------------------------------------------------------------------------------------|
| 4.1.6  | <b>If 'Wat is het meest bij u van toepassing ten aanzien van uw acitviteit?' is equal to 'Voetbal' answer this question:</b><br>Voetbal                                                                                                                       | <input type="radio"/> Professioneel<br><input type="radio"/> Competitief<br><input type="radio"/> Recreatief |
| 4.1.7  | <b>If 'Wat is het meest bij u van toepassing ten aanzien van uw acitviteit?' is equal to 'Hockey' answer this question:</b><br>Hockey                                                                                                                         | <input type="radio"/> Professioneel<br><input type="radio"/> Competitief<br><input type="radio"/> Recreatief |
| 4.1.8  | <b>If 'Wat is het meest bij u van toepassing ten aanzien van uw acitviteit?' is equal to 'Korfbal' answer this question:</b><br>Korfbal                                                                                                                       | <input type="radio"/> Professioneel<br><input type="radio"/> Competitief<br><input type="radio"/> Recreatief |
| 4.1.9  | <b>If 'Wat is het meest bij u van toepassing ten aanzien van uw acitviteit?' is equal to 'Gevechtssporten: judo, karate, kung fu, taekwando, jiu jitsu, etc.' answer this question:</b><br>Gevechtssporten: judo, karate, kung fu, taekwando, jiu jitsu, etc. | <input type="radio"/> Professioneel<br><input type="radio"/> Competitief<br><input type="radio"/> Recreatief |
| 4.1.10 | <b>If 'Wat is het meest bij u van toepassing ten aanzien van uw acitviteit?' is equal to 'Oriëntatielopen' answer this question:</b><br>Oriëntatielopen                                                                                                       | <input type="radio"/> Professioneel<br><input type="radio"/> Competitief<br><input type="radio"/> Recreatief |
| 4.1.11 | <b>If 'Wat is het meest bij u van toepassing ten aanzien van uw acitviteit?' is equal to 'Rhythmische gymnastiek' answer this question:</b><br>Rhythmisch gymnastiek                                                                                          | <input type="radio"/> Professioneel<br><input type="radio"/> Competitief<br><input type="radio"/> Recreatief |
| 4.1.12 | <b>If 'Wat is het meest bij u van toepassing ten aanzien van uw acitviteit?' is equal to 'Volleybal' answer this question:</b><br>Volleybal                                                                                                                   | <input type="radio"/> Professioneel<br><input type="radio"/> Competitief<br><input type="radio"/> Recreatief |
| 4.1.13 | <b>If 'Wat is het meest bij u van toepassing ten aanzien van uw acitviteit?' is equal to 'Boxen' answer this question:</b><br>Boxen                                                                                                                           | <input type="radio"/> Professioneel<br><input type="radio"/> Competitief<br><input type="radio"/> Recreatief |
| 4.1.14 | <b>If 'Wat is het meest bij u van toepassing ten aanzien van uw acitviteit?' is equal to 'Freestyle snowboarden' answer this question:</b><br>Freestyle snowboarden                                                                                           | <input type="radio"/> Professioneel<br><input type="radio"/> Competitief<br><input type="radio"/> Recreatief |
| 4.1.15 | <b>If 'Wat is het meest bij u van toepassing ten aanzien van uw acitviteit?' is equal to 'Freestyle snowboarden' answer this question:</b><br>Ijshockey                                                                                                       | <input type="radio"/> Professioneel<br><input type="radio"/> Competitief<br><input type="radio"/> Recreatief |

|        |                                                                                                                                                                         |                                                                                                              |
|--------|-------------------------------------------------------------------------------------------------------------------------------------------------------------------------|--------------------------------------------------------------------------------------------------------------|
| 4.1.16 | <b>If 'Wat is het meest bij u van toepassing ten aanzien van uw acitviteit?' is equal to 'Tennis' answer this question:</b><br>Tennis                                   | <input type="radio"/> Professioneel<br><input type="radio"/> Competitief<br><input type="radio"/> Recreatief |
| 4.1.17 | <b>If 'Wat is het meest bij u van toepassing ten aanzien van uw acitviteit?' is equal to 'Worstelen' answer this question:</b><br>Worstelen                             | <input type="radio"/> Professioneel<br><input type="radio"/> Competitief<br><input type="radio"/> Recreatief |
| 4.1.18 | <b>If 'Wat is het meest bij u van toepassing ten aanzien van uw acitviteit?' is equal to 'Fitness, aerobics' answer this question:</b><br>Fitness, aerobics             | <input type="radio"/> Professioneel<br><input type="radio"/> Competitief<br><input type="radio"/> Recreatief |
| 4.1.19 | <b>If 'Wat is het meest bij u van toepassing ten aanzien van uw acitviteit?' is equal to 'Badminton' answer this question:</b><br>Badminton                             | <input type="radio"/> Professioneel<br><input type="radio"/> Competitief<br><input type="radio"/> Recreatief |
| 4.1.20 | <b>If 'Wat is het meest bij u van toepassing ten aanzien van uw acitviteit?' is equal to 'Baseball' answer this question:</b><br>Baseball                               | <input type="radio"/> Professioneel<br><input type="radio"/> Competitief<br><input type="radio"/> Recreatief |
| 4.1.21 | <b>If 'Wat is het meest bij u van toepassing ten aanzien van uw acitviteit?' is equal to 'Cross-country hardlopen' answer this question:</b><br>Cross-country hardlopen | <input type="radio"/> Professioneel<br><input type="radio"/> Competitief<br><input type="radio"/> Recreatief |
| 4.1.22 | <b>If 'Wat is het meest bij u van toepassing ten aanzien van uw acitviteit?' is equal to 'Moderne pentathlon' answer this question:</b><br>Moderne pentathlon           | <input type="radio"/> Professioneel<br><input type="radio"/> Competitief<br><input type="radio"/> Recreatief |
| 4.1.23 | <b>If 'Wat is het meest bij u van toepassing ten aanzien van uw acitviteit?' is equal to 'Squash' answer this question:</b><br>Squash                                   | <input type="radio"/> Professioneel<br><input type="radio"/> Competitief<br><input type="radio"/> Recreatief |
| 4.1.24 | <b>If 'Wat is het meest bij u van toepassing ten aanzien van uw acitviteit?' is equal to 'Surfen, windsurfen' answer this question:</b><br>Surfen, windsurfen           | <input type="radio"/> Professioneel<br><input type="radio"/> Competitief<br><input type="radio"/> Recreatief |
| 4.1.25 | <b>If 'Wat is het meest bij u van toepassing ten aanzien van uw acitviteit?' is equal to 'Tafel tennis' answer this question:</b><br>Tafel tennis                       | <input type="radio"/> Professioneel<br><input type="radio"/> Competitief<br><input type="radio"/> Recreatief |

|        |                                                                                                                                                                                             |                                                                                                              |
|--------|---------------------------------------------------------------------------------------------------------------------------------------------------------------------------------------------|--------------------------------------------------------------------------------------------------------------|
| 4.1.26 | <b>If 'Wat is het meest bij u van toepassing ten aanzien van uw activiteit?' is equal to 'Atletiek: spring-, werponderdelen' answer this question:</b><br>Atletiek: spring-, werponderdelen | <input type="radio"/> Professioneel<br><input type="radio"/> Competitief<br><input type="radio"/> Recreatief |
| 4.1.27 | <b>If 'Wat is het meest bij u van toepassing ten aanzien van uw activiteit?' is equal to 'Waterskieën' answer this question:</b><br>Waterskien                                              | <input type="radio"/> Professioneel<br><input type="radio"/> Competitief<br><input type="radio"/> Recreatief |
| 4.1.28 | <b>If 'Wat is het meest bij u van toepassing ten aanzien van uw activiteit?' is equal to 'Dans' answer this question:</b><br>Dans                                                           | <input type="radio"/> Professioneel<br><input type="radio"/> Competitief<br><input type="radio"/> Recreatief |
| 4.1.29 | <b>If 'Wat is het meest bij u van toepassing ten aanzien van uw activiteit?' is equal to 'Schermen' answer this question:</b><br>Schermen                                                   | <input type="radio"/> Professioneel<br><input type="radio"/> Competitief<br><input type="radio"/> Recreatief |
| 4.1.30 | <b>If 'Wat is het meest bij u van toepassing ten aanzien van uw activiteit?' is equal to 'Zaalhockey' answer this question:</b><br>Zaalhockey                                               | <input type="radio"/> Professioneel<br><input type="radio"/> Competitief<br><input type="radio"/> Recreatief |
| 4.1.31 | <b>If 'Wat is het meest bij u van toepassing ten aanzien van uw activiteit?' is equal to 'Bergbeklimmen' answer this question:</b><br>Bergbeklimmen                                         | <input type="radio"/> Professioneel<br><input type="radio"/> Competitief<br><input type="radio"/> Recreatief |
| 4.1.32 | <b>If 'Wat is het meest bij u van toepassing ten aanzien van uw activiteit?' is equal to 'Langlauf' answer this question:</b><br>Langlauf                                                   | <input type="radio"/> Professioneel<br><input type="radio"/> Competitief<br><input type="radio"/> Recreatief |
| 4.1.33 | <b>If 'Wat is het meest bij u van toepassing ten aanzien van uw activiteit?' is equal to 'Parachute springen' answer this question:</b><br>Parachute springen                               | <input type="radio"/> Professioneel<br><input type="radio"/> Competitief<br><input type="radio"/> Recreatief |
| 4.1.34 | <b>If 'Wat is het meest bij u van toepassing ten aanzien van uw activiteit?' is equal to 'Softball' answer this question:</b><br>Softball                                                   | <input type="radio"/> Professioneel<br><input type="radio"/> Competitief<br><input type="radio"/> Recreatief |

|        |                                                                                                                                                                                                                                                                                                                                                                                                     |                                                                                              |
|--------|-----------------------------------------------------------------------------------------------------------------------------------------------------------------------------------------------------------------------------------------------------------------------------------------------------------------------------------------------------------------------------------------------------|----------------------------------------------------------------------------------------------|
| 4.1.35 | <p><b>If 'Wat is het meest bij u van toepassing ten aanzien van uw activiteit?' is equal to 'Speciale beroepen en werkactiviteiten; speciale beroepen: ballet, professioneel soldaat, speciale reddingswerker, stuntman, etc.' answer this question:</b></p> <p>Speciale beroepen en werkactiviteiten speciale beroepen: ballet, professioneel soldaat, speciale reddingswerker, stuntman, etc.</p> | <input type="radio"/> ballet, professioneel soldaat, speciale reddingswerker, stuntman, etc. |
| 4.1.36 | <p><b>If 'Wat is het meest bij u van toepassing ten aanzien van uw activiteit?' is equal to 'Duiken' answer this question:</b></p> <p>Duiken</p>                                                                                                                                                                                                                                                    | <input type="radio"/> Professioneel/competitief<br><input type="radio"/> Recreatief          |
| 4.1.37 | <p><b>If 'Wat is het meest bij u van toepassing ten aanzien van uw activiteit?' is equal to 'Scubaduiken' answer this question:</b></p> <p>Scubaduiken</p>                                                                                                                                                                                                                                          | <input type="radio"/> Professioneel/competitief<br><input type="radio"/> Recreatief          |
| 4.1.38 | <p><b>If 'Wat is het meest bij u van toepassing ten aanzien van uw activiteit?' is equal to 'Skaten, in-line skaten' answer this question:</b></p> <p>skaten, in-linen skaten</p>                                                                                                                                                                                                                   | <input type="radio"/> Professioneel/competitief<br><input type="radio"/> Recreatief          |
| 4.1.39 | <p><b>If 'Wat is het meest bij u van toepassing ten aanzien van uw activiteit?' is equal to 'Atletiek: looponderdelen' answer this question:</b></p> <p>Atletiek: looponderdelen</p>                                                                                                                                                                                                                | <input type="radio"/> Professioneel/competitief<br><input type="radio"/> Recreatief          |
| 4.1.40 | <p><b>If 'Wat is het meest bij u van toepassing ten aanzien van uw activiteit?' is equal to 'Triatlon' answer this question:</b></p> <p>triatlon</p>                                                                                                                                                                                                                                                | <input type="radio"/> Professioneel/competitief<br><input type="radio"/> Recreatief          |
| 4.1.41 | <p><b>If 'Wat is het meest bij u van toepassing ten aanzien van uw activiteit?' is equal to 'Gewichtsheffen, body-building' answer this question:</b></p> <p>Gewichtsheffen, body-building</p>                                                                                                                                                                                                      | <input type="radio"/> Professioneel/competitief<br><input type="radio"/> Recreatief          |
| 4.1.42 | <p><b>If 'Wat is het meest bij u van toepassing ten aanzien van uw activiteit?' is equal to 'Alle competitieve sporten hieronder met 'seasonal' conditioning' answer this question:</b></p> <p>Alle competitieve sporten hieronder met 'seasonal' conditioning</p>                                                                                                                                  | <input type="radio"/> Alle competitieve sporten hieronder met 'seasonal' conditioning        |
| 4.1.43 | <p><b>If 'Wat is het meest bij u van toepassing ten aanzien van uw activiteit?' is equal to 'Zwaar fysiek werk' answer this question:</b></p> <p>Zwaar fysiek werk</p>                                                                                                                                                                                                                              | <input type="radio"/> Alle competitieve sporten hieronder met 'seasonal' conditioning        |

|        |                                                                                                                                                                                         |                                                       |
|--------|-----------------------------------------------------------------------------------------------------------------------------------------------------------------------------------------|-------------------------------------------------------|
| 4.1.44 | <b>If 'Wat is het meest bij u van toepassing ten aanzien van uw activiteit?' is equal to 'Alpine skiën en snowboarden' answer this question:</b><br>Alpine skien en snowboarden         | <input type="radio"/> Alpine skien en snowboarden     |
| 4.1.45 | <b>If 'Wat is het meest bij u van toepassing ten aanzien van uw activiteit?' is equal to 'Bowlen/curlen' answer this question:</b><br>Bowlen/curlen                                     | <input type="radio"/> Bowlen/curlen                   |
| 4.1.46 | <b>If 'Wat is het meest bij u van toepassing ten aanzien van uw activiteit?' is equal to 'Golf' answer this question:</b><br>Golf                                                       | <input type="radio"/> Golf                            |
| 4.1.47 | <b>If 'Wat is het meest bij u van toepassing ten aanzien van uw activiteit?' is equal to 'Mountainbike/BMX' answer this question:</b><br>Mountainbike/BMX                               | <input type="radio"/> Mountainbike/BMX                |
| 4.1.48 | <b>If 'Wat is het meest bij u van toepassing ten aanzien van uw activiteit?' is equal to 'Powerliften' answer this question:</b><br>Powerliften                                         | <input type="radio"/> Powerliften                     |
| 4.1.49 | <b>If 'Wat is het meest bij u van toepassing ten aanzien van uw activiteit?' is equal to 'Zeilen' answer this question:</b><br>Zeilen                                                   | <input type="radio"/> Zeilen                          |
| 4.1.50 | <b>If 'Wat is het meest bij u van toepassing ten aanzien van uw activiteit?' is equal to 'Fysiek werk' answer this question:</b><br>Fysiek werk                                         | <input type="radio"/> Fysiek werk                     |
| 4.1.51 | <b>If 'Wat is het meest bij u van toepassing ten aanzien van uw activiteit?' is equal to 'Wielrennen' answer this question:</b><br>Wielrennen                                           | <input type="radio"/> Wielrennen                      |
| 4.1.52 | <b>If 'Wat is het meest bij u van toepassing ten aanzien van uw activiteit?' is equal to 'Paardrijden' answer this question:</b><br>Paardrijden                                         | <input type="radio"/> Paardrijden                     |
| 4.1.53 | <b>If 'Wat is het meest bij u van toepassing ten aanzien van uw activiteit?' is equal to 'Motorsporten/technische sporten' answer this question:</b><br>Motorsporten/technische sporten | <input type="radio"/> Motorsporten/technische sporten |
| 4.1.54 | <b>If 'Wat is het meest bij u van toepassing ten aanzien van uw activiteit?' is equal to 'Roeien, kayakken' answer this question:</b><br>Roeien, kayakken                               | <input type="radio"/> Roeien, kayakken                |

|        |                                                                                                                                                                                                                                                                                   |                                                                                                    |
|--------|-----------------------------------------------------------------------------------------------------------------------------------------------------------------------------------------------------------------------------------------------------------------------------------|----------------------------------------------------------------------------------------------------|
| 4.1.55 | <b>If 'Wat is het meest bij u van toepassing ten aanzien van uw activiteit?' is equal to 'Boogschieten' answer this question:</b><br>Boogschieten                                                                                                                                 | <input type="radio"/> Boogschieten                                                                 |
| 4.1.56 | <b>If 'Wat is het meest bij u van toepassing ten aanzien van uw activiteit?' is equal to 'Water polo en zwemmen' answer this question:</b><br>Water polo en zwemmen                                                                                                               | <input type="radio"/> Water polo en zwemmen                                                        |
| 4.1.57 | <b>If 'Wat is het meest bij u van toepassing ten aanzien van uw activiteit?' is equal to 'Kunnen lopen op oneven grond' answer this question:</b><br>Kunnen lopen op oneven grond                                                                                                 | <input type="radio"/> Kunnen lopen op oneven grond                                                 |
| 4.1.58 | <b>If 'Wat is het meest bij u van toepassing ten aanzien van uw activiteit?' is equal to 'Geen sport, echter geen limitatie in dagelijkse activiteiten' answer this question:</b><br>Geen sport, echter geen limitatie in dagelijkse activiteiten                                 | <input type="radio"/> Geen sport, echter geen limitatie in dagelijkse activiteiten                 |
| 4.1.59 | <b>If 'Wat is het meest bij u van toepassing ten aanzien van uw activiteit?' is equal to 'Kunnen lopen op even grond, maar de dagelijkse activiteiten zijn gelimiteerd' answer this question:</b><br>Kunnen lopen op even grond, maar de dagelijkse activiteiten zijn gelimiteerd | <input type="radio"/> Kunnen lopen op even grond, maar de dagelijkse activiteiten zijn gelimiteerd |
| 4.1.60 | <b>If 'Wat is het meest bij u van toepassing ten aanzien van uw activiteit?' is equal to 'Niet kunnen lopen, fysieke handicap wegens enkelproblemen' answer this question:</b><br>Niet kunnen lopen, fysieke handicap wegens enkelproblemen                                       | <input type="radio"/> Niet kunnen lopen, fysieke handicap wegens enkelproblemen                    |

## Vragenlijst PRIMA studie 26 weken - Hoe tevreden bent u over de enkelklachten?

| Number | Question                                   | Answers                                                                                                                       |
|--------|--------------------------------------------|-------------------------------------------------------------------------------------------------------------------------------|
| 5.1    | Hoe tevreden bent u over de enkelklachten? | <input type="radio"/> Slecht<br><input type="radio"/> Matig<br><input type="radio"/> Goed<br><input type="radio"/> Uitstekend |

## Vragenlijst PRIMA studie 26 weken - SF-36

| Number | Question                                                                                                                                                                                                                                                                                                                                                           | Answers                                                                                                                                                                                                                                                                                   |
|--------|--------------------------------------------------------------------------------------------------------------------------------------------------------------------------------------------------------------------------------------------------------------------------------------------------------------------------------------------------------------------|-------------------------------------------------------------------------------------------------------------------------------------------------------------------------------------------------------------------------------------------------------------------------------------------|
|        | Deze vragenlijst gaat over uw standpunten t.a.v. uw gezondheid. Met behulp van deze gegevens kan worden bijgehouden hoe u zich voelt en hoe goed u in staat bent uw gebruikelijke bezigheden uit te voeren. Beantwoord elke vraag door een antwoord aan te klikken. Als u niet zeker weet hoe u een vraag moet beantwoorden, geef dan het best mogelijke antwoord. |                                                                                                                                                                                                                                                                                           |
| 6.1    | Hoe zou u over het algemeen uw gezondheid noemen?                                                                                                                                                                                                                                                                                                                  | <input type="radio"/> Uitstekend <input type="radio"/> Zeer goed <input type="radio"/> Goed <input type="radio"/> Matig <input type="radio"/> Slecht                                                                                                                                      |
| 6.2    | Hoe beoordeelt u nu uw gezondheid over het algemeen vergeleken met een jaar geleden?                                                                                                                                                                                                                                                                               | <input type="radio"/> Veel beter dan een jaar geleden <input type="radio"/> Wat beter dan een jaar geleden <input type="radio"/> Ongeveer hetzelfde als een jaar geleden <input type="radio"/> Wat slechter dan een jaar geleden <input type="radio"/> Veel slechter dan een jaar geleden |
| 6.3    | Wordt u door uw gezondheid op dit moment beperkt bij forse inspanning, zoals hardlopen, tillen van zware voorwerpen of een veeleisende sport beoefenen?                                                                                                                                                                                                            | <input type="radio"/> Ja, ernstig beperkt <input type="radio"/> Ja, een beetje beperkt <input type="radio"/> Nee, helemaal niet beperkt                                                                                                                                                   |
| 6.4    | Wordt u door uw gezondheid op dit moment beperkt bij matige inspanning zoals een tafel verplaatsen, stofzuigen, zwemmen of fietsen?                                                                                                                                                                                                                                | <input type="radio"/> Ja, ernstig beperkt <input type="radio"/> Ja, een beetje beperkt <input type="radio"/> Nee, helemaal niet beperkt                                                                                                                                                   |
| 6.5    | Wordt u door uw gezondheid op dit moment beperkt bij boodschappen tillen of dragen?                                                                                                                                                                                                                                                                                | <input type="radio"/> Ja, ernstig beperkt <input type="radio"/> Ja, een beetje beperkt <input type="radio"/> Nee, helemaal niet beperkt                                                                                                                                                   |
| 6.6    | Wordt u door uw gezondheid op dit moment beperkt bij een paar trappen oplopen?                                                                                                                                                                                                                                                                                     | <input type="radio"/> Ja, ernstig beperkt <input type="radio"/> Ja, een beetje beperkt <input type="radio"/> Nee, helemaal niet beperkt                                                                                                                                                   |
| 6.7    | Wordt u door uw gezondheid op dit moment beperkt bij één trap oplopen?                                                                                                                                                                                                                                                                                             | <input type="radio"/> Ja, ernstig beperkt <input type="radio"/> Ja, een beetje beperkt <input type="radio"/> Nee, helemaal niet beperkt                                                                                                                                                   |
| 6.8    | Wordt u door uw gezondheid op dit moment beperkt bij bukken, knielen of hurken?                                                                                                                                                                                                                                                                                    | <input type="radio"/> Ja, ernstig beperkt <input type="radio"/> Ja, een beetje beperkt <input type="radio"/> Nee, helemaal niet beperkt                                                                                                                                                   |
| 6.9    | Wordt u door uw gezondheid op dit moment beperkt bij meer dan één kilometer lopen?                                                                                                                                                                                                                                                                                 | <input type="radio"/> Ja, ernstig beperkt <input type="radio"/> Ja, een beetje beperkt <input type="radio"/> Nee, helemaal niet beperkt                                                                                                                                                   |
| 6.10   | Wordt u door uw gezondheid op dit moment beperkt bij een paar honderd meter lopen?                                                                                                                                                                                                                                                                                 | <input type="radio"/> Ja, ernstig beperkt <input type="radio"/> Ja, een beetje beperkt <input type="radio"/> Nee, helemaal niet beperkt                                                                                                                                                   |



- 6.11 Wordt u door uw gezondheid op dit moment beperkt bij ongeveer honderd meter lopen?  Ja, ernstig beperkt  Ja, een beetje beperkt  Nee, helemaal niet beperkt
- 
- 6.12 Wordt u door uw gezondheid op dit moment beperkt bij uzelf wassen of aankleden?  Ja, ernstig beperkt  Ja, een beetje beperkt  Nee, helemaal niet beperkt
- 
- 6.13 U besteedde in de afgelopen 4 weken minder tijd aan werk of andere bezigheden  Ja  Nee
- 
- 6.14 U heeft in de afgelopen 4 weken minder bereikt dan u zou willen  Ja  Nee
- 
- 6.15 U was in de afgelopen 4 weken beperkt in het soort werk of andere bezigheden.  Ja  Nee
- 
- 6.16 U had de afgelopen 4 weken moeite om uw werk of andere bezigheden uit te voeren (het kostte u bijvoorbeeld extra inspanning).  Ja  Nee
- 
- 6.17 U besteedde in de afgelopen 4 weken minder tijd aan werk of andere bezigheden ten gevolge van emotionele problemen  Ja  Nee
- 
- 6.18 U heeft in de afgelopen 4 weken minder bereikt dan u zou willen ten gevolge van emotionele problemen.  Ja  Nee
- 
- 6.19 U deed de afgelopen 4 weken uw werk of andere bezigheden niet zo zorgvuldig als gewoonlijk ten gevolge van emotionele problemen.  Ja  Nee
- 
- 6.20 In hoeverre hebben uw lichamelijke gezondheid of emotionele problemen u gedurende de afgelopen 4 weken gehinderd in uw normale omgang met familie, vrienden of burens, of bij activiteiten in groepsverband?  Helemaal niet  Enigszins  Nogal  Veel  Heel erg veel
- 
- 6.21 Hoeveel lichamelijke pijn heeft u de afgelopen 4 weken gehad?  Geen  Heel licht  Licht  Nogal  Ernstig  Heel ernstig
- 
- 6.22 In welke mate bent u de afgelopen 4 weken door de pijn gehinderd in uw normale werk (zowel werk buitenshuis als huishoudelijk werk)?  Helemaal niet  Een klein beetje  Nogal  Veel  Heel erg veel

---

6.23      Voelde u zich levenslustig?

Altijd  
 Meestal  
 Vaak  
 Soms  
 Zelden  
 Nooit

---

6.24      Was u erg zenuwachtig?

Altijd  
 Meestal  
 Vaak  
 Soms  
 Zelden  
 Nooit

---

6.25      Zat u zo in de put dat u niets kon?

Altijd  
 Meestal  
 Vaak  
 Soms  
 Zelden  
 Nooit

---

6.26      Voelde u zich rustig en tevreden?

Altijd  
 Meestal  
 Vaak  
 Soms  
 Zelden  
 Nooit

---

6.27      Had u veel energie?

Altijd  
 Meestal  
 Vaak  
 Soms  
 Zelden  
 Nooit

---

6.28      Voelde u zich somber en neerslachtig?

Altijd  
 Meestal  
 Vaak  
 Soms  
 Zelden  
 Nooit

- 
- 6.29      Voelde u zich uitgeput?
- Altijd  
 Meestal  
 Vaak  
 Soms  
 Zelden  
 Nooit
- 
- 6.30      Was u een gelukkig mens?
- Altijd  
 Meestal  
 Vaak  
 Soms  
 Zelden  
 Nooit
- 
- 6.31      Voelde u zich moe?
- Altijd  
 Meestal  
 Vaak  
 Soms  
 Zelden  
 Nooit
- 
- 6.32      Hoe vaak hebben uw lichamelijke gezondheid of emotionele problemen u gedurende de afgelopen 4 weken gehinderd bij uw sociale activiteiten (zoals vrienden of familie bezoeken etc.)?
- Altijd  
 Meestal  
 Soms  
 Zelden  
 Nooit
- 
- 6.33      Ik lijk wat gemakkelijker ziek te worden dan andere mensen
- Volkomen juist  
 Grotendeels juist  
 Weet ik niet  
 Grotendeels onjuist  
 Volkomen onjuist
- 
- 6.34      Ik ben even gezond als andere mensen die ik ken
- Volkomen juist  
 Grotendeels juist  
 Weet ik niet  
 Grotendeels onjuist  
 Volkomen onjuist

- |      |                                                    |                                                                                                                                                                                                              |
|------|----------------------------------------------------|--------------------------------------------------------------------------------------------------------------------------------------------------------------------------------------------------------------|
| 6.35 | Ik verwacht dat mijn gezondheid achteruit zal gaan | <input type="radio"/> Volkomen juist<br><input type="radio"/> Grotendeels juist<br><input type="radio"/> Weet ik niet<br><input type="radio"/> Grotendeels onjuist<br><input type="radio"/> Volkomen onjuist |
| 6.36 | Mijn gezondheid is uitstekend                      | <input type="radio"/> Volkomen juist<br><input type="radio"/> Grotendeels juist<br><input type="radio"/> Weet ik niet<br><input type="radio"/> Grotendeels onjuist<br><input type="radio"/> Volkomen onjuist |

## Vragenlijst PRIMA studie 26 weken - GAS

| Number | Question                                                                                                                                                                                  | Answers                                                                                                                                                                                                                                                                              |
|--------|-------------------------------------------------------------------------------------------------------------------------------------------------------------------------------------------|--------------------------------------------------------------------------------------------------------------------------------------------------------------------------------------------------------------------------------------------------------------------------------------|
|        | Tijdens de eerste afspraak werd een duidelijk doel met u afgesproken. Dit werd tevens per email naar u gestuurd. Hoe is de situatie nu ten aanzien van de destijds gestelde doelstelling? |                                                                                                                                                                                                                                                                                      |
| 7.1    | Wat is nu de situatie ten aanzien van het tijdens de eerste afspraak afgesproken doelstelling (Goal attainment Scaling)?                                                                  | <input type="radio"/> Achteruitgang (minder dan de uitgangssituatie)<br><input type="radio"/> Uitgangssituatie<br><input type="radio"/> Minder dan het doel<br><input type="radio"/> Doel<br><input type="radio"/> Meer dan het doel<br><input type="radio"/> Veel meer dan het doel |

## Vragenlijst PRIMA studie 26 weken - EQ-5D-3L

| Number | Question                                                                                                                                                                                                                                                                                                                                                           | Answers                                                                                                                                                    |
|--------|--------------------------------------------------------------------------------------------------------------------------------------------------------------------------------------------------------------------------------------------------------------------------------------------------------------------------------------------------------------------|------------------------------------------------------------------------------------------------------------------------------------------------------------|
|        | Deze vragenlijst gaat over uw standpunten t.a.v. uw gezondheid. Met behulp van deze gegevens kan worden bijgehouden hoe u zich voelt en hoe goed u in staat bent uw gebruikelijke bezigheden uit te voeren. Beantwoord elke vraag door een antwoord aan te klikken. Als u niet zeker weet hoe u een vraag moet beantwoorden, geef dan het best mogelijke antwoord. |                                                                                                                                                            |
| 8.1    | Hoe is het met uw Mobiliteit gesteld?                                                                                                                                                                                                                                                                                                                              | <input type="radio"/> Ik heb geen problemen met lopen<br><input type="radio"/> Ik heb enige problemen met lopen<br><input type="radio"/> Ik ben bedlegerig |

|                                                                                                                                                                                                                                            |                                                                                                                  |                                                                                                                                                                                                                                                             |
|--------------------------------------------------------------------------------------------------------------------------------------------------------------------------------------------------------------------------------------------|------------------------------------------------------------------------------------------------------------------|-------------------------------------------------------------------------------------------------------------------------------------------------------------------------------------------------------------------------------------------------------------|
| 8.2                                                                                                                                                                                                                                        | Hoe is het met uw Zelfzorg gesteld?                                                                              | <input type="radio"/> Ik heb geen problemen om mijzelf te wassen of aan te kleden<br><input type="radio"/> Ik heb enige problemen om mijzelf te wassen of aan te kleden<br><input type="radio"/> Ik ben niet in staat om mijzelf te wassen of aan te kleden |
| 8.3                                                                                                                                                                                                                                        | Hoe is het met de Dagelijkse activiteiten (werk, studie, huishouden, gezins- en vrijetijdsactiviteiten) gesteld? | <input type="radio"/> Ik heb geen problemen met mijn dagelijkse activiteiten<br><input type="radio"/> Ik heb enige problemen met mijn dagelijkse activiteiten<br><input type="radio"/> Ik ben niet in staat om mijn dagelijkse activiteiten uit te voeren   |
| 8.4                                                                                                                                                                                                                                        | Hoe is het met de Pijn/klachten gesteld?                                                                         | <input type="radio"/> Ik heb geen pijn of andere klachten<br><input type="radio"/> Ik heb matige pijn of andere klachten<br><input type="radio"/> Ik heb zeer ernstige pijn of andere klachten                                                              |
| 8.5                                                                                                                                                                                                                                        | Hoe is het met de Stemming gesteld?                                                                              | <input type="radio"/> Ik ben niet angstig of somber<br><input type="radio"/> Ik ben matig angstig of somber<br><input type="radio"/> Ik ben erg angstig of somber                                                                                           |
| <p>We willen weten hoe goed of slecht uw gezondheid VANDAAG is. Deze meetschaal loopt van 0 tot 100: 100 staat voor de BESTE gezondheid die u zich kunt voorstellen - 0 staat voor de SLECHTSTE gezondheid die u zich kunt voorstellen</p> |                                                                                                                  |                                                                                                                                                                                                                                                             |
| 8.6                                                                                                                                                                                                                                        | Uw Gezondheid vandaag                                                                                            | (0.00) (100.00)                                                                                                                                                                                                                                             |

## Vragenlijst PRIMA studie 26 weken - AOS

| Number                                                                                                                                                                                                                                                                                                                                                                                                               | Question                                                   | Answers                                                                                            |
|----------------------------------------------------------------------------------------------------------------------------------------------------------------------------------------------------------------------------------------------------------------------------------------------------------------------------------------------------------------------------------------------------------------------|------------------------------------------------------------|----------------------------------------------------------------------------------------------------|
| <p>Instructies: De lijn naast elke vraag staat voor hoeveel PIJN u heeft in verschillende situaties. De linker kant (0) is "geen pijn" en de rechter kant (100) is "ergste pijn denkbaar". Geef voor de onderstaande situaties op de lijn aan hoeveel PIJN u in de afgelopen week in de enkel had. Als een of meerdere van deze situaties niet van toepassing waren, dan kiest u de "niet van toepassing" optie.</p> |                                                            |                                                                                                    |
| 9.1                                                                                                                                                                                                                                                                                                                                                                                                                  | Wat was de hoogte van de ergste pijn in de afgelopen week? | (0.00) (100.00)                                                                                    |
| 9.2                                                                                                                                                                                                                                                                                                                                                                                                                  | Heeft u pijn als u 's ochtends opstaat?                    | <input type="radio"/> Ja<br><input type="radio"/> Nee<br><input type="radio"/> Niet van toepassing |

|       |                                                                                                                                                                                          |                                                                                                    |          |
|-------|------------------------------------------------------------------------------------------------------------------------------------------------------------------------------------------|----------------------------------------------------------------------------------------------------|----------|
| 9.2.1 | <b><i>If 'Heeft u pijn als u 's ochtends opstaat?' is equal to 'Ja' answer this question:</i></b><br>Hoeveel pijn heeft u voordat u 's ochtends opstaat?                                 | (0.00)                                                                                             | (100.00) |
| 9.3   | Heeft u pijn wanneer u op blote voeten loopt?                                                                                                                                            | <input type="radio"/> Ja<br><input type="radio"/> Nee<br><input type="radio"/> Niet van toepassing |          |
| 9.3.1 | <b><i>If 'Heeft u pijn wanneer u op blote voeten loopt?' is equal to 'Ja' answer this question:</i></b><br>Hoeveel pijn heeft u als u op blote voeten loopt?                             | (0.00)                                                                                             | (100.00) |
| 9.4   | Heeft u pijn wanneer u op blote voeten staat?                                                                                                                                            | <input type="radio"/> Ja<br><input type="radio"/> Nee<br><input type="radio"/> Niet van toepassing |          |
| 9.4.1 | <b><i>If 'Heeft u pijn wanneer u op blote voeten staat?' is equal to 'Ja' answer this question:</i></b><br>Hoeveel pijn heeft u als u op blote voeten staat?                             | (0.00)                                                                                             | (100.00) |
| 9.5   | Heeft u pijn wanneer u met schoenen loopt?                                                                                                                                               | <input type="radio"/> Ja<br><input type="radio"/> Nee<br><input type="radio"/> Niet van toepassing |          |
| 9.5.1 | <b><i>If 'Heeft u pijn wanneer u met schoenen loopt?' is equal to 'Ja' answer this question:</i></b><br>Hoeveel pijn heeft u wanneer u met schoenen loopt?                               | (0.00)                                                                                             | (100.00) |
| 9.6   | Heeft u pijn wanneer u met schoenen staat?                                                                                                                                               | <input type="radio"/> Ja<br><input type="radio"/> Nee<br><input type="radio"/> Niet van toepassing |          |
| 9.6.1 | <b><i>If 'Heeft u pijn wanneer u met schoenen staat?' is equal to 'Ja' answer this question:</i></b><br>Hoeveel pijn heeft u wanneer u met schoenen staat?                               | (0.00)                                                                                             | (100.00) |
| 9.7   | Heeft u pijn wanneer u loopt met steunzolen of een brace?                                                                                                                                | <input type="radio"/> Ja<br><input type="radio"/> Nee<br><input type="radio"/> Niet van toepassing |          |
| 9.7.1 | <b><i>If 'Heeft u pijn wanneer u loopt met steunzolen of een brace?' is equal to 'Ja' answer this question:</i></b><br>Hoeveel pijn heeft u wanneer u loopt met steunzolen of een brace? | (0.00)                                                                                             | (100.00) |

|                                                                                                                                                                                                                                                                                                                                                                                                                                                      |                                                                                                                                                                                   |                                                                                                    |
|------------------------------------------------------------------------------------------------------------------------------------------------------------------------------------------------------------------------------------------------------------------------------------------------------------------------------------------------------------------------------------------------------------------------------------------------------|-----------------------------------------------------------------------------------------------------------------------------------------------------------------------------------|----------------------------------------------------------------------------------------------------|
| 9.8                                                                                                                                                                                                                                                                                                                                                                                                                                                  | Heeft u pijn wanneer u staat met steunzolen of een brace?                                                                                                                         | <input type="radio"/> Ja<br><input type="radio"/> Nee<br><input type="radio"/> Niet van toepassing |
| 9.8.1                                                                                                                                                                                                                                                                                                                                                                                                                                                | <b>If 'Heeft u pijn wanneer u staat met steunzolen of een brace?' is equal to 'Ja' answer this question:</b><br>Hoeveel pijn heeft u wanneer u staat met steunzolen of een brace? | (0.00) (100.00)                                                                                    |
| 9.9                                                                                                                                                                                                                                                                                                                                                                                                                                                  | Heeft u pijn aan het einde van de dag?                                                                                                                                            | <input type="radio"/> Ja<br><input type="radio"/> Nee<br><input type="radio"/> Niet van toepassing |
| 9.9.1                                                                                                                                                                                                                                                                                                                                                                                                                                                | <b>If 'Heeft u pijn aan het einde van de dag?' is equal to 'Ja' answer this question:</b><br>Hoeveel pijn heeft u aan het einde van de dag?                                       | (0.00) (100.00)                                                                                    |
| <p>Instructies:De lijn naast elke vraag staat voor hoeveel MOEITE u heeft met verschillende activiteiten. De linker kant (0) is "Niet moeilijk" en de rechter kant (100) is "Te moeilijk, niet uitvoerbaar". Geef voor de onderstaande activiteiten op de lijn aan hoeveel MOEITE u in de afgelopen week door enkelklachten had met onderstaande activiteiten. Als een situatie niet van toepassing is, kies dan de optie "niet van toepassing".</p> |                                                                                                                                                                                   |                                                                                                    |
| 9.10                                                                                                                                                                                                                                                                                                                                                                                                                                                 | Heeft u moeite met door het huis lopen?                                                                                                                                           | <input type="radio"/> Ja<br><input type="radio"/> Nee<br><input type="radio"/> Niet van toepassing |
| 9.10.1                                                                                                                                                                                                                                                                                                                                                                                                                                               | <b>If 'Heeft u moeite met door het huis lopen?' is equal to 'Ja' answer this question:</b><br>Hoeveel moeite heeft u met door het huis lopen?                                     | (0.00) (100.00)                                                                                    |
| 9.11                                                                                                                                                                                                                                                                                                                                                                                                                                                 | Heeft u moeite met buiten lopen op oneven ondergrond?                                                                                                                             | <input type="radio"/> Ja<br><input type="radio"/> Nee<br><input type="radio"/> Niet van toepassing |
| 9.11.1                                                                                                                                                                                                                                                                                                                                                                                                                                               | <b>If 'Heeft u moeite met buiten lopen op oneven ondergrond?' is equal to 'Ja' answer this question:</b><br>Hoeveel moeite heeft u met buiten lopen op oneven ondergrond?         | (0.00) (100.00)                                                                                    |
| 9.12                                                                                                                                                                                                                                                                                                                                                                                                                                                 | Heeft u moeite met een paar honderd meter lopen?                                                                                                                                  | <input type="radio"/> Ja<br><input type="radio"/> Nee<br><input type="radio"/> Niet van toepassing |
| 9.12.1                                                                                                                                                                                                                                                                                                                                                                                                                                               | <b>If 'Heeft u moeite met een paar honderd meter lopen?' is equal to 'Ja' answer this question:</b><br>Hoeveel moeite heeft u met een paar honderd meter lopen?                   | (0.00) (100.00)                                                                                    |

|        |                                                                                                                                                                                 |                                                                                                    |        |          |
|--------|---------------------------------------------------------------------------------------------------------------------------------------------------------------------------------|----------------------------------------------------------------------------------------------------|--------|----------|
| 9.13   | Heeft u moeite met een trap oplopen?                                                                                                                                            | <input type="radio"/> Ja<br><input type="radio"/> Nee<br><input type="radio"/> Niet van toepassing |        |          |
| 9.13.1 | <b>If 'Heeft u moeite met een trap oplopen?' is equal to 'Ja' answer this question:</b><br>Hoeveel moeite heeft u met een trap oplopen?                                         |                                                                                                    | (0.00) | (100.00) |
| 9.14   | Heeft u moeite met een trap aflopen?                                                                                                                                            | <input type="radio"/> Ja<br><input type="radio"/> Nee<br><input type="radio"/> Niet van toepassing |        |          |
| 9.14.1 | <b>If 'Heeft u moeite met een trap aflopen?' is equal to 'Ja' answer this question:</b><br>Hoeveel moeite heeft u met een trap aflopen?                                         |                                                                                                    | (0.00) | (100.00) |
| 9.15   | Heeft u moeite met op de tenen staan?                                                                                                                                           | <input type="radio"/> Ja<br><input type="radio"/> Nee<br><input type="radio"/> Niet van toepassing |        |          |
| 9.15.1 | <b>If 'Heeft u moeite met op de tenen staan?' is equal to 'Ja' answer this question:</b><br>Hoeveel moeite heeft u met op de tenen staan?                                       |                                                                                                    | (0.00) | (100.00) |
| 9.16   | Heeft u moeite met opstaan uit de stoel?                                                                                                                                        | <input type="radio"/> Ja<br><input type="radio"/> Nee<br><input type="radio"/> Niet van toepassing |        |          |
| 9.16.1 | <b>If 'Heeft u moeite met opstaan uit de stoel?' is equal to 'Ja' answer this question:</b><br>Hoeveel moeite heeft u met opstaan uit de stoel?                                 |                                                                                                    | (0.00) | (100.00) |
| 9.17   | Heeft u moeite met het op- of afstappen van stoepranden?                                                                                                                        | <input type="radio"/> Ja<br><input type="radio"/> Nee<br><input type="radio"/> Niet van toepassing |        |          |
| 9.17.1 | <b>If 'Heeft u moeite met het op- of afstappen van stoepranden?' is equal to 'Ja' answer this question:</b><br>Hoeveel moeite heeft u met het op- of afstappen van stoepranden? |                                                                                                    | (0.00) | (100.00) |
| 9.18   | Heeft u moeite met snel lopen of rennen?                                                                                                                                        | <input type="radio"/> Ja<br><input type="radio"/> Nee<br><input type="radio"/> Niet van toepassing |        |          |



9.18.1 **If 'Heeft u moeite met snel lopen of rennen?' is equal to 'Ja' answer this question:** (0.00) (100.00)  
 Hoeveel moeite heeft u met snel lopen of rennen?

## Vragenlijst PRIMA studie 26 weken - FAOS

| Number                                                                                                                                                                                                                                                                                                                                                                                                                                                                                                                                                                                     | Question                                                                                             | Answers                                                                                                                                                    |
|--------------------------------------------------------------------------------------------------------------------------------------------------------------------------------------------------------------------------------------------------------------------------------------------------------------------------------------------------------------------------------------------------------------------------------------------------------------------------------------------------------------------------------------------------------------------------------------------|------------------------------------------------------------------------------------------------------|------------------------------------------------------------------------------------------------------------------------------------------------------------|
| <p>Deze lijst vraagt naar uw mening over uw voet/enkel. Uw antwoorden geven ons een beeld van uw voet/enkel klachten en hoe u in staat bent om alledaagse activiteiten uit te voeren in uw huidige situatie. Beantwoorden van een vraag doet u door het aanklikken van een vakje met het volgens u meest juiste antwoord (één vakje per vraag). Als u niet zeker weet hoe u een vraag moet beantwoorden, geeft u dan het antwoord dat volgens u het meest op uw situatie van toepassing is. Deze vraag heeft betrekking op het voorkomen van voet/enkel klachten in de afgelopen week.</p> |                                                                                                      |                                                                                                                                                            |
| 10.1                                                                                                                                                                                                                                                                                                                                                                                                                                                                                                                                                                                       | Is uw voet/enkel gezwollen?                                                                          | <input type="radio"/> Nooit <input type="radio"/> Zelden <input type="radio"/> Soms <input type="radio"/> Vaak <input type="radio"/> Altijd                |
| 10.2                                                                                                                                                                                                                                                                                                                                                                                                                                                                                                                                                                                       | Voelt u gekraak of hoort u klikken of een ander vreemd geluid wanneer u de voet/enkel beweegt?       | <input type="radio"/> Nooit <input type="radio"/> Zelden <input type="radio"/> Soms <input type="radio"/> Vaak <input type="radio"/> Altijd                |
| 10.3                                                                                                                                                                                                                                                                                                                                                                                                                                                                                                                                                                                       | Hapert uw enkel of blokkeert uw enkel ('op slot' gaan zitten) wanneer u deze beweegt?                | <input type="radio"/> Nooit <input type="radio"/> Zelden <input type="radio"/> Soms <input type="radio"/> Vaak <input type="radio"/> Altijd                |
| 10.4                                                                                                                                                                                                                                                                                                                                                                                                                                                                                                                                                                                       | Kunt u de voet/enkel volledig strekken?                                                              | <input type="radio"/> Altijd <input type="radio"/> Vaak <input type="radio"/> Soms <input type="radio"/> Zelden <input type="radio"/> Nooit                |
| 10.5                                                                                                                                                                                                                                                                                                                                                                                                                                                                                                                                                                                       | Kunt u de voet volledig naar u toe buigen?                                                           | <input type="radio"/> Altijd <input type="radio"/> Vaak <input type="radio"/> Soms <input type="radio"/> Zelden <input type="radio"/> Nooit                |
| 10.6                                                                                                                                                                                                                                                                                                                                                                                                                                                                                                                                                                                       | In welke mate heeft u een stijf gevoel in de voet/enkel 's ochtends bij het wakker worden?           | <input type="radio"/> Niet Ernstig <input type="radio"/> Mild <input type="radio"/> Matig <input type="radio"/> Zeer ernstig                               |
| 10.7                                                                                                                                                                                                                                                                                                                                                                                                                                                                                                                                                                                       | In welke mate heeft u een stijf gevoel in de voet/enkel na zitten, liggen of rusten later op de dag? | <input type="radio"/> Niet Ernstig <input type="radio"/> Mild <input type="radio"/> Matig <input type="radio"/> Zeer ernstig                               |
| 10.8                                                                                                                                                                                                                                                                                                                                                                                                                                                                                                                                                                                       | Hoe vaak heeft u pijn in uw voet/enkel?                                                              | <input type="radio"/> Nooit <input type="radio"/> Maandelijks <input type="radio"/> Wekelijks <input type="radio"/> Dagelijks <input type="radio"/> Altijd |

- 
- 10.9 Hoeveel voet/enkel pijn heeft u gehad in de afgelopen week bij draaien als uw voet/enkel op de grond staat?
- Geen  
 Mild  
 Matig  
 Ernstig  
 Zeer ernstig
- 
- 10.10 Hoeveel voet/enkel pijn heeft u gehad in de afgelopen week bij het volledig uitstrekken van de voet/enkel?
- Geen  
 Mild  
 Matig  
 Ernstig  
 Zeer ernstig
- 
- 10.11 Hoeveel voet/enkel pijn heeft u gehad in de afgelopen week bij het volledig naar u toe buigen/optrekken van de voet/enkel
- Geen  
 Mild  
 Matig  
 Ernstig  
 Zeer ernstig
- 
- 10.12 Hoeveel voet/enkel pijn heeft u gehad in de afgelopen week bij het lopen op een vlakke ondergrond
- Geen  
 Mild  
 Matig  
 Ernstig  
 Zeer ernstig
- 
- 10.13 Hoeveel voet/enkel pijn heeft u gehad in de afgelopen week bij het trap op- en trap af lopen?
- Geen  
 Mild  
 Matig  
 Ernstig  
 Zeer ernstig
- 
- 10.14 Hoeveel voet/enkel pijn heeft u gehad in de afgelopen week 's nachts in bed?
- Geen  
 Mild  
 Matig  
 Ernstig  
 Zeer ernstig
- 
- 10.15 Hoeveel voet/enkel pijn heeft u gehad in de afgelopen week bij het zitten of liggen?
- Geen  
 Mild  
 Matig  
 Ernstig  
 Zeer ernstig

|       |                                                                                                                        |                                    |                            |                             |                                    |                                    |
|-------|------------------------------------------------------------------------------------------------------------------------|------------------------------------|----------------------------|-----------------------------|------------------------------------|------------------------------------|
| 10.16 | Hoeveel voet/enkel pijn heeft u gehad in de afgelopen week bij het rechtop staan?                                      | <input type="radio"/> Geen         | <input type="radio"/> Mild | <input type="radio"/> Matig | <input type="radio"/> Ernstig      | <input type="radio"/> Zeer ernstig |
| 10.17 | In welke mate werd u gehinderd bij het trap aflopen?                                                                   | <input type="radio"/> Niet Ernstig | <input type="radio"/> Mild | <input type="radio"/> Matig | <input type="radio"/> Zeer ernstig | <input type="radio"/>              |
| 10.18 | In welke mate werd u gehinderd bij het trap op lopen?                                                                  | <input type="radio"/> Niet Ernstig | <input type="radio"/> Mild | <input type="radio"/> Matig | <input type="radio"/> Zeer ernstig | <input type="radio"/>              |
| 10.19 | In welke mate werd u gehinderd als u vanuit een zittende positie ging staan?                                           | <input type="radio"/> Niet Ernstig | <input type="radio"/> Mild | <input type="radio"/> Matig | <input type="radio"/> Zeer ernstig | <input type="radio"/>              |
| 10.20 | In welke mate werd u gehinderd bij het staan?                                                                          | <input type="radio"/> Niet Ernstig | <input type="radio"/> Mild | <input type="radio"/> Matig | <input type="radio"/> Zeer ernstig | <input type="radio"/>              |
| 10.21 | In welke mate werd u gehinderd bij het naar de grond buigen/iets oprapen?                                              | <input type="radio"/> Niet Ernstig | <input type="radio"/> Mild | <input type="radio"/> Matig | <input type="radio"/> Zeer ernstig | <input type="radio"/>              |
| 10.22 | In welke mate werd u gehinderd bij het lopen op een vlakke ondergrond?                                                 | <input type="radio"/> Niet Ernstig | <input type="radio"/> Mild | <input type="radio"/> Matig | <input type="radio"/> Zeer ernstig | <input type="radio"/>              |
| 10.23 | In welke mate werd u gehinderd bij het in- en uit de auto stappen?                                                     | <input type="radio"/> Niet Ernstig | <input type="radio"/> Mild | <input type="radio"/> Matig | <input type="radio"/> Zeer ernstig | <input type="radio"/>              |
| 10.24 | In welke mate werd u gehinderd bij het boodschappen doen?                                                              | <input type="radio"/> Niet Ernstig | <input type="radio"/> Mild | <input type="radio"/> Matig | <input type="radio"/> Zeer ernstig | <input type="radio"/>              |
| 10.25 | In welke mate werd u gehinderd bij sokken/panty's aantrekken?                                                          | <input type="radio"/> Niet Ernstig | <input type="radio"/> Mild | <input type="radio"/> Matig | <input type="radio"/> Zeer ernstig | <input type="radio"/>              |
| 10.26 | In welke mate werd u gehinderd bij het opstaan uit bed?                                                                | <input type="radio"/> Niet Ernstig | <input type="radio"/> Mild | <input type="radio"/> Matig | <input type="radio"/> Zeer ernstig | <input type="radio"/>              |
| 10.27 | In welke mate werd u gehinderd bij het sokken uittrekken?                                                              | <input type="radio"/> Niet Ernstig | <input type="radio"/> Mild | <input type="radio"/> Matig | <input type="radio"/> Zeer ernstig | <input type="radio"/>              |
| 10.28 | In welke mate werd u gehinderd bij het in bed liggen (omdraaien, lange tijd uw voet/enkel in dezelfde positie houden)? | <input type="radio"/> Niet Ernstig | <input type="radio"/> Mild | <input type="radio"/> Matig | <input type="radio"/> Zeer ernstig | <input type="radio"/>              |

|       |                                                                                                                  |                                                                                                                                                                    |                                                                      |                             |                              |
|-------|------------------------------------------------------------------------------------------------------------------|--------------------------------------------------------------------------------------------------------------------------------------------------------------------|----------------------------------------------------------------------|-----------------------------|------------------------------|
| 10.29 | In welke mate werd u gehinderd bij het in/uit bad stappen?                                                       | <input type="radio"/> Niet<br>Ernstig                                                                                                                              | <input type="radio"/> Mild<br><input type="radio"/> Zeer ernstig     | <input type="radio"/> Matig | <input type="radio"/>        |
| 10.30 | In welke mate werd u gehinderd bij zitten?                                                                       | <input type="radio"/> Niet<br>Ernstig                                                                                                                              | <input type="radio"/> Mild<br><input type="radio"/> Zeer ernstig     | <input type="radio"/> Matig | <input type="radio"/>        |
| 10.31 | In welke mate werd u gehinderd bij het toilet op en af gaan?                                                     | <input type="radio"/> Niet<br>Ernstig                                                                                                                              | <input type="radio"/> Mild<br><input type="radio"/> Zeer ernstig     | <input type="radio"/> Matig | <input type="radio"/>        |
| 10.32 | In welke mate werd u gehinderd bij zwaar huishoudelijk werk (bijvoorbeeld zware dozen sjouwen, vloer schrobben)? | <input type="radio"/> Niet<br>Ernstig                                                                                                                              | <input type="radio"/> Mild<br><input type="radio"/> Zeer ernstig     | <input type="radio"/> Matig | <input type="radio"/>        |
| 10.33 | In welke mate werd u gehinderd bij licht huishoudelijk werk (bijvoorbeeld koken, afstoffen)?                     | <input type="radio"/> Niet<br>Ernstig                                                                                                                              | <input type="radio"/> Mild<br><input type="radio"/> Zeer ernstig     | <input type="radio"/> Matig | <input type="radio"/>        |
| 10.34 | In welke mate werd u gehinderd bij hurken?                                                                       | <input type="radio"/> Niet<br>Ernstig                                                                                                                              | <input type="radio"/> Mild<br><input type="radio"/> Zeer ernstig     | <input type="radio"/> Matig | <input type="radio"/>        |
| 10.35 | In welke mate werd u gehinderd bij hardlopen?                                                                    | <input type="radio"/> Niet<br>Ernstig                                                                                                                              | <input type="radio"/> Mild<br><input type="radio"/> Zeer ernstig     | <input type="radio"/> Matig | <input type="radio"/>        |
| 10.36 | In welke mate werd u gehinderd bij springen?                                                                     | <input type="radio"/> Niet<br>Ernstig                                                                                                                              | <input type="radio"/> Mild<br><input type="radio"/> Zeer ernstig     | <input type="radio"/> Matig | <input type="radio"/>        |
| 10.37 | In welke mate werd u gehinderd bij ronddraaien op uw aangedane voet/enkel?                                       | <input type="radio"/> Niet<br>Ernstig                                                                                                                              | <input type="radio"/> Mild<br><input type="radio"/> Zeer ernstig     | <input type="radio"/> Matig | <input type="radio"/>        |
| 10.38 | In welke mate werd u gehinderd bij knielen?                                                                      | <input type="radio"/> Niet<br>Ernstig                                                                                                                              | <input type="radio"/> Mild<br><input type="radio"/> Zeer ernstig     | <input type="radio"/> Matig | <input type="radio"/>        |
| 10.39 | Hoe vaak bent u zich bewust van uw voet/enkel probleem?                                                          | <input type="radio"/> Nooit<br>Wekelijks                                                                                                                           | <input type="radio"/> Maandelijks<br><input type="radio"/> Dagelijks | <input type="radio"/>       | <input type="radio"/> Altijd |
| 10.40 | Heeft u uw leven veranderd om activiteiten te vermijden die schadelijk kunnen zijn voor uw voet/enkel?           | <input type="radio"/> Niet<br><input type="radio"/> Enigszins<br><input type="radio"/> Matig<br><input type="radio"/> Behoorlijk<br><input type="radio"/> Volledig |                                                                      |                             |                              |

- 10.41 In hoeverre kunt u op uw voet/enkel vertrouwen?
- Volledig
- Behoorlijk
- Matig
- Enigzins
- Niet

- 10.42 In het algemeen, in welke mate ondervindt u hinder van uw voet/enkel
- Geen
- Mild
- Matig
- Ernstig
- Zeer ernstig

## Vragenlijst PRIMA studie 26 weken - PRODISQ - Gezondheid en werk

| Number | Question                                                                                                                                                                                                                                                                               | Answers                                                                                                                                                                                                                                                                                                                                                                                                                                                                                                                                                                |
|--------|----------------------------------------------------------------------------------------------------------------------------------------------------------------------------------------------------------------------------------------------------------------------------------------|------------------------------------------------------------------------------------------------------------------------------------------------------------------------------------------------------------------------------------------------------------------------------------------------------------------------------------------------------------------------------------------------------------------------------------------------------------------------------------------------------------------------------------------------------------------------|
| 11.1   | Wat is uw leeftijd?                                                                                                                                                                                                                                                                    | <input type="text"/> jaar                                                                                                                                                                                                                                                                                                                                                                                                                                                                                                                                              |
| 11.2   | Wat is uw geslacht?                                                                                                                                                                                                                                                                    | <input type="radio"/> Man<br><input type="radio"/> Vrouw                                                                                                                                                                                                                                                                                                                                                                                                                                                                                                               |
| 11.3   | Wat is de hoogste opleiding die u heeft afgemaakt (Zoek uw hoogste opleiding en kruis het hokje daarvoor aan)?                                                                                                                                                                         | <input type="checkbox"/> Ik heb geen school of opleiding afgemaakt<br><input type="checkbox"/> Lagere school of basisschool<br><input type="checkbox"/> Huishoudschool, vbo, lbo, lts, leao of lhno<br><input type="checkbox"/> Mavo, mulo, ivo of vmbo<br><input type="checkbox"/> Mbo, mts, meao, mhno, inas of intas<br><input type="checkbox"/> Havo, vwo, hbs, mms, atheneum of gymnasium<br><input type="checkbox"/> Hbo, hts, heao of hhno<br><input type="checkbox"/> Universiteit<br><input type="checkbox"/> Ik heb een andere opleiding afgemaakt, namelijk |
| 11.3.1 | <p><b><i>If 'Wat is de hoogste opleiding die u heeft afgemaakt (Zoek uw hoogste opleiding en kruis het hokje daarvoor aan)?' is equal to 'Ik heb een andere opleiding afgemaakt, namelijk' answer this question:</i></b></p> <p>Wat is de hoogste opleiding die u heeft afgemaakt?</p> | <input type="text"/>                                                                                                                                                                                                                                                                                                                                                                                                                                                                                                                                                   |

|          |                                                                                                                                                                                                                                                                   |                                                                                                                                                                                                                                                                                                                                                                                                                                                  |
|----------|-------------------------------------------------------------------------------------------------------------------------------------------------------------------------------------------------------------------------------------------------------------------|--------------------------------------------------------------------------------------------------------------------------------------------------------------------------------------------------------------------------------------------------------------------------------------------------------------------------------------------------------------------------------------------------------------------------------------------------|
| 11.4     | Wat doet u in het dagelijks leven?                                                                                                                                                                                                                                | <input type="checkbox"/> Ik zit op school, ik studeer<br><input type="checkbox"/> Ik werk in loondienst<br><input type="checkbox"/> Ik ben zelfstandig ondernemer<br><input type="checkbox"/> Ik ben huisvrouw, huisman<br><input type="checkbox"/> Ik ben werkloos<br><input type="checkbox"/> Ik ben arbeidsongeschikt<br><input type="checkbox"/> Ik ben met pensioen of prepensioen<br><input type="checkbox"/> Ik doe iets anders, namelijk |
| 11.4.1   | <b>If 'Wat doet u in het dagelijks leven?' is equal to 'Ik ben arbeidsongeschikt' answer this question:</b><br>Wat doet u in het dagelijks leven?                                                                                                                 | <input type="text"/>                                                                                                                                                                                                                                                                                                                                                                                                                             |
| 11.4.2   | <b>If 'Wat doet u in het dagelijks leven?' is equal to 'Ik doe iets anders, namelijk' answer this question:</b><br>Wat doet u in het dagelijks leven?                                                                                                             | <input type="text"/>                                                                                                                                                                                                                                                                                                                                                                                                                             |
| 11.5     | Hebt u betaald werk?                                                                                                                                                                                                                                              | <input type="radio"/> Nee<br><input type="radio"/> Ja                                                                                                                                                                                                                                                                                                                                                                                            |
| 11.5.1   | <b>If 'Hebt u betaald werk?' is equal to 'Ja' answer this question:</b><br>Wat is uw beroep?                                                                                                                                                                      | <input type="text"/>                                                                                                                                                                                                                                                                                                                                                                                                                             |
| 11.5.2   | <b>If 'Hebt u betaald werk?' is equal to 'Ja' answer this question:</b><br>Hoeveel uur per week werkt u (Tel alleen de uren waarvoor u betaald wordt)?                                                                                                            | <input type="text"/> uren                                                                                                                                                                                                                                                                                                                                                                                                                        |
| 11.5.3   | <b>If 'Hebt u betaald werk?' is equal to 'Ja' answer this question:</b><br>Hoeveel dagen in de week werkt u?                                                                                                                                                      | <input type="text"/> Dagen                                                                                                                                                                                                                                                                                                                                                                                                                       |
| 11.5.4   | <b>If 'Hebt u betaald werk?' is equal to 'Ja' answer this question:</b><br>Bent u in de afgelopen 4 weken afwezig geweest van uw werk omdat u ziek was?                                                                                                           | <input type="radio"/> Nee<br><input type="radio"/> Ja                                                                                                                                                                                                                                                                                                                                                                                            |
| 11.5.4.1 | <b>If 'Bent u in de afgelopen 4 weken afwezig geweest van uw werk omdat u ziek was?' is equal to 'Ja' answer this question:</b><br>Bent u in de afgelopen 4 weken afwezig geweest van uw werk omdat u ziek was (Tel alleen de werkdagen in de afgelopen 4 weken)? | <input type="text"/> dagen afwezig geweest                                                                                                                                                                                                                                                                                                                                                                                                       |
| 11.5.4.2 | <b>If 'Bent u in de afgelopen 4 weken afwezig geweest van uw werk omdat u ziek was?' is equal to 'Ja' answer this question:</b><br>Was u langer dan de gehele periode van 4 weken afwezig van uw werk doordat u ziek was?                                         | <input type="radio"/> Nee<br><input type="radio"/> Ja                                                                                                                                                                                                                                                                                                                                                                                            |

|            |                                                                                                                                                                                                                                                                                                                                                                                                                 |                                                                                       |
|------------|-----------------------------------------------------------------------------------------------------------------------------------------------------------------------------------------------------------------------------------------------------------------------------------------------------------------------------------------------------------------------------------------------------------------|---------------------------------------------------------------------------------------|
| 11.5.4.2.1 | <b>If 'Was u langer dan de gehele periode van 4 weken afwezig van uw werk doordat u ziek was?' is equal to 'Ja' answer this question:</b><br>Wanneer heeft u zich ziek gemeld?                                                                                                                                                                                                                                  | <input type="text"/> <input type="text"/> <input type="text"/> (dd-mm-yyyy)           |
| 11.5.5     | <b>If 'Hebt u betaald werk?' is equal to 'Ja' answer this question:</b><br>Waren er in de afgelopen 4 weken, dagen waarop u wel gewerkt heeft, maar tijdens uw werk last had van lichamelijke of psychische problemen?                                                                                                                                                                                          | <input type="radio"/> Ja<br><input type="radio"/> Nee                                 |
| 11.5.5.1   | <b>If 'Waren er in de afgelopen 4 weken, dagen waarop u wel gewerkt heeft, maar tijdens uw werk last had van lichamelijke of psychische problemen?' is equal to 'Ja' answer this question:</b><br>Op hoeveel werkdagen had u tijdens uw werk last van uw lichamelijke of psychische problemen?                                                                                                                  | <input type="text"/> werkdagen                                                        |
| 11.5.5.2   | <b>If 'Waren er in de afgelopen 4 weken, dagen waarop u wel gewerkt heeft, maar tijdens uw werk last had van lichamelijke of psychische problemen?' is equal to 'Ja' answer this question:</b><br>Op de dagen dat u last had, kon u misschien niet zoveel werk doen als normaal. Hoeveel werk kon u op deze dagen gemiddeld doen?                                                                               | Ik kon op deze dagen niks doen (0.00)      Ik kon net zoveel doen als normaal (10.00) |
| 11.6       | Waren er dagen waarop u minder onbetaald werk kon doen door uw lichamelijke of psychische problemen?                                                                                                                                                                                                                                                                                                            | <input type="radio"/> Nee<br><input type="radio"/> Ja                                 |
| 11.6.1     | <b>If 'Waren er dagen waarop u minder onbetaald werk kon doen door uw lichamelijke of psychische problemen?' is equal to 'Ja' answer this question:</b><br>Op hoeveel dagen was dit zo?                                                                                                                                                                                                                         | <input type="text"/> Dagen                                                            |
| 11.6.2     | <b>If 'Waren er dagen waarop u minder onbetaald werk kon doen door uw lichamelijke of psychische problemen?' is equal to 'Ja' answer this question:</b><br>Stel dat iemand, bijvoorbeeld uw partner, familielid of een bekende, u op deze dagen had geholpen. En al het onbetaalde werk wat u niet kon doen, voor u had gedaan. Hoeveel uur was die persoon hier op deze dagen dan gemiddeld mee bezig geweest? | <input type="text"/> uur op deze dagen                                                |

## Vragenlijst PRIMA studie 26 weken - PRODISQ - Zorggebruik

| Number | Question | Answers |
|--------|----------|---------|
|--------|----------|---------|

Wij willen graag weten met welke dokters u in de afgelopen 3 maanden een afspraak had. Het gaat om afspraken voor uzelf. Ook andere zorgverleners tellen mee. Bijvoorbeeld de fysiotherapeut.

|        |                                                                                                                                                                                                                          |                                                       |
|--------|--------------------------------------------------------------------------------------------------------------------------------------------------------------------------------------------------------------------------|-------------------------------------------------------|
| 12.1   | Bent u in de afgelopen 3 maanden naar uw huisarts geweest?                                                                                                                                                               | <input type="radio"/> Nee<br><input type="radio"/> Ja |
| 12.1.1 | <b>If 'Bent u in de afgelopen 3 maanden naar uw huisarts geweest?' is equal to 'Ja' answer this question:</b><br>Hoeveel afspraken had u?                                                                                | <input type="text"/> afspraken                        |
| 12.2   | Bent u in de afgelopen 3 maanden in contact geweest met een maatschappelijk werker?                                                                                                                                      | <input type="radio"/> Nee<br><input type="radio"/> Ja |
| 12.2.1 | <b>If 'Bent u in de afgelopen 3 maanden in contact geweest met een maatschappelijk werker?' is equal to 'Ja' answer this question:</b><br>Hoeveel afspraken had u?                                                       | <input type="text"/> afspraken                        |
| 12.3   | Bent u in de afgelopen 3 maanden naar een fysiotherapeut geweest? Of een caesartherapeut, therapeut mensendieck of een manueel therapeut?                                                                                | <input type="radio"/> Nee<br><input type="radio"/> Ja |
| 12.3.1 | <b>If 'Bent u in de afgelopen 3 maanden naar een fysiotherapeut geweest? Of een caesartherapeut, therapeut mensendieck of een manueel therapeut?' is equal to 'Ja' answer this question:</b><br>Hoeveel afspraken had u? | <input type="text"/> afspraken                        |
| 12.4   | Bent u in de afgelopen 3 maanden naar een ergotherapeut geweest?                                                                                                                                                         | <input type="radio"/> Nee<br><input type="radio"/> Ja |
| 12.4.1 | <b>If 'Bent u in de afgelopen 3 maanden naar een ergotherapeut geweest?' is equal to 'Ja' answer this question:</b><br>Hoeveel afspraken had u?                                                                          | <input type="text"/> afspraken                        |
| 12.5   | Bent u in de afgelopen 3 maanden naar een logopedist geweest?                                                                                                                                                            | <input type="radio"/> Nee<br><input type="radio"/> Ja |
| 12.5.1 | <b>If 'Bent u in de afgelopen 3 maanden naar een logopedist geweest?' is equal to 'Ja' answer this question:</b><br>Hoeveel afspraken had u?                                                                             | <input type="text"/> afspraken                        |
| 12.6   | Bent u in de afgelopen 3 maanden naar een diëtist geweest?                                                                                                                                                               | <input type="radio"/> Nee<br><input type="radio"/> Ja |
| 12.6.1 | <b>If 'Bent u in de afgelopen 3 maanden naar een diëtist geweest?' is equal to 'Ja' answer this question:</b><br>Hoeveel afspraken had u?                                                                                | <input type="text"/> afspraken                        |



|           |                                                                                                                                                                                                                                                                           |                                                                                                                                                                                                                                                                                                     |
|-----------|---------------------------------------------------------------------------------------------------------------------------------------------------------------------------------------------------------------------------------------------------------------------------|-----------------------------------------------------------------------------------------------------------------------------------------------------------------------------------------------------------------------------------------------------------------------------------------------------|
| 12.7      | Bent u in de afgelopen 3 maanden naar een homeopaat geweest? Of een acupuncturist?                                                                                                                                                                                        | <input type="radio"/> Nee<br><input type="radio"/> Ja                                                                                                                                                                                                                                               |
| 12.7.1    | <b>If 'Bent u in de afgelopen 3 maanden naar een homeopaat geweest? Of een acupuncturist?' is equal to 'Ja' answer this question:</b><br>Hoeveel afspraken had u?                                                                                                         | <input type="text"/> afspraken                                                                                                                                                                                                                                                                      |
| 12.8      | Bent u in de afgelopen 3 maanden naar een psycholoog geweest? Of een psychotherapeut of psychiater?                                                                                                                                                                       | <input type="radio"/> Nee<br><input type="radio"/> Ja                                                                                                                                                                                                                                               |
| 12.8.1    | <b>If 'Bent u in de afgelopen 3 maanden naar een psycholoog geweest? Of een psychotherapeut of psychiater?' is equal to 'Ja' answer this question:</b><br>Hoeveel afspraken had u?                                                                                        | <input type="text"/> afspraken                                                                                                                                                                                                                                                                      |
| 12.9      | Heeft u in de afgelopen 3 maanden afspraken gehad met de bedrijfsarts?                                                                                                                                                                                                    | <input type="radio"/> Nee<br><input type="radio"/> Ja                                                                                                                                                                                                                                               |
| 12.9.1    | <b>If 'Heeft u in de afgelopen 3 maanden afspraken gehad met de bedrijfsarts?' is equal to 'Ja' answer this question:</b><br>Hoeveel afspraken had u?                                                                                                                     | <input type="text"/> afspraken                                                                                                                                                                                                                                                                      |
| 12.10     | Heeft u in de afgelopen 3 maanden hulp van de thuiszorg gehad?                                                                                                                                                                                                            | <input type="radio"/> Ja<br><input type="radio"/> Nee                                                                                                                                                                                                                                               |
| 12.10.1   | <b>If 'Heeft u in de afgelopen 3 maanden hulp van de thuiszorg gehad?' is equal to 'Ja' answer this question:</b><br>Wat voor hulp van de thuiszorg heeft u gehad in de afgelopen 3 maanden?                                                                              | <input type="checkbox"/> Huishoudelijke hulp; voorbeeld: stofzuigen, bed opmaken, boodschappen doen<br><input type="checkbox"/> Verzorging van uzelf; voorbeeld: hulp bij douchen of aankleden<br><input type="checkbox"/> Verpleging; voorbeeld: verband omdoen, medicijnen geven, bloeddruk meten |
| 12.10.1.1 | <b>If 'Wat voor hulp van de thuiszorg heeft u gehad in de afgelopen 3 maanden?' is equal to 'Huishoudelijke hulp; voorbeeld: stofzuigen, bed opmaken, boodschappen doen' answer this question:</b><br>Hoeveel weken heeft u deze thuiszorg gehad?<br>Huishoudelijke hulp: | <input type="text"/> weken in de afgelopen 3 maanden                                                                                                                                                                                                                                                |
| 12.10.1.2 | <b>If 'Wat voor hulp van de thuiszorg heeft u gehad in de afgelopen 3 maanden?' is equal to 'Verzorging van uzelf; voorbeeld: hulp bij douchen of aankleden' answer this question:</b><br>Hoeveel weken heeft u deze thuiszorg gehad?<br>Verzorging van uzelf:            | <input type="text"/> weken in de afgelopen 3 maanden                                                                                                                                                                                                                                                |

- 12.10.1.3 **If 'Wat voor hulp van de thuiszorg heeft u gehad in de afgelopen 3 maanden?' is equal to 'Verpleging; voorbeeld: verband omdoen, medicijnen geven, bloeddruk meten' answer this question:**  
Hoeveel weken heeft u deze thuiszorg gehad?  
Verpleging:  weken in de afgelopen 3 maanden
- 12.10.1.4 **If 'Wat voor hulp van de thuiszorg heeft u gehad in de afgelopen 3 maanden?' is equal to 'Huishoudelijke hulp; voorbeeld: stofzuigen, bed opmaken, boodschappen doen' answer this question:**  
Hoeveel uur thuiszorg kreeg u in deze weken gemiddeld? Huishoudelijke hulp: gemiddeld  uur in de week
- 12.10.1.5 **If 'Wat voor hulp van de thuiszorg heeft u gehad in de afgelopen 3 maanden?' is equal to 'Verzorging van uzelf; voorbeeld: hulp bij douchen of aankleden' answer this question:**  
Hoeveel uur thuiszorg kreeg u in deze weken gemiddeld? Verzorging van uzelf: gemiddeld  uur in de week
- 12.10.1.6 **If 'Wat voor hulp van de thuiszorg heeft u gehad in de afgelopen 3 maanden?' is equal to 'Verpleging; voorbeeld: verband omdoen, medicijnen geven, bloeddruk meten' answer this question:**  
Hoeveel uur thuiszorg kreeg u in deze weken gemiddeld? Verpleging: gemiddeld  uur in de week
- 12.11 Heeft u in de afgelopen 3 maanden medicijnen gebruikt?  Ja  Nee
- 12.11.1 **If 'Heeft u in de afgelopen 3 maanden medicijnen gebruikt?' is equal to 'Ja' answer this question:**  
Welke medicijnen heeft u in de afgelopen 3 maanden gebruikt?
- 12.12 Bent u in de afgelopen 3 maanden op de spoedeisende eerste hulp van een ziekenhuis geweest? (Een andere naam voor spoedeisende eerste hulp is EHBO)  Nee  Ja
- 12.12.1 **If 'Bent u in de afgelopen 3 maanden op de spoedeisende eerste hulp van een ziekenhuis geweest? (Een andere naam voor spoedeisende eerste hulp is EHBO)' is equal to 'Ja' answer this question:**  
Hoe vaak bent u geweest?  keer
- 12.13 Bent u in de afgelopen 3 maanden met een ambulance naar het ziekenhuis gebracht? (Een andere naam voor ambulance is ziekenauto)  Nee  Ja

|         |                                                                                                                                                                                                                                                                                                                                                           |                                                                                                                                                                                                             |
|---------|-----------------------------------------------------------------------------------------------------------------------------------------------------------------------------------------------------------------------------------------------------------------------------------------------------------------------------------------------------------|-------------------------------------------------------------------------------------------------------------------------------------------------------------------------------------------------------------|
| 12.13.1 | <b>If 'Bent u in de afgelopen 3 maanden met een ambulance naar het ziekenhuis gebracht? (Een andere naam voor ambulance is ziekenauto)' is equal to 'Ja' answer this question:</b><br>Hoe vaak bent u naar het ziekenhuis gebracht?                                                                                                                       | <input type="text"/> keer                                                                                                                                                                                   |
| 12.14   | Had u in de afgelopen 3 maanden een afspraak bij de polikliniek van het ziekenhuis? (Het gaat om afspraken voor uzelf met een dokter. Bijvoorbeeld met de cardioloog, reumatoloog of neuroloog)                                                                                                                                                           | <input type="radio"/> Ja<br><input type="radio"/> Nee                                                                                                                                                       |
| 12.14.1 | <b>If 'Had u in de afgelopen 3 maanden een afspraak bij de polikliniek van het ziekenhuis? (Het gaat om afspraken voor uzelf met een dokter. Bijvoorbeeld met de cardioloog, reumatoloog of neuroloog)' is equal to 'Ja' answer this question:</b><br>Bij welke soorten dokters bent u in de afgelopen 3 maanden in het ziekenhuis geweest? En hoe vaak?  | <input type="text"/>                                                                                                                                                                                        |
| 12.15   | Bent u in de afgelopen 3 maanden overdag in het ziekenhuis geweest voor een behandeling? (U bleef dus niet slapen. U kwam bijvoorbeeld voor een bloedtransfusie, nierdialyse of chemokuur)                                                                                                                                                                | <input type="radio"/> Ja<br><input type="radio"/> Nee                                                                                                                                                       |
| 12.15.1 | <b>If 'Bent u in de afgelopen 3 maanden overdag in het ziekenhuis geweest voor een behandeling? (U bleef dus niet slapen. U kwam bijvoorbeeld voor een bloedtransfusie, nierdialyse of chemokuur)' is equal to 'Ja' answer this question:</b><br>Voor welke soort behandeling was dit?                                                                    | <input type="text"/>                                                                                                                                                                                        |
| 12.15.2 | <b>If 'Bent u in de afgelopen 3 maanden overdag in het ziekenhuis geweest voor een behandeling? (U bleef dus niet slapen. U kwam bijvoorbeeld voor een bloedtransfusie, nierdialyse of chemokuur)' is equal to 'Ja' answer this question:</b><br>Hoeveel keer moest u in de afgelopen 3 maanden voor deze behandelingen naar het ziekenhuis?              | <input type="text"/>                                                                                                                                                                                        |
| 12.16   | Bent u in de afgelopen 3 maanden ergens anders geweest voor een behandeling overdag? (U bleef dus niet slapen. U ging bijvoorbeeld naar de dagopvang van een woon-/zorgcentrum of een psychiatrische instelling. Of naar de dagbehandeling van een revalidatiecentrum)                                                                                    | <input type="radio"/> Ja<br><input type="radio"/> Nee                                                                                                                                                       |
| 12.16.1 | <b>If 'Bent u in de afgelopen 3 maanden ergens anders geweest voor een behandeling overdag? (U bleef dus niet slapen. U ging bijvoorbeeld naar de dagopvang van een woon-/zorgcentrum of een psychiatrische instelling. Of naar de dagbehandeling van een revalidatiecentrum)' is equal to 'Ja' answer this question:</b><br>Wat voor instelling was dit? | <input type="checkbox"/> Woon-/zorgcentrum<br><input type="checkbox"/> Revalidatiecentrum<br><input type="checkbox"/> Psychiatrische instelling<br><input type="checkbox"/> Een andere instelling, namelijk |

- |           |                                                                                                                                                                                                                                                                                                 |                                                       |
|-----------|-------------------------------------------------------------------------------------------------------------------------------------------------------------------------------------------------------------------------------------------------------------------------------------------------|-------------------------------------------------------|
| 12.16.1.1 | <b>If 'Wat voor instelling was dit?' is equal to 'Een andere instelling, namelijk' answer this question:</b><br>Wat voor instelling was dit?                                                                                                                                                    | <input type="text"/>                                  |
| 12.16.1.2 | <b>If 'Wat voor instelling was dit?' is equal to 'Woon-/zorgcentrum' answer this question:</b><br>Hoe vaak moest u hier in de afgelopen 3 maanden naartoe? Naar het woon-/zorgcentrum:                                                                                                          | <input type="text"/> keer in de afgelopen 3 maanden   |
| 12.16.1.3 | <b>If 'Wat voor instelling was dit?' is equal to 'Revalidatiecentrum' answer this question:</b><br>Hoe vaak moest u hier in de afgelopen 3 maanden naartoe? Naar het revalidatiecentrum:                                                                                                        | <input type="text"/> keer in de afgelopen 3 maanden   |
| 12.16.1.4 | <b>If 'Wat voor instelling was dit?' is equal to 'Psychiatrische instelling' answer this question:</b><br>Hoe vaak moest u hier in de afgelopen 3 maanden naartoe? Naar de psychiatrische instelling:                                                                                           | <input type="text"/> keer in de afgelopen 3 maanden   |
| 12.16.1.5 | <b>If 'Wat voor instelling was dit?' is equal to 'Een andere instelling, namelijk' answer this question:</b><br>Hoe vaak moest u hier in de afgelopen 3 maanden naartoe? Naar de andere instelling:                                                                                             | <input type="text"/> keer in de afgelopen 3 maanden   |
| 12.17     | Heeft u in de afgelopen 3 maanden weleens in het ziekenhuis gelegen? (U moest dus blijven slapen. Bijvoorbeeld omdat u geopereerd was en niet meteen naar huis kon)                                                                                                                             | <input type="radio"/> Ja<br><input type="radio"/> Nee |
| 12.17.1   | <b>If 'Heeft u in de afgelopen 3 maanden weleens in het ziekenhuis gelegen? (U moest dus blijven slapen. Bijvoorbeeld omdat u geopereerd was en niet meteen naar huis kon)' is equal to 'Ja' answer this question:</b><br>Hoe vaak heeft u in de afgelopen 3 maanden in het ziekenhuis gelegen? | <input type="text"/> keer in de afgelopen 3 maanden   |
| 12.17.2   | <b>If 'Heeft u in de afgelopen 3 maanden weleens in het ziekenhuis gelegen? (U moest dus blijven slapen. Bijvoorbeeld omdat u geopereerd was en niet meteen naar huis kon)' is equal to 'Ja' answer this question:</b><br>Hoe lang heeft u in het ziekenhuis gelegen?                           | <input type="text"/> dagen in de afgelopen 3 maanden  |
| 12.18     | Moest u in de afgelopen 3 maanden ergens anders blijven slapen voor uw gezondheid? (Bijvoorbeeld in een woon-/zorgcentrum, psychiatrische instelling of revalidatiecentrum)                                                                                                                     | <input type="radio"/> Ja<br><input type="radio"/> Nee |

|           |                                                                                                                                                                                                                                                                              |                                                                                                                                                                                                                                                                                                                                                                                                                                                                                                                                                                 |
|-----------|------------------------------------------------------------------------------------------------------------------------------------------------------------------------------------------------------------------------------------------------------------------------------|-----------------------------------------------------------------------------------------------------------------------------------------------------------------------------------------------------------------------------------------------------------------------------------------------------------------------------------------------------------------------------------------------------------------------------------------------------------------------------------------------------------------------------------------------------------------|
| 12.18.1   | <b>If 'Moest u in de afgelopen 3 maanden ergens anders blijven slapen voor uw gezondheid? (Bijvoorbeeld in een woon-/zorgcentrum, psychiatrische instelling of revalidatiecentrum)' is equal to 'Ja' answer this question:</b><br>Wat voor instelling was dit?               | <input type="checkbox"/> Woon-/zorgcentrum<br><input type="checkbox"/> Revalidatiecentrum<br><input type="checkbox"/> Psychiatrische instelling<br><input type="checkbox"/> Een andere instelling, namelijk                                                                                                                                                                                                                                                                                                                                                     |
| 12.18.1.1 | <b>If 'Wat voor instelling was dit?' is equal to 'Een andere instelling, namelijk' answer this question:</b><br>Een andere instelling, namelijk                                                                                                                              | <input style="border: 1px dashed black; width: 100%; height: 40px;" type="text"/>                                                                                                                                                                                                                                                                                                                                                                                                                                                                               |
| 12.18.1.2 | <b>If 'Wat voor instelling was dit?' is equal to 'Woon-/zorgcentrum' answer this question:</b><br>Hoe lang bent u in deze instelling geweest? In het woon-/zorgcentrum:                                                                                                      | <input style="border: 1px dashed black; width: 80%; height: 20px;" type="text"/> dagen in de afgelopen 3 maanden                                                                                                                                                                                                                                                                                                                                                                                                                                                |
| 12.18.1.3 | <b>If 'Wat voor instelling was dit?' is equal to 'Revalidatiecentrum' answer this question:</b><br>Hoe lang bent u in deze instelling geweest? In het revalidatiecentrum:                                                                                                    | <input style="border: 1px dashed black; width: 80%; height: 20px;" type="text"/> dagen in de afgelopen 3 maanden                                                                                                                                                                                                                                                                                                                                                                                                                                                |
| 12.18.1.4 | <b>If 'Wat voor instelling was dit?' is equal to 'Psychiatrische instelling' answer this question:</b><br>Hoe lang bent u in deze instelling geweest? In de psychiatrische instelling:                                                                                       | <input style="border: 1px dashed black; width: 80%; height: 20px;" type="text"/> dagen in de afgelopen 3 maanden                                                                                                                                                                                                                                                                                                                                                                                                                                                |
| 12.18.1.5 | <b>If 'Wat voor instelling was dit?' is equal to 'Een andere instelling, namelijk' answer this question:</b><br>Hoe lang bent u in deze instelling geweest? In de andere instelling:                                                                                         | <input style="border: 1px dashed black; width: 80%; height: 20px;" type="text"/> dagen in de afgelopen 3 maanden                                                                                                                                                                                                                                                                                                                                                                                                                                                |
| 12.19     | Heeft u in de afgelopen 3 maanden hulp gekregen van een familielid of een bekende vanwege uw lichamelijke of psychische problemen?                                                                                                                                           | <input type="radio"/> Ja<br><input type="radio"/> Nee                                                                                                                                                                                                                                                                                                                                                                                                                                                                                                           |
| 12.19.1   | <b>If 'Heeft u in de afgelopen 3 maanden hulp gekregen van een familielid of een bekende vanwege uw lichamelijke of psychische problemen?' is equal to 'Ja' answer this question:</b><br>Wat voor hulp van familieleden of bekenden heeft u gehad in de afgelopen 3 maanden? | <input type="checkbox"/> Huishoudelijke hulp - voorbeeld: stofzuigen, bed opmaken, boodschappen doen, klaarmaken van eten en drinken, verzorgen van kinderen<br><input type="checkbox"/> Verzorging van uzelf - voorbeeld: hulp bij douchen of aankleden, hulp bij het eten en drinken of het geven van medicijnen<br><input type="checkbox"/> Praktische hulp - voorbeeld: ondersteuning bij wandelen, het maken van uitstapjes of bezoeken aan bekenden, bezoeken aan de huisarts of het ziekenhuis, het regelen van hulp of het regelen van financiële zaken |

12.19.1.1 **If 'Wat voor hulp van familieleden of bekenden heeft u gehad in de afgelopen 3 maanden?' is equal to 'Huishoudelijke hulp - voorbeeld: stofzuigen, bed opmaken, boodschappen doen, klaarmaken van eten en drinken, verzorgen van kinderen' answer this question:**  
Hoeveel weken heeft u deze hulp gehad?  
Huishoudelijke hulp:

weken in de afgelopen 3 maanden

12.19.1.2 **If 'Wat voor hulp van familieleden of bekenden heeft u gehad in de afgelopen 3 maanden?' is equal to 'Verzorging van uzelf - voorbeeld: hulp bij douchen of aankleden, hulp bij het eten en drinken of het geven van medicijnen' answer this question:**  
Hoeveel weken heeft u deze hulp gehad? Verzorging van uzelf:

weken in de afgelopen 3 maanden

12.19.1.3 **If 'Wat voor hulp van familieleden of bekenden heeft u gehad in de afgelopen 3 maanden?' is equal to 'Praktische hulp - voorbeeld: ondersteuning bij wandelen, het maken van uitstapjes of bezoeken aan bekenden, bezoeken aan de huisarts of het ziekenhuis, het regelen van hulp of het regelen van financiële zaken' answer this question:**  
Hoeveel uur hulp kreeg u in deze weken gemiddeld?  
Praktische hulp:

weken in de afgelopen 3 maanden

12.19.1.4 **If 'Wat voor hulp van familieleden of bekenden heeft u gehad in de afgelopen 3 maanden?' is equal to 'Huishoudelijke hulp - voorbeeld: stofzuigen, bed opmaken, boodschappen doen, klaarmaken van eten en drinken, verzorgen van kinderen' answer this question:**  
Hoeveel uur hulp kreeg u in deze weken gemiddeld?  
Huishoudelijke hulp: gemiddeld

uur in de week

12.19.1.5 **If 'Wat voor hulp van familieleden of bekenden heeft u gehad in de afgelopen 3 maanden?' is equal to 'Verzorging van uzelf - voorbeeld: hulp bij douchen of aankleden, hulp bij het eten en drinken of het geven van medicijnen' answer this question:**  
Hoeveel uur hulp kreeg u in deze weken gemiddeld?  
Verzorging van uzelf: gemiddeld

uur in de week

12.19.1.6 **If 'Wat voor hulp van familieleden of bekenden heeft u gehad in de afgelopen 3 maanden?' is equal to 'Praktische hulp - voorbeeld: ondersteuning bij wandelen, het maken van uitstapjes of bezoeken aan bekenden, bezoeken aan de huisarts of het ziekenhuis, het regelen van hulp of het regelen van financiële zaken' answer this question:**  
Hoeveel uur hulp kreeg u in deze weken gemiddeld?  
Praktische hulp: gemiddeld

uur in de week

## Vragenlijst PRIMA studie 26 weken - Dank

| Number | Question                                                                                                                                      | Answers              |
|--------|-----------------------------------------------------------------------------------------------------------------------------------------------|----------------------|
| 13.1   | Hartelijk dank voor de tijd die u heeft genomen om de vragenlijsten in te vullen. Indien u nog opmerkingen heeft kunt u deze hierin plaatsen. | <input type="text"/> |

## Survey 'Vragenlijst PRIMA studie 39 weken'

### Vragenlijst PRIMA studie 39 weken - PRODISQ - Gezondheid en werk

| Number | Question                                                                                                                                                                                                                                                                               | Answers                                                                                                                                                                                                                                                                                                                                                                                                                                                                                                                                                                |
|--------|----------------------------------------------------------------------------------------------------------------------------------------------------------------------------------------------------------------------------------------------------------------------------------------|------------------------------------------------------------------------------------------------------------------------------------------------------------------------------------------------------------------------------------------------------------------------------------------------------------------------------------------------------------------------------------------------------------------------------------------------------------------------------------------------------------------------------------------------------------------------|
| 1.1    | Wat is uw leeftijd?                                                                                                                                                                                                                                                                    | <input type="text"/> jaar                                                                                                                                                                                                                                                                                                                                                                                                                                                                                                                                              |
| 1.2    | Wat is uw geslacht?                                                                                                                                                                                                                                                                    | <input type="radio"/> Man<br><input type="radio"/> Vrouw                                                                                                                                                                                                                                                                                                                                                                                                                                                                                                               |
| 1.3    | Wat is de hoogste opleiding die u heeft afgemaakt (Zoek uw hoogste opleiding en kruis het hokje daarvoor aan)?                                                                                                                                                                         | <input type="checkbox"/> Ik heb geen school of opleiding afgemaakt<br><input type="checkbox"/> Lagere school of basisschool<br><input type="checkbox"/> Huishoudschool, vbo, lbo, lts, leao of lhno<br><input type="checkbox"/> Mavo, mulo, ivo of vmbo<br><input type="checkbox"/> Mbo, mts, meao, mhno, inas of intas<br><input type="checkbox"/> Havo, vwo, hbs, mms, atheneum of gymnasium<br><input type="checkbox"/> Hbo, hts, heao of hhno<br><input type="checkbox"/> Universiteit<br><input type="checkbox"/> Ik heb een andere opleiding afgemaakt, namelijk |
| 1.3.1  | <p><b><i>If 'Wat is de hoogste opleiding die u heeft afgemaakt (Zoek uw hoogste opleiding en kruis het hokje daarvoor aan)?' is equal to 'Ik heb een andere opleiding afgemaakt, namelijk' answer this question:</i></b></p> <p>Wat is de hoogste opleiding die u heeft afgemaakt?</p> | <input type="text"/>                                                                                                                                                                                                                                                                                                                                                                                                                                                                                                                                                   |

- 1.4 Wat doet u in het dagelijks leven?
- Ik zit op school, ik studeer
- Ik werk in loondienst
- Ik ben zelfstandig ondernemer
- Ik ben huisvrouw, huisman
- Ik ben werkloos
- Ik ben arbeidsongeschikt
- Ik ben met pensioen of prepensioen
- Ik doe iets anders, namelijk

- 1.4.1 **If 'Wat doet u in het dagelijks leven?' is equal to 'Ik ben arbeidsongeschikt' answer this question:**  
Wat doet u in het dagelijks leven?

- 1.4.2 **If 'Wat doet u in het dagelijks leven?' is equal to 'Ik doe iets anders, namelijk' answer this question:**  
Wat doet u in het dagelijks leven?

- 1.5 Hebt u betaald werk?
- Nee
- Ja

- 1.5.1 **If 'Hebt u betaald werk?' is equal to 'Ja' answer this question:**  
Wat is uw beroep?

- 1.5.2 **If 'Hebt u betaald werk?' is equal to 'Ja' answer this question:**  
Hoeveel uur per week werkt u (Tel alleen de uren waarvoor u betaald wordt)?

 uren

- 1.5.3 **If 'Hebt u betaald werk?' is equal to 'Ja' answer this question:**  
Hoeveel dagen in de week werkt u?

 Dagen

- 1.5.4 **If 'Hebt u betaald werk?' is equal to 'Ja' answer this question:**  
Bent u in de afgelopen 4 weken afwezig geweest van uw werk omdat u ziek was?
- Nee
- Ja

- 1.5.4.1 **If 'Bent u in de afgelopen 4 weken afwezig geweest van uw werk omdat u ziek was?' is equal to 'Ja' answer this question:**

 dagen afwezig geweest

Bent u in de afgelopen 4 weken afwezig geweest van uw werk omdat u ziek was (Tel alleen de werkdagen in de afgelopen 4 weken)?

- 1.5.4.2 **If 'Bent u in de afgelopen 4 weken afwezig geweest van uw werk omdat u ziek was?' is equal to 'Ja' answer this question:**  
Was u langer dan de gehele periode van 4 weken afwezig van uw werk doordat u ziek was?
- Nee
- Ja



|           |                                                                                                                                                                                                                                                                                                                                                                                                                 |                                                                                       |
|-----------|-----------------------------------------------------------------------------------------------------------------------------------------------------------------------------------------------------------------------------------------------------------------------------------------------------------------------------------------------------------------------------------------------------------------|---------------------------------------------------------------------------------------|
| 1.5.4.2.1 | <b>If 'Was u langer dan de gehele periode van 4 weken afwezig van uw werk doordat u ziek was?' is equal to 'Ja' answer this question:</b><br>Wanneer heeft u zich ziek gemeld?                                                                                                                                                                                                                                  | <input type="text"/> <input type="text"/> <input type="text"/> (dd-mm-yyyy)           |
| 1.5.5     | <b>If 'Hebt u betaald werk?' is equal to 'Ja' answer this question:</b><br>Waren er in de afgelopen 4 weken, dagen waarop u wel gewerkt heeft, maar tijdens uw werk last had van lichamelijke of psychische problemen?                                                                                                                                                                                          | <input type="radio"/> Ja<br><input type="radio"/> Nee                                 |
| 1.5.5.1   | <b>If 'Waren er in de afgelopen 4 weken, dagen waarop u wel gewerkt heeft, maar tijdens uw werk last had van lichamelijke of psychische problemen?' is equal to 'Ja' answer this question:</b><br>Op hoeveel werkdagen had u tijdens uw werk last van uw lichamelijke of psychische problemen?                                                                                                                  | <input type="text"/> werkdagen                                                        |
| 1.5.5.2   | <b>If 'Waren er in de afgelopen 4 weken, dagen waarop u wel gewerkt heeft, maar tijdens uw werk last had van lichamelijke of psychische problemen?' is equal to 'Ja' answer this question:</b><br>Op de dagen dat u last had, kon u misschien niet zoveel werk doen als normaal. Hoeveel werk kon u op deze dagen gemiddeld doen?                                                                               | Ik kon op deze dagen niks doen (0.00)      Ik kon net zoveel doen als normaal (10.00) |
| 1.6       | Waren er dagen waarop u minder onbetaald werk kon doen door uw lichamelijke of psychische problemen?                                                                                                                                                                                                                                                                                                            | <input type="radio"/> Nee<br><input type="radio"/> Ja                                 |
| 1.6.1     | <b>If 'Waren er dagen waarop u minder onbetaald werk kon doen door uw lichamelijke of psychische problemen?' is equal to 'Ja' answer this question:</b><br>Op hoeveel dagen was dit zo?                                                                                                                                                                                                                         | <input type="text"/> Dagen                                                            |
| 1.6.2     | <b>If 'Waren er dagen waarop u minder onbetaald werk kon doen door uw lichamelijke of psychische problemen?' is equal to 'Ja' answer this question:</b><br>Stel dat iemand, bijvoorbeeld uw partner, familielid of een bekende, u op deze dagen had geholpen. En al het onbetaalde werk wat u niet kon doen, voor u had gedaan. Hoeveel uur was die persoon hier op deze dagen dan gemiddeld mee bezig geweest? | <input type="text"/> uur op deze dagen                                                |

## Vragenlijst PRIMA studie 39 weken - PRODISQ - Zorggebruik

| Number | Question | Answers |
|--------|----------|---------|
|--------|----------|---------|

Wij willen graag weten met welke dokters u in de afgelopen 3 maanden een afspraak had. Het gaat om afspraken voor uzelf. Ook andere zorgverleners tellen mee. Bijvoorbeeld de fysiotherapeut.

|       |                                                                                                                                                                                                                          |                                                       |
|-------|--------------------------------------------------------------------------------------------------------------------------------------------------------------------------------------------------------------------------|-------------------------------------------------------|
| 2.1   | Bent u in de afgelopen 3 maanden naar uw huisarts geweest?                                                                                                                                                               | <input type="radio"/> Nee<br><input type="radio"/> Ja |
| 2.1.1 | <b>If 'Bent u in de afgelopen 3 maanden naar uw huisarts geweest?' is equal to 'Ja' answer this question:</b><br>Hoeveel afspraken had u?                                                                                | <input type="text"/> afspraken                        |
| 2.2   | Bent u in de afgelopen 3 maanden in contact geweest met een maatschappelijk werker?                                                                                                                                      | <input type="radio"/> Nee<br><input type="radio"/> Ja |
| 2.2.1 | <b>If 'Bent u in de afgelopen 3 maanden in contact geweest met een maatschappelijk werker?' is equal to 'Ja' answer this question:</b><br>Hoeveel afspraken had u?                                                       | <input type="text"/> afspraken                        |
| 2.3   | Bent u in de afgelopen 3 maanden naar een fysiotherapeut geweest? Of een caesartherapeut, therapeut mensendieck of een manueel therapeut?                                                                                | <input type="radio"/> Nee<br><input type="radio"/> Ja |
| 2.3.1 | <b>If 'Bent u in de afgelopen 3 maanden naar een fysiotherapeut geweest? Of een caesartherapeut, therapeut mensendieck of een manueel therapeut?' is equal to 'Ja' answer this question:</b><br>Hoeveel afspraken had u? | <input type="text"/> afspraken                        |
| 2.4   | Bent u in de afgelopen 3 maanden naar een ergotherapeut geweest?                                                                                                                                                         | <input type="radio"/> Nee<br><input type="radio"/> Ja |
| 2.4.1 | <b>If 'Bent u in de afgelopen 3 maanden naar een ergotherapeut geweest?' is equal to 'Ja' answer this question:</b><br>Hoeveel afspraken had u?                                                                          | <input type="text"/> afspraken                        |
| 2.5   | Bent u in de afgelopen 3 maanden naar een logopedist geweest?                                                                                                                                                            | <input type="radio"/> Nee<br><input type="radio"/> Ja |
| 2.5.1 | <b>If 'Bent u in de afgelopen 3 maanden naar een logopedist geweest?' is equal to 'Ja' answer this question:</b><br>Hoeveel afspraken had u?                                                                             | <input type="text"/> afspraken                        |
| 2.6   | Bent u in de afgelopen 3 maanden naar een diëtist geweest?                                                                                                                                                               | <input type="radio"/> Nee<br><input type="radio"/> Ja |
| 2.6.1 | <b>If 'Bent u in de afgelopen 3 maanden naar een diëtist geweest?' is equal to 'Ja' answer this question:</b><br>Hoeveel afspraken had u?                                                                                | <input type="text"/> afspraken                        |

|          |                                                                                                                                                                                                                                                                           |                                                                                                                                                                                                                                                                                                     |
|----------|---------------------------------------------------------------------------------------------------------------------------------------------------------------------------------------------------------------------------------------------------------------------------|-----------------------------------------------------------------------------------------------------------------------------------------------------------------------------------------------------------------------------------------------------------------------------------------------------|
| 2.7      | Bent u in de afgelopen 3 maanden naar een homeopaat geweest? Of een acupuncturist?                                                                                                                                                                                        | <input type="radio"/> Nee<br><input type="radio"/> Ja                                                                                                                                                                                                                                               |
| 2.7.1    | <b>If 'Bent u in de afgelopen 3 maanden naar een homeopaat geweest? Of een acupuncturist?' is equal to 'Ja' answer this question:</b><br>Hoeveel afspraken had u?                                                                                                         | <input type="text"/> afspraken                                                                                                                                                                                                                                                                      |
| 2.8      | Bent u in de afgelopen 3 maanden naar een psycholoog geweest? Of een psychotherapeut of psychiater?                                                                                                                                                                       | <input type="radio"/> Nee<br><input type="radio"/> Ja                                                                                                                                                                                                                                               |
| 2.8.1    | <b>If 'Bent u in de afgelopen 3 maanden naar een psycholoog geweest? Of een psychotherapeut of psychiater?' is equal to 'Ja' answer this question:</b><br>Hoeveel afspraken had u?                                                                                        | <input type="text"/> afspraken                                                                                                                                                                                                                                                                      |
| 2.9      | Heeft u in de afgelopen 3 maanden afspraken gehad met de bedrijfsarts?                                                                                                                                                                                                    | <input type="radio"/> Nee<br><input type="radio"/> Ja                                                                                                                                                                                                                                               |
| 2.9.1    | <b>If 'Heeft u in de afgelopen 3 maanden afspraken gehad met de bedrijfsarts?' is equal to 'Ja' answer this question:</b><br>Hoeveel afspraken had u?                                                                                                                     | <input type="text"/> afspraken                                                                                                                                                                                                                                                                      |
| 2.10     | Heeft u in de afgelopen 3 maanden hulp van de thuiszorg gehad?                                                                                                                                                                                                            | <input type="radio"/> Ja<br><input type="radio"/> Nee                                                                                                                                                                                                                                               |
| 2.10.1   | <b>If 'Heeft u in de afgelopen 3 maanden hulp van de thuiszorg gehad?' is equal to 'Ja' answer this question:</b><br>Wat voor hulp van de thuiszorg heeft u gehad in de afgelopen 3 maanden?                                                                              | <input type="checkbox"/> Huishoudelijke hulp; voorbeeld: stofzuigen, bed opmaken, boodschappen doen<br><input type="checkbox"/> Verzorging van uzelf; voorbeeld: hulp bij douchen of aankleden<br><input type="checkbox"/> Verpleging; voorbeeld: verband omdoen, medicijnen geven, bloeddruk meten |
| 2.10.1.1 | <b>If 'Wat voor hulp van de thuiszorg heeft u gehad in de afgelopen 3 maanden?' is equal to 'Huishoudelijke hulp; voorbeeld: stofzuigen, bed opmaken, boodschappen doen' answer this question:</b><br>Hoeveel weken heeft u deze thuiszorg gehad?<br>Huishoudelijke hulp: | <input type="text"/> weken in de afgelopen 3 maanden                                                                                                                                                                                                                                                |
| 2.10.1.2 | <b>If 'Wat voor hulp van de thuiszorg heeft u gehad in de afgelopen 3 maanden?' is equal to 'Verzorging van uzelf; voorbeeld: hulp bij douchen of aankleden' answer this question:</b><br>Hoeveel weken heeft u deze thuiszorg gehad?<br>Verzorging van uzelf:            | <input type="text"/> weken in de afgelopen 3 maanden                                                                                                                                                                                                                                                |

- 2.10.1.3 **If 'Wat voor hulp van de thuiszorg heeft u gehad in de afgelopen 3 maanden?' is equal to 'Verpleging; voorbeeld: verband omdoen, medicijnen geven, bloeddruk meten' answer this question:**  
Hoeveel weken heeft u deze thuiszorg gehad?  
Verpleging:  weken in de afgelopen 3 maanden
- 2.10.1.4 **If 'Wat voor hulp van de thuiszorg heeft u gehad in de afgelopen 3 maanden?' is equal to 'Huishoudelijke hulp; voorbeeld: stofzuigen, bed opmaken, boodschappen doen' answer this question:**  
Hoeveel uur thuiszorg kreeg u in deze weken gemiddeld? Huishoudelijke hulp: gemiddeld  uur in de week
- 2.10.1.5 **If 'Wat voor hulp van de thuiszorg heeft u gehad in de afgelopen 3 maanden?' is equal to 'Verzorging van uzelf; voorbeeld: hulp bij douchen of aankleden' answer this question:**  
Hoeveel uur thuiszorg kreeg u in deze weken gemiddeld? Verzorging van uzelf: gemiddeld  uur in de week
- 2.10.1.6 **If 'Wat voor hulp van de thuiszorg heeft u gehad in de afgelopen 3 maanden?' is equal to 'Verpleging; voorbeeld: verband omdoen, medicijnen geven, bloeddruk meten' answer this question:**  
Hoeveel uur thuiszorg kreeg u in deze weken gemiddeld? Verpleging: gemiddeld  uur in de week
- 2.11 Heeft u in de afgelopen 3 maanden medicijnen gebruikt?  Ja  Nee
- 2.11.1 **If 'Heeft u in de afgelopen 3 maanden medicijnen gebruikt?' is equal to 'Ja' answer this question:**  
Welke medicijnen heeft u in de afgelopen 3 maanden gebruikt?
- 2.12 Bent u in de afgelopen 3 maanden op de spoedeisende eerste hulp van een ziekenhuis geweest? (Een andere naam voor spoedeisende eerste hulp is EHBO)  Nee  Ja
- 2.12.1 **If 'Bent u in de afgelopen 3 maanden op de spoedeisende eerste hulp van een ziekenhuis geweest? (Een andere naam voor spoedeisende eerste hulp is EHBO)' is equal to 'Ja' answer this question:**  
Hoe vaak bent u geweest?  keer
- 2.13 Bent u in de afgelopen 3 maanden met een ambulance naar het ziekenhuis gebracht? (Een andere naam voor ambulance is ziekenauto)  Nee  Ja

- 2.13.1 **If 'Bent u in de afgelopen 3 maanden met een ambulance naar het ziekenhuis gebracht? (Een andere naam voor ambulance is ziekenauto)' is equal to 'Ja' answer this question:**  
Hoe vaak bent u naar het ziekenhuis gebracht?  keer
- 2.14 Had u in de afgelopen 3 maanden een afspraak bij de polikliniek van het ziekenhuis? (Het gaat om afspraken voor uzelf met een dokter. Bijvoorbeeld met de cardioloog, reumatoloog of neuroloog)  Ja  
 Nee
- 2.14.1 **If 'Had u in de afgelopen 3 maanden een afspraak bij de polikliniek van het ziekenhuis? (Het gaat om afspraken voor uzelf met een dokter. Bijvoorbeeld met de cardioloog, reumatoloog of neuroloog)' is equal to 'Ja' answer this question:**  
Bij welke soorten dokters bent u in de afgelopen 3 maanden in het ziekenhuis geweest? En hoe vaak?
- 2.15 Bent u in de afgelopen 3 maanden overdag in het ziekenhuis geweest voor een behandeling? (U bleef dus niet slapen. U kwam bijvoorbeeld voor een bloedtransfusie, nierdialyse of chemokuur)  Ja  
 Nee
- 2.15.1 **If 'Bent u in de afgelopen 3 maanden overdag in het ziekenhuis geweest voor een behandeling? (U bleef dus niet slapen. U kwam bijvoorbeeld voor een bloedtransfusie, nierdialyse of chemokuur)' is equal to 'Ja' answer this question:**  
Voor welke soort behandeling was dit?
- 2.15.2 **If 'Bent u in de afgelopen 3 maanden overdag in het ziekenhuis geweest voor een behandeling? (U bleef dus niet slapen. U kwam bijvoorbeeld voor een bloedtransfusie, nierdialyse of chemokuur)' is equal to 'Ja' answer this question:**  
Hoeveel keer moest u in de afgelopen 3 maanden voor deze behandelingen naar het ziekenhuis?
- 2.16 Bent u in de afgelopen 3 maanden ergens anders geweest voor een behandeling overdag? (U bleef dus niet slapen. U ging bijvoorbeeld naar de dagopvang van een woon-/zorgcentrum of een psychiatrische instelling. Of naar de dagbehandeling van een revalidatiecentrum)  Ja  
 Nee
- 2.16.1 **If 'Bent u in de afgelopen 3 maanden ergens anders geweest voor een behandeling overdag? (U bleef dus niet slapen. U ging bijvoorbeeld naar de dagopvang van een woon-/zorgcentrum of een psychiatrische instelling. Of naar de dagbehandeling van een revalidatiecentrum)' is equal to 'Ja' answer this question:**  
Wat voor instelling was dit?  Woon-/zorgcentrum  
 Revalidatiecentrum  
 Psychiatrische instelling  
 Een andere instelling, namelijk

- |          |                                                                                                                                                                                                                                                                                                 |                                                       |
|----------|-------------------------------------------------------------------------------------------------------------------------------------------------------------------------------------------------------------------------------------------------------------------------------------------------|-------------------------------------------------------|
| 2.16.1.1 | <b>If 'Wat voor instelling was dit?' is equal to 'Een andere instelling, namelijk' answer this question:</b><br>Wat voor instelling was dit?                                                                                                                                                    |                                                       |
| 2.16.1.2 | <b>If 'Wat voor instelling was dit?' is equal to 'Woon-/zorgcentrum' answer this question:</b><br>Hoe vaak moest u hier in de afgelopen 3 maanden naartoe? Naar het woon-/zorgcentrum:                                                                                                          | [ ] keer in de afgelopen 3 maanden                    |
| 2.16.1.3 | <b>If 'Wat voor instelling was dit?' is equal to 'Revalidatiecentrum' answer this question:</b><br>Hoe vaak moest u hier in de afgelopen 3 maanden naartoe? Naar het revalidatiecentrum:                                                                                                        | [ ] keer in de afgelopen 3 maanden                    |
| 2.16.1.4 | <b>If 'Wat voor instelling was dit?' is equal to 'Psychiatrische instelling' answer this question:</b><br>Hoe vaak moest u hier in de afgelopen 3 maanden naartoe? Naar de psychiatrische instelling:                                                                                           | [ ] keer in de afgelopen 3 maanden                    |
| 2.16.1.5 | <b>If 'Wat voor instelling was dit?' is equal to 'Een andere instelling, namelijk' answer this question:</b><br>Hoe vaak moest u hier in de afgelopen 3 maanden naartoe? Naar de andere instelling:                                                                                             | [ ] keer in de afgelopen 3 maanden                    |
| 2.17     | Heeft u in de afgelopen 3 maanden weleens in het ziekenhuis gelegen? (U moest dus blijven slapen. Bijvoorbeeld omdat u geopereerd was en niet meteen naar huis kon)                                                                                                                             | <input type="radio"/> Ja<br><input type="radio"/> Nee |
| 2.17.1   | <b>If 'Heeft u in de afgelopen 3 maanden weleens in het ziekenhuis gelegen? (U moest dus blijven slapen. Bijvoorbeeld omdat u geopereerd was en niet meteen naar huis kon)' is equal to 'Ja' answer this question:</b><br>Hoe vaak heeft u in de afgelopen 3 maanden in het ziekenhuis gelegen? | [ ] keer in de afgelopen 3 maanden                    |
| 2.17.2   | <b>If 'Heeft u in de afgelopen 3 maanden weleens in het ziekenhuis gelegen? (U moest dus blijven slapen. Bijvoorbeeld omdat u geopereerd was en niet meteen naar huis kon)' is equal to 'Ja' answer this question:</b><br>Hoe lang heeft u in het ziekenhuis gelegen?                           | [ ] dagen in de afgelopen 3 maanden                   |
| 2.18     | Moest u in de afgelopen 3 maanden ergens anders blijven slapen voor uw gezondheid? (Bijvoorbeeld in een woon-/zorgcentrum, psychiatrische instelling of revalidatiecentrum)                                                                                                                     | <input type="radio"/> Ja<br><input type="radio"/> Nee |

- 2.18.1 **If 'Moest u in de afgelopen 3 maanden ergens anders blijven slapen voor uw gezondheid? (Bijvoorbeeld in een woon-/zorgcentrum, psychiatrische instelling of revalidatiecentrum)' is equal to 'Ja' answer this question:**  
Wat voor instelling was dit?
- Woon-/zorgcentrum  
 Revalidatiecentrum  
 Psychiatrische instelling  
 Een andere instelling, namelijk
- 
- 2.18.1.1 **If 'Wat voor instelling was dit?' is equal to 'Een andere instelling, namelijk' answer this question:**  
Een andere instelling, namelijk
- 
- 
- 2.18.1.2 **If 'Wat voor instelling was dit?' is equal to 'Woon-/zorgcentrum' answer this question:**  
Hoe lang bent u in deze instelling geweest? In het woon-/zorgcentrum:
- dagen in de afgelopen 3 maanden
- 
- 2.18.1.3 **If 'Wat voor instelling was dit?' is equal to 'Revalidatiecentrum' answer this question:**  
Hoe lang bent u in deze instelling geweest? In het revalidatiecentrum:
- dagen in de afgelopen 3 maanden
- 
- 2.18.1.4 **If 'Wat voor instelling was dit?' is equal to 'Psychiatrische instelling' answer this question:**  
Hoe lang bent u in deze instelling geweest? In de psychiatrische instelling:
- dagen in de afgelopen 3 maanden
- 
- 2.18.1.5 **If 'Wat voor instelling was dit?' is equal to 'Een andere instelling, namelijk' answer this question:**  
Hoe lang bent u in deze instelling geweest? In de andere instelling:
- dagen in de afgelopen 3 maanden
- 
- 2.19 Heeft u in de afgelopen 3 maanden hulp gekregen van een familielid of een bekende vanwege uw lichamelijke of psychische problemen?
- Ja  
 Nee
- 
- 2.19.1 **If 'Heeft u in de afgelopen 3 maanden hulp gekregen van een familielid of een bekende vanwege uw lichamelijke of psychische problemen?' is equal to 'Ja' answer this question:**  
Wat voor hulp van familieleden of bekenden heeft u gehad in de afgelopen 3 maanden?
- Huishoudelijke hulp - voorbeeld: stofzuigen, bed opmaken, boodschappen doen, klaarmaken van eten en drinken, verzorgen van kinderen  
 Verzorging van uzelf - voorbeeld: hulp bij douchen of aankleden, hulp bij het eten en drinken of het geven van medicijnen  
 Praktische hulp - voorbeeld: ondersteuning bij wandelen, het maken van uitstapjes of bezoeken aan bekenden, bezoeken aan de huisarts of het ziekenhuis, het regelen van hulp of het regelen van financiële zaken

- 2.19.1.1 **If 'Wat voor hulp van familieleden of bekenden heeft u gehad in de afgelopen 3 maanden?' is equal to 'Huishoudelijke hulp - voorbeeld: stofzuigen, bed opmaken, boodschappen doen, klaarmaken van eten en drinken, verzorgen van kinderen' answer this question:**  
Hoeveel weken heeft u deze hulp gehad?  
Huishoudelijke hulp:  weken in de afgelopen 3 maanden
- 
- 2.19.1.2 **If 'Wat voor hulp van familieleden of bekenden heeft u gehad in de afgelopen 3 maanden?' is equal to 'Verzorging van uzelf - voorbeeld: hulp bij douchen of aankleden, hulp bij het eten en drinken of het geven van medicijnen' answer this question:**  
Hoeveel weken heeft u deze hulp gehad? Verzorging van uzelf:  weken in de afgelopen 3 maanden
- 
- 2.19.1.3 **If 'Wat voor hulp van familieleden of bekenden heeft u gehad in de afgelopen 3 maanden?' is equal to 'Praktische hulp - voorbeeld: ondersteuning bij wandelen, het maken van uitstapjes of bezoeken aan bekenden, bezoeken aan de huisarts of het ziekenhuis, het regelen van hulp of het regelen van financiële zaken' answer this question:**  
Hoeveel uur hulp kreeg u in deze weken gemiddeld?  
Praktische hulp:  weken in de afgelopen 3 maanden
- 
- 2.19.1.4 **If 'Wat voor hulp van familieleden of bekenden heeft u gehad in de afgelopen 3 maanden?' is equal to 'Huishoudelijke hulp - voorbeeld: stofzuigen, bed opmaken, boodschappen doen, klaarmaken van eten en drinken, verzorgen van kinderen' answer this question:**  
Hoeveel uur hulp kreeg u in deze weken gemiddeld?  
Huishoudelijke hulp: gemiddeld  uur in de week
- 
- 2.19.1.5 **If 'Wat voor hulp van familieleden of bekenden heeft u gehad in de afgelopen 3 maanden?' is equal to 'Verzorging van uzelf - voorbeeld: hulp bij douchen of aankleden, hulp bij het eten en drinken of het geven van medicijnen' answer this question:**  
Hoeveel uur hulp kreeg u in deze weken gemiddeld?  
Verzorging van uzelf: gemiddeld  uur in de week
- 
- 2.19.1.6 **If 'Wat voor hulp van familieleden of bekenden heeft u gehad in de afgelopen 3 maanden?' is equal to 'Praktische hulp - voorbeeld: ondersteuning bij wandelen, het maken van uitstapjes of bezoeken aan bekenden, bezoeken aan de huisarts of het ziekenhuis, het regelen van hulp of het regelen van financiële zaken' answer this question:**  
Hoeveel uur hulp kreeg u in deze weken gemiddeld?  
Praktische hulp: gemiddeld  uur in de week



## Vragenlijst PRIMA studie 39 weken - Dank

| Number | Question                                                                                                                                      | Answers                                                                  |
|--------|-----------------------------------------------------------------------------------------------------------------------------------------------|--------------------------------------------------------------------------|
| 3.1    | Hartelijk dank voor de tijd die u heeft genomen om de vragenlijsten in te vullen. Indien u nog opmerkingen heeft kunt u deze hierin plaatsen. | <div style="border: 1px dashed black; height: 50px; width: 100%;"></div> |

## Survey 'Vragenlijst PRIMA studie 5 jaar'

### Vragenlijst PRIMA studie 5 jaar - AOFAS - Pijn

| Number | Question                            | Answers                                                                                                                                                                                                         |
|--------|-------------------------------------|-----------------------------------------------------------------------------------------------------------------------------------------------------------------------------------------------------------------|
| 1.1    | Hoeveel pijn ervaart u aan uw voet? | <input type="checkbox"/> Geen<br><input type="checkbox"/> Milde pijnklachten of af en toe pijn<br><input type="checkbox"/> Matige pijnklachten, dagelijks<br><input type="checkbox"/> Vrijwel continu erge pijn |

### Vragenlijst PRIMA studie 5 jaar - AOFAS resterende gedeelte

| Number | Question                                              | Answers                                                                                                                                                                                                                                                                                                                                                                                                                                              |
|--------|-------------------------------------------------------|------------------------------------------------------------------------------------------------------------------------------------------------------------------------------------------------------------------------------------------------------------------------------------------------------------------------------------------------------------------------------------------------------------------------------------------------------|
| 2.1    | Hoeveel beperkingen in het dagelijks leven ervaart u? | <input type="radio"/> Geen beperkingen, geen hulpmiddelen nodig<br><input type="radio"/> Geen beperkingen in algemeen dagelijkse bezigheden, wel beperkingen in recreatieve activiteiten (sport, hobbies, etc) geen ondersteuning<br><input type="radio"/> Beperkingen bij dagelijkse- en recreatieve activiteiten, stok<br><input type="radio"/> Ernstige beperkingen bij dagelijkse- en recreatieve activiteiten, walker, krukken, rolstoel, brace |

---

|     |                                                                                                                            |                                                                                                                                                                                                                                                                                                             |
|-----|----------------------------------------------------------------------------------------------------------------------------|-------------------------------------------------------------------------------------------------------------------------------------------------------------------------------------------------------------------------------------------------------------------------------------------------------------|
| 2.2 | Wat is de afstand die u in één keer kunt lopen?                                                                            | <input type="radio"/> Meer dan 600 meter<br><input type="radio"/> 400 - 600 meter<br><input type="radio"/> 100 - 300 meter<br><input type="radio"/> Minder dan 100 meter                                                                                                                                    |
| 2.3 | Heeft u moeite met lopen op een bepaalde ondergrond?                                                                       | <input type="radio"/> Geen problemen bij lopen<br><input type="radio"/> Enig problemen op ongelijke ondergrond, trap, helling, ladders<br><input type="radio"/> Ernstige problemen bij ongelijke ondergrond, trap, helling, ladders                                                                         |
| 2.4 | Hoe zou u uw looppatroon beoordelen?                                                                                       | <input type="radio"/> Normaal of minimaal afwijkend<br><input type="radio"/> Duidelijk<br><input type="radio"/> Ernstig                                                                                                                                                                                     |
| 2.5 | Hoe zou u de beweeglijkheid van uw voet beoordelen ten opzichte van de andere zijde of ten opzichte van vóór het ongeval?  | <input type="radio"/> Hetzelfde of licht beperkt t.o.v. de niet aangedane zijde of zoals voor het ongeval<br><input type="radio"/> Ongeveer de helft beperkt<br><input type="radio"/> Sterk verminderd, bijna geen bewegingen mogelijk                                                                      |
| 2.6 | Hoe zou u de beweeglijkheid van uw enkel beoordelen ten opzichte van de andere zijde of ten opzichte van voor het ongeval? | <input type="radio"/> Hetzelfde of licht beperkt t.o.v. de niet aangedane zijde of zoals voor het ongeval<br><input type="radio"/> Ongeveer de helft beperkt<br><input type="radio"/> Sterk verminderd, bijna geen bewegingen mogelijk                                                                      |
| 2.7 | Hoe zou u de stabiliteit van uw voet en enkel beoordelen                                                                   | <input type="radio"/> Stabiel, ik verzwik mijn enkel hooguit incidenteel<br><input type="radio"/> Niet stabiel, ik verzwik mijn enkel vaak                                                                                                                                                                  |
| 2.8 | Hoe zou u de stand van uw voet beoordelen ten opzichte van de andere zijde of ten opzichte van voor het ongeval?           | <input type="radio"/> Goed, ik kan mijn voet goed plat op de grond zetten, waarbij de stand niet afwijkend is<br><input type="radio"/> Ik sta vrijwel alleen op de buitenzijde van mijn voet<br><input type="radio"/> Ik kan mijn voet niet plat op de grond zetten en loop vrijwel alleen op mijn voorvoet |

---

## Vragenlijst PRIMA studie 5 jaar - VAS Pain score

| Number | Question                                                                                                                                                             | Answers                |
|--------|----------------------------------------------------------------------------------------------------------------------------------------------------------------------|------------------------|
| 3.1    | VAS pijnscore (Geef uw minimaal pijnscore aan tijdens dagelijkse activiteiten op een schaal van 0 tot 100, waarbij 0 geen pijn is en 100 de ergste pijn denkbaar is) | (0.00) 100<br>(100.00) |

## Vragenlijst PRIMA studie 5 jaar - AAS

| Number | Question | Answers |
|--------|----------|---------|
|--------|----------|---------|

- 
- 4.1 Wat is het meest bij u van toepassing ten aanzien van uw activiteit?
- American Football
  - Basketbal
  - Gymnastiek/turnen
  - Handbal
  - Rugby
  - Voetbal
  - Hockey
  - Korfbal
  - Gevechtssporten: judo, karate, kung fu, taekwando, jiu jitsu, etc.
  - Oriëntatiewandelen
  - Rhythmische gymnastiek
  - Volleybal
  - Boxen
  - Freestyle snowboarden
  - Ijshockey
  - Tennis
  - Worstelen
  - Fitness, aerobics
  - Badminton
  - Baseball
  - Cross-country hardlopen
  - Moderne pentathlon
  - Squash
  - Surfen, windsurfen
  - Tafel tennis
  - Atletiek: spring-, werponderdelen
  - Waterskieuwen
  - Dans
  - Schermen
  - Zaalhockey
  - Bergbeklimmen
  - Langlauf
  - Parachute springen
  - Softball
  - Speciale beroepen en werkactiviteiten; speciale beroepen: ballet, professioneel soldaat, speciale reddingswerker, stuntman, etc.
  - Duiken
  - Scubaduiken
  - Skaten, in-line skaten
  - Atletiek: looponderdelen
  - Triatlon
  - Gewichtsheffen, body-building
-

- Alle competitieve sporten hieronder met 'seasonal' conditioning
- Zwaar fysiek werk
- Alpine skiën en snowboarden
- Bowlen/curlen
- Golf
- Mountainbike/BMX
- Powerliften
- Zeilen
- Fysiek werk
- Wielrennen
- Paardrijden
- Motorsporten/technische sporten
- Roeien, kayaken
- Boogschieten
- Water polo en zwemmen
- Kunnen lopen op oneven grond
- Geen sport, echter geen limitatie in dagelijkse activiteiten
- Kunnen lopen op even grond, maar de dagelijkse activiteiten zijn gelimiteerd
- Niet kunnen lopen, fysieke handicap wegens enkelproblemen

- 
- |       |                                                                                                                                                                    |                                                                                                              |
|-------|--------------------------------------------------------------------------------------------------------------------------------------------------------------------|--------------------------------------------------------------------------------------------------------------|
| 4.1.1 | <b><i>If 'Wat is het meest bij u van toepassing ten aanzien van uw activiteit?' is equal to 'American Football' answer this question:</i></b><br>American Football | <input type="radio"/> Professioneel<br><input type="radio"/> Competitief<br><input type="radio"/> Recreatief |
| <hr/> |                                                                                                                                                                    |                                                                                                              |
| 4.1.2 | <b><i>If 'Wat is het meest bij u van toepassing ten aanzien van uw activiteit?' is equal to 'Basketbal' answer this question:</i></b><br>Basketbal                 | <input type="radio"/> Professioneel<br><input type="radio"/> Competitief<br><input type="radio"/> Recreatief |
| <hr/> |                                                                                                                                                                    |                                                                                                              |
| 4.1.3 | <b><i>If 'Wat is het meest bij u van toepassing ten aanzien van uw activiteit?' is equal to 'Gymnastiek/turnen' answer this question:</i></b><br>Gymnastiek/turnen | <input type="radio"/> Professioneel<br><input type="radio"/> Competitief<br><input type="radio"/> Recreatief |
| <hr/> |                                                                                                                                                                    |                                                                                                              |
| 4.1.4 | <b><i>If 'Wat is het meest bij u van toepassing ten aanzien van uw activiteit?' is equal to 'Handbal' answer this question:</i></b><br>Handbal                     | <input type="radio"/> Professioneel<br><input type="radio"/> Competitief<br><input type="radio"/> Recreatief |
| <hr/> |                                                                                                                                                                    |                                                                                                              |
| 4.1.5 | <b><i>If 'Wat is het meest bij u van toepassing ten aanzien van uw activiteit?' is equal to 'Rugby' answer this question:</i></b><br>Rugby                         | <input type="radio"/> Professioneel<br><input type="radio"/> Competitief<br><input type="radio"/> Recreatief |

|        |                                                                                                                                                                                                                                                               |                                                                                                              |
|--------|---------------------------------------------------------------------------------------------------------------------------------------------------------------------------------------------------------------------------------------------------------------|--------------------------------------------------------------------------------------------------------------|
| 4.1.6  | <b>If 'Wat is het meest bij u van toepassing ten aanzien van uw acitviteit?' is equal to 'Voetbal' answer this question:</b><br>Voetbal                                                                                                                       | <input type="radio"/> Professioneel<br><input type="radio"/> Competitief<br><input type="radio"/> Recreatief |
| 4.1.7  | <b>If 'Wat is het meest bij u van toepassing ten aanzien van uw acitviteit?' is equal to 'Hockey' answer this question:</b><br>Hockey                                                                                                                         | <input type="radio"/> Professioneel<br><input type="radio"/> Competitief<br><input type="radio"/> Recreatief |
| 4.1.8  | <b>If 'Wat is het meest bij u van toepassing ten aanzien van uw acitviteit?' is equal to 'Korfbal' answer this question:</b><br>Korfbal                                                                                                                       | <input type="radio"/> Professioneel<br><input type="radio"/> Competitief<br><input type="radio"/> Recreatief |
| 4.1.9  | <b>If 'Wat is het meest bij u van toepassing ten aanzien van uw acitviteit?' is equal to 'Gevechtssporten: judo, karate, kung fu, taekwando, jiu jitsu, etc.' answer this question:</b><br>Gevechtssporten: judo, karate, kung fu, taekwando, jiu jitsu, etc. | <input type="radio"/> Professioneel<br><input type="radio"/> Competitief<br><input type="radio"/> Recreatief |
| 4.1.10 | <b>If 'Wat is het meest bij u van toepassing ten aanzien van uw acitviteit?' is equal to 'Oriëntatielopen' answer this question:</b><br>Oriëntatielopen                                                                                                       | <input type="radio"/> Professioneel<br><input type="radio"/> Competitief<br><input type="radio"/> Recreatief |
| 4.1.11 | <b>If 'Wat is het meest bij u van toepassing ten aanzien van uw acitviteit?' is equal to 'Rhythmische gymnastiek' answer this question:</b><br>Rhythmisch gymnastiek                                                                                          | <input type="radio"/> Professioneel<br><input type="radio"/> Competitief<br><input type="radio"/> Recreatief |
| 4.1.12 | <b>If 'Wat is het meest bij u van toepassing ten aanzien van uw acitviteit?' is equal to 'Volleybal' answer this question:</b><br>Volleybal                                                                                                                   | <input type="radio"/> Professioneel<br><input type="radio"/> Competitief<br><input type="radio"/> Recreatief |
| 4.1.13 | <b>If 'Wat is het meest bij u van toepassing ten aanzien van uw acitviteit?' is equal to 'Boxen' answer this question:</b><br>Boxen                                                                                                                           | <input type="radio"/> Professioneel<br><input type="radio"/> Competitief<br><input type="radio"/> Recreatief |
| 4.1.14 | <b>If 'Wat is het meest bij u van toepassing ten aanzien van uw acitviteit?' is equal to 'Freestyle snowboarden' answer this question:</b><br>Freestyle snowboarden                                                                                           | <input type="radio"/> Professioneel<br><input type="radio"/> Competitief<br><input type="radio"/> Recreatief |
| 4.1.15 | <b>If 'Wat is het meest bij u van toepassing ten aanzien van uw acitviteit?' is equal to 'Freestyle snowboarden' answer this question:</b><br>Ijshockey                                                                                                       | <input type="radio"/> Professioneel<br><input type="radio"/> Competitief<br><input type="radio"/> Recreatief |

|        |                                                                                                                                                                         |                                                                                                              |
|--------|-------------------------------------------------------------------------------------------------------------------------------------------------------------------------|--------------------------------------------------------------------------------------------------------------|
| 4.1.16 | <b>If 'Wat is het meest bij u van toepassing ten aanzien van uw activiteit?' is equal to 'Tennis' answer this question:</b><br>Tennis                                   | <input type="radio"/> Professioneel<br><input type="radio"/> Competitief<br><input type="radio"/> Recreatief |
| 4.1.17 | <b>If 'Wat is het meest bij u van toepassing ten aanzien van uw activiteit?' is equal to 'Worstelen' answer this question:</b><br>Worstelen                             | <input type="radio"/> Professioneel<br><input type="radio"/> Competitief<br><input type="radio"/> Recreatief |
| 4.1.18 | <b>If 'Wat is het meest bij u van toepassing ten aanzien van uw activiteit?' is equal to 'Fitness, aerobics' answer this question:</b><br>Fitness, aerobics             | <input type="radio"/> Professioneel<br><input type="radio"/> Competitief<br><input type="radio"/> Recreatief |
| 4.1.19 | <b>If 'Wat is het meest bij u van toepassing ten aanzien van uw activiteit?' is equal to 'Badminton' answer this question:</b><br>Badminton                             | <input type="radio"/> Professioneel<br><input type="radio"/> Competitief<br><input type="radio"/> Recreatief |
| 4.1.20 | <b>If 'Wat is het meest bij u van toepassing ten aanzien van uw activiteit?' is equal to 'Baseball' answer this question:</b><br>Baseball                               | <input type="radio"/> Professioneel<br><input type="radio"/> Competitief<br><input type="radio"/> Recreatief |
| 4.1.21 | <b>If 'Wat is het meest bij u van toepassing ten aanzien van uw activiteit?' is equal to 'Cross-country hardlopen' answer this question:</b><br>Cross-country hardlopen | <input type="radio"/> Professioneel<br><input type="radio"/> Competitief<br><input type="radio"/> Recreatief |
| 4.1.22 | <b>If 'Wat is het meest bij u van toepassing ten aanzien van uw activiteit?' is equal to 'Moderne pentathlon' answer this question:</b><br>Moderne pentathlon           | <input type="radio"/> Professioneel<br><input type="radio"/> Competitief<br><input type="radio"/> Recreatief |
| 4.1.23 | <b>If 'Wat is het meest bij u van toepassing ten aanzien van uw activiteit?' is equal to 'Squash' answer this question:</b><br>Squash                                   | <input type="radio"/> Professioneel<br><input type="radio"/> Competitief<br><input type="radio"/> Recreatief |
| 4.1.24 | <b>If 'Wat is het meest bij u van toepassing ten aanzien van uw activiteit?' is equal to 'Surfen, windsurfen' answer this question:</b><br>Surfen, windsurfen           | <input type="radio"/> Professioneel<br><input type="radio"/> Competitief<br><input type="radio"/> Recreatief |
| 4.1.25 | <b>If 'Wat is het meest bij u van toepassing ten aanzien van uw activiteit?' is equal to 'Tafel tennis' answer this question:</b><br>Tafel tennis                       | <input type="radio"/> Professioneel<br><input type="radio"/> Competitief<br><input type="radio"/> Recreatief |

|        |                                                                                                                                                                                             |                                                                                                              |
|--------|---------------------------------------------------------------------------------------------------------------------------------------------------------------------------------------------|--------------------------------------------------------------------------------------------------------------|
| 4.1.26 | <b>If 'Wat is het meest bij u van toepassing ten aanzien van uw activiteit?' is equal to 'Atletiek: spring-, werponderdelen' answer this question:</b><br>Atletiek: spring-, werponderdelen | <input type="radio"/> Professioneel<br><input type="radio"/> Competitief<br><input type="radio"/> Recreatief |
| 4.1.27 | <b>If 'Wat is het meest bij u van toepassing ten aanzien van uw activiteit?' is equal to 'Waterskieën' answer this question:</b><br>Waterskien                                              | <input type="radio"/> Professioneel<br><input type="radio"/> Competitief<br><input type="radio"/> Recreatief |
| 4.1.28 | <b>If 'Wat is het meest bij u van toepassing ten aanzien van uw activiteit?' is equal to 'Dans' answer this question:</b><br>Dans                                                           | <input type="radio"/> Professioneel<br><input type="radio"/> Competitief<br><input type="radio"/> Recreatief |
| 4.1.29 | <b>If 'Wat is het meest bij u van toepassing ten aanzien van uw activiteit?' is equal to 'Schermen' answer this question:</b><br>Schermen                                                   | <input type="radio"/> Professioneel<br><input type="radio"/> Competitief<br><input type="radio"/> Recreatief |
| 4.1.30 | <b>If 'Wat is het meest bij u van toepassing ten aanzien van uw activiteit?' is equal to 'Zaalhockey' answer this question:</b><br>Zaalhockey                                               | <input type="radio"/> Professioneel<br><input type="radio"/> Competitief<br><input type="radio"/> Recreatief |
| 4.1.31 | <b>If 'Wat is het meest bij u van toepassing ten aanzien van uw activiteit?' is equal to 'Bergbeklimmen' answer this question:</b><br>Bergbeklimmen                                         | <input type="radio"/> Professioneel<br><input type="radio"/> Competitief<br><input type="radio"/> Recreatief |
| 4.1.32 | <b>If 'Wat is het meest bij u van toepassing ten aanzien van uw activiteit?' is equal to 'Langlauf' answer this question:</b><br>Langlauf                                                   | <input type="radio"/> Professioneel<br><input type="radio"/> Competitief<br><input type="radio"/> Recreatief |
| 4.1.33 | <b>If 'Wat is het meest bij u van toepassing ten aanzien van uw activiteit?' is equal to 'Parachute springen' answer this question:</b><br>Parachute springen                               | <input type="radio"/> Professioneel<br><input type="radio"/> Competitief<br><input type="radio"/> Recreatief |
| 4.1.34 | <b>If 'Wat is het meest bij u van toepassing ten aanzien van uw activiteit?' is equal to 'Softball' answer this question:</b><br>Softball                                                   | <input type="radio"/> Professioneel<br><input type="radio"/> Competitief<br><input type="radio"/> Recreatief |



|        |                                                                                                                                                                                                                                                                                                                                                                                                     |                                                                                              |
|--------|-----------------------------------------------------------------------------------------------------------------------------------------------------------------------------------------------------------------------------------------------------------------------------------------------------------------------------------------------------------------------------------------------------|----------------------------------------------------------------------------------------------|
| 4.1.35 | <p><b>If 'Wat is het meest bij u van toepassing ten aanzien van uw activiteit?' is equal to 'Speciale beroepen en werkactiviteiten; speciale beroepen: ballet, professioneel soldaat, speciale reddingswerker, stuntman, etc.' answer this question:</b></p> <p>Speciale beroepen en werkactiviteiten speciale beroepen: ballet, professioneel soldaat, speciale reddingswerker, stuntman, etc.</p> | <input type="radio"/> ballet, professioneel soldaat, speciale reddingswerker, stuntman, etc. |
| 4.1.36 | <p><b>If 'Wat is het meest bij u van toepassing ten aanzien van uw activiteit?' is equal to 'Duiken' answer this question:</b></p> <p>Duiken</p>                                                                                                                                                                                                                                                    | <input type="radio"/> Professioneel/competitief<br><input type="radio"/> Recreatief          |
| 4.1.37 | <p><b>If 'Wat is het meest bij u van toepassing ten aanzien van uw activiteit?' is equal to 'Scubaduiken' answer this question:</b></p> <p>Scubaduiken</p>                                                                                                                                                                                                                                          | <input type="radio"/> Professioneel/competitief<br><input type="radio"/> Recreatief          |
| 4.1.38 | <p><b>If 'Wat is het meest bij u van toepassing ten aanzien van uw activiteit?' is equal to 'Skaten, in-line skaten' answer this question:</b></p> <p>skaten, in-linen skaten</p>                                                                                                                                                                                                                   | <input type="radio"/> Professioneel/competitief<br><input type="radio"/> Recreatief          |
| 4.1.39 | <p><b>If 'Wat is het meest bij u van toepassing ten aanzien van uw activiteit?' is equal to 'Atletiek: looponderdelen' answer this question:</b></p> <p>Atletiek: looponderdelen</p>                                                                                                                                                                                                                | <input type="radio"/> Professioneel/competitief<br><input type="radio"/> Recreatief          |
| 4.1.40 | <p><b>If 'Wat is het meest bij u van toepassing ten aanzien van uw activiteit?' is equal to 'Triatlon' answer this question:</b></p> <p>triatlon</p>                                                                                                                                                                                                                                                | <input type="radio"/> Professioneel/competitief<br><input type="radio"/> Recreatief          |
| 4.1.41 | <p><b>If 'Wat is het meest bij u van toepassing ten aanzien van uw activiteit?' is equal to 'Gewichtsheffen, body-building' answer this question:</b></p> <p>Gewichtsheffen, body-building</p>                                                                                                                                                                                                      | <input type="radio"/> Professioneel/competitief<br><input type="radio"/> Recreatief          |
| 4.1.42 | <p><b>If 'Wat is het meest bij u van toepassing ten aanzien van uw activiteit?' is equal to 'Alle competitieve sporten hieronder met 'seasonal' conditioning' answer this question:</b></p> <p>Alle competitieve sporten hieronder met 'seasonal' conditioning</p>                                                                                                                                  | <input type="radio"/> Alle competitieve sporten hieronder met 'seasonal' conditioning        |
| 4.1.43 | <p><b>If 'Wat is het meest bij u van toepassing ten aanzien van uw activiteit?' is equal to 'Zwaar fysiek werk' answer this question:</b></p> <p>Zwaar fysiek werk</p>                                                                                                                                                                                                                              | <input type="radio"/> Alle competitieve sporten hieronder met 'seasonal' conditioning        |

|        |                                                                                                                                                                                          |                                                       |
|--------|------------------------------------------------------------------------------------------------------------------------------------------------------------------------------------------|-------------------------------------------------------|
| 4.1.44 | <b>If 'Wat is het meest bij u van toepassing ten aanzien van uw acitiviteit?' is equal to 'Alpine skiën en snowboarden' answer this question:</b><br>Alpine skien en snowboarden         | <input type="radio"/> Alpine skien en snowboarden     |
| 4.1.45 | <b>If 'Wat is het meest bij u van toepassing ten aanzien van uw acitiviteit?' is equal to 'Bowlen/curlen' answer this question:</b><br>Bowlen/curlen                                     | <input type="radio"/> Bowlen/curlen                   |
| 4.1.46 | <b>If 'Wat is het meest bij u van toepassing ten aanzien van uw acitiviteit?' is equal to 'Golf' answer this question:</b><br>Golf                                                       | <input type="radio"/> Golf                            |
| 4.1.47 | <b>If 'Wat is het meest bij u van toepassing ten aanzien van uw acitiviteit?' is equal to 'Mountainbike/BMX' answer this question:</b><br>Mountainbike/BMX                               | <input type="radio"/> Mountainbike/BMX                |
| 4.1.48 | <b>If 'Wat is het meest bij u van toepassing ten aanzien van uw acitiviteit?' is equal to 'Powerliften' answer this question:</b><br>Powerliften                                         | <input type="radio"/> Powerliften                     |
| 4.1.49 | <b>If 'Wat is het meest bij u van toepassing ten aanzien van uw acitiviteit?' is equal to 'Zeilen' answer this question:</b><br>Zeilen                                                   | <input type="radio"/> Zeilen                          |
| 4.1.50 | <b>If 'Wat is het meest bij u van toepassing ten aanzien van uw acitiviteit?' is equal to 'Fysiek werk' answer this question:</b><br>Fysiek werk                                         | <input type="radio"/> Fysiek werk                     |
| 4.1.51 | <b>If 'Wat is het meest bij u van toepassing ten aanzien van uw acitiviteit?' is equal to 'Wielrennen' answer this question:</b><br>Wielrennen                                           | <input type="radio"/> Wielrennen                      |
| 4.1.52 | <b>If 'Wat is het meest bij u van toepassing ten aanzien van uw acitiviteit?' is equal to 'Paardrijden' answer this question:</b><br>Paardrijden                                         | <input type="radio"/> Paardrijden                     |
| 4.1.53 | <b>If 'Wat is het meest bij u van toepassing ten aanzien van uw acitiviteit?' is equal to 'Motorsporten/technische sporten' answer this question:</b><br>Motorsporten/technische sporten | <input type="radio"/> Motorsporten/technische sporten |
| 4.1.54 | <b>If 'Wat is het meest bij u van toepassing ten aanzien van uw acitiviteit?' is equal to 'Roeien, kayakken' answer this question:</b><br>Roeien, kayakken                               | <input type="radio"/> Roeien, kayakken                |

|        |                                                                                                                                                                                                                                                                                   |                                                                                                    |
|--------|-----------------------------------------------------------------------------------------------------------------------------------------------------------------------------------------------------------------------------------------------------------------------------------|----------------------------------------------------------------------------------------------------|
| 4.1.55 | <b>If 'Wat is het meest bij u van toepassing ten aanzien van uw activiteit?' is equal to 'Boogschieten' answer this question:</b><br>Boogschieten                                                                                                                                 | <input type="radio"/> Boogschieten                                                                 |
| 4.1.56 | <b>If 'Wat is het meest bij u van toepassing ten aanzien van uw activiteit?' is equal to 'Water polo en zwemmen' answer this question:</b><br>Water polo en zwemmen                                                                                                               | <input type="radio"/> Water polo en zwemmen                                                        |
| 4.1.57 | <b>If 'Wat is het meest bij u van toepassing ten aanzien van uw activiteit?' is equal to 'Kunnen lopen op oneven grond' answer this question:</b><br>Kunnen lopen op oneven grond                                                                                                 | <input type="radio"/> Kunnen lopen op oneven grond                                                 |
| 4.1.58 | <b>If 'Wat is het meest bij u van toepassing ten aanzien van uw activiteit?' is equal to 'Geen sport, echter geen limitatie in dagelijkse activiteiten' answer this question:</b><br>Geen sport, echter geen limitatie in dagelijkse activiteiten                                 | <input type="radio"/> Geen sport, echter geen limitatie in dagelijkse activiteiten                 |
| 4.1.59 | <b>If 'Wat is het meest bij u van toepassing ten aanzien van uw activiteit?' is equal to 'Kunnen lopen op even grond, maar de dagelijkse activiteiten zijn gelimiteerd' answer this question:</b><br>Kunnen lopen op even grond, maar de dagelijkse activiteiten zijn gelimiteerd | <input type="radio"/> Kunnen lopen op even grond, maar de dagelijkse activiteiten zijn gelimiteerd |
| 4.1.60 | <b>If 'Wat is het meest bij u van toepassing ten aanzien van uw activiteit?' is equal to 'Niet kunnen lopen, fysieke handicap wegens enkelproblemen' answer this question:</b><br>Niet kunnen lopen, fysieke handicap wegens enkelproblemen                                       | <input type="radio"/> Niet kunnen lopen, fysieke handicap wegens enkelproblemen                    |

## Vragenlijst PRIMA studie 5 jaar - Hoe tevreden bent u over de enkelklachten?

| Number | Question                                   | Answers                                                                                                                       |
|--------|--------------------------------------------|-------------------------------------------------------------------------------------------------------------------------------|
| 5.1    | Hoe tevreden bent u over de enkelklachten? | <input type="radio"/> Slecht<br><input type="radio"/> Matig<br><input type="radio"/> Goed<br><input type="radio"/> Uitstekend |

## Vragenlijst PRIMA studie 5 jaar - SF-36

| Number | Question                                                                                                                                                                                                                                                                                                                                                           | Answers                                                                                                                                                                                                                                                                                   |
|--------|--------------------------------------------------------------------------------------------------------------------------------------------------------------------------------------------------------------------------------------------------------------------------------------------------------------------------------------------------------------------|-------------------------------------------------------------------------------------------------------------------------------------------------------------------------------------------------------------------------------------------------------------------------------------------|
|        | Deze vragenlijst gaat over uw standpunten t.a.v. uw gezondheid. Met behulp van deze gegevens kan worden bijgehouden hoe u zich voelt en hoe goed u in staat bent uw gebruikelijke bezigheden uit te voeren. Beantwoord elke vraag door een antwoord aan te klikken. Als u niet zeker weet hoe u een vraag moet beantwoorden, geef dan het best mogelijke antwoord. |                                                                                                                                                                                                                                                                                           |
| 6.1    | Hoe zou u over het algemeen uw gezondheid noemen?                                                                                                                                                                                                                                                                                                                  | <input type="radio"/> Uitstekend <input type="radio"/> Zeer goed <input type="radio"/> Goed <input type="radio"/> Matig <input type="radio"/> Slecht                                                                                                                                      |
| 6.2    | Hoe beoordeelt u nu uw gezondheid over het algemeen vergeleken met een jaar geleden?                                                                                                                                                                                                                                                                               | <input type="radio"/> Veel beter dan een jaar geleden <input type="radio"/> Wat beter dan een jaar geleden <input type="radio"/> Ongeveer hetzelfde als een jaar geleden <input type="radio"/> Wat slechter dan een jaar geleden <input type="radio"/> Veel slechter dan een jaar geleden |
| 6.3    | Wordt u door uw gezondheid op dit moment beperkt bij forse inspanning, zoals hardlopen, tillen van zware voorwerpen of een veeleisende sport beoefenen?                                                                                                                                                                                                            | <input type="radio"/> Ja, ernstig beperkt <input type="radio"/> Ja, een beetje beperkt <input type="radio"/> Nee, helemaal niet beperkt                                                                                                                                                   |
| 6.4    | Wordt u door uw gezondheid op dit moment beperkt bij matige inspanning zoals een tafel verplaatsen, stofzuigen, zwemmen of fietsen?                                                                                                                                                                                                                                | <input type="radio"/> Ja, ernstig beperkt <input type="radio"/> Ja, een beetje beperkt <input type="radio"/> Nee, helemaal niet beperkt                                                                                                                                                   |
| 6.5    | Wordt u door uw gezondheid op dit moment beperkt bij boodschappen tillen of dragen?                                                                                                                                                                                                                                                                                | <input type="radio"/> Ja, ernstig beperkt <input type="radio"/> Ja, een beetje beperkt <input type="radio"/> Nee, helemaal niet beperkt                                                                                                                                                   |
| 6.6    | Wordt u door uw gezondheid op dit moment beperkt bij een paar trappen oplopen?                                                                                                                                                                                                                                                                                     | <input type="radio"/> Ja, ernstig beperkt <input type="radio"/> Ja, een beetje beperkt <input type="radio"/> Nee, helemaal niet beperkt                                                                                                                                                   |
| 6.7    | Wordt u door uw gezondheid op dit moment beperkt bij één trap oplopen?                                                                                                                                                                                                                                                                                             | <input type="radio"/> Ja, ernstig beperkt <input type="radio"/> Ja, een beetje beperkt <input type="radio"/> Nee, helemaal niet beperkt                                                                                                                                                   |
| 6.8    | Wordt u door uw gezondheid op dit moment beperkt bij bukken, knielen of hurken?                                                                                                                                                                                                                                                                                    | <input type="radio"/> Ja, ernstig beperkt <input type="radio"/> Ja, een beetje beperkt <input type="radio"/> Nee, helemaal niet beperkt                                                                                                                                                   |
| 6.9    | Wordt u door uw gezondheid op dit moment beperkt bij meer dan één kilometer lopen?                                                                                                                                                                                                                                                                                 | <input type="radio"/> Ja, ernstig beperkt <input type="radio"/> Ja, een beetje beperkt <input type="radio"/> Nee, helemaal niet beperkt                                                                                                                                                   |
| 6.10   | Wordt u door uw gezondheid op dit moment beperkt bij een paar honderd meter lopen?                                                                                                                                                                                                                                                                                 | <input type="radio"/> Ja, ernstig beperkt <input type="radio"/> Ja, een beetje beperkt <input type="radio"/> Nee, helemaal niet beperkt                                                                                                                                                   |

- 6.11 Wordt u door uw gezondheid op dit moment beperkt bij ongeveer honderd meter lopen?  Ja, ernstig beperkt  Ja, een beetje beperkt  Nee, helemaal niet beperkt
- 
- 6.12 Wordt u door uw gezondheid op dit moment beperkt bij uzelf wassen of aankleden?  Ja, ernstig beperkt  Ja, een beetje beperkt  Nee, helemaal niet beperkt
- 
- 6.13 U besteedde in de afgelopen 4 weken minder tijd aan werk of andere bezigheden  Ja  Nee
- 
- 6.14 U heeft in de afgelopen 4 weken minder bereikt dan u zou willen  Ja  Nee
- 
- 6.15 U was in de afgelopen 4 weken beperkt in het soort werk of andere bezigheden.  Ja  Nee
- 
- 6.16 U had de afgelopen 4 weken moeite om uw werk of andere bezigheden uit te voeren (het kostte u bijvoorbeeld extra inspanning).  Ja  Nee
- 
- 6.17 U besteedde in de afgelopen 4 weken minder tijd aan werk of andere bezigheden ten gevolge van emotionele problemen  Ja  Nee
- 
- 6.18 U heeft in de afgelopen 4 weken minder bereikt dan u zou willen ten gevolge van emotionele problemen.  Ja  Nee
- 
- 6.19 U deed de afgelopen 4 weken uw werk of andere bezigheden niet zo zorgvuldig als gewoonlijk ten gevolge van emotionele problemen.  Ja  Nee
- 
- 6.20 In hoeverre hebben uw lichamelijke gezondheid of emotionele problemen u gedurende de afgelopen 4 weken gehinderd in uw normale omgang met familie, vrienden of burens, of bij activiteiten in groepsverband?  Helemaal niet  Enigszins  Nogal  Veel  Heel erg veel
- 
- 6.21 Hoeveel lichamelijke pijn heeft u de afgelopen 4 weken gehad?  Geen  Heel licht  Licht  Nogal  Ernstig  Heel ernstig
- 
- 6.22 In welke mate bent u de afgelopen 4 weken door de pijn gehinderd in uw normale werk (zowel werk buitenshuis als huishoudelijk werk)?  Helemaal niet  Een klein beetje  Nogal  Veel  Heel erg veel

---

6.23      Voelde u zich levenslustig?

Altijd  
 Meestal  
 Vaak  
 Soms  
 Zelden  
 Nooit

---

6.24      Was u erg zenuwachtig?

Altijd  
 Meestal  
 Vaak  
 Soms  
 Zelden  
 Nooit

---

6.25      Zat u zo in de put dat u niets kon?

Altijd  
 Meestal  
 Vaak  
 Soms  
 Zelden  
 Nooit

---

6.26      Voelde u zich rustig en tevreden?

Altijd  
 Meestal  
 Vaak  
 Soms  
 Zelden  
 Nooit

---

6.27      Had u veel energie?

Altijd  
 Meestal  
 Vaak  
 Soms  
 Zelden  
 Nooit

---

6.28      Voelde u zich somber en neerslachtig?

Altijd  
 Meestal  
 Vaak  
 Soms  
 Zelden  
 Nooit

- 
- 6.29      Voelde u zich uitgeput?
- Altijd  
 Meestal  
 Vaak  
 Soms  
 Zelden  
 Nooit
- 
- 6.30      Was u een gelukkig mens?
- Altijd  
 Meestal  
 Vaak  
 Soms  
 Zelden  
 Nooit
- 
- 6.31      Voelde u zich moe?
- Altijd  
 Meestal  
 Vaak  
 Soms  
 Zelden  
 Nooit
- 
- 6.32      Hoe vaak hebben uw lichamelijke gezondheid of emotionele problemen u gedurende de afgelopen 4 weken gehinderd bij uw sociale activiteiten (zoals vrienden of familie bezoeken etc.)?
- Altijd  
 Meestal  
 Soms  
 Zelden  
 Nooit
- 
- 6.33      Ik lijk wat gemakkelijker ziek te worden dan andere mensen
- Volkomen juist  
 Grotendeels juist  
 Weet ik niet  
 Grotendeels onjuist  
 Volkomen onjuist
- 
- 6.34      Ik ben even gezond als andere mensen die ik ken
- Volkomen juist  
 Grotendeels juist  
 Weet ik niet  
 Grotendeels onjuist  
 Volkomen onjuist

- |      |                                                    |                                                                                                                                                                                                              |
|------|----------------------------------------------------|--------------------------------------------------------------------------------------------------------------------------------------------------------------------------------------------------------------|
| 6.35 | Ik verwacht dat mijn gezondheid achteruit zal gaan | <input type="radio"/> Volkomen juist<br><input type="radio"/> Grotendeels juist<br><input type="radio"/> Weet ik niet<br><input type="radio"/> Grotendeels onjuist<br><input type="radio"/> Volkomen onjuist |
| 6.36 | Mijn gezondheid is uitstekend                      | <input type="radio"/> Volkomen juist<br><input type="radio"/> Grotendeels juist<br><input type="radio"/> Weet ik niet<br><input type="radio"/> Grotendeels onjuist<br><input type="radio"/> Volkomen onjuist |

## Vragenlijst PRIMA studie 5 jaar - GAS

| Number | Question                                                                                                                                                                                  | Answers                                                                                                                                                                                                                                                                              |
|--------|-------------------------------------------------------------------------------------------------------------------------------------------------------------------------------------------|--------------------------------------------------------------------------------------------------------------------------------------------------------------------------------------------------------------------------------------------------------------------------------------|
|        | Tijdens de eerste afspraak werd een duidelijk doel met u afgesproken. Dit werd tevens per email naar u gestuurd. Hoe is de situatie nu ten aanzien van de destijds gestelde doelstelling? |                                                                                                                                                                                                                                                                                      |
| 7.1    | Wat is nu de situatie ten aanzien van het tijdens de eerste afspraak afgesproken doelstelling (Goal attainment Scaling)?                                                                  | <input type="radio"/> Achteruitgang (minder dan de uitgangssituatie)<br><input type="radio"/> Uitgangssituatie<br><input type="radio"/> Minder dan het doel<br><input type="radio"/> Doel<br><input type="radio"/> Meer dan het doel<br><input type="radio"/> Veel meer dan het doel |

## Vragenlijst PRIMA studie 5 jaar - EQ-5D-3L

| Number | Question                                                                                                                                                                                                                                                                                                                                                           | Answers                                                                                                                                                    |
|--------|--------------------------------------------------------------------------------------------------------------------------------------------------------------------------------------------------------------------------------------------------------------------------------------------------------------------------------------------------------------------|------------------------------------------------------------------------------------------------------------------------------------------------------------|
|        | Deze vragenlijst gaat over uw standpunten t.a.v. uw gezondheid. Met behulp van deze gegevens kan worden bijgehouden hoe u zich voelt en hoe goed u in staat bent uw gebruikelijke bezigheden uit te voeren. Beantwoord elke vraag door een antwoord aan te klikken. Als u niet zeker weet hoe u een vraag moet beantwoorden, geef dan het best mogelijke antwoord. |                                                                                                                                                            |
| 8.1    | Hoe is het met uw Mobiliteit gesteld?                                                                                                                                                                                                                                                                                                                              | <input type="radio"/> Ik heb geen problemen met lopen<br><input type="radio"/> Ik heb enige problemen met lopen<br><input type="radio"/> Ik ben bedlegerig |



8.2 Hoe is het met uw Zelfzorg gesteld?

Ik heb geen problemen om mijzelf te wassen of aan te kleden

Ik heb enige problemen om mijzelf te wassen of aan te kleden

Ik ben niet in staat om mijzelf te wassen of aan te kleden

8.3 Hoe is het met de Dagelijkse activiteiten (werk, studie, huishouden, gezins- en vrijetijdsactiviteiten) gesteld?

Ik heb geen problemen met mijn dagelijkse activiteiten

Ik heb enige problemen met mijn dagelijkse activiteiten

Ik ben niet in staat om mijn dagelijkse activiteiten uit te voeren

8.4 Hoe is het met de Pijn/klachten gesteld?

Ik heb geen pijn of andere klachten

Ik heb matige pijn of andere klachten

Ik heb zeer ernstige pijn of andere klachten

8.5 Hoe is het met de Stemming gesteld?

Ik ben niet angstig of somber

Ik ben matig angstig of somber

Ik ben erg angstig of somber

We willen weten hoe goed of slecht uw gezondheid VANDAAG is. Deze meetschaal loopt van 0 tot 100: 100 staat voor de BESTE gezondheid die u zich kunt voorstellen - 0 staat voor de SLECHTSTE gezondheid die u zich kunt voorstellen

8.6 Uw Gezondheid vandaag (0.00) (100.00)

## Vragenlijst PRIMA studie 5 jaar - AOS

| Number | Question                                                                                                                                                                                                                                                                                                                                                                                                      | Answers                                                                                            |
|--------|---------------------------------------------------------------------------------------------------------------------------------------------------------------------------------------------------------------------------------------------------------------------------------------------------------------------------------------------------------------------------------------------------------------|----------------------------------------------------------------------------------------------------|
|        | Instructies: De lijn naast elke vraag staat voor hoeveel PIJN u heeft in verschillende situaties. De linker kant (0) is "geen pijn" en de rechter kant (100) is "ergste pijn denkbaar". Geef voor de onderstaande situaties op de lijn aan hoeveel PIJN u in de afgelopen week in de enkel had. Als een of meerdere van deze situaties niet van toepassing waren, dan kiest u de "niet van toepassing" optie. |                                                                                                    |
| 9.1    | Wat was de hoogte van de ergste pijn in de afgelopen week?                                                                                                                                                                                                                                                                                                                                                    | (0.00) (100.00)                                                                                    |
| 9.2    | Heeft u pijn als u 's ochtends opstaat?                                                                                                                                                                                                                                                                                                                                                                       | <input type="radio"/> Ja<br><input type="radio"/> Nee<br><input type="radio"/> Niet van toepassing |

|       |                                                                                                                                                                                          |                                                                                                    |          |
|-------|------------------------------------------------------------------------------------------------------------------------------------------------------------------------------------------|----------------------------------------------------------------------------------------------------|----------|
| 9.2.1 | <b><i>If 'Heeft u pijn als u 's ochtends opstaat?' is equal to 'Ja' answer this question:</i></b><br>Hoeveel pijn heeft u voordat u 's ochtends opstaat?                                 | (0.00)                                                                                             | (100.00) |
| 9.3   | Heeft u pijn wanneer u op blote voeten loopt?                                                                                                                                            | <input type="radio"/> Ja<br><input type="radio"/> Nee<br><input type="radio"/> Niet van toepassing |          |
| 9.3.1 | <b><i>If 'Heeft u pijn wanneer u op blote voeten loopt?' is equal to 'Ja' answer this question:</i></b><br>Hoeveel pijn heeft u als u op blote voeten loopt?                             | (0.00)                                                                                             | (100.00) |
| 9.4   | Heeft u pijn wanneer u op blote voeten staat?                                                                                                                                            | <input type="radio"/> Ja<br><input type="radio"/> Nee<br><input type="radio"/> Niet van toepassing |          |
| 9.4.1 | <b><i>If 'Heeft u pijn wanneer u op blote voeten staat?' is equal to 'Ja' answer this question:</i></b><br>Hoeveel pijn heeft u als u op blote voeten staat?                             | (0.00)                                                                                             | (100.00) |
| 9.5   | Heeft u pijn wanneer u met schoenen loopt?                                                                                                                                               | <input type="radio"/> Ja<br><input type="radio"/> Nee<br><input type="radio"/> Niet van toepassing |          |
| 9.5.1 | <b><i>If 'Heeft u pijn wanneer u met schoenen loopt?' is equal to 'Ja' answer this question:</i></b><br>Hoeveel pijn heeft u wanneer u met schoenen loopt?                               | (0.00)                                                                                             | (100.00) |
| 9.6   | Heeft u pijn wanneer u met schoenen staat?                                                                                                                                               | <input type="radio"/> Ja<br><input type="radio"/> Nee<br><input type="radio"/> Niet van toepassing |          |
| 9.6.1 | <b><i>If 'Heeft u pijn wanneer u met schoenen staat?' is equal to 'Ja' answer this question:</i></b><br>Hoeveel pijn heeft u wanneer u met schoenen staat?                               | (0.00)                                                                                             | (100.00) |
| 9.7   | Heeft u pijn wanneer u loopt met steunzolen of een brace?                                                                                                                                | <input type="radio"/> Ja<br><input type="radio"/> Nee<br><input type="radio"/> Niet van toepassing |          |
| 9.7.1 | <b><i>If 'Heeft u pijn wanneer u loopt met steunzolen of een brace?' is equal to 'Ja' answer this question:</i></b><br>Hoeveel pijn heeft u wanneer u loopt met steunzolen of een brace? | (0.00)                                                                                             | (100.00) |

|                                                                                                                                                                                                                                                                                                                                                                                                                                                      |                                                                                                                                                                                   |                                                                                                    |
|------------------------------------------------------------------------------------------------------------------------------------------------------------------------------------------------------------------------------------------------------------------------------------------------------------------------------------------------------------------------------------------------------------------------------------------------------|-----------------------------------------------------------------------------------------------------------------------------------------------------------------------------------|----------------------------------------------------------------------------------------------------|
| 9.8                                                                                                                                                                                                                                                                                                                                                                                                                                                  | Heeft u pijn wanneer u staat met steunzolen of een brace?                                                                                                                         | <input type="radio"/> Ja<br><input type="radio"/> Nee<br><input type="radio"/> Niet van toepassing |
| 9.8.1                                                                                                                                                                                                                                                                                                                                                                                                                                                | <b>If 'Heeft u pijn wanneer u staat met steunzolen of een brace?' is equal to 'Ja' answer this question:</b><br>Hoeveel pijn heeft u wanneer u staat met steunzolen of een brace? | (0.00) (100.00)                                                                                    |
| 9.9                                                                                                                                                                                                                                                                                                                                                                                                                                                  | Heeft u pijn aan het einde van de dag?                                                                                                                                            | <input type="radio"/> Ja<br><input type="radio"/> Nee<br><input type="radio"/> Niet van toepassing |
| 9.9.1                                                                                                                                                                                                                                                                                                                                                                                                                                                | <b>If 'Heeft u pijn aan het einde van de dag?' is equal to 'Ja' answer this question:</b><br>Hoeveel pijn heeft u aan het einde van de dag?                                       | (0.00) (100.00)                                                                                    |
| <p>Instructies:De lijn naast elke vraag staat voor hoeveel MOEITE u heeft met verschillende activiteiten. De linker kant (0) is "Niet moeilijk" en de rechter kant (100) is "Te moeilijk, niet uitvoerbaar". Geef voor de onderstaande activiteiten op de lijn aan hoeveel MOEITE u in de afgelopen week door enkelklachten had met onderstaande activiteiten. Als een situatie niet van toepassing is, kies dan de optie "niet van toepassing".</p> |                                                                                                                                                                                   |                                                                                                    |
| 9.10                                                                                                                                                                                                                                                                                                                                                                                                                                                 | Heeft u moeite met door het huis lopen?                                                                                                                                           | <input type="radio"/> Ja<br><input type="radio"/> Nee<br><input type="radio"/> Niet van toepassing |
| 9.10.1                                                                                                                                                                                                                                                                                                                                                                                                                                               | <b>If 'Heeft u moeite met door het huis lopen?' is equal to 'Ja' answer this question:</b><br>Hoeveel moeite heeft u met door het huis lopen?                                     | (0.00) (100.00)                                                                                    |
| 9.11                                                                                                                                                                                                                                                                                                                                                                                                                                                 | Heeft u moeite met buiten lopen op oneven ondergrond?                                                                                                                             | <input type="radio"/> Ja<br><input type="radio"/> Nee<br><input type="radio"/> Niet van toepassing |
| 9.11.1                                                                                                                                                                                                                                                                                                                                                                                                                                               | <b>If 'Heeft u moeite met buiten lopen op oneven ondergrond?' is equal to 'Ja' answer this question:</b><br>Hoeveel moeite heeft u met buiten lopen op oneven ondergrond?         | (0.00) (100.00)                                                                                    |
| 9.12                                                                                                                                                                                                                                                                                                                                                                                                                                                 | Heeft u moeite met een paar honderd meter lopen?                                                                                                                                  | <input type="radio"/> Ja<br><input type="radio"/> Nee<br><input type="radio"/> Niet van toepassing |
| 9.12.1                                                                                                                                                                                                                                                                                                                                                                                                                                               | <b>If 'Heeft u moeite met een paar honderd meter lopen?' is equal to 'Ja' answer this question:</b><br>Hoeveel moeite heeft u met een paar honderd meter lopen?                   | (0.00) (100.00)                                                                                    |

|        |                                                                                                                                                                                 |                                                                                                    |        |          |
|--------|---------------------------------------------------------------------------------------------------------------------------------------------------------------------------------|----------------------------------------------------------------------------------------------------|--------|----------|
| 9.13   | Heeft u moeite met een trap oplopen?                                                                                                                                            | <input type="radio"/> Ja<br><input type="radio"/> Nee<br><input type="radio"/> Niet van toepassing |        |          |
| 9.13.1 | <b>If 'Heeft u moeite met een trap oplopen?' is equal to 'Ja' answer this question:</b><br>Hoeveel moeite heeft u met een trap oplopen?                                         |                                                                                                    | (0.00) | (100.00) |
| 9.14   | Heeft u moeite met een trap aflopen?                                                                                                                                            | <input type="radio"/> Ja<br><input type="radio"/> Nee<br><input type="radio"/> Niet van toepassing |        |          |
| 9.14.1 | <b>If 'Heeft u moeite met een trap aflopen?' is equal to 'Ja' answer this question:</b><br>Hoeveel moeite heeft u met een trap aflopen?                                         |                                                                                                    | (0.00) | (100.00) |
| 9.15   | Heeft u moeite met op de tenen staan?                                                                                                                                           | <input type="radio"/> Ja<br><input type="radio"/> Nee<br><input type="radio"/> Niet van toepassing |        |          |
| 9.15.1 | <b>If 'Heeft u moeite met op de tenen staan?' is equal to 'Ja' answer this question:</b><br>Hoeveel moeite heeft u met op de tenen staan?                                       |                                                                                                    | (0.00) | (100.00) |
| 9.16   | Heeft u moeite met opstaan uit de stoel?                                                                                                                                        | <input type="radio"/> Ja<br><input type="radio"/> Nee<br><input type="radio"/> Niet van toepassing |        |          |
| 9.16.1 | <b>If 'Heeft u moeite met opstaan uit de stoel?' is equal to 'Ja' answer this question:</b><br>Hoeveel moeite heeft u met opstaan uit de stoel?                                 |                                                                                                    | (0.00) | (100.00) |
| 9.17   | Heeft u moeite met het op- of afstappen van stoepranden?                                                                                                                        | <input type="radio"/> Ja<br><input type="radio"/> Nee<br><input type="radio"/> Niet van toepassing |        |          |
| 9.17.1 | <b>If 'Heeft u moeite met het op- of afstappen van stoepranden?' is equal to 'Ja' answer this question:</b><br>Hoeveel moeite heeft u met het op- of afstappen van stoepranden? |                                                                                                    | (0.00) | (100.00) |
| 9.18   | Heeft u moeite met snel lopen of rennen?                                                                                                                                        | <input type="radio"/> Ja<br><input type="radio"/> Nee<br><input type="radio"/> Niet van toepassing |        |          |

9.18.1 **If 'Heeft u moeite met snel lopen of rennen?' is equal to 'Ja' answer this question:** (0.00) (100.00)  
 Hoeveel moeite heeft u met snel lopen of rennen?

## Vragenlijst PRIMA studie 5 jaar - FAOS

| Number                                                                                                                                                                                                                                                                                                                                                                                                                                                                                                                                                                                     | Question                                                                                             | Answers                                                                                                                                                    |
|--------------------------------------------------------------------------------------------------------------------------------------------------------------------------------------------------------------------------------------------------------------------------------------------------------------------------------------------------------------------------------------------------------------------------------------------------------------------------------------------------------------------------------------------------------------------------------------------|------------------------------------------------------------------------------------------------------|------------------------------------------------------------------------------------------------------------------------------------------------------------|
| <p>Deze lijst vraagt naar uw mening over uw voet/enkel. Uw antwoorden geven ons een beeld van uw voet/enkel klachten en hoe u in staat bent om alledaagse activiteiten uit te voeren in uw huidige situatie. Beantwoorden van een vraag doet u door het aanklikken van een vakje met het volgens u meest juiste antwoord (één vakje per vraag). Als u niet zeker weet hoe u een vraag moet beantwoorden, geeft u dan het antwoord dat volgens u het meest op uw situatie van toepassing is. Deze vraag heeft betrekking op het voorkomen van voet/enkel klachten in de afgelopen week.</p> |                                                                                                      |                                                                                                                                                            |
| 10.1                                                                                                                                                                                                                                                                                                                                                                                                                                                                                                                                                                                       | Is uw voet/enkel gezwollen?                                                                          | <input type="radio"/> Nooit <input type="radio"/> Zelden <input type="radio"/> Soms <input type="radio"/> Vaak <input type="radio"/> Altijd                |
| 10.2                                                                                                                                                                                                                                                                                                                                                                                                                                                                                                                                                                                       | Voelt u gekraak of hoort u klikken of een ander vreemd geluid wanneer u de voet/enkel beweegt?       | <input type="radio"/> Nooit <input type="radio"/> Zelden <input type="radio"/> Soms <input type="radio"/> Vaak <input type="radio"/> Altijd                |
| 10.3                                                                                                                                                                                                                                                                                                                                                                                                                                                                                                                                                                                       | Hapert uw enkel of blokkeert uw enkel ('op slot' gaan zitten) wanneer u deze beweegt?                | <input type="radio"/> Nooit <input type="radio"/> Zelden <input type="radio"/> Soms <input type="radio"/> Vaak <input type="radio"/> Altijd                |
| 10.4                                                                                                                                                                                                                                                                                                                                                                                                                                                                                                                                                                                       | Kunt u de voet/enkel volledig strekken?                                                              | <input type="radio"/> Altijd <input type="radio"/> Vaak <input type="radio"/> Soms <input type="radio"/> Zelden <input type="radio"/> Nooit                |
| 10.5                                                                                                                                                                                                                                                                                                                                                                                                                                                                                                                                                                                       | Kunt u de voet volledig naar u toe buigen?                                                           | <input type="radio"/> Altijd <input type="radio"/> Vaak <input type="radio"/> Soms <input type="radio"/> Zelden <input type="radio"/> Nooit                |
| 10.6                                                                                                                                                                                                                                                                                                                                                                                                                                                                                                                                                                                       | In welke mate heeft u een stijf gevoel in de voet/enkel 's ochtends bij het wakker worden?           | <input type="radio"/> Niet Ernstig <input type="radio"/> Mild <input type="radio"/> Matig <input type="radio"/> Zeer ernstig                               |
| 10.7                                                                                                                                                                                                                                                                                                                                                                                                                                                                                                                                                                                       | In welke mate heeft u een stijf gevoel in de voet/enkel na zitten, liggen of rusten later op de dag? | <input type="radio"/> Niet Ernstig <input type="radio"/> Mild <input type="radio"/> Matig <input type="radio"/> Zeer ernstig                               |
| 10.8                                                                                                                                                                                                                                                                                                                                                                                                                                                                                                                                                                                       | Hoe vaak heeft u pijn in uw voet/enkel?                                                              | <input type="radio"/> Nooit <input type="radio"/> Maandelijks <input type="radio"/> Wekelijks <input type="radio"/> Dagelijks <input type="radio"/> Altijd |

- 
- 10.9 Hoeveel voet/enkel pijn heeft u gehad in de afgelopen week bij draaien als uw voet/enkel op de grond staat?
- Geen  
 Mild  
 Matig  
 Ernstig  
 Zeer ernstig
- 
- 10.10 Hoeveel voet/enkel pijn heeft u gehad in de afgelopen week bij het volledig uitstrekken van de voet/enkel?
- Geen  
 Mild  
 Matig  
 Ernstig  
 Zeer ernstig
- 
- 10.11 Hoeveel voet/enkel pijn heeft u gehad in de afgelopen week bij het volledig naar u toe buigen/optrekken van de voet/enkel
- Geen  
 Mild  
 Matig  
 Ernstig  
 Zeer ernstig
- 
- 10.12 Hoeveel voet/enkel pijn heeft u gehad in de afgelopen week bij het lopen op een vlakke ondergrond
- Geen  
 Mild  
 Matig  
 Ernstig  
 Zeer ernstig
- 
- 10.13 Hoeveel voet/enkel pijn heeft u gehad in de afgelopen week bij het trap op- en trap af lopen?
- Geen  
 Mild  
 Matig  
 Ernstig  
 Zeer ernstig
- 
- 10.14 Hoeveel voet/enkel pijn heeft u gehad in de afgelopen week 's nachts in bed?
- Geen  
 Mild  
 Matig  
 Ernstig  
 Zeer ernstig
- 
- 10.15 Hoeveel voet/enkel pijn heeft u gehad in de afgelopen week bij het zitten of liggen?
- Geen  
 Mild  
 Matig  
 Ernstig  
 Zeer ernstig

|       |                                                                                                                        |                                    |                            |                             |                                    |                                    |
|-------|------------------------------------------------------------------------------------------------------------------------|------------------------------------|----------------------------|-----------------------------|------------------------------------|------------------------------------|
| 10.16 | Hoeveel voet/enkel pijn heeft u gehad in de afgelopen week bij het rechtop staan?                                      | <input type="radio"/> Geen         | <input type="radio"/> Mild | <input type="radio"/> Matig | <input type="radio"/> Ernstig      | <input type="radio"/> Zeer ernstig |
| 10.17 | In welke mate werd u gehinderd bij het trap aflopen?                                                                   | <input type="radio"/> Niet Ernstig | <input type="radio"/> Mild | <input type="radio"/> Matig | <input type="radio"/> Zeer ernstig | <input type="radio"/>              |
| 10.18 | In welke mate werd u gehinderd bij het trap op lopen?                                                                  | <input type="radio"/> Niet Ernstig | <input type="radio"/> Mild | <input type="radio"/> Matig | <input type="radio"/> Zeer ernstig | <input type="radio"/>              |
| 10.19 | In welke mate werd u gehinderd als u vanuit een zittende positie ging staan?                                           | <input type="radio"/> Niet Ernstig | <input type="radio"/> Mild | <input type="radio"/> Matig | <input type="radio"/> Zeer ernstig | <input type="radio"/>              |
| 10.20 | In welke mate werd u gehinderd bij het staan?                                                                          | <input type="radio"/> Niet Ernstig | <input type="radio"/> Mild | <input type="radio"/> Matig | <input type="radio"/> Zeer ernstig | <input type="radio"/>              |
| 10.21 | In welke mate werd u gehinderd bij het naar de grond buigen/iets oprapen?                                              | <input type="radio"/> Niet Ernstig | <input type="radio"/> Mild | <input type="radio"/> Matig | <input type="radio"/> Zeer ernstig | <input type="radio"/>              |
| 10.22 | In welke mate werd u gehinderd bij het lopen op een vlakke ondergrond?                                                 | <input type="radio"/> Niet Ernstig | <input type="radio"/> Mild | <input type="radio"/> Matig | <input type="radio"/> Zeer ernstig | <input type="radio"/>              |
| 10.23 | In welke mate werd u gehinderd bij het in- en uit de auto stappen?                                                     | <input type="radio"/> Niet Ernstig | <input type="radio"/> Mild | <input type="radio"/> Matig | <input type="radio"/> Zeer ernstig | <input type="radio"/>              |
| 10.24 | In welke mate werd u gehinderd bij het boodschappen doen?                                                              | <input type="radio"/> Niet Ernstig | <input type="radio"/> Mild | <input type="radio"/> Matig | <input type="radio"/> Zeer ernstig | <input type="radio"/>              |
| 10.25 | In welke mate werd u gehinderd bij sokken/panty's aantrekken?                                                          | <input type="radio"/> Niet Ernstig | <input type="radio"/> Mild | <input type="radio"/> Matig | <input type="radio"/> Zeer ernstig | <input type="radio"/>              |
| 10.26 | In welke mate werd u gehinderd bij het opstaan uit bed?                                                                | <input type="radio"/> Niet Ernstig | <input type="radio"/> Mild | <input type="radio"/> Matig | <input type="radio"/> Zeer ernstig | <input type="radio"/>              |
| 10.27 | In welke mate werd u gehinderd bij het sokken uittrekken?                                                              | <input type="radio"/> Niet Ernstig | <input type="radio"/> Mild | <input type="radio"/> Matig | <input type="radio"/> Zeer ernstig | <input type="radio"/>              |
| 10.28 | In welke mate werd u gehinderd bij het in bed liggen (omdraaien, lange tijd uw voet/enkel in dezelfde positie houden)? | <input type="radio"/> Niet Ernstig | <input type="radio"/> Mild | <input type="radio"/> Matig | <input type="radio"/> Zeer ernstig | <input type="radio"/>              |

|       |                                                                                                                  |                                                                                                                                                                        |
|-------|------------------------------------------------------------------------------------------------------------------|------------------------------------------------------------------------------------------------------------------------------------------------------------------------|
| 10.29 | In welke mate werd u gehinderd bij het in/uit bad stappen?                                                       | <input type="radio"/> Niet<br><input type="radio"/> Mild<br><input type="radio"/> Matig<br><input type="radio"/> Ernstig<br><input type="radio"/> Zeer ernstig         |
| 10.30 | In welke mate werd u gehinderd bij zitten?                                                                       | <input type="radio"/> Niet<br><input type="radio"/> Mild<br><input type="radio"/> Matig<br><input type="radio"/> Ernstig<br><input type="radio"/> Zeer ernstig         |
| 10.31 | In welke mate werd u gehinderd bij het toilet op en af gaan?                                                     | <input type="radio"/> Niet<br><input type="radio"/> Mild<br><input type="radio"/> Matig<br><input type="radio"/> Ernstig<br><input type="radio"/> Zeer ernstig         |
| 10.32 | In welke mate werd u gehinderd bij zwaar huishoudelijk werk (bijvoorbeeld zware dozen sjouwen, vloer schrobben)? | <input type="radio"/> Niet<br><input type="radio"/> Mild<br><input type="radio"/> Matig<br><input type="radio"/> Ernstig<br><input type="radio"/> Zeer ernstig         |
| 10.33 | In welke mate werd u gehinderd bij licht huishoudelijk werk (bijvoorbeeld koken, afstoffen)?                     | <input type="radio"/> Niet<br><input type="radio"/> Mild<br><input type="radio"/> Matig<br><input type="radio"/> Ernstig<br><input type="radio"/> Zeer ernstig         |
| 10.34 | In welke mate werd u gehinderd bij hurken?                                                                       | <input type="radio"/> Niet<br><input type="radio"/> Mild<br><input type="radio"/> Matig<br><input type="radio"/> Ernstig<br><input type="radio"/> Zeer ernstig         |
| 10.35 | In welke mate werd u gehinderd bij hardlopen?                                                                    | <input type="radio"/> Niet<br><input type="radio"/> Mild<br><input type="radio"/> Matig<br><input type="radio"/> Ernstig<br><input type="radio"/> Zeer ernstig         |
| 10.36 | In welke mate werd u gehinderd bij springen?                                                                     | <input type="radio"/> Niet<br><input type="radio"/> Mild<br><input type="radio"/> Matig<br><input type="radio"/> Ernstig<br><input type="radio"/> Zeer ernstig         |
| 10.37 | In welke mate werd u gehinderd bij ronddraaien op uw aangedane voet/enkel?                                       | <input type="radio"/> Niet<br><input type="radio"/> Mild<br><input type="radio"/> Matig<br><input type="radio"/> Ernstig<br><input type="radio"/> Zeer ernstig         |
| 10.38 | In welke mate werd u gehinderd bij knielen?                                                                      | <input type="radio"/> Niet<br><input type="radio"/> Mild<br><input type="radio"/> Matig<br><input type="radio"/> Ernstig<br><input type="radio"/> Zeer ernstig         |
| 10.39 | Hoe vaak bent u zich bewust van uw voet/enkel probleem?                                                          | <input type="radio"/> Nooit<br><input type="radio"/> Wekelijks<br><input type="radio"/> Maandelijks<br><input type="radio"/> Dagelijks<br><input type="radio"/> Altijd |
| 10.40 | Heeft u uw leven veranderd om activiteiten te vermijden die schadelijk kunnen zijn voor uw voet/enkel?           | <input type="radio"/> Niet<br><input type="radio"/> Enigszins<br><input type="radio"/> Matig<br><input type="radio"/> Behoorlijk<br><input type="radio"/> Volledig     |



- 10.41 In hoeverre kunt u op uw voet/enkel vertrouwen?
- Volledig
- Behoorlijk
- Matig
- Enigzins
- Niet

- 10.42 In het algemeen, in welke mate ondervindt u hinder van uw voet/enkel
- Geen
- Mild
- Matig
- Ernstig
- Zeer ernstig

## Vragenlijst PRIMA studie 5 jaar - Dank

| Number | Question                                                                                                                                      | Answers                                                                  |
|--------|-----------------------------------------------------------------------------------------------------------------------------------------------|--------------------------------------------------------------------------|
| 11.1   | Hartelijk dank voor de tijd die u heeft genomen om de vragenlijsten in te vullen. Indien u nog opmerkingen heeft kunt u deze hierin plaatsen. | <div style="border: 1px dashed black; width: 100%; height: 50px;"></div> |

## Survey 'Vragenlijst PRIMA studie 52 weken'

### Vragenlijst PRIMA studie 52 weken - AOFAS - Pijn

| Number | Question                            | Answers                                                                                                                                                                                                         |
|--------|-------------------------------------|-----------------------------------------------------------------------------------------------------------------------------------------------------------------------------------------------------------------|
| 1.1    | Hoeveel pijn ervaart u aan uw voet? | <input type="checkbox"/> Geen<br><input type="checkbox"/> Milde pijnklachten of af en toe pijn<br><input type="checkbox"/> Matige pijnklachten, dagelijks<br><input type="checkbox"/> Vrijwel continu erge pijn |

### Vragenlijst PRIMA studie 52 weken - AOFAS resterende gedeelte

| Number | Question                                                                                                                   | Answers                                                                                                                                                                                                                                                                                                                                                                                                                                              |
|--------|----------------------------------------------------------------------------------------------------------------------------|------------------------------------------------------------------------------------------------------------------------------------------------------------------------------------------------------------------------------------------------------------------------------------------------------------------------------------------------------------------------------------------------------------------------------------------------------|
| 2.1    | Hoeveel beperkingen in het dagelijks leven ervaart u?                                                                      | <input type="radio"/> Geen beperkingen, geen hulpmiddelen nodig<br><input type="radio"/> Geen beperkingen in algemeen dagelijkse bezigheden, wel beperkingen in recreatieve activiteiten (sport, hobbies, etc) geen ondersteuning<br><input type="radio"/> Beperkingen bij dagelijkse- en recreatieve activiteiten, stok<br><input type="radio"/> Ernstige beperkingen bij dagelijkse- en recreatieve activiteiten, walker, krukken, rolstoel, brace |
| 2.2    | Wat is de afstand die u in één keer kunt lopen?                                                                            | <input type="radio"/> Meer dan 600 meter<br><input type="radio"/> 400 - 600 meter<br><input type="radio"/> 100 - 300 meter<br><input type="radio"/> Minder dan 100 meter                                                                                                                                                                                                                                                                             |
| 2.3    | Heeft u moeite met lopen op een bepaalde ondergrond?                                                                       | <input type="radio"/> Geen problemen bij lopen<br><input type="radio"/> Enig problemen op ongelijke ondergrond, trap, helling, ladders<br><input type="radio"/> Ernstige problemen bij ongelijke ondergrond, trap, helling, ladders                                                                                                                                                                                                                  |
| 2.4    | Hoe zou u uw looppatroon beoordelen?                                                                                       | <input type="radio"/> Normaal of minimaal afwijkend<br><input type="radio"/> Duidelijk<br><input type="radio"/> Ernstig                                                                                                                                                                                                                                                                                                                              |
| 2.5    | Hoe zou u de beweeglijkheid van uw voet beoordelen ten opzichte van de andere zijde of ten opzichte van vóór het ongeval?  | <input type="radio"/> Hetzelfde of licht beperkt t.o.v. de niet aangedane zijde of zoals voor het ongeval<br><input type="radio"/> Ongeveer de helft beperkt<br><input type="radio"/> Sterk verminderd, bijna geen bewegingen mogelijk                                                                                                                                                                                                               |
| 2.6    | Hoe zou u de beweeglijkheid van uw enkel beoordelen ten opzichte van de andere zijde of ten opzichte van voor het ongeval? | <input type="radio"/> Hetzelfde of licht beperkt t.o.v. de niet aangedane zijde of zoals voor het ongeval<br><input type="radio"/> Ongeveer de helft beperkt<br><input type="radio"/> Sterk verminderd, bijna geen bewegingen mogelijk                                                                                                                                                                                                               |
| 2.7    | Hoe zou u de stabiliteit van uw voet en enkel beoordelen                                                                   | <input type="radio"/> Stabiel, ik verzwik mijn enkel hooguit incidenteel<br><input type="radio"/> Niet stabiel, ik verzwik mijn enkel vaak                                                                                                                                                                                                                                                                                                           |

- 2.8 Hoe zou u de stand van uw voet beoordelen ten opzichte van de andere zijde of ten opzichte van voor het ongeval?
- Goed, ik kan mijn voet goed plat op de grond zetten, waarbij de stand niet afwijkend is
- Ik sta vrijwel alleen op de buitenzijde van mijn voet
- Ik kan mijn voet niet plat op de grond zetten en loop vrijwel alleen op mijn voorvoet

## Vragenlijst PRIMA studie 52 weken - VAS Pain score

| Number | Question                                                                                                                                                             | Answers             |
|--------|----------------------------------------------------------------------------------------------------------------------------------------------------------------------|---------------------|
| 3.1    | VAS pijnscore (Geef uw minimaal pijnscore aan tijdens dagelijkse activiteiten op een schaal van 0 tot 100, waarbij 0 geen pijn is en 100 de ergste pijn denkbaar is) | (0.00) 100 (100.00) |

## Vragenlijst PRIMA studie 52 weken - AAS

| Number | Question | Answers |
|--------|----------|---------|
|--------|----------|---------|

- 
- 4.1 Wat is het meest bij u van toepassing ten aanzien van uw activiteit?
- American Football
  - Basketbal
  - Gymnastiek/turnen
  - Handbal
  - Rugby
  - Voetbal
  - Hockey
  - Korfbal
  - Gevechtssporten: judo, karate, kung fu, taekwando, jiu jitsu, etc.
  - Oriëntatiewandelen
  - Rhythmische gymnastiek
  - Volleybal
  - Boxen
  - Freestyle snowboarden
  - Ijshockey
  - Tennis
  - Worstelen
  - Fitness, aerobics
  - Badminton
  - Baseball
  - Cross-country hardlopen
  - Moderne pentathlon
  - Squash
  - Surfen, windsurfen
  - Tafel tennis
  - Atletiek: spring-, werponderdelen
  - Waterskieën
  - Dans
  - Schermen
  - Zaalhockey
  - Bergbeklimmen
  - Langlauf
  - Parachute springen
  - Softball
  - Speciale beroepen en werkactiviteiten; speciale beroepen: ballet, professioneel soldaat, speciale reddingswerker, stuntman, etc.
  - Duiken
  - Scubaduiken
  - Skaten, in-line skaten
  - Atletiek: looponderdelen
  - Triatlon
  - Gewichtsheffen, body-building
-

- Alle competitieve sporten hieronder met 'seasonal' conditioning
- Zwaar fysiek werk
- Alpine skiën en snowboarden
- Bowlen/curlen
- Golf
- Mountainbike/BMX
- Powerliften
- Zeilen
- Fysiek werk
- Wielrennen
- Paardrijden
- Motorsporten/technische sporten
- Roeien, kayakken
- Boogschieten
- Water polo en zwemmen
- Kunnen lopen op oneven grond
- Geen sport, echter geen limitatie in dagelijkse activiteiten
- Kunnen lopen op even grond, maar de dagelijkse activiteiten zijn gelimiteerd
- Niet kunnen lopen, fysieke handicap wegens enkelproblemen

- 
- |       |                                                                                                                                                                    |                                                                                                              |
|-------|--------------------------------------------------------------------------------------------------------------------------------------------------------------------|--------------------------------------------------------------------------------------------------------------|
| 4.1.1 | <b><i>If 'Wat is het meest bij u van toepassing ten aanzien van uw activiteit?' is equal to 'American Football' answer this question:</i></b><br>American Football | <input type="radio"/> Professioneel<br><input type="radio"/> Competitief<br><input type="radio"/> Recreatief |
| <hr/> |                                                                                                                                                                    |                                                                                                              |
| 4.1.2 | <b><i>If 'Wat is het meest bij u van toepassing ten aanzien van uw activiteit?' is equal to 'Basketbal' answer this question:</i></b><br>Basketbal                 | <input type="radio"/> Professioneel<br><input type="radio"/> Competitief<br><input type="radio"/> Recreatief |
| <hr/> |                                                                                                                                                                    |                                                                                                              |
| 4.1.3 | <b><i>If 'Wat is het meest bij u van toepassing ten aanzien van uw activiteit?' is equal to 'Gymnastiek/turnen' answer this question:</i></b><br>Gymnastiek/turnen | <input type="radio"/> Professioneel<br><input type="radio"/> Competitief<br><input type="radio"/> Recreatief |
| <hr/> |                                                                                                                                                                    |                                                                                                              |
| 4.1.4 | <b><i>If 'Wat is het meest bij u van toepassing ten aanzien van uw activiteit?' is equal to 'Handbal' answer this question:</i></b><br>Handbal                     | <input type="radio"/> Professioneel<br><input type="radio"/> Competitief<br><input type="radio"/> Recreatief |
| <hr/> |                                                                                                                                                                    |                                                                                                              |
| 4.1.5 | <b><i>If 'Wat is het meest bij u van toepassing ten aanzien van uw activiteit?' is equal to 'Rugby' answer this question:</i></b><br>Rugby                         | <input type="radio"/> Professioneel<br><input type="radio"/> Competitief<br><input type="radio"/> Recreatief |

|        |                                                                                                                                                                                                                                                               |                                                                                                              |
|--------|---------------------------------------------------------------------------------------------------------------------------------------------------------------------------------------------------------------------------------------------------------------|--------------------------------------------------------------------------------------------------------------|
| 4.1.6  | <b>If 'Wat is het meest bij u van toepassing ten aanzien van uw acitviteit?' is equal to 'Voetbal' answer this question:</b><br>Voetbal                                                                                                                       | <input type="radio"/> Professioneel<br><input type="radio"/> Competitief<br><input type="radio"/> Recreatief |
| 4.1.7  | <b>If 'Wat is het meest bij u van toepassing ten aanzien van uw acitviteit?' is equal to 'Hockey' answer this question:</b><br>Hockey                                                                                                                         | <input type="radio"/> Professioneel<br><input type="radio"/> Competitief<br><input type="radio"/> Recreatief |
| 4.1.8  | <b>If 'Wat is het meest bij u van toepassing ten aanzien van uw acitviteit?' is equal to 'Korfbal' answer this question:</b><br>Korfbal                                                                                                                       | <input type="radio"/> Professioneel<br><input type="radio"/> Competitief<br><input type="radio"/> Recreatief |
| 4.1.9  | <b>If 'Wat is het meest bij u van toepassing ten aanzien van uw acitviteit?' is equal to 'Gevechtssporten: judo, karate, kung fu, taekwando, jiu jitsu, etc.' answer this question:</b><br>Gevechtssporten: judo, karate, kung fu, taekwando, jiu jitsu, etc. | <input type="radio"/> Professioneel<br><input type="radio"/> Competitief<br><input type="radio"/> Recreatief |
| 4.1.10 | <b>If 'Wat is het meest bij u van toepassing ten aanzien van uw acitviteit?' is equal to 'Oriëntatielopen' answer this question:</b><br>Oriëntatielopen                                                                                                       | <input type="radio"/> Professioneel<br><input type="radio"/> Competitief<br><input type="radio"/> Recreatief |
| 4.1.11 | <b>If 'Wat is het meest bij u van toepassing ten aanzien van uw acitviteit?' is equal to 'Rhythmische gymnastiek' answer this question:</b><br>Rhythmisch gymnastiek                                                                                          | <input type="radio"/> Professioneel<br><input type="radio"/> Competitief<br><input type="radio"/> Recreatief |
| 4.1.12 | <b>If 'Wat is het meest bij u van toepassing ten aanzien van uw acitviteit?' is equal to 'Volleybal' answer this question:</b><br>Volleybal                                                                                                                   | <input type="radio"/> Professioneel<br><input type="radio"/> Competitief<br><input type="radio"/> Recreatief |
| 4.1.13 | <b>If 'Wat is het meest bij u van toepassing ten aanzien van uw acitviteit?' is equal to 'Boxen' answer this question:</b><br>Boxen                                                                                                                           | <input type="radio"/> Professioneel<br><input type="radio"/> Competitief<br><input type="radio"/> Recreatief |
| 4.1.14 | <b>If 'Wat is het meest bij u van toepassing ten aanzien van uw acitviteit?' is equal to 'Freestyle snowboarden' answer this question:</b><br>Freestyle snowboarden                                                                                           | <input type="radio"/> Professioneel<br><input type="radio"/> Competitief<br><input type="radio"/> Recreatief |
| 4.1.15 | <b>If 'Wat is het meest bij u van toepassing ten aanzien van uw acitviteit?' is equal to 'Freestyle snowboarden' answer this question:</b><br>Ijshockey                                                                                                       | <input type="radio"/> Professioneel<br><input type="radio"/> Competitief<br><input type="radio"/> Recreatief |

|        |                                                                                                                                                                         |                                                                                                              |
|--------|-------------------------------------------------------------------------------------------------------------------------------------------------------------------------|--------------------------------------------------------------------------------------------------------------|
| 4.1.16 | <b>If 'Wat is het meest bij u van toepassing ten aanzien van uw acitviteit?' is equal to 'Tennis' answer this question:</b><br>Tennis                                   | <input type="radio"/> Professioneel<br><input type="radio"/> Competitief<br><input type="radio"/> Recreatief |
| 4.1.17 | <b>If 'Wat is het meest bij u van toepassing ten aanzien van uw acitviteit?' is equal to 'Worstelen' answer this question:</b><br>Worstelen                             | <input type="radio"/> Professioneel<br><input type="radio"/> Competitief<br><input type="radio"/> Recreatief |
| 4.1.18 | <b>If 'Wat is het meest bij u van toepassing ten aanzien van uw acitviteit?' is equal to 'Fitness, aerobics' answer this question:</b><br>Fitness, aerobics             | <input type="radio"/> Professioneel<br><input type="radio"/> Competitief<br><input type="radio"/> Recreatief |
| 4.1.19 | <b>If 'Wat is het meest bij u van toepassing ten aanzien van uw acitviteit?' is equal to 'Badminton' answer this question:</b><br>Badminton                             | <input type="radio"/> Professioneel<br><input type="radio"/> Competitief<br><input type="radio"/> Recreatief |
| 4.1.20 | <b>If 'Wat is het meest bij u van toepassing ten aanzien van uw acitviteit?' is equal to 'Baseball' answer this question:</b><br>Baseball                               | <input type="radio"/> Professioneel<br><input type="radio"/> Competitief<br><input type="radio"/> Recreatief |
| 4.1.21 | <b>If 'Wat is het meest bij u van toepassing ten aanzien van uw acitviteit?' is equal to 'Cross-country hardlopen' answer this question:</b><br>Cross-country hardlopen | <input type="radio"/> Professioneel<br><input type="radio"/> Competitief<br><input type="radio"/> Recreatief |
| 4.1.22 | <b>If 'Wat is het meest bij u van toepassing ten aanzien van uw acitviteit?' is equal to 'Moderne pentathlon' answer this question:</b><br>Moderne pentathlon           | <input type="radio"/> Professioneel<br><input type="radio"/> Competitief<br><input type="radio"/> Recreatief |
| 4.1.23 | <b>If 'Wat is het meest bij u van toepassing ten aanzien van uw acitviteit?' is equal to 'Squash' answer this question:</b><br>Squash                                   | <input type="radio"/> Professioneel<br><input type="radio"/> Competitief<br><input type="radio"/> Recreatief |
| 4.1.24 | <b>If 'Wat is het meest bij u van toepassing ten aanzien van uw acitviteit?' is equal to 'Surfen, windsurfen' answer this question:</b><br>Surfen, windsurfen           | <input type="radio"/> Professioneel<br><input type="radio"/> Competitief<br><input type="radio"/> Recreatief |
| 4.1.25 | <b>If 'Wat is het meest bij u van toepassing ten aanzien van uw acitviteit?' is equal to 'Tafel tennis' answer this question:</b><br>Tafel tennis                       | <input type="radio"/> Professioneel<br><input type="radio"/> Competitief<br><input type="radio"/> Recreatief |

|        |                                                                                                                                                                                             |                                                                                                              |
|--------|---------------------------------------------------------------------------------------------------------------------------------------------------------------------------------------------|--------------------------------------------------------------------------------------------------------------|
| 4.1.26 | <b>If 'Wat is het meest bij u van toepassing ten aanzien van uw activiteit?' is equal to 'Atletiek: spring-, werponderdelen' answer this question:</b><br>Atletiek: spring-, werponderdelen | <input type="radio"/> Professioneel<br><input type="radio"/> Competitief<br><input type="radio"/> Recreatief |
| 4.1.27 | <b>If 'Wat is het meest bij u van toepassing ten aanzien van uw activiteit?' is equal to 'Waterskieën' answer this question:</b><br>Waterskien                                              | <input type="radio"/> Professioneel<br><input type="radio"/> Competitief<br><input type="radio"/> Recreatief |
| 4.1.28 | <b>If 'Wat is het meest bij u van toepassing ten aanzien van uw activiteit?' is equal to 'Dans' answer this question:</b><br>Dans                                                           | <input type="radio"/> Professioneel<br><input type="radio"/> Competitief<br><input type="radio"/> Recreatief |
| 4.1.29 | <b>If 'Wat is het meest bij u van toepassing ten aanzien van uw activiteit?' is equal to 'Schermen' answer this question:</b><br>Schermen                                                   | <input type="radio"/> Professioneel<br><input type="radio"/> Competitief<br><input type="radio"/> Recreatief |
| 4.1.30 | <b>If 'Wat is het meest bij u van toepassing ten aanzien van uw activiteit?' is equal to 'Zaalhockey' answer this question:</b><br>Zaalhockey                                               | <input type="radio"/> Professioneel<br><input type="radio"/> Competitief<br><input type="radio"/> Recreatief |
| 4.1.31 | <b>If 'Wat is het meest bij u van toepassing ten aanzien van uw activiteit?' is equal to 'Bergbeklimmen' answer this question:</b><br>Bergbeklimmen                                         | <input type="radio"/> Professioneel<br><input type="radio"/> Competitief<br><input type="radio"/> Recreatief |
| 4.1.32 | <b>If 'Wat is het meest bij u van toepassing ten aanzien van uw activiteit?' is equal to 'Langlauf' answer this question:</b><br>Langlauf                                                   | <input type="radio"/> Professioneel<br><input type="radio"/> Competitief<br><input type="radio"/> Recreatief |
| 4.1.33 | <b>If 'Wat is het meest bij u van toepassing ten aanzien van uw activiteit?' is equal to 'Parachute springen' answer this question:</b><br>Parachute springen                               | <input type="radio"/> Professioneel<br><input type="radio"/> Competitief<br><input type="radio"/> Recreatief |
| 4.1.34 | <b>If 'Wat is het meest bij u van toepassing ten aanzien van uw activiteit?' is equal to 'Softball' answer this question:</b><br>Softball                                                   | <input type="radio"/> Professioneel<br><input type="radio"/> Competitief<br><input type="radio"/> Recreatief |



|        |                                                                                                                                                                                                                                                                                                                                                                                                     |                                                                                              |
|--------|-----------------------------------------------------------------------------------------------------------------------------------------------------------------------------------------------------------------------------------------------------------------------------------------------------------------------------------------------------------------------------------------------------|----------------------------------------------------------------------------------------------|
| 4.1.35 | <p><b>If 'Wat is het meest bij u van toepassing ten aanzien van uw activiteit?' is equal to 'Speciale beroepen en werkactiviteiten; speciale beroepen: ballet, professioneel soldaat, speciale reddingswerker, stuntman, etc.' answer this question:</b></p> <p>Speciale beroepen en werkactiviteiten speciale beroepen: ballet, professioneel soldaat, speciale reddingswerker, stuntman, etc.</p> | <input type="radio"/> ballet, professioneel soldaat, speciale reddingswerker, stuntman, etc. |
| 4.1.36 | <p><b>If 'Wat is het meest bij u van toepassing ten aanzien van uw activiteit?' is equal to 'Duiken' answer this question:</b></p> <p>Duiken</p>                                                                                                                                                                                                                                                    | <input type="radio"/> Professioneel/competitief<br><input type="radio"/> Recreatief          |
| 4.1.37 | <p><b>If 'Wat is het meest bij u van toepassing ten aanzien van uw activiteit?' is equal to 'Scubaduiken' answer this question:</b></p> <p>Scubaduiken</p>                                                                                                                                                                                                                                          | <input type="radio"/> Professioneel/competitief<br><input type="radio"/> Recreatief          |
| 4.1.38 | <p><b>If 'Wat is het meest bij u van toepassing ten aanzien van uw activiteit?' is equal to 'Skaten, in-line skaten' answer this question:</b></p> <p>skaten, in-linen skaten</p>                                                                                                                                                                                                                   | <input type="radio"/> Professioneel/competitief<br><input type="radio"/> Recreatief          |
| 4.1.39 | <p><b>If 'Wat is het meest bij u van toepassing ten aanzien van uw activiteit?' is equal to 'Atletiek: looponderdelen' answer this question:</b></p> <p>Atletiek: looponderdelen</p>                                                                                                                                                                                                                | <input type="radio"/> Professioneel/competitief<br><input type="radio"/> Recreatief          |
| 4.1.40 | <p><b>If 'Wat is het meest bij u van toepassing ten aanzien van uw activiteit?' is equal to 'Triatlon' answer this question:</b></p> <p>triatlon</p>                                                                                                                                                                                                                                                | <input type="radio"/> Professioneel/competitief<br><input type="radio"/> Recreatief          |
| 4.1.41 | <p><b>If 'Wat is het meest bij u van toepassing ten aanzien van uw activiteit?' is equal to 'Gewichtsheffen, body-building' answer this question:</b></p> <p>Gewichtsheffen, body-building</p>                                                                                                                                                                                                      | <input type="radio"/> Professioneel/competitief<br><input type="radio"/> Recreatief          |
| 4.1.42 | <p><b>If 'Wat is het meest bij u van toepassing ten aanzien van uw activiteit?' is equal to 'Alle competitieve sporten hieronder met 'seasonal' conditioning' answer this question:</b></p> <p>Alle competitieve sporten hieronder met 'seasonal' conditioning</p>                                                                                                                                  | <input type="radio"/> Alle competitieve sporten hieronder met 'seasonal' conditioning        |
| 4.1.43 | <p><b>If 'Wat is het meest bij u van toepassing ten aanzien van uw activiteit?' is equal to 'Zwaar fysiek werk' answer this question:</b></p> <p>Zwaar fysiek werk</p>                                                                                                                                                                                                                              | <input type="radio"/> Alle competitieve sporten hieronder met 'seasonal' conditioning        |

|        |                                                                                                                                                                                         |                                                       |
|--------|-----------------------------------------------------------------------------------------------------------------------------------------------------------------------------------------|-------------------------------------------------------|
| 4.1.44 | <b>If 'Wat is het meest bij u van toepassing ten aanzien van uw activiteit?' is equal to 'Alpine skiën en snowboarden' answer this question:</b><br>Alpine skien en snowboarden         | <input type="radio"/> Alpine skien en snowboarden     |
| 4.1.45 | <b>If 'Wat is het meest bij u van toepassing ten aanzien van uw activiteit?' is equal to 'Bowlen/curlen' answer this question:</b><br>Bowlen/curlen                                     | <input type="radio"/> Bowlen/curlen                   |
| 4.1.46 | <b>If 'Wat is het meest bij u van toepassing ten aanzien van uw activiteit?' is equal to 'Golf' answer this question:</b><br>Golf                                                       | <input type="radio"/> Golf                            |
| 4.1.47 | <b>If 'Wat is het meest bij u van toepassing ten aanzien van uw activiteit?' is equal to 'Mountainbike/BMX' answer this question:</b><br>Mountainbike/BMX                               | <input type="radio"/> Mountainbike/BMX                |
| 4.1.48 | <b>If 'Wat is het meest bij u van toepassing ten aanzien van uw activiteit?' is equal to 'Powerliften' answer this question:</b><br>Powerliften                                         | <input type="radio"/> Powerliften                     |
| 4.1.49 | <b>If 'Wat is het meest bij u van toepassing ten aanzien van uw activiteit?' is equal to 'Zeilen' answer this question:</b><br>Zeilen                                                   | <input type="radio"/> Zeilen                          |
| 4.1.50 | <b>If 'Wat is het meest bij u van toepassing ten aanzien van uw activiteit?' is equal to 'Fysiek werk' answer this question:</b><br>Fysiek werk                                         | <input type="radio"/> Fysiek werk                     |
| 4.1.51 | <b>If 'Wat is het meest bij u van toepassing ten aanzien van uw activiteit?' is equal to 'Wielrennen' answer this question:</b><br>Wielrennen                                           | <input type="radio"/> Wielrennen                      |
| 4.1.52 | <b>If 'Wat is het meest bij u van toepassing ten aanzien van uw activiteit?' is equal to 'Paardrijden' answer this question:</b><br>Paardrijden                                         | <input type="radio"/> Paardrijden                     |
| 4.1.53 | <b>If 'Wat is het meest bij u van toepassing ten aanzien van uw activiteit?' is equal to 'Motorsporten/technische sporten' answer this question:</b><br>Motorsporten/technische sporten | <input type="radio"/> Motorsporten/technische sporten |
| 4.1.54 | <b>If 'Wat is het meest bij u van toepassing ten aanzien van uw activiteit?' is equal to 'Roeien, kayakken' answer this question:</b><br>Roeien, kayakken                               | <input type="radio"/> Roeien, kayakken                |

|        |                                                                                                                                                                                                                                                                                   |                                                                                                    |
|--------|-----------------------------------------------------------------------------------------------------------------------------------------------------------------------------------------------------------------------------------------------------------------------------------|----------------------------------------------------------------------------------------------------|
| 4.1.55 | <b>If 'Wat is het meest bij u van toepassing ten aanzien van uw activiteit?' is equal to 'Boogschieten' answer this question:</b><br>Boogschieten                                                                                                                                 | <input type="radio"/> Boogschieten                                                                 |
| 4.1.56 | <b>If 'Wat is het meest bij u van toepassing ten aanzien van uw activiteit?' is equal to 'Water polo en zwemmen' answer this question:</b><br>Water polo en zwemmen                                                                                                               | <input type="radio"/> Water polo en zwemmen                                                        |
| 4.1.57 | <b>If 'Wat is het meest bij u van toepassing ten aanzien van uw activiteit?' is equal to 'Kunnen lopen op oneven grond' answer this question:</b><br>Kunnen lopen op oneven grond                                                                                                 | <input type="radio"/> Kunnen lopen op oneven grond                                                 |
| 4.1.58 | <b>If 'Wat is het meest bij u van toepassing ten aanzien van uw activiteit?' is equal to 'Geen sport, echter geen limitatie in dagelijkse activiteiten' answer this question:</b><br>Geen sport, echter geen limitatie in dagelijkse activiteiten                                 | <input type="radio"/> Geen sport, echter geen limitatie in dagelijkse activiteiten                 |
| 4.1.59 | <b>If 'Wat is het meest bij u van toepassing ten aanzien van uw activiteit?' is equal to 'Kunnen lopen op even grond, maar de dagelijkse activiteiten zijn gelimiteerd' answer this question:</b><br>Kunnen lopen op even grond, maar de dagelijkse activiteiten zijn gelimiteerd | <input type="radio"/> Kunnen lopen op even grond, maar de dagelijkse activiteiten zijn gelimiteerd |
| 4.1.60 | <b>If 'Wat is het meest bij u van toepassing ten aanzien van uw activiteit?' is equal to 'Niet kunnen lopen, fysieke handicap wegens enkelproblemen' answer this question:</b><br>Niet kunnen lopen, fysieke handicap wegens enkelproblemen                                       | <input type="radio"/> Niet kunnen lopen, fysieke handicap wegens enkelproblemen                    |

## Vragenlijst PRIMA studie 52 weken - Hoe tevreden bent u over de enkelklachten?

| Number | Question                                   | Answers                                                                                                                       |
|--------|--------------------------------------------|-------------------------------------------------------------------------------------------------------------------------------|
| 5.1    | Hoe tevreden bent u over de enkelklachten? | <input type="radio"/> Slecht<br><input type="radio"/> Matig<br><input type="radio"/> Goed<br><input type="radio"/> Uitstekend |

## Vragenlijst PRIMA studie 52 weken - SF-36

| Number | Question                                                                                                                                                                                                                                                                                                                                                           | Answers                                                                                                                                                                                                                                                                                   |
|--------|--------------------------------------------------------------------------------------------------------------------------------------------------------------------------------------------------------------------------------------------------------------------------------------------------------------------------------------------------------------------|-------------------------------------------------------------------------------------------------------------------------------------------------------------------------------------------------------------------------------------------------------------------------------------------|
|        | Deze vragenlijst gaat over uw standpunten t.a.v. uw gezondheid. Met behulp van deze gegevens kan worden bijgehouden hoe u zich voelt en hoe goed u in staat bent uw gebruikelijke bezigheden uit te voeren. Beantwoord elke vraag door een antwoord aan te klikken. Als u niet zeker weet hoe u een vraag moet beantwoorden, geef dan het best mogelijke antwoord. |                                                                                                                                                                                                                                                                                           |
| 6.1    | Hoe zou u over het algemeen uw gezondheid noemen?                                                                                                                                                                                                                                                                                                                  | <input type="radio"/> Uitstekend <input type="radio"/> Zeer goed <input type="radio"/> Goed <input type="radio"/> Matig <input type="radio"/> Slecht                                                                                                                                      |
| 6.2    | Hoe beoordeelt u nu uw gezondheid over het algemeen vergeleken met een jaar geleden?                                                                                                                                                                                                                                                                               | <input type="radio"/> Veel beter dan een jaar geleden <input type="radio"/> Wat beter dan een jaar geleden <input type="radio"/> Ongeveer hetzelfde als een jaar geleden <input type="radio"/> Wat slechter dan een jaar geleden <input type="radio"/> Veel slechter dan een jaar geleden |
| 6.3    | Wordt u door uw gezondheid op dit moment beperkt bij forse inspanning, zoals hardlopen, tillen van zware voorwerpen of een veeleisende sport beoefenen?                                                                                                                                                                                                            | <input type="radio"/> Ja, ernstig beperkt <input type="radio"/> Ja, een beetje beperkt <input type="radio"/> Nee, helemaal niet beperkt                                                                                                                                                   |
| 6.4    | Wordt u door uw gezondheid op dit moment beperkt bij matige inspanning zoals een tafel verplaatsen, stofzuigen, zwemmen of fietsen?                                                                                                                                                                                                                                | <input type="radio"/> Ja, ernstig beperkt <input type="radio"/> Ja, een beetje beperkt <input type="radio"/> Nee, helemaal niet beperkt                                                                                                                                                   |
| 6.5    | Wordt u door uw gezondheid op dit moment beperkt bij boodschappen tillen of dragen?                                                                                                                                                                                                                                                                                | <input type="radio"/> Ja, ernstig beperkt <input type="radio"/> Ja, een beetje beperkt <input type="radio"/> Nee, helemaal niet beperkt                                                                                                                                                   |
| 6.6    | Wordt u door uw gezondheid op dit moment beperkt bij een paar trappen oplopen?                                                                                                                                                                                                                                                                                     | <input type="radio"/> Ja, ernstig beperkt <input type="radio"/> Ja, een beetje beperkt <input type="radio"/> Nee, helemaal niet beperkt                                                                                                                                                   |
| 6.7    | Wordt u door uw gezondheid op dit moment beperkt bij één trap oplopen?                                                                                                                                                                                                                                                                                             | <input type="radio"/> Ja, ernstig beperkt <input type="radio"/> Ja, een beetje beperkt <input type="radio"/> Nee, helemaal niet beperkt                                                                                                                                                   |
| 6.8    | Wordt u door uw gezondheid op dit moment beperkt bij bukken, knielen of hurken?                                                                                                                                                                                                                                                                                    | <input type="radio"/> Ja, ernstig beperkt <input type="radio"/> Ja, een beetje beperkt <input type="radio"/> Nee, helemaal niet beperkt                                                                                                                                                   |
| 6.9    | Wordt u door uw gezondheid op dit moment beperkt bij meer dan één kilometer lopen?                                                                                                                                                                                                                                                                                 | <input type="radio"/> Ja, ernstig beperkt <input type="radio"/> Ja, een beetje beperkt <input type="radio"/> Nee, helemaal niet beperkt                                                                                                                                                   |
| 6.10   | Wordt u door uw gezondheid op dit moment beperkt bij een paar honderd meter lopen?                                                                                                                                                                                                                                                                                 | <input type="radio"/> Ja, ernstig beperkt <input type="radio"/> Ja, een beetje beperkt <input type="radio"/> Nee, helemaal niet beperkt                                                                                                                                                   |

- 6.11 Wordt u door uw gezondheid op dit moment beperkt bij ongeveer honderd meter lopen?  Ja, ernstig beperkt  Ja, een beetje beperkt  Nee, helemaal niet beperkt
- 
- 6.12 Wordt u door uw gezondheid op dit moment beperkt bij uzelf wassen of aankleden?  Ja, ernstig beperkt  Ja, een beetje beperkt  Nee, helemaal niet beperkt
- 
- 6.13 U besteedde in de afgelopen 4 weken minder tijd aan werk of andere bezigheden  Ja  Nee
- 
- 6.14 U heeft in de afgelopen 4 weken minder bereikt dan u zou willen  Ja  Nee
- 
- 6.15 U was in de afgelopen 4 weken beperkt in het soort werk of andere bezigheden.  Ja  Nee
- 
- 6.16 U had de afgelopen 4 weken moeite om uw werk of andere bezigheden uit te voeren (het kostte u bijvoorbeeld extra inspanning).  Ja  Nee
- 
- 6.17 U besteedde in de afgelopen 4 weken minder tijd aan werk of andere bezigheden ten gevolge van emotionele problemen  Ja  Nee
- 
- 6.18 U heeft in de afgelopen 4 weken minder bereikt dan u zou willen ten gevolge van emotionele problemen.  Ja  Nee
- 
- 6.19 U deed de afgelopen 4 weken uw werk of andere bezigheden niet zo zorgvuldig als gewoonlijk ten gevolge van emotionele problemen.  Ja  Nee
- 
- 6.20 In hoeverre hebben uw lichamelijke gezondheid of emotionele problemen u gedurende de afgelopen 4 weken gehinderd in uw normale omgang met familie, vrienden of burens, of bij activiteiten in groepsverband?  Helemaal niet  Enigszins  Nogal  Veel  Heel erg veel
- 
- 6.21 Hoeveel lichamelijke pijn heeft u de afgelopen 4 weken gehad?  Geen  Heel licht  Licht  Nogal  Ernstig  Heel ernstig
- 
- 6.22 In welke mate bent u de afgelopen 4 weken door de pijn gehinderd in uw normale werk (zowel werk buitenshuis als huishoudelijk werk)?  Helemaal niet  Een klein beetje  Nogal  Veel  Heel erg veel

---

6.23      Voelde u zich levenslustig?

Altijd  
 Meestal  
 Vaak  
 Soms  
 Zelden  
 Nooit

---

6.24      Was u erg zenuwachtig?

Altijd  
 Meestal  
 Vaak  
 Soms  
 Zelden  
 Nooit

---

6.25      Zat u zo in de put dat u niets kon?

Altijd  
 Meestal  
 Vaak  
 Soms  
 Zelden  
 Nooit

---

6.26      Voelde u zich rustig en tevreden?

Altijd  
 Meestal  
 Vaak  
 Soms  
 Zelden  
 Nooit

---

6.27      Had u veel energie?

Altijd  
 Meestal  
 Vaak  
 Soms  
 Zelden  
 Nooit

---

6.28      Voelde u zich somber en neerslachtig?

Altijd  
 Meestal  
 Vaak  
 Soms  
 Zelden  
 Nooit

---

6.29 Voelde u zich uitgeput?

- Altijd
- Meestal
- Vaak
- Soms
- Zelden
- Nooit

---

6.30 Was u een gelukkig mens?

- Altijd
- Meestal
- Vaak
- Soms
- Zelden
- Nooit

---

6.31 Voelde u zich moe?

- Altijd
- Meestal
- Vaak
- Soms
- Zelden
- Nooit

---

6.32 Hoe vaak hebben uw lichamelijke gezondheid of emotionele problemen u gedurende de afgelopen 4 weken gehinderd bij uw sociale activiteiten (zoals vrienden of familie bezoeken etc.)?

- Altijd
- Meestal
- Soms
- Zelden
- Nooit

---

6.33 Ik lijk wat gemakkelijker ziek te worden dan andere mensen

- Volkomen juist
- Grotendeels juist
- Weet ik niet
- Grotendeels onjuist
- Volkomen onjuist

---

6.34 Ik ben even gezond als andere mensen die ik ken

- Volkomen juist
- Grotendeels juist
- Weet ik niet
- Grotendeels onjuist
- Volkomen onjuist

- |      |                                                    |                                                                                                                                                                                                              |
|------|----------------------------------------------------|--------------------------------------------------------------------------------------------------------------------------------------------------------------------------------------------------------------|
| 6.35 | Ik verwacht dat mijn gezondheid achteruit zal gaan | <input type="radio"/> Volkomen juist<br><input type="radio"/> Grotendeels juist<br><input type="radio"/> Weet ik niet<br><input type="radio"/> Grotendeels onjuist<br><input type="radio"/> Volkomen onjuist |
| 6.36 | Mijn gezondheid is uitstekend                      | <input type="radio"/> Volkomen juist<br><input type="radio"/> Grotendeels juist<br><input type="radio"/> Weet ik niet<br><input type="radio"/> Grotendeels onjuist<br><input type="radio"/> Volkomen onjuist |

## Vragenlijst PRIMA studie 52 weken - GAS

| Number | Question                                                                                                                                                                                  | Answers                                                                                                                                                                                                                                                                              |
|--------|-------------------------------------------------------------------------------------------------------------------------------------------------------------------------------------------|--------------------------------------------------------------------------------------------------------------------------------------------------------------------------------------------------------------------------------------------------------------------------------------|
|        | Tijdens de eerste afspraak werd een duidelijk doel met u afgesproken. Dit werd tevens per email naar u gestuurd. Hoe is de situatie nu ten aanzien van de destijds gestelde doelstelling? |                                                                                                                                                                                                                                                                                      |
| 7.1    | Wat is nu de situatie ten aanzien van het tijdens de eerste afspraak afgesproken doelstelling (Goal attainment Scaling)?                                                                  | <input type="radio"/> Achteruitgang (minder dan de uitgangssituatie)<br><input type="radio"/> Uitgangssituatie<br><input type="radio"/> Minder dan het doel<br><input type="radio"/> Doel<br><input type="radio"/> Meer dan het doel<br><input type="radio"/> Veel meer dan het doel |

## Vragenlijst PRIMA studie 52 weken - EQ-5D-3L

| Number | Question                                                                                                                                                                                                                                                                                                                                                           | Answers                                                                                                                                                    |
|--------|--------------------------------------------------------------------------------------------------------------------------------------------------------------------------------------------------------------------------------------------------------------------------------------------------------------------------------------------------------------------|------------------------------------------------------------------------------------------------------------------------------------------------------------|
|        | Deze vragenlijst gaat over uw standpunten t.a.v. uw gezondheid. Met behulp van deze gegevens kan worden bijgehouden hoe u zich voelt en hoe goed u in staat bent uw gebruikelijke bezigheden uit te voeren. Beantwoord elke vraag door een antwoord aan te klikken. Als u niet zeker weet hoe u een vraag moet beantwoorden, geef dan het best mogelijke antwoord. |                                                                                                                                                            |
| 8.1    | Hoe is het met uw Mobiliteit gesteld?                                                                                                                                                                                                                                                                                                                              | <input type="radio"/> Ik heb geen problemen met lopen<br><input type="radio"/> Ik heb enige problemen met lopen<br><input type="radio"/> Ik ben bedlegerig |



8.2 Hoe is het met uw Zelfzorg gesteld?

Ik heb geen problemen om mijzelf te wassen of aan te kleden

Ik heb enige problemen om mijzelf te wassen of aan te kleden

Ik ben niet in staat om mijzelf te wassen of aan te kleden

8.3 Hoe is het met de Dagelijkse activiteiten (werk, studie, huishouden, gezins- en vrijetijdsactiviteiten) gesteld?

Ik heb geen problemen met mijn dagelijkse activiteiten

Ik heb enige problemen met mijn dagelijkse activiteiten

Ik ben niet in staat om mijn dagelijkse activiteiten uit te voeren

8.4 Hoe is het met de Pijn/klachten gesteld?

Ik heb geen pijn of andere klachten

Ik heb matige pijn of andere klachten

Ik heb zeer ernstige pijn of andere klachten

8.5 Hoe is het met de Stemming gesteld?

Ik ben niet angstig of somber

Ik ben matig angstig of somber

Ik ben erg angstig of somber

We willen weten hoe goed of slecht uw gezondheid VANDAAG is. Deze meetschaal loopt van 0 tot 100: 100 staat voor de BESTE gezondheid die u zich kunt voorstellen - 0 staat voor de SLECHTSTE gezondheid die u zich kunt voorstellen

8.6 Uw Gezondheid vandaag (0.00) (100.00)

## Vragenlijst PRIMA studie 52 weken - AOS

| Number | Question                                                                                                                                                                                                                                                                                                                                                                                                      | Answers                                                                                            |
|--------|---------------------------------------------------------------------------------------------------------------------------------------------------------------------------------------------------------------------------------------------------------------------------------------------------------------------------------------------------------------------------------------------------------------|----------------------------------------------------------------------------------------------------|
|        | Instructies: De lijn naast elke vraag staat voor hoeveel PIJN u heeft in verschillende situaties. De linker kant (0) is "geen pijn" en de rechter kant (100) is "ergste pijn denkbaar". Geef voor de onderstaande situaties op de lijn aan hoeveel PIJN u in de afgelopen week in de enkel had. Als een of meerdere van deze situaties niet van toepassing waren, dan kiest u de "niet van toepassing" optie. |                                                                                                    |
| 9.1    | Wat was de hoogte van de ergste pijn in de afgelopen week?                                                                                                                                                                                                                                                                                                                                                    | (0.00) (100.00)                                                                                    |
| 9.2    | Heeft u pijn als u 's ochtends opstaat?                                                                                                                                                                                                                                                                                                                                                                       | <input type="radio"/> Ja<br><input type="radio"/> Nee<br><input type="radio"/> Niet van toepassing |

|       |                                                                                                                                                                                          |                                                                                                    |          |
|-------|------------------------------------------------------------------------------------------------------------------------------------------------------------------------------------------|----------------------------------------------------------------------------------------------------|----------|
| 9.2.1 | <b><i>If 'Heeft u pijn als u 's ochtends opstaat?' is equal to 'Ja' answer this question:</i></b><br>Hoeveel pijn heeft u voordat u 's ochtends opstaat?                                 | (0.00)                                                                                             | (100.00) |
| 9.3   | Heeft u pijn wanneer u op blote voeten loopt?                                                                                                                                            | <input type="radio"/> Ja<br><input type="radio"/> Nee<br><input type="radio"/> Niet van toepassing |          |
| 9.3.1 | <b><i>If 'Heeft u pijn wanneer u op blote voeten loopt?' is equal to 'Ja' answer this question:</i></b><br>Hoeveel pijn heeft u als u op blote voeten loopt?                             | (0.00)                                                                                             | (100.00) |
| 9.4   | Heeft u pijn wanneer u op blote voeten staat?                                                                                                                                            | <input type="radio"/> Ja<br><input type="radio"/> Nee<br><input type="radio"/> Niet van toepassing |          |
| 9.4.1 | <b><i>If 'Heeft u pijn wanneer u op blote voeten staat?' is equal to 'Ja' answer this question:</i></b><br>Hoeveel pijn heeft u als u op blote voeten staat?                             | (0.00)                                                                                             | (100.00) |
| 9.5   | Heeft u pijn wanneer u met schoenen loopt?                                                                                                                                               | <input type="radio"/> Ja<br><input type="radio"/> Nee<br><input type="radio"/> Niet van toepassing |          |
| 9.5.1 | <b><i>If 'Heeft u pijn wanneer u met schoenen loopt?' is equal to 'Ja' answer this question:</i></b><br>Hoeveel pijn heeft u wanneer u met schoenen loopt?                               | (0.00)                                                                                             | (100.00) |
| 9.6   | Heeft u pijn wanneer u met schoenen staat?                                                                                                                                               | <input type="radio"/> Ja<br><input type="radio"/> Nee<br><input type="radio"/> Niet van toepassing |          |
| 9.6.1 | <b><i>If 'Heeft u pijn wanneer u met schoenen staat?' is equal to 'Ja' answer this question:</i></b><br>Hoeveel pijn heeft u wanneer u met schoenen staat?                               | (0.00)                                                                                             | (100.00) |
| 9.7   | Heeft u pijn wanneer u loopt met steunzolen of een brace?                                                                                                                                | <input type="radio"/> Ja<br><input type="radio"/> Nee<br><input type="radio"/> Niet van toepassing |          |
| 9.7.1 | <b><i>If 'Heeft u pijn wanneer u loopt met steunzolen of een brace?' is equal to 'Ja' answer this question:</i></b><br>Hoeveel pijn heeft u wanneer u loopt met steunzolen of een brace? | (0.00)                                                                                             | (100.00) |

9.8 Heeft u pijn wanneer u staat met steunzolen of een brace?  Ja  
 Nee  
 Niet van toepassing

9.8.1 **If 'Heeft u pijn wanneer u staat met steunzolen of een brace?' is equal to 'Ja' answer this question:** (0.00) (100.00)  
Hoeveel pijn heeft u wanneer u staat met steunzolen of een brace?

9.9 Heeft u pijn aan het einde van de dag?  Ja  
 Nee  
 Niet van toepassing

9.9.1 **If 'Heeft u pijn aan het einde van de dag?' is equal to 'Ja' answer this question:** (0.00) (100.00)  
Hoeveel pijn heeft u aan het einde van de dag?

Instructies:De lijn naast elke vraag staat voor hoeveel MOEITE u heeft met verschillende activiteiten. De linker kant (0) is "Niet moeilijk" en de rechter kant (100) is "Te moeilijk, niet uitvoerbaar". Geef voor de onderstaande activiteiten op de lijn aan hoeveel MOEITE u in de afgelopen week door enkelklachten had met onderstaande activiteiten. Als een situatie niet van toepassing is, kies dan de optie "niet van toepassing".

9.10 Heeft u moeite met door het huis lopen?  Ja  
 Nee  
 Niet van toepassing

9.10.1 **If 'Heeft u moeite met door het huis lopen?' is equal to 'Ja' answer this question:** (0.00) (100.00)  
Hoeveel moeite heeft u met door het huis lopen?

9.11 Heeft u moeite met buiten lopen op oneven ondergrond?  Ja  
 Nee  
 Niet van toepassing

9.11.1 **If 'Heeft u moeite met buiten lopen op oneven ondergrond?' is equal to 'Ja' answer this question:** (0.00) (100.00)  
Hoeveel moeite heeft u met buiten lopen op oneven ondergrond?

9.12 Heeft u moeite met een paar honderd meter lopen?  Ja  
 Nee  
 Niet van toepassing

9.12.1 **If 'Heeft u moeite met een paar honderd meter lopen?' is equal to 'Ja' answer this question:** (0.00) (100.00)  
Hoeveel moeite heeft u met een paar honderd meter lopen?

|        |                                                                                                                                                                                 |                                                                                                    |          |
|--------|---------------------------------------------------------------------------------------------------------------------------------------------------------------------------------|----------------------------------------------------------------------------------------------------|----------|
| 9.13   | Heeft u moeite met een trap oplopen?                                                                                                                                            | <input type="radio"/> Ja<br><input type="radio"/> Nee<br><input type="radio"/> Niet van toepassing |          |
| 9.13.1 | <b>If 'Heeft u moeite met een trap oplopen?' is equal to 'Ja' answer this question:</b><br>Hoeveel moeite heeft u met een trap oplopen?                                         | (0.00)                                                                                             | (100.00) |
| 9.14   | Heeft u moeite met een trap aflopen?                                                                                                                                            | <input type="radio"/> Ja<br><input type="radio"/> Nee<br><input type="radio"/> Niet van toepassing |          |
| 9.14.1 | <b>If 'Heeft u moeite met een trap aflopen?' is equal to 'Ja' answer this question:</b><br>Hoeveel moeite heeft u met een trap aflopen?                                         | (0.00)                                                                                             | (100.00) |
| 9.15   | Heeft u moeite met op de tenen staan?                                                                                                                                           | <input type="radio"/> Ja<br><input type="radio"/> Nee<br><input type="radio"/> Niet van toepassing |          |
| 9.15.1 | <b>If 'Heeft u moeite met op de tenen staan?' is equal to 'Ja' answer this question:</b><br>Hoeveel moeite heeft u met op de tenen staan?                                       | (0.00)                                                                                             | (100.00) |
| 9.16   | Heeft u moeite met opstaan uit de stoel?                                                                                                                                        | <input type="radio"/> Ja<br><input type="radio"/> Nee<br><input type="radio"/> Niet van toepassing |          |
| 9.16.1 | <b>If 'Heeft u moeite met opstaan uit de stoel?' is equal to 'Ja' answer this question:</b><br>Hoeveel moeite heeft u met opstaan uit de stoel?                                 | (0.00)                                                                                             | (100.00) |
| 9.17   | Heeft u moeite met het op- of afstappen van stoepranden?                                                                                                                        | <input type="radio"/> Ja<br><input type="radio"/> Nee<br><input type="radio"/> Niet van toepassing |          |
| 9.17.1 | <b>If 'Heeft u moeite met het op- of afstappen van stoepranden?' is equal to 'Ja' answer this question:</b><br>Hoeveel moeite heeft u met het op- of afstappen van stoepranden? | (0.00)                                                                                             | (100.00) |
| 9.18   | Heeft u moeite met snel lopen of rennen?                                                                                                                                        | <input type="radio"/> Ja<br><input type="radio"/> Nee<br><input type="radio"/> Niet van toepassing |          |

9.18.1 **If 'Heeft u moeite met snel lopen of rennen?' is equal to 'Ja' answer this question:** (0.00) (100.00)  
Hoeveel moeite heeft u met snel lopen of rennen?

## Vragenlijst PRIMA studie 52 weken - FAOS

| Number                                                                                                                                                                                                                                                                                                                                                                                                                                                                                                                                                                                     | Question                                                                                             | Answers                                                                                                                                                    |
|--------------------------------------------------------------------------------------------------------------------------------------------------------------------------------------------------------------------------------------------------------------------------------------------------------------------------------------------------------------------------------------------------------------------------------------------------------------------------------------------------------------------------------------------------------------------------------------------|------------------------------------------------------------------------------------------------------|------------------------------------------------------------------------------------------------------------------------------------------------------------|
| <p>Deze lijst vraagt naar uw mening over uw voet/enkel. Uw antwoorden geven ons een beeld van uw voet/enkel klachten en hoe u in staat bent om alledaagse activiteiten uit te voeren in uw huidige situatie. Beantwoorden van een vraag doet u door het aanklikken van een vakje met het volgens u meest juiste antwoord (één vakje per vraag). Als u niet zeker weet hoe u een vraag moet beantwoorden, geeft u dan het antwoord dat volgens u het meest op uw situatie van toepassing is. Deze vraag heeft betrekking op het voorkomen van voet/enkel klachten in de afgelopen week.</p> |                                                                                                      |                                                                                                                                                            |
| 10.1                                                                                                                                                                                                                                                                                                                                                                                                                                                                                                                                                                                       | Is uw voet/enkel gezwollen?                                                                          | <input type="radio"/> Nooit <input type="radio"/> Zelden <input type="radio"/> Soms <input type="radio"/> Vaak <input type="radio"/> Altijd                |
| 10.2                                                                                                                                                                                                                                                                                                                                                                                                                                                                                                                                                                                       | Voelt u gekraak of hoort u klikken of een ander vreemd geluid wanneer u de voet/enkel beweegt?       | <input type="radio"/> Nooit <input type="radio"/> Zelden <input type="radio"/> Soms <input type="radio"/> Vaak <input type="radio"/> Altijd                |
| 10.3                                                                                                                                                                                                                                                                                                                                                                                                                                                                                                                                                                                       | Hapert uw enkel of blokkeert uw enkel ('op slot' gaan zitten) wanneer u deze beweegt?                | <input type="radio"/> Nooit <input type="radio"/> Zelden <input type="radio"/> Soms <input type="radio"/> Vaak <input type="radio"/> Altijd                |
| 10.4                                                                                                                                                                                                                                                                                                                                                                                                                                                                                                                                                                                       | Kunt u de voet/enkel volledig strekken?                                                              | <input type="radio"/> Altijd <input type="radio"/> Vaak <input type="radio"/> Soms <input type="radio"/> Zelden <input type="radio"/> Nooit                |
| 10.5                                                                                                                                                                                                                                                                                                                                                                                                                                                                                                                                                                                       | Kunt u de voet volledig naar u toe buigen?                                                           | <input type="radio"/> Altijd <input type="radio"/> Vaak <input type="radio"/> Soms <input type="radio"/> Zelden <input type="radio"/> Nooit                |
| 10.6                                                                                                                                                                                                                                                                                                                                                                                                                                                                                                                                                                                       | In welke mate heeft u een stijf gevoel in de voet/enkel 's ochtends bij het wakker worden?           | <input type="radio"/> Niet Ernstig <input type="radio"/> Mild <input type="radio"/> Matig <input type="radio"/> Zeer ernstig                               |
| 10.7                                                                                                                                                                                                                                                                                                                                                                                                                                                                                                                                                                                       | In welke mate heeft u een stijf gevoel in de voet/enkel na zitten, liggen of rusten later op de dag? | <input type="radio"/> Niet Ernstig <input type="radio"/> Mild <input type="radio"/> Matig <input type="radio"/> Zeer ernstig                               |
| 10.8                                                                                                                                                                                                                                                                                                                                                                                                                                                                                                                                                                                       | Hoe vaak heeft u pijn in uw voet/enkel?                                                              | <input type="radio"/> Nooit <input type="radio"/> Maandelijks <input type="radio"/> Wekelijks <input type="radio"/> Dagelijks <input type="radio"/> Altijd |

- 
- 10.9 Hoeveel voet/enkel pijn heeft u gehad in de afgelopen week bij draaien als uw voet/enkel op de grond staat?
- Geen  
 Mild  
 Matig  
 Ernstig  
 Zeer ernstig
- 
- 10.10 Hoeveel voet/enkel pijn heeft u gehad in de afgelopen week bij het volledig uitstrekken van de voet/enkel?
- Geen  
 Mild  
 Matig  
 Ernstig  
 Zeer ernstig
- 
- 10.11 Hoeveel voet/enkel pijn heeft u gehad in de afgelopen week bij het volledig naar u toe buigen/optrekken van de voet/enkel
- Geen  
 Mild  
 Matig  
 Ernstig  
 Zeer ernstig
- 
- 10.12 Hoeveel voet/enkel pijn heeft u gehad in de afgelopen week bij het lopen op een vlakke ondergrond
- Geen  
 Mild  
 Matig  
 Ernstig  
 Zeer ernstig
- 
- 10.13 Hoeveel voet/enkel pijn heeft u gehad in de afgelopen week bij het trap op- en trap af lopen?
- Geen  
 Mild  
 Matig  
 Ernstig  
 Zeer ernstig
- 
- 10.14 Hoeveel voet/enkel pijn heeft u gehad in de afgelopen week 's nachts in bed?
- Geen  
 Mild  
 Matig  
 Ernstig  
 Zeer ernstig
- 
- 10.15 Hoeveel voet/enkel pijn heeft u gehad in de afgelopen week bij het zitten of liggen?
- Geen  
 Mild  
 Matig  
 Ernstig  
 Zeer ernstig

|       |                                                                                                                        |                                    |                            |                             |                                    |                                    |
|-------|------------------------------------------------------------------------------------------------------------------------|------------------------------------|----------------------------|-----------------------------|------------------------------------|------------------------------------|
| 10.16 | Hoeveel voet/enkel pijn heeft u gehad in de afgelopen week bij het rechtop staan?                                      | <input type="radio"/> Geen         | <input type="radio"/> Mild | <input type="radio"/> Matig | <input type="radio"/> Ernstig      | <input type="radio"/> Zeer ernstig |
| 10.17 | In welke mate werd u gehinderd bij het trap aflopen?                                                                   | <input type="radio"/> Niet Ernstig | <input type="radio"/> Mild | <input type="radio"/> Matig | <input type="radio"/> Zeer ernstig | <input type="radio"/>              |
| 10.18 | In welke mate werd u gehinderd bij het trap op lopen?                                                                  | <input type="radio"/> Niet Ernstig | <input type="radio"/> Mild | <input type="radio"/> Matig | <input type="radio"/> Zeer ernstig | <input type="radio"/>              |
| 10.19 | In welke mate werd u gehinderd als u vanuit een zittende positie ging staan?                                           | <input type="radio"/> Niet Ernstig | <input type="radio"/> Mild | <input type="radio"/> Matig | <input type="radio"/> Zeer ernstig | <input type="radio"/>              |
| 10.20 | In welke mate werd u gehinderd bij het staan?                                                                          | <input type="radio"/> Niet Ernstig | <input type="radio"/> Mild | <input type="radio"/> Matig | <input type="radio"/> Zeer ernstig | <input type="radio"/>              |
| 10.21 | In welke mate werd u gehinderd bij het naar de grond buigen/iets oprapen?                                              | <input type="radio"/> Niet Ernstig | <input type="radio"/> Mild | <input type="radio"/> Matig | <input type="radio"/> Zeer ernstig | <input type="radio"/>              |
| 10.22 | In welke mate werd u gehinderd bij het lopen op een vlakke ondergrond?                                                 | <input type="radio"/> Niet Ernstig | <input type="radio"/> Mild | <input type="radio"/> Matig | <input type="radio"/> Zeer ernstig | <input type="radio"/>              |
| 10.23 | In welke mate werd u gehinderd bij het in- en uit de auto stappen?                                                     | <input type="radio"/> Niet Ernstig | <input type="radio"/> Mild | <input type="radio"/> Matig | <input type="radio"/> Zeer ernstig | <input type="radio"/>              |
| 10.24 | In welke mate werd u gehinderd bij het boodschappen doen?                                                              | <input type="radio"/> Niet Ernstig | <input type="radio"/> Mild | <input type="radio"/> Matig | <input type="radio"/> Zeer ernstig | <input type="radio"/>              |
| 10.25 | In welke mate werd u gehinderd bij sokken/panty's aantrekken?                                                          | <input type="radio"/> Niet Ernstig | <input type="radio"/> Mild | <input type="radio"/> Matig | <input type="radio"/> Zeer ernstig | <input type="radio"/>              |
| 10.26 | In welke mate werd u gehinderd bij het opstaan uit bed?                                                                | <input type="radio"/> Niet Ernstig | <input type="radio"/> Mild | <input type="radio"/> Matig | <input type="radio"/> Zeer ernstig | <input type="radio"/>              |
| 10.27 | In welke mate werd u gehinderd bij het sokken uittrekken?                                                              | <input type="radio"/> Niet Ernstig | <input type="radio"/> Mild | <input type="radio"/> Matig | <input type="radio"/> Zeer ernstig | <input type="radio"/>              |
| 10.28 | In welke mate werd u gehinderd bij het in bed liggen (omdraaien, lange tijd uw voet/enkel in dezelfde positie houden)? | <input type="radio"/> Niet Ernstig | <input type="radio"/> Mild | <input type="radio"/> Matig | <input type="radio"/> Zeer ernstig | <input type="radio"/>              |

|       |                                                                                                                  |                                                                                                                                                                    |
|-------|------------------------------------------------------------------------------------------------------------------|--------------------------------------------------------------------------------------------------------------------------------------------------------------------|
| 10.29 | In welke mate werd u gehinderd bij het in/uit bad stappen?                                                       | <input type="radio"/> Niet<br>Ernstig <input type="radio"/> Mild<br><input type="radio"/> Matig<br><input type="radio"/> Zeer ernstig                              |
| 10.30 | In welke mate werd u gehinderd bij zitten?                                                                       | <input type="radio"/> Niet<br>Ernstig <input type="radio"/> Mild<br><input type="radio"/> Matig<br><input type="radio"/> Zeer ernstig                              |
| 10.31 | In welke mate werd u gehinderd bij het toilet op en af gaan?                                                     | <input type="radio"/> Niet<br>Ernstig <input type="radio"/> Mild<br><input type="radio"/> Matig<br><input type="radio"/> Zeer ernstig                              |
| 10.32 | In welke mate werd u gehinderd bij zwaar huishoudelijk werk (bijvoorbeeld zware dozen sjouwen, vloer schrobben)? | <input type="radio"/> Niet<br>Ernstig <input type="radio"/> Mild<br><input type="radio"/> Matig<br><input type="radio"/> Zeer ernstig                              |
| 10.33 | In welke mate werd u gehinderd bij licht huishoudelijk werk (bijvoorbeeld koken, afstoffen)?                     | <input type="radio"/> Niet<br>Ernstig <input type="radio"/> Mild<br><input type="radio"/> Matig<br><input type="radio"/> Zeer ernstig                              |
| 10.34 | In welke mate werd u gehinderd bij hurken?                                                                       | <input type="radio"/> Niet<br>Ernstig <input type="radio"/> Mild<br><input type="radio"/> Matig<br><input type="radio"/> Zeer ernstig                              |
| 10.35 | In welke mate werd u gehinderd bij hardlopen?                                                                    | <input type="radio"/> Niet<br>Ernstig <input type="radio"/> Mild<br><input type="radio"/> Matig<br><input type="radio"/> Zeer ernstig                              |
| 10.36 | In welke mate werd u gehinderd bij springen?                                                                     | <input type="radio"/> Niet<br>Ernstig <input type="radio"/> Mild<br><input type="radio"/> Matig<br><input type="radio"/> Zeer ernstig                              |
| 10.37 | In welke mate werd u gehinderd bij rondraaien op uw aangedane voet/enkel?                                        | <input type="radio"/> Niet<br>Ernstig <input type="radio"/> Mild<br><input type="radio"/> Matig<br><input type="radio"/> Zeer ernstig                              |
| 10.38 | In welke mate werd u gehinderd bij knielen?                                                                      | <input type="radio"/> Niet<br>Ernstig <input type="radio"/> Mild<br><input type="radio"/> Matig<br><input type="radio"/> Zeer ernstig                              |
| 10.39 | Hoe vaak bent u zich bewust van uw voet/enkel probleem?                                                          | <input type="radio"/> Nooit<br>Wekelijks <input type="radio"/> Maandelijks<br><input type="radio"/> Dagelijks <input type="radio"/> Altijd                         |
| 10.40 | Heeft u uw leven veranderd om activiteiten te vermijden die schadelijk kunnen zijn voor uw voet/enkel?           | <input type="radio"/> Niet<br><input type="radio"/> Enigszins<br><input type="radio"/> Matig<br><input type="radio"/> Behoorlijk<br><input type="radio"/> Volledig |



- 10.41 In hoeverre kunt u op uw voet/enkel vertrouwen?
- Volledig
- Behoorlijk
- Matig
- Enigzins
- Niet

- 10.42 In het algemeen, in welke mate ondervindt u hinder van uw voet/enkel
- Geen
- Mild
- Matig
- Ernstig
- Zeer ernstig

## Vragenlijst PRIMA studie 52 weken - PRODISQ - Gezondheid en werk

| Number | Question                                                                                                                                                                                                                                                                               | Answers                                                                                                                                                                                                                                                                                                                                                                                                                                                                                                                                                                |
|--------|----------------------------------------------------------------------------------------------------------------------------------------------------------------------------------------------------------------------------------------------------------------------------------------|------------------------------------------------------------------------------------------------------------------------------------------------------------------------------------------------------------------------------------------------------------------------------------------------------------------------------------------------------------------------------------------------------------------------------------------------------------------------------------------------------------------------------------------------------------------------|
| 11.1   | Wat is uw leeftijd?                                                                                                                                                                                                                                                                    | <input type="text"/> jaar                                                                                                                                                                                                                                                                                                                                                                                                                                                                                                                                              |
| 11.2   | Wat is uw geslacht?                                                                                                                                                                                                                                                                    | <input type="radio"/> Man<br><input type="radio"/> Vrouw                                                                                                                                                                                                                                                                                                                                                                                                                                                                                                               |
| 11.3   | Wat is de hoogste opleiding die u heeft afgemaakt (Zoek uw hoogste opleiding en kruis het hokje daarvoor aan)?                                                                                                                                                                         | <input type="checkbox"/> Ik heb geen school of opleiding afgemaakt<br><input type="checkbox"/> Lagere school of basisschool<br><input type="checkbox"/> Huishoudschool, vbo, lbo, lts, leao of lhno<br><input type="checkbox"/> Mavo, mulo, ivo of vmbo<br><input type="checkbox"/> Mbo, mts, meao, mhno, inas of intas<br><input type="checkbox"/> Havo, vwo, hbs, mms, atheneum of gymnasium<br><input type="checkbox"/> Hbo, hts, heao of hhno<br><input type="checkbox"/> Universiteit<br><input type="checkbox"/> Ik heb een andere opleiding afgemaakt, namelijk |
| 11.3.1 | <p><b><i>If 'Wat is de hoogste opleiding die u heeft afgemaakt (Zoek uw hoogste opleiding en kruis het hokje daarvoor aan)?' is equal to 'Ik heb een andere opleiding afgemaakt, namelijk' answer this question:</i></b></p> <p>Wat is de hoogste opleiding die u heeft afgemaakt?</p> | <input type="text"/>                                                                                                                                                                                                                                                                                                                                                                                                                                                                                                                                                   |

|          |                                                                                                                                                                                                                                                                   |                                                                                                                                                                                                                                                                                                                                                                                                                                                  |
|----------|-------------------------------------------------------------------------------------------------------------------------------------------------------------------------------------------------------------------------------------------------------------------|--------------------------------------------------------------------------------------------------------------------------------------------------------------------------------------------------------------------------------------------------------------------------------------------------------------------------------------------------------------------------------------------------------------------------------------------------|
| 11.4     | Wat doet u in het dagelijks leven?                                                                                                                                                                                                                                | <input type="checkbox"/> Ik zit op school, ik studeer<br><input type="checkbox"/> Ik werk in loondienst<br><input type="checkbox"/> Ik ben zelfstandig ondernemer<br><input type="checkbox"/> Ik ben huisvrouw, huisman<br><input type="checkbox"/> Ik ben werkloos<br><input type="checkbox"/> Ik ben arbeidsongeschikt<br><input type="checkbox"/> Ik ben met pensioen of prepensioen<br><input type="checkbox"/> Ik doe iets anders, namelijk |
| 11.4.1   | <b>If 'Wat doet u in het dagelijks leven?' is equal to 'Ik ben arbeidsongeschikt' answer this question:</b><br>Wat doet u in het dagelijks leven?                                                                                                                 | <input type="text"/>                                                                                                                                                                                                                                                                                                                                                                                                                             |
| 11.4.2   | <b>If 'Wat doet u in het dagelijks leven?' is equal to 'Ik doe iets anders, namelijk' answer this question:</b><br>Wat doet u in het dagelijks leven?                                                                                                             | <input type="text"/>                                                                                                                                                                                                                                                                                                                                                                                                                             |
| 11.5     | Hebt u betaald werk?                                                                                                                                                                                                                                              | <input type="radio"/> Nee<br><input type="radio"/> Ja                                                                                                                                                                                                                                                                                                                                                                                            |
| 11.5.1   | <b>If 'Hebt u betaald werk?' is equal to 'Ja' answer this question:</b><br>Wat is uw beroep?                                                                                                                                                                      | <input type="text"/>                                                                                                                                                                                                                                                                                                                                                                                                                             |
| 11.5.2   | <b>If 'Hebt u betaald werk?' is equal to 'Ja' answer this question:</b><br>Hoeveel uur per week werkt u (Tel alleen de uren waarvoor u betaald wordt)?                                                                                                            | <input type="text"/> uren                                                                                                                                                                                                                                                                                                                                                                                                                        |
| 11.5.3   | <b>If 'Hebt u betaald werk?' is equal to 'Ja' answer this question:</b><br>Hoeveel dagen in de week werkt u?                                                                                                                                                      | <input type="text"/> Dagen                                                                                                                                                                                                                                                                                                                                                                                                                       |
| 11.5.4   | <b>If 'Hebt u betaald werk?' is equal to 'Ja' answer this question:</b><br>Bent u in de afgelopen 4 weken afwezig geweest van uw werk omdat u ziek was?                                                                                                           | <input type="radio"/> Nee<br><input type="radio"/> Ja                                                                                                                                                                                                                                                                                                                                                                                            |
| 11.5.4.1 | <b>If 'Bent u in de afgelopen 4 weken afwezig geweest van uw werk omdat u ziek was?' is equal to 'Ja' answer this question:</b><br>Bent u in de afgelopen 4 weken afwezig geweest van uw werk omdat u ziek was (Tel alleen de werkdagen in de afgelopen 4 weken)? | <input type="text"/> dagen afwezig geweest                                                                                                                                                                                                                                                                                                                                                                                                       |
| 11.5.4.2 | <b>If 'Bent u in de afgelopen 4 weken afwezig geweest van uw werk omdat u ziek was?' is equal to 'Ja' answer this question:</b><br>Was u langer dan de gehele periode van 4 weken afwezig van uw werk doordat u ziek was?                                         | <input type="radio"/> Nee<br><input type="radio"/> Ja                                                                                                                                                                                                                                                                                                                                                                                            |

|            |                                                                                                                                                                                                                                                                                                                                                                                                                 |                                                                                       |
|------------|-----------------------------------------------------------------------------------------------------------------------------------------------------------------------------------------------------------------------------------------------------------------------------------------------------------------------------------------------------------------------------------------------------------------|---------------------------------------------------------------------------------------|
| 11.5.4.2.1 | <b>If 'Was u langer dan de gehele periode van 4 weken afwezig van uw werk doordat u ziek was?' is equal to 'Ja' answer this question:</b><br>Wanneer heeft u zich ziek gemeld?                                                                                                                                                                                                                                  | <input type="text"/> <input type="text"/> <input type="text"/> (dd-mm-yyyy)           |
| 11.5.5     | <b>If 'Hebt u betaald werk?' is equal to 'Ja' answer this question:</b><br>Waren er in de afgelopen 4 weken, dagen waarop u wel gewerkt heeft, maar tijdens uw werk last had van lichamelijke of psychische problemen?                                                                                                                                                                                          | <input type="radio"/> Ja<br><input type="radio"/> Nee                                 |
| 11.5.5.1   | <b>If 'Waren er in de afgelopen 4 weken, dagen waarop u wel gewerkt heeft, maar tijdens uw werk last had van lichamelijke of psychische problemen?' is equal to 'Ja' answer this question:</b><br>Op hoeveel werkdagen had u tijdens uw werk last van uw lichamelijke of psychische problemen?                                                                                                                  | <input type="text"/> werkdagen                                                        |
| 11.5.5.2   | <b>If 'Waren er in de afgelopen 4 weken, dagen waarop u wel gewerkt heeft, maar tijdens uw werk last had van lichamelijke of psychische problemen?' is equal to 'Ja' answer this question:</b><br>Op de dagen dat u last had, kon u misschien niet zoveel werk doen als normaal. Hoeveel werk kon u op deze dagen gemiddeld doen?                                                                               | Ik kon op deze dagen niks doen (0.00)      Ik kon net zoveel doen als normaal (10.00) |
| 11.6       | Waren er dagen waarop u minder onbetaald werk kon doen door uw lichamelijke of psychische problemen?                                                                                                                                                                                                                                                                                                            | <input type="radio"/> Nee<br><input type="radio"/> Ja                                 |
| 11.6.1     | <b>If 'Waren er dagen waarop u minder onbetaald werk kon doen door uw lichamelijke of psychische problemen?' is equal to 'Ja' answer this question:</b><br>Op hoeveel dagen was dit zo?                                                                                                                                                                                                                         | <input type="text"/> Dagen                                                            |
| 11.6.2     | <b>If 'Waren er dagen waarop u minder onbetaald werk kon doen door uw lichamelijke of psychische problemen?' is equal to 'Ja' answer this question:</b><br>Stel dat iemand, bijvoorbeeld uw partner, familielid of een bekende, u op deze dagen had geholpen. En al het onbetaalde werk wat u niet kon doen, voor u had gedaan. Hoeveel uur was die persoon hier op deze dagen dan gemiddeld mee bezig geweest? | <input type="text"/> uur op deze dagen                                                |

## Vragenlijst PRIMA studie 52 weken - PRODISQ - Zorggebruik

| Number | Question | Answers |
|--------|----------|---------|
|--------|----------|---------|

Wij willen graag weten met welke dokters u in de afgelopen 3 maanden een afspraak had. Het gaat om afspraken voor uzelf. Ook andere zorgverleners tellen mee. Bijvoorbeeld de fysiotherapeut.

|        |                                                                                                                                                                                                                          |                                                       |
|--------|--------------------------------------------------------------------------------------------------------------------------------------------------------------------------------------------------------------------------|-------------------------------------------------------|
| 12.1   | Bent u in de afgelopen 3 maanden naar uw huisarts geweest?                                                                                                                                                               | <input type="radio"/> Nee<br><input type="radio"/> Ja |
| 12.1.1 | <b>If 'Bent u in de afgelopen 3 maanden naar uw huisarts geweest?' is equal to 'Ja' answer this question:</b><br>Hoeveel afspraken had u?                                                                                | <input type="text"/> afspraken                        |
| 12.2   | Bent u in de afgelopen 3 maanden in contact geweest met een maatschappelijk werker?                                                                                                                                      | <input type="radio"/> Nee<br><input type="radio"/> Ja |
| 12.2.1 | <b>If 'Bent u in de afgelopen 3 maanden in contact geweest met een maatschappelijk werker?' is equal to 'Ja' answer this question:</b><br>Hoeveel afspraken had u?                                                       | <input type="text"/> afspraken                        |
| 12.3   | Bent u in de afgelopen 3 maanden naar een fysiotherapeut geweest? Of een caesartherapeut, therapeut mensendieck of een manueel therapeut?                                                                                | <input type="radio"/> Nee<br><input type="radio"/> Ja |
| 12.3.1 | <b>If 'Bent u in de afgelopen 3 maanden naar een fysiotherapeut geweest? Of een caesartherapeut, therapeut mensendieck of een manueel therapeut?' is equal to 'Ja' answer this question:</b><br>Hoeveel afspraken had u? | <input type="text"/> afspraken                        |
| 12.4   | Bent u in de afgelopen 3 maanden naar een ergotherapeut geweest?                                                                                                                                                         | <input type="radio"/> Nee<br><input type="radio"/> Ja |
| 12.4.1 | <b>If 'Bent u in de afgelopen 3 maanden naar een ergotherapeut geweest?' is equal to 'Ja' answer this question:</b><br>Hoeveel afspraken had u?                                                                          | <input type="text"/> afspraken                        |
| 12.5   | Bent u in de afgelopen 3 maanden naar een logopedist geweest?                                                                                                                                                            | <input type="radio"/> Nee<br><input type="radio"/> Ja |
| 12.5.1 | <b>If 'Bent u in de afgelopen 3 maanden naar een logopedist geweest?' is equal to 'Ja' answer this question:</b><br>Hoeveel afspraken had u?                                                                             | <input type="text"/> afspraken                        |
| 12.6   | Bent u in de afgelopen 3 maanden naar een diëtist geweest?                                                                                                                                                               | <input type="radio"/> Nee<br><input type="radio"/> Ja |
| 12.6.1 | <b>If 'Bent u in de afgelopen 3 maanden naar een diëtist geweest?' is equal to 'Ja' answer this question:</b><br>Hoeveel afspraken had u?                                                                                | <input type="text"/> afspraken                        |

|           |                                                                                                                                                                                                                                                                           |                                                                                                                                                                                                                                                                                                     |
|-----------|---------------------------------------------------------------------------------------------------------------------------------------------------------------------------------------------------------------------------------------------------------------------------|-----------------------------------------------------------------------------------------------------------------------------------------------------------------------------------------------------------------------------------------------------------------------------------------------------|
| 12.7      | Bent u in de afgelopen 3 maanden naar een homeopaat geweest? Of een acupuncturist?                                                                                                                                                                                        | <input type="radio"/> Nee<br><input type="radio"/> Ja                                                                                                                                                                                                                                               |
| 12.7.1    | <b>If 'Bent u in de afgelopen 3 maanden naar een homeopaat geweest? Of een acupuncturist?' is equal to 'Ja' answer this question:</b><br>Hoeveel afspraken had u?                                                                                                         | <input type="text"/> afspraken                                                                                                                                                                                                                                                                      |
| 12.8      | Bent u in de afgelopen 3 maanden naar een psycholoog geweest? Of een psychotherapeut of psychiater?                                                                                                                                                                       | <input type="radio"/> Nee<br><input type="radio"/> Ja                                                                                                                                                                                                                                               |
| 12.8.1    | <b>If 'Bent u in de afgelopen 3 maanden naar een psycholoog geweest? Of een psychotherapeut of psychiater?' is equal to 'Ja' answer this question:</b><br>Hoeveel afspraken had u?                                                                                        | <input type="text"/> afspraken                                                                                                                                                                                                                                                                      |
| 12.9      | Heeft u in de afgelopen 3 maanden afspraken gehad met de bedrijfsarts?                                                                                                                                                                                                    | <input type="radio"/> Nee<br><input type="radio"/> Ja                                                                                                                                                                                                                                               |
| 12.9.1    | <b>If 'Heeft u in de afgelopen 3 maanden afspraken gehad met de bedrijfsarts?' is equal to 'Ja' answer this question:</b><br>Hoeveel afspraken had u?                                                                                                                     | <input type="text"/> afspraken                                                                                                                                                                                                                                                                      |
| 12.10     | Heeft u in de afgelopen 3 maanden hulp van de thuiszorg gehad?                                                                                                                                                                                                            | <input type="radio"/> Ja<br><input type="radio"/> Nee                                                                                                                                                                                                                                               |
| 12.10.1   | <b>If 'Heeft u in de afgelopen 3 maanden hulp van de thuiszorg gehad?' is equal to 'Ja' answer this question:</b><br>Wat voor hulp van de thuiszorg heeft u gehad in de afgelopen 3 maanden?                                                                              | <input type="checkbox"/> Huishoudelijke hulp; voorbeeld: stofzuigen, bed opmaken, boodschappen doen<br><input type="checkbox"/> Verzorging van uzelf; voorbeeld: hulp bij douchen of aankleden<br><input type="checkbox"/> Verpleging; voorbeeld: verband omdoen, medicijnen geven, bloeddruk meten |
| 12.10.1.1 | <b>If 'Wat voor hulp van de thuiszorg heeft u gehad in de afgelopen 3 maanden?' is equal to 'Huishoudelijke hulp; voorbeeld: stofzuigen, bed opmaken, boodschappen doen' answer this question:</b><br>Hoeveel weken heeft u deze thuiszorg gehad?<br>Huishoudelijke hulp: | <input type="text"/> weken in de afgelopen 3 maanden                                                                                                                                                                                                                                                |
| 12.10.1.2 | <b>If 'Wat voor hulp van de thuiszorg heeft u gehad in de afgelopen 3 maanden?' is equal to 'Verzorging van uzelf; voorbeeld: hulp bij douchen of aankleden' answer this question:</b><br>Hoeveel weken heeft u deze thuiszorg gehad?<br>Verzorging van uzelf:            | <input type="text"/> weken in de afgelopen 3 maanden                                                                                                                                                                                                                                                |

- 12.10.1.3 **If 'Wat voor hulp van de thuiszorg heeft u gehad in de afgelopen 3 maanden?' is equal to 'Verpleging; voorbeeld: verband omdoen, medicijnen geven, bloeddruk meten' answer this question:**  
Hoeveel weken heeft u deze thuiszorg gehad?  
Verpleging:  weken in de afgelopen 3 maanden
- 12.10.1.4 **If 'Wat voor hulp van de thuiszorg heeft u gehad in de afgelopen 3 maanden?' is equal to 'Huishoudelijke hulp; voorbeeld: stofzuigen, bed opmaken, boodschappen doen' answer this question:**  
Hoeveel uur thuiszorg kreeg u in deze weken gemiddeld? Huishoudelijke hulp: gemiddeld  uur in de week
- 12.10.1.5 **If 'Wat voor hulp van de thuiszorg heeft u gehad in de afgelopen 3 maanden?' is equal to 'Verzorging van uzelf; voorbeeld: hulp bij douchen of aankleden' answer this question:**  
Hoeveel uur thuiszorg kreeg u in deze weken gemiddeld? Verzorging van uzelf: gemiddeld  uur in de week
- 12.10.1.6 **If 'Wat voor hulp van de thuiszorg heeft u gehad in de afgelopen 3 maanden?' is equal to 'Verpleging; voorbeeld: verband omdoen, medicijnen geven, bloeddruk meten' answer this question:**  
Hoeveel uur thuiszorg kreeg u in deze weken gemiddeld? Verpleging: gemiddeld  uur in de week
- 12.11 Heeft u in de afgelopen 3 maanden medicijnen gebruikt?  Ja  Nee
- 12.11.1 **If 'Heeft u in de afgelopen 3 maanden medicijnen gebruikt?' is equal to 'Ja' answer this question:**  
Welke medicijnen heeft u in de afgelopen 3 maanden gebruikt?
- 12.12 Bent u in de afgelopen 3 maanden op de spoedeisende eerste hulp van een ziekenhuis geweest? (Een andere naam voor spoedeisende eerste hulp is EHBO)  Nee  Ja
- 12.12.1 **If 'Bent u in de afgelopen 3 maanden op de spoedeisende eerste hulp van een ziekenhuis geweest? (Een andere naam voor spoedeisende eerste hulp is EHBO)' is equal to 'Ja' answer this question:**  
Hoevaak bent u geweest?  keer
- 12.13 Bent u in de afgelopen 3 maanden met een ambulance naar het ziekenhuis gebracht? (Een andere naam voor ambulance is ziekenauto)  Nee  Ja

|         |                                                                                                                                                                                                                                                                                                                                                           |                                                                                                                                                                                                             |
|---------|-----------------------------------------------------------------------------------------------------------------------------------------------------------------------------------------------------------------------------------------------------------------------------------------------------------------------------------------------------------|-------------------------------------------------------------------------------------------------------------------------------------------------------------------------------------------------------------|
| 12.13.1 | <b>If 'Bent u in de afgelopen 3 maanden met een ambulance naar het ziekenhuis gebracht? (Een andere naam voor ambulance is ziekenauto)' is equal to 'Ja' answer this question:</b><br>Hoe vaak bent u naar het ziekenhuis gebracht?                                                                                                                       | <input type="text"/> keer                                                                                                                                                                                   |
| 12.14   | Had u in de afgelopen 3 maanden een afspraak bij de polikliniek van het ziekenhuis? (Het gaat om afspraken voor uzelf met een dokter. Bijvoorbeeld met de cardioloog, reumatoloog of neuroloog)                                                                                                                                                           | <input type="radio"/> Ja<br><input type="radio"/> Nee                                                                                                                                                       |
| 12.14.1 | <b>If 'Had u in de afgelopen 3 maanden een afspraak bij de polikliniek van het ziekenhuis? (Het gaat om afspraken voor uzelf met een dokter. Bijvoorbeeld met de cardioloog, reumatoloog of neuroloog)' is equal to 'Ja' answer this question:</b><br>Bij welke soorten dokters bent u in de afgelopen 3 maanden in het ziekenhuis geweest? En hoe vaak?  | <input type="text"/>                                                                                                                                                                                        |
| 12.15   | Bent u in de afgelopen 3 maanden overdag in het ziekenhuis geweest voor een behandeling? (U bleef dus niet slapen. U kwam bijvoorbeeld voor een bloedtransfusie, nierdialyse of chemokuur)                                                                                                                                                                | <input type="radio"/> Ja<br><input type="radio"/> Nee                                                                                                                                                       |
| 12.15.1 | <b>If 'Bent u in de afgelopen 3 maanden overdag in het ziekenhuis geweest voor een behandeling? (U bleef dus niet slapen. U kwam bijvoorbeeld voor een bloedtransfusie, nierdialyse of chemokuur)' is equal to 'Ja' answer this question:</b><br>Voor welke soort behandeling was dit?                                                                    | <input type="text"/>                                                                                                                                                                                        |
| 12.15.2 | <b>If 'Bent u in de afgelopen 3 maanden overdag in het ziekenhuis geweest voor een behandeling? (U bleef dus niet slapen. U kwam bijvoorbeeld voor een bloedtransfusie, nierdialyse of chemokuur)' is equal to 'Ja' answer this question:</b><br>Hoeveel keer moest u in de afgelopen 3 maanden voor deze behandelingen naar het ziekenhuis?              | <input type="text"/>                                                                                                                                                                                        |
| 12.16   | Bent u in de afgelopen 3 maanden ergens anders geweest voor een behandeling overdag? (U bleef dus niet slapen. U ging bijvoorbeeld naar de dagopvang van een woon-/zorgcentrum of een psychiatrische instelling. Of naar de dagbehandeling van een revalidatiecentrum)                                                                                    | <input type="radio"/> Ja<br><input type="radio"/> Nee                                                                                                                                                       |
| 12.16.1 | <b>If 'Bent u in de afgelopen 3 maanden ergens anders geweest voor een behandeling overdag? (U bleef dus niet slapen. U ging bijvoorbeeld naar de dagopvang van een woon-/zorgcentrum of een psychiatrische instelling. Of naar de dagbehandeling van een revalidatiecentrum)' is equal to 'Ja' answer this question:</b><br>Wat voor instelling was dit? | <input type="checkbox"/> Woon-/zorgcentrum<br><input type="checkbox"/> Revalidatiecentrum<br><input type="checkbox"/> Psychiatrische instelling<br><input type="checkbox"/> Een andere instelling, namelijk |

- |           |                                                                                                                                                                                                                                                                                                 |                                                       |
|-----------|-------------------------------------------------------------------------------------------------------------------------------------------------------------------------------------------------------------------------------------------------------------------------------------------------|-------------------------------------------------------|
| 12.16.1.1 | <b>If 'Wat voor instelling was dit?' is equal to 'Een andere instelling, namelijk' answer this question:</b><br>Wat voor instelling was dit?                                                                                                                                                    | <input type="text"/>                                  |
| 12.16.1.2 | <b>If 'Wat voor instelling was dit?' is equal to 'Woon-/zorgcentrum' answer this question:</b><br>Hoe vaak moest u hier in de afgelopen 3 maanden naartoe? Naar het woon-/zorgcentrum:                                                                                                          | <input type="text"/> keer in de afgelopen 3 maanden   |
| 12.16.1.3 | <b>If 'Wat voor instelling was dit?' is equal to 'Revalidatiecentrum' answer this question:</b><br>Hoe vaak moest u hier in de afgelopen 3 maanden naartoe? Naar het revalidatiecentrum:                                                                                                        | <input type="text"/> keer in de afgelopen 3 maanden   |
| 12.16.1.4 | <b>If 'Wat voor instelling was dit?' is equal to 'Psychiatrische instelling' answer this question:</b><br>Hoe vaak moest u hier in de afgelopen 3 maanden naartoe? Naar de psychiatrische instelling:                                                                                           | <input type="text"/> keer in de afgelopen 3 maanden   |
| 12.16.1.5 | <b>If 'Wat voor instelling was dit?' is equal to 'Een andere instelling, namelijk' answer this question:</b><br>Hoe vaak moest u hier in de afgelopen 3 maanden naartoe? Naar de andere instelling:                                                                                             | <input type="text"/> keer in de afgelopen 3 maanden   |
| 12.17     | Heeft u in de afgelopen 3 maanden weleens in het ziekenhuis gelegen? (U moest dus blijven slapen. Bijvoorbeeld omdat u geopereerd was en niet meteen naar huis kon)                                                                                                                             | <input type="radio"/> Ja<br><input type="radio"/> Nee |
| 12.17.1   | <b>If 'Heeft u in de afgelopen 3 maanden weleens in het ziekenhuis gelegen? (U moest dus blijven slapen. Bijvoorbeeld omdat u geopereerd was en niet meteen naar huis kon)' is equal to 'Ja' answer this question:</b><br>Hoe vaak heeft u in de afgelopen 3 maanden in het ziekenhuis gelegen? | <input type="text"/> keer in de afgelopen 3 maanden   |
| 12.17.2   | <b>If 'Heeft u in de afgelopen 3 maanden weleens in het ziekenhuis gelegen? (U moest dus blijven slapen. Bijvoorbeeld omdat u geopereerd was en niet meteen naar huis kon)' is equal to 'Ja' answer this question:</b><br>Hoe lang heeft u in het ziekenhuis gelegen?                           | <input type="text"/> dagen in de afgelopen 3 maanden  |
| 12.18     | Moest u in de afgelopen 3 maanden ergens anders blijven slapen voor uw gezondheid? (Bijvoorbeeld in een woon-/zorgcentrum, psychiatrische instelling of revalidatiecentrum)                                                                                                                     | <input type="radio"/> Ja<br><input type="radio"/> Nee |



- 12.18.1 **If 'Moest u in de afgelopen 3 maanden ergens anders blijven slapen voor uw gezondheid? (Bijvoorbeeld in een woon-/zorgcentrum, psychiatrische instelling of revalidatiecentrum)' is equal to 'Ja' answer this question:**  
Wat voor instelling was dit?
- Woon-/zorgcentrum  
 Revalidatiecentrum  
 Psychiatrische instelling  
 Een andere instelling, namelijk
- 
- 12.18.1.1 **If 'Wat voor instelling was dit?' is equal to 'Een andere instelling, namelijk' answer this question:**  
Een andere instelling, namelijk
- 
- 
- 12.18.1.2 **If 'Wat voor instelling was dit?' is equal to 'Woon-/zorgcentrum' answer this question:**  
Hoe lang bent u in deze instelling geweest? In het woon-/zorgcentrum:
- dagen in de afgelopen 3 maanden
- 
- 12.18.1.3 **If 'Wat voor instelling was dit?' is equal to 'Revalidatiecentrum' answer this question:**  
Hoe lang bent u in deze instelling geweest? In het revalidatiecentrum:
- dagen in de afgelopen 3 maanden
- 
- 12.18.1.4 **If 'Wat voor instelling was dit?' is equal to 'Psychiatrische instelling' answer this question:**  
Hoe lang bent u in deze instelling geweest? In de psychiatrische instelling:
- dagen in de afgelopen 3 maanden
- 
- 12.18.1.5 **If 'Wat voor instelling was dit?' is equal to 'Een andere instelling, namelijk' answer this question:**  
Hoe lang bent u in deze instelling geweest? In de andere instelling:
- dagen in de afgelopen 3 maanden
- 
- 12.19 Heeft u in de afgelopen 3 maanden hulp gekregen van een familielid of een bekende vanwege uw lichamelijke of psychische problemen?
- Ja  
 Nee
- 
- 12.19.1 **If 'Heeft u in de afgelopen 3 maanden hulp gekregen van een familielid of een bekende vanwege uw lichamelijke of psychische problemen?' is equal to 'Ja' answer this question:**  
Wat voor hulp van familieleden of bekenden heeft u gehad in de afgelopen 3 maanden?
- Huishoudelijke hulp - voorbeeld: stofzuigen, bed opmaken, boodschappen doen, klaarmaken van eten en drinken, verzorgen van kinderen  
 Verzorging van uzelf - voorbeeld: hulp bij douchen of aankleden, hulp bij het eten en drinken of het geven van medicijnen  
 Praktische hulp - voorbeeld: ondersteuning bij wandelen, het maken van uitstapjes of bezoeken aan bekenden, bezoeken aan de huisarts of het ziekenhuis, het regelen van hulp of het regelen van financiële zaken

12.19.1.1 **If 'Wat voor hulp van familieleden of bekenden heeft u gehad in de afgelopen 3 maanden?' is equal to 'Huishoudelijke hulp - voorbeeld: stofzuigen, bed opmaken, boodschappen doen, klaarmaken van eten en drinken, verzorgen van kinderen' answer this question:**  
Hoeveel weken heeft u deze hulp gehad?  
Huishoudelijke hulp:

weken in de afgelopen 3 maanden

12.19.1.2 **If 'Wat voor hulp van familieleden of bekenden heeft u gehad in de afgelopen 3 maanden?' is equal to 'Verzorging van uzelf - voorbeeld: hulp bij douchen of aankleden, hulp bij het eten en drinken of het geven van medicijnen' answer this question:**  
Hoeveel weken heeft u deze hulp gehad? Verzorging van uzelf:

weken in de afgelopen 3 maanden

12.19.1.3 **If 'Wat voor hulp van familieleden of bekenden heeft u gehad in de afgelopen 3 maanden?' is equal to 'Praktische hulp - voorbeeld: ondersteuning bij wandelen, het maken van uitstapjes of bezoeken aan bekenden, bezoeken aan de huisarts of het ziekenhuis, het regelen van hulp of het regelen van financiële zaken' answer this question:**  
Hoeveel uur hulp kreeg u in deze weken gemiddeld?  
Praktische hulp:

weken in de afgelopen 3 maanden

12.19.1.4 **If 'Wat voor hulp van familieleden of bekenden heeft u gehad in de afgelopen 3 maanden?' is equal to 'Huishoudelijke hulp - voorbeeld: stofzuigen, bed opmaken, boodschappen doen, klaarmaken van eten en drinken, verzorgen van kinderen' answer this question:**  
Hoeveel uur hulp kreeg u in deze weken gemiddeld?  
Huishoudelijke hulp: gemiddeld

uur in de week

12.19.1.5 **If 'Wat voor hulp van familieleden of bekenden heeft u gehad in de afgelopen 3 maanden?' is equal to 'Verzorging van uzelf - voorbeeld: hulp bij douchen of aankleden, hulp bij het eten en drinken of het geven van medicijnen' answer this question:**  
Hoeveel uur hulp kreeg u in deze weken gemiddeld?  
Verzorging van uzelf: gemiddeld

uur in de week

12.19.1.6 **If 'Wat voor hulp van familieleden of bekenden heeft u gehad in de afgelopen 3 maanden?' is equal to 'Praktische hulp - voorbeeld: ondersteuning bij wandelen, het maken van uitstapjes of bezoeken aan bekenden, bezoeken aan de huisarts of het ziekenhuis, het regelen van hulp of het regelen van financiële zaken' answer this question:**  
Hoeveel uur hulp kreeg u in deze weken gemiddeld?  
Praktische hulp: gemiddeld

uur in de week

## Vragenlijst PRIMA studie 52 weken - Dank

| Number | Question                                                                                                                                      | Answers                                                                  |
|--------|-----------------------------------------------------------------------------------------------------------------------------------------------|--------------------------------------------------------------------------|
| 13.1   | Hartelijk dank voor de tijd die u heeft genomen om de vragenlijsten in te vullen. Indien u nog opmerkingen heeft kunt u deze hierin plaatsen. | <div style="border: 1px dashed black; height: 50px; width: 100%;"></div> |

## Survey 'Vragenlijst PRIMA studie 6 weken'

### Vragenlijst PRIMA studie 6 weken - AOFAS - Pijn

| Number | Question                            | Answers                                                                                                                                                                                                         |
|--------|-------------------------------------|-----------------------------------------------------------------------------------------------------------------------------------------------------------------------------------------------------------------|
| 1.1    | Hoeveel pijn ervaart u aan uw voet? | <input type="checkbox"/> Geen<br><input type="checkbox"/> Milde pijnklachten of af en toe pijn<br><input type="checkbox"/> Matige pijnklachten, dagelijks<br><input type="checkbox"/> Vrijwel continu erge pijn |

### Vragenlijst PRIMA studie 6 weken - AOFAS resterende gedeelte

| Number | Question                                              | Answers                                                                                                                                                                                                                                                                                                                                                                                                                                              |
|--------|-------------------------------------------------------|------------------------------------------------------------------------------------------------------------------------------------------------------------------------------------------------------------------------------------------------------------------------------------------------------------------------------------------------------------------------------------------------------------------------------------------------------|
| 2.1    | Hoeveel beperkingen in het dagelijks leven ervaart u? | <input type="radio"/> Geen beperkingen, geen hulpmiddelen nodig<br><input type="radio"/> Geen beperkingen in algemeen dagelijkse bezigheden, wel beperkingen in recreatieve activiteiten (sport, hobbies, etc) geen ondersteuning<br><input type="radio"/> Beperkingen bij dagelijkse- en recreatieve activiteiten, stok<br><input type="radio"/> Ernstige beperkingen bij dagelijkse- en recreatieve activiteiten, walker, krukken, rolstoel, brace |

- 
- 2.2      Wat is de afstand die u in één keer kunt lopen?
- Meer dan 600 meter
  - 400 - 600 meter
  - 100 - 300 meter
  - Minder dan 100 meter
- 
- 2.3      Heeft u moeite met lopen op een bepaalde ondergrond?
- Geen problemen bij lopen
  - Enig problemen op ongelijke ondergrond, trap, helling, ladders
  - Ernstige problemen bij ongelijke ondergrond, trap, helling, ladders
- 
- 2.4      Hoe zou u uw looppatroon beoordelen?
- Normaal of minimaal afwijkend
  - Duidelijk
  - Ernstig
- 
- 2.5      Hoe zou u de beweeglijkheid van uw voet beoordelen ten opzichte van de andere zijde of ten opzichte van vóór het ongeval?
- Hetzelfde of licht beperkt t.o.v. de niet aangedane zijde of zoals voor het ongeval
  - Ongeveer de helft beperkt
  - Sterk verminderd, bijna geen bewegingen mogelijk
- 
- 2.6      Hoe zou u de beweeglijkheid van uw enkel beoordelen ten opzichte van de andere zijde of ten opzichte van voor het ongeval?
- Hetzelfde of licht beperkt t.o.v. de niet aangedane zijde of zoals voor het ongeval
  - Ongeveer de helft beperkt
  - Sterk verminderd, bijna geen bewegingen mogelijk
- 
- 2.7      Hoe zou u de stabiliteit van uw voet en enkel beoordelen
- Stabiel, ik verzwik mijn enkel hooguit incidenteel
  - Niet stabiel, ik verzwik mijn enkel vaak
- 
- 2.8      Hoe zou u de stand van uw voet beoordelen ten opzichte van de andere zijde of ten opzichte van voor het ongeval?
- Goed, ik kan mijn voet goed plat op de grond zetten, waarbij de stand niet afwijkend is
  - Ik sta vrijwel alleen op de buitenzijde van mijn voet
  - Ik kan mijn voet niet plat op de grond zetten en loop vrijwel alleen op mijn voorvoet

## Vragenlijst PRIMA studie 6 weken - VAS Pain score

| Number | Question                                                                                                                                                             | Answers             |
|--------|----------------------------------------------------------------------------------------------------------------------------------------------------------------------|---------------------|
| 3.1    | VAS pijnscore (Geef uw minimaal pijnscore aan tijdens dagelijkse activiteiten op een schaal van 0 tot 100, waarbij 0 geen pijn is en 100 de ergste pijn denkbaar is) | (0.00) 100 (100.00) |

## Vragenlijst PRIMA studie 6 weken - AAS

| Number | Question | Answers |
|--------|----------|---------|
|--------|----------|---------|

- 
- 4.1 Wat is het meest bij u van toepassing ten aanzien van uw activiteit?
- American Football
  - Basketbal
  - Gymnastiek/turnen
  - Handbal
  - Rugby
  - Voetbal
  - Hockey
  - Korfbal
  - Gevechtssporten: judo, karate, kung fu, taekwando, jiu jitsu, etc.
  - Oriëntatielopen
  - Rhythmische gymnastiek
  - Volleybal
  - Boxen
  - Freestyle snowboarden
  - Ijshockey
  - Tennis
  - Worstelen
  - Fitness, aerobics
  - Badminton
  - Baseball
  - Cross-country hardlopen
  - Moderne pentathlon
  - Squash
  - Surfen, windsurfen
  - Tafel tennis
  - Atletiek: spring-, werponderdelen
  - Waterskieën
  - Dans
  - Schermen
  - Zaalhockey
  - Bergbeklimmen
  - Langlauf
  - Parachute springen
  - Softball
  - Speciale beroepen en werkactiviteiten; speciale beroepen: ballet, professioneel soldaat, speciale reddingswerker, stuntman, etc.
  - Duiken
  - Scubaduiken
  - Skaten, in-line skaten
  - Atletiek: looponderdelen
  - Triatlon
  - Gewichtsheffen, body-building
-

- Alle competitieve sporten hieronder met 'seasonal' conditioning
- Zwaar fysiek werk
- Alpine skiën en snowboarden
- Bowlen/curlen
- Golf
- Mountainbike/BMX
- Powerliften
- Zeilen
- Fysiek werk
- Wielrennen
- Paardrijden
- Motorsporten/technische sporten
- Roeien, kayaken
- Boogschieten
- Water polo en zwemmen
- Kunnen lopen op oneven grond
- Geen sport, echter geen limitatie in dagelijkse activiteiten
- Kunnen lopen op even grond, maar de dagelijkse activiteiten zijn gelimiteerd
- Niet kunnen lopen, fysieke handicap wegens enkelproblemen

- 
- |       |                                                                                                                                                                            |                                                                                                                       |
|-------|----------------------------------------------------------------------------------------------------------------------------------------------------------------------------|-----------------------------------------------------------------------------------------------------------------------|
| 4.1.1 | <p><b><i>If 'Wat is het meest bij u van toepassing ten aanzien van uw activiteit?' is equal to 'American Football' answer this question:</i></b><br/>American Football</p> | <p><input type="radio"/> Professioneel<br/><input type="radio"/> Competitief<br/><input type="radio"/> Recreatief</p> |
| <hr/> |                                                                                                                                                                            |                                                                                                                       |
| 4.1.2 | <p><b><i>If 'Wat is het meest bij u van toepassing ten aanzien van uw activiteit?' is equal to 'Basketbal' answer this question:</i></b><br/>Basketbal</p>                 | <p><input type="radio"/> Professioneel<br/><input type="radio"/> Competitief<br/><input type="radio"/> Recreatief</p> |
| <hr/> |                                                                                                                                                                            |                                                                                                                       |
| 4.1.3 | <p><b><i>If 'Wat is het meest bij u van toepassing ten aanzien van uw activiteit?' is equal to 'Gymnastiek/turnen' answer this question:</i></b><br/>Gymnastiek/turnen</p> | <p><input type="radio"/> Professioneel<br/><input type="radio"/> Competitief<br/><input type="radio"/> Recreatief</p> |
| <hr/> |                                                                                                                                                                            |                                                                                                                       |
| 4.1.4 | <p><b><i>If 'Wat is het meest bij u van toepassing ten aanzien van uw activiteit?' is equal to 'Handbal' answer this question:</i></b><br/>Handbal</p>                     | <p><input type="radio"/> Professioneel<br/><input type="radio"/> Competitief<br/><input type="radio"/> Recreatief</p> |
| <hr/> |                                                                                                                                                                            |                                                                                                                       |
| 4.1.5 | <p><b><i>If 'Wat is het meest bij u van toepassing ten aanzien van uw activiteit?' is equal to 'Rugby' answer this question:</i></b><br/>Rugby</p>                         | <p><input type="radio"/> Professioneel<br/><input type="radio"/> Competitief<br/><input type="radio"/> Recreatief</p> |

|        |                                                                                                                                                                                                                                                               |                                                                                                              |
|--------|---------------------------------------------------------------------------------------------------------------------------------------------------------------------------------------------------------------------------------------------------------------|--------------------------------------------------------------------------------------------------------------|
| 4.1.6  | <b>If 'Wat is het meest bij u van toepassing ten aanzien van uw activiteit?' is equal to 'Voetbal' answer this question:</b><br>Voetbal                                                                                                                       | <input type="radio"/> Professioneel<br><input type="radio"/> Competitief<br><input type="radio"/> Recreatief |
| 4.1.7  | <b>If 'Wat is het meest bij u van toepassing ten aanzien van uw activiteit?' is equal to 'Hockey' answer this question:</b><br>Hockey                                                                                                                         | <input type="radio"/> Professioneel<br><input type="radio"/> Competitief<br><input type="radio"/> Recreatief |
| 4.1.8  | <b>If 'Wat is het meest bij u van toepassing ten aanzien van uw activiteit?' is equal to 'Korfbal' answer this question:</b><br>Korfbal                                                                                                                       | <input type="radio"/> Professioneel<br><input type="radio"/> Competitief<br><input type="radio"/> Recreatief |
| 4.1.9  | <b>If 'Wat is het meest bij u van toepassing ten aanzien van uw activiteit?' is equal to 'Gevechtssporten: judo, karate, kung fu, taekwando, jiu jitsu, etc.' answer this question:</b><br>Gevechtssporten: judo, karate, kung fu, taekwando, jiu jitsu, etc. | <input type="radio"/> Professioneel<br><input type="radio"/> Competitief<br><input type="radio"/> Recreatief |
| 4.1.10 | <b>If 'Wat is het meest bij u van toepassing ten aanzien van uw activiteit?' is equal to 'Oriëntatielopen' answer this question:</b><br>Oriëntatielopen                                                                                                       | <input type="radio"/> Professioneel<br><input type="radio"/> Competitief<br><input type="radio"/> Recreatief |
| 4.1.11 | <b>If 'Wat is het meest bij u van toepassing ten aanzien van uw activiteit?' is equal to 'Rhythmische gymnastiek' answer this question:</b><br>Rhythmisch gymnastiek                                                                                          | <input type="radio"/> Professioneel<br><input type="radio"/> Competitief<br><input type="radio"/> Recreatief |
| 4.1.12 | <b>If 'Wat is het meest bij u van toepassing ten aanzien van uw activiteit?' is equal to 'Volleybal' answer this question:</b><br>Volleybal                                                                                                                   | <input type="radio"/> Professioneel<br><input type="radio"/> Competitief<br><input type="radio"/> Recreatief |
| 4.1.13 | <b>If 'Wat is het meest bij u van toepassing ten aanzien van uw activiteit?' is equal to 'Boxen' answer this question:</b><br>Boxen                                                                                                                           | <input type="radio"/> Professioneel<br><input type="radio"/> Competitief<br><input type="radio"/> Recreatief |
| 4.1.14 | <b>If 'Wat is het meest bij u van toepassing ten aanzien van uw activiteit?' is equal to 'Freestyle snowboarden' answer this question:</b><br>Freestyle snowboarden                                                                                           | <input type="radio"/> Professioneel<br><input type="radio"/> Competitief<br><input type="radio"/> Recreatief |
| 4.1.15 | <b>If 'Wat is het meest bij u van toepassing ten aanzien van uw activiteit?' is equal to 'Freestyle snowboarden' answer this question:</b><br>IJs hockey                                                                                                      | <input type="radio"/> Professioneel<br><input type="radio"/> Competitief<br><input type="radio"/> Recreatief |



|        |                                                                                                                                                                         |                                                                                                              |
|--------|-------------------------------------------------------------------------------------------------------------------------------------------------------------------------|--------------------------------------------------------------------------------------------------------------|
| 4.1.16 | <b>If 'Wat is het meest bij u van toepassing ten aanzien van uw acitviteit?' is equal to 'Tennis' answer this question:</b><br>Tennis                                   | <input type="radio"/> Professioneel<br><input type="radio"/> Competitief<br><input type="radio"/> Recreatief |
| 4.1.17 | <b>If 'Wat is het meest bij u van toepassing ten aanzien van uw acitviteit?' is equal to 'Worstelen' answer this question:</b><br>Worstelen                             | <input type="radio"/> Professioneel<br><input type="radio"/> Competitief<br><input type="radio"/> Recreatief |
| 4.1.18 | <b>If 'Wat is het meest bij u van toepassing ten aanzien van uw acitviteit?' is equal to 'Fitness, aerobics' answer this question:</b><br>Fitness, aerobics             | <input type="radio"/> Professioneel<br><input type="radio"/> Competitief<br><input type="radio"/> Recreatief |
| 4.1.19 | <b>If 'Wat is het meest bij u van toepassing ten aanzien van uw acitviteit?' is equal to 'Badminton' answer this question:</b><br>Badminton                             | <input type="radio"/> Professioneel<br><input type="radio"/> Competitief<br><input type="radio"/> Recreatief |
| 4.1.20 | <b>If 'Wat is het meest bij u van toepassing ten aanzien van uw acitviteit?' is equal to 'Baseball' answer this question:</b><br>Baseball                               | <input type="radio"/> Professioneel<br><input type="radio"/> Competitief<br><input type="radio"/> Recreatief |
| 4.1.21 | <b>If 'Wat is het meest bij u van toepassing ten aanzien van uw acitviteit?' is equal to 'Cross-country hardlopen' answer this question:</b><br>Cross-country hardlopen | <input type="radio"/> Professioneel<br><input type="radio"/> Competitief<br><input type="radio"/> Recreatief |
| 4.1.22 | <b>If 'Wat is het meest bij u van toepassing ten aanzien van uw acitviteit?' is equal to 'Moderne pentathlon' answer this question:</b><br>Moderne pentathlon           | <input type="radio"/> Professioneel<br><input type="radio"/> Competitief<br><input type="radio"/> Recreatief |
| 4.1.23 | <b>If 'Wat is het meest bij u van toepassing ten aanzien van uw acitviteit?' is equal to 'Squash' answer this question:</b><br>Squash                                   | <input type="radio"/> Professioneel<br><input type="radio"/> Competitief<br><input type="radio"/> Recreatief |
| 4.1.24 | <b>If 'Wat is het meest bij u van toepassing ten aanzien van uw acitviteit?' is equal to 'Surfen, windsurfen' answer this question:</b><br>Surfen, windsurfen           | <input type="radio"/> Professioneel<br><input type="radio"/> Competitief<br><input type="radio"/> Recreatief |
| 4.1.25 | <b>If 'Wat is het meest bij u van toepassing ten aanzien van uw acitviteit?' is equal to 'Tafel tennis' answer this question:</b><br>Tafel tennis                       | <input type="radio"/> Professioneel<br><input type="radio"/> Competitief<br><input type="radio"/> Recreatief |

|        |                                                                                                                                                                                             |                                                                                                              |
|--------|---------------------------------------------------------------------------------------------------------------------------------------------------------------------------------------------|--------------------------------------------------------------------------------------------------------------|
| 4.1.26 | <b>If 'Wat is het meest bij u van toepassing ten aanzien van uw activiteit?' is equal to 'Atletiek: spring-, werponderdelen' answer this question:</b><br>Atletiek: spring-, werponderdelen | <input type="radio"/> Professioneel<br><input type="radio"/> Competitief<br><input type="radio"/> Recreatief |
| 4.1.27 | <b>If 'Wat is het meest bij u van toepassing ten aanzien van uw activiteit?' is equal to 'Waterskieën' answer this question:</b><br>Waterskien                                              | <input type="radio"/> Professioneel<br><input type="radio"/> Competitief<br><input type="radio"/> Recreatief |
| 4.1.28 | <b>If 'Wat is het meest bij u van toepassing ten aanzien van uw activiteit?' is equal to 'Dans' answer this question:</b><br>Dans                                                           | <input type="radio"/> Professioneel<br><input type="radio"/> Competitief<br><input type="radio"/> Recreatief |
| 4.1.29 | <b>If 'Wat is het meest bij u van toepassing ten aanzien van uw activiteit?' is equal to 'Schermen' answer this question:</b><br>Schermen                                                   | <input type="radio"/> Professioneel<br><input type="radio"/> Competitief<br><input type="radio"/> Recreatief |
| 4.1.30 | <b>If 'Wat is het meest bij u van toepassing ten aanzien van uw activiteit?' is equal to 'Zaalhockey' answer this question:</b><br>Zaalhockey                                               | <input type="radio"/> Professioneel<br><input type="radio"/> Competitief<br><input type="radio"/> Recreatief |
| 4.1.31 | <b>If 'Wat is het meest bij u van toepassing ten aanzien van uw activiteit?' is equal to 'Bergbeklimmen' answer this question:</b><br>Bergbeklimmen                                         | <input type="radio"/> Professioneel<br><input type="radio"/> Competitief<br><input type="radio"/> Recreatief |
| 4.1.32 | <b>If 'Wat is het meest bij u van toepassing ten aanzien van uw activiteit?' is equal to 'Langlauf' answer this question:</b><br>Langlauf                                                   | <input type="radio"/> Professioneel<br><input type="radio"/> Competitief<br><input type="radio"/> Recreatief |
| 4.1.33 | <b>If 'Wat is het meest bij u van toepassing ten aanzien van uw activiteit?' is equal to 'Parachute springen' answer this question:</b><br>Parachute springen                               | <input type="radio"/> Professioneel<br><input type="radio"/> Competitief<br><input type="radio"/> Recreatief |
| 4.1.34 | <b>If 'Wat is het meest bij u van toepassing ten aanzien van uw activiteit?' is equal to 'Softball' answer this question:</b><br>Softball                                                   | <input type="radio"/> Professioneel<br><input type="radio"/> Competitief<br><input type="radio"/> Recreatief |

|        |                                                                                                                                                                                                                                                                                                                                                                                          |                                                                                              |
|--------|------------------------------------------------------------------------------------------------------------------------------------------------------------------------------------------------------------------------------------------------------------------------------------------------------------------------------------------------------------------------------------------|----------------------------------------------------------------------------------------------|
| 4.1.35 | <b>If 'Wat is het meest bij u van toepassing ten aanzien van uw activiteit?' is equal to 'Speciale beroepen en werkactiviteiten; speciale beroepen: ballet, professioneel soldaat, speciale reddingswerker, stuntman, etc.' answer this question:</b><br>Speciale beroepen en werkactiviteiten speciale beroepen: ballet, professioneel soldaat, speciale reddingswerker, stuntman, etc. | <input type="radio"/> ballet, professioneel soldaat, speciale reddingswerker, stuntman, etc. |
| 4.1.36 | <b>If 'Wat is het meest bij u van toepassing ten aanzien van uw activiteit?' is equal to 'Duiken' answer this question:</b><br>Duiken                                                                                                                                                                                                                                                    | <input type="radio"/> Professioneel/competitief<br><input type="radio"/> Recreatief          |
| 4.1.37 | <b>If 'Wat is het meest bij u van toepassing ten aanzien van uw activiteit?' is equal to 'Scubaduiken' answer this question:</b><br>Scubaduiken                                                                                                                                                                                                                                          | <input type="radio"/> Professioneel/competitief<br><input type="radio"/> Recreatief          |
| 4.1.38 | <b>If 'Wat is het meest bij u van toepassing ten aanzien van uw activiteit?' is equal to 'Skaten, in-line skaten' answer this question:</b><br>skaten, in-linen skaten                                                                                                                                                                                                                   | <input type="radio"/> Professioneel/competitief<br><input type="radio"/> Recreatief          |
| 4.1.39 | <b>If 'Wat is het meest bij u van toepassing ten aanzien van uw activiteit?' is equal to 'Atletiek: looponderdelen' answer this question:</b><br>Atletiek: looponderdelen                                                                                                                                                                                                                | <input type="radio"/> Professioneel/competitief<br><input type="radio"/> Recreatief          |
| 4.1.40 | <b>If 'Wat is het meest bij u van toepassing ten aanzien van uw activiteit?' is equal to 'Triatlon' answer this question:</b><br>triatlon                                                                                                                                                                                                                                                | <input type="radio"/> Professioneel/competitief<br><input type="radio"/> Recreatief          |
| 4.1.41 | <b>If 'Wat is het meest bij u van toepassing ten aanzien van uw activiteit?' is equal to 'Gewichtsheffen, body-building' answer this question:</b><br>Gewichtsheffen, body-building                                                                                                                                                                                                      | <input type="radio"/> Professioneel/competitief<br><input type="radio"/> Recreatief          |
| 4.1.42 | <b>If 'Wat is het meest bij u van toepassing ten aanzien van uw activiteit?' is equal to 'Alle competitieve sporten hieronder met 'seasonal' conditioning' answer this question:</b><br>Alle competitieve sporten hieronder met 'seasonal' conditioning                                                                                                                                  | <input type="radio"/> Alle competitieve sporten hieronder met 'seasonal' conditioning        |
| 4.1.43 | <b>If 'Wat is het meest bij u van toepassing ten aanzien van uw activiteit?' is equal to 'Zwaar fysiek werk' answer this question:</b><br>Zwaar fysiek werk                                                                                                                                                                                                                              | <input type="radio"/> Alle competitieve sporten hieronder met 'seasonal' conditioning        |

|        |                                                                                                                                                                                          |                                                       |
|--------|------------------------------------------------------------------------------------------------------------------------------------------------------------------------------------------|-------------------------------------------------------|
| 4.1.44 | <b>If 'Wat is het meest bij u van toepassing ten aanzien van uw acitiviteit?' is equal to 'Alpine skiën en snowboarden' answer this question:</b><br>Alpine skien en snowboarden         | <input type="radio"/> Alpine skien en snowboarden     |
| 4.1.45 | <b>If 'Wat is het meest bij u van toepassing ten aanzien van uw acitiviteit?' is equal to 'Bowlen/curlen' answer this question:</b><br>Bowlen/curlen                                     | <input type="radio"/> Bowlen/curlen                   |
| 4.1.46 | <b>If 'Wat is het meest bij u van toepassing ten aanzien van uw acitiviteit?' is equal to 'Golf' answer this question:</b><br>Golf                                                       | <input type="radio"/> Golf                            |
| 4.1.47 | <b>If 'Wat is het meest bij u van toepassing ten aanzien van uw acitiviteit?' is equal to 'Mountainbike/BMX' answer this question:</b><br>Mountainbike/BMX                               | <input type="radio"/> Mountainbike/BMX                |
| 4.1.48 | <b>If 'Wat is het meest bij u van toepassing ten aanzien van uw acitiviteit?' is equal to 'Powerliften' answer this question:</b><br>Powerliften                                         | <input type="radio"/> Powerliften                     |
| 4.1.49 | <b>If 'Wat is het meest bij u van toepassing ten aanzien van uw acitiviteit?' is equal to 'Zeilen' answer this question:</b><br>Zeilen                                                   | <input type="radio"/> Zeilen                          |
| 4.1.50 | <b>If 'Wat is het meest bij u van toepassing ten aanzien van uw acitiviteit?' is equal to 'Fysiek werk' answer this question:</b><br>Fysiek werk                                         | <input type="radio"/> Fysiek werk                     |
| 4.1.51 | <b>If 'Wat is het meest bij u van toepassing ten aanzien van uw acitiviteit?' is equal to 'Wielrennen' answer this question:</b><br>Wielrennen                                           | <input type="radio"/> Wielrennen                      |
| 4.1.52 | <b>If 'Wat is het meest bij u van toepassing ten aanzien van uw acitiviteit?' is equal to 'Paardrijden' answer this question:</b><br>Paardrijden                                         | <input type="radio"/> Paardrijden                     |
| 4.1.53 | <b>If 'Wat is het meest bij u van toepassing ten aanzien van uw acitiviteit?' is equal to 'Motorsporten/technische sporten' answer this question:</b><br>Motorsporten/technische sporten | <input type="radio"/> Motorsporten/technische sporten |
| 4.1.54 | <b>If 'Wat is het meest bij u van toepassing ten aanzien van uw acitiviteit?' is equal to 'Roeien, kayakken' answer this question:</b><br>Roeien, kayakken                               | <input type="radio"/> Roeien, kayakken                |

|        |                                                                                                                                                                                                                                                                                   |                                                                                                    |
|--------|-----------------------------------------------------------------------------------------------------------------------------------------------------------------------------------------------------------------------------------------------------------------------------------|----------------------------------------------------------------------------------------------------|
| 4.1.55 | <b>If 'Wat is het meest bij u van toepassing ten aanzien van uw activiteit?' is equal to 'Boogschieten' answer this question:</b><br>Boogschieten                                                                                                                                 | <input type="radio"/> Boogschieten                                                                 |
| 4.1.56 | <b>If 'Wat is het meest bij u van toepassing ten aanzien van uw activiteit?' is equal to 'Water polo en zwemmen' answer this question:</b><br>Water polo en zwemmen                                                                                                               | <input type="radio"/> Water polo en zwemmen                                                        |
| 4.1.57 | <b>If 'Wat is het meest bij u van toepassing ten aanzien van uw activiteit?' is equal to 'Kunnen lopen op oneven grond' answer this question:</b><br>Kunnen lopen op oneven grond                                                                                                 | <input type="radio"/> Kunnen lopen op oneven grond                                                 |
| 4.1.58 | <b>If 'Wat is het meest bij u van toepassing ten aanzien van uw activiteit?' is equal to 'Geen sport, echter geen limitatie in dagelijkse activiteiten' answer this question:</b><br>Geen sport, echter geen limitatie in dagelijkse activiteiten                                 | <input type="radio"/> Geen sport, echter geen limitatie in dagelijkse activiteiten                 |
| 4.1.59 | <b>If 'Wat is het meest bij u van toepassing ten aanzien van uw activiteit?' is equal to 'Kunnen lopen op even grond, maar de dagelijkse activiteiten zijn gelimiteerd' answer this question:</b><br>Kunnen lopen op even grond, maar de dagelijkse activiteiten zijn gelimiteerd | <input type="radio"/> Kunnen lopen op even grond, maar de dagelijkse activiteiten zijn gelimiteerd |
| 4.1.60 | <b>If 'Wat is het meest bij u van toepassing ten aanzien van uw activiteit?' is equal to 'Niet kunnen lopen, fysieke handicap wegens enkelproblemen' answer this question:</b><br>Niet kunnen lopen, fysieke handicap wegens enkelproblemen                                       | <input type="radio"/> Niet kunnen lopen, fysieke handicap wegens enkelproblemen                    |

## Vragenlijst PRIMA studie 6 weken - Hoe tevreden bent u over de enkelklachten?

| Number | Question                                   | Answers                                                                                                                       |
|--------|--------------------------------------------|-------------------------------------------------------------------------------------------------------------------------------|
| 5.1    | Hoe tevreden bent u over de enkelklachten? | <input type="radio"/> Slecht<br><input type="radio"/> Matig<br><input type="radio"/> Goed<br><input type="radio"/> Uitstekend |

## Vragenlijst PRIMA studie 6 weken - SF-36

| Number | Question                                                                                                                                                                                                                                                                                                                                                           | Answers                                                                                                                                                                                                                                                                                                                                                                 |
|--------|--------------------------------------------------------------------------------------------------------------------------------------------------------------------------------------------------------------------------------------------------------------------------------------------------------------------------------------------------------------------|-------------------------------------------------------------------------------------------------------------------------------------------------------------------------------------------------------------------------------------------------------------------------------------------------------------------------------------------------------------------------|
|        | Deze vragenlijst gaat over uw standpunten t.a.v. uw gezondheid. Met behulp van deze gegevens kan worden bijgehouden hoe u zich voelt en hoe goed u in staat bent uw gebruikelijke bezigheden uit te voeren. Beantwoord elke vraag door een antwoord aan te klikken. Als u niet zeker weet hoe u een vraag moet beantwoorden, geef dan het best mogelijke antwoord. |                                                                                                                                                                                                                                                                                                                                                                         |
| 6.1    | Hoe zou u over het algemeen uw gezondheid noemen?                                                                                                                                                                                                                                                                                                                  | <input type="radio"/> Uitstekend <input type="radio"/> Zeer goed <input type="radio"/><br><input type="radio"/> Goed <input type="radio"/> Matig <input type="radio"/> Slecht                                                                                                                                                                                           |
| 6.2    | Hoe beoordeelt u nu uw gezondheid over het algemeen vergeleken met een jaar geleden?                                                                                                                                                                                                                                                                               | <input type="radio"/> Veel beter dan een jaar geleden <input type="radio"/><br><input type="radio"/> Wat beter dan een jaar geleden <input type="radio"/><br><input type="radio"/> Ongeveer hetzelfde als een jaar geleden<br><input type="radio"/> Wat slechter dan een jaar geleden <input type="radio"/><br><input type="radio"/> Veel slechter dan een jaar geleden |
| 6.3    | Wordt u door uw gezondheid op dit moment beperkt bij forse inspanning, zoals hardlopen, tillen van zware voorwerpen of een veeleisende sport beoefenen?                                                                                                                                                                                                            | <input type="radio"/> Ja, ernstig beperkt <input type="radio"/> Ja, een beetje beperkt <input type="radio"/> Nee, helemaal niet beperkt                                                                                                                                                                                                                                 |
| 6.4    | Wordt u door uw gezondheid op dit moment beperkt bij matige inspanning zoals een tafel verplaatsen, stofzuigen, zwemmen of fietsen?                                                                                                                                                                                                                                | <input type="radio"/> Ja, ernstig beperkt <input type="radio"/> Ja, een beetje beperkt <input type="radio"/> Nee, helemaal niet beperkt                                                                                                                                                                                                                                 |
| 6.5    | Wordt u door uw gezondheid op dit moment beperkt bij boodschappen tillen of dragen?                                                                                                                                                                                                                                                                                | <input type="radio"/> Ja, ernstig beperkt <input type="radio"/> Ja, een beetje beperkt <input type="radio"/> Nee, helemaal niet beperkt                                                                                                                                                                                                                                 |
| 6.6    | Wordt u door uw gezondheid op dit moment beperkt bij een paar trappen oplopen?                                                                                                                                                                                                                                                                                     | <input type="radio"/> Ja, ernstig beperkt <input type="radio"/> Ja, een beetje beperkt <input type="radio"/> Nee, helemaal niet beperkt                                                                                                                                                                                                                                 |
| 6.7    | Wordt u door uw gezondheid op dit moment beperkt bij één trap oplopen?                                                                                                                                                                                                                                                                                             | <input type="radio"/> Ja, ernstig beperkt <input type="radio"/> Ja, een beetje beperkt <input type="radio"/> Nee, helemaal niet beperkt                                                                                                                                                                                                                                 |
| 6.8    | Wordt u door uw gezondheid op dit moment beperkt bij bukken, knielen of hurken?                                                                                                                                                                                                                                                                                    | <input type="radio"/> Ja, ernstig beperkt <input type="radio"/> Ja, een beetje beperkt <input type="radio"/> Nee, helemaal niet beperkt                                                                                                                                                                                                                                 |
| 6.9    | Wordt u door uw gezondheid op dit moment beperkt bij meer dan één kilometer lopen?                                                                                                                                                                                                                                                                                 | <input type="radio"/> Ja, ernstig beperkt <input type="radio"/> Ja, een beetje beperkt <input type="radio"/> Nee, helemaal niet beperkt                                                                                                                                                                                                                                 |
| 6.10   | Wordt u door uw gezondheid op dit moment beperkt bij een paar honderd meter lopen?                                                                                                                                                                                                                                                                                 | <input type="radio"/> Ja, ernstig beperkt <input type="radio"/> Ja, een beetje beperkt <input type="radio"/> Nee, helemaal niet beperkt                                                                                                                                                                                                                                 |

- 6.11 Wordt u door uw gezondheid op dit moment beperkt bij ongeveer honderd meter lopen?  Ja, ernstig beperkt  Ja, een beetje beperkt  Nee, helemaal niet beperkt
- 
- 6.12 Wordt u door uw gezondheid op dit moment beperkt bij uzelf wassen of aankleden?  Ja, ernstig beperkt  Ja, een beetje beperkt  Nee, helemaal niet beperkt
- 
- 6.13 U besteedde in de afgelopen 4 weken minder tijd aan werk of andere bezigheden  Ja  Nee
- 
- 6.14 U heeft in de afgelopen 4 weken minder bereikt dan u zou willen  Ja  Nee
- 
- 6.15 U was in de afgelopen 4 weken beperkt in het soort werk of andere bezigheden.  Ja  Nee
- 
- 6.16 U had de afgelopen 4 weken moeite om uw werk of andere bezigheden uit te voeren (het kostte u bijvoorbeeld extra inspanning).  Ja  Nee
- 
- 6.17 U besteedde in de afgelopen 4 weken minder tijd aan werk of andere bezigheden ten gevolge van emotionele problemen  Ja  Nee
- 
- 6.18 U heeft in de afgelopen 4 weken minder bereikt dan u zou willen ten gevolge van emotionele problemen.  Ja  Nee
- 
- 6.19 U deed de afgelopen 4 weken uw werk of andere bezigheden niet zo zorgvuldig als gewoonlijk ten gevolge van emotionele problemen.  Ja  Nee
- 
- 6.20 In hoeverre hebben uw lichamelijke gezondheid of emotionele problemen u gedurende de afgelopen 4 weken gehinderd in uw normale omgang met familie, vrienden of burens, of bij activiteiten in groepsverband?  Helemaal niet  Enigszins  Nogal  Veel  Heel erg veel
- 
- 6.21 Hoeveel lichamelijke pijn heeft u de afgelopen 4 weken gehad?  Geen  Heel licht  Licht  Nogal  Ernstig  Heel ernstig
- 
- 6.22 In welke mate bent u de afgelopen 4 weken door de pijn gehinderd in uw normale werk (zowel werk buitenshuis als huishoudelijk werk)?  Helemaal niet  Een klein beetje  Nogal  Veel  Heel erg veel

---

6.23      Voelde u zich levenslustig?

Altijd  
 Meestal  
 Vaak  
 Soms  
 Zelden  
 Nooit

---

6.24      Was u erg zenuwachtig?

Altijd  
 Meestal  
 Vaak  
 Soms  
 Zelden  
 Nooit

---

6.25      Zat u zo in de put dat u niets kon?

Altijd  
 Meestal  
 Vaak  
 Soms  
 Zelden  
 Nooit

---

6.26      Voelde u zich rustig en tevreden?

Altijd  
 Meestal  
 Vaak  
 Soms  
 Zelden  
 Nooit

---

6.27      Had u veel energie?

Altijd  
 Meestal  
 Vaak  
 Soms  
 Zelden  
 Nooit

---

6.28      Voelde u zich somber en neerslachtig?

Altijd  
 Meestal  
 Vaak  
 Soms  
 Zelden  
 Nooit



- 
- 6.29      Voelde u zich uitgeput?
- Altijd  
 Meestal  
 Vaak  
 Soms  
 Zelden  
 Nooit
- 
- 6.30      Was u een gelukkig mens?
- Altijd  
 Meestal  
 Vaak  
 Soms  
 Zelden  
 Nooit
- 
- 6.31      Voelde u zich moe?
- Altijd  
 Meestal  
 Vaak  
 Soms  
 Zelden  
 Nooit
- 
- 6.32      Hoe vaak hebben uw lichamelijke gezondheid of emotionele problemen u gedurende de afgelopen 4 weken gehinderd bij uw sociale activiteiten (zoals vrienden of familie bezoeken etc.)?
- Altijd  
 Meestal  
 Soms  
 Zelden  
 Nooit
- 
- 6.33      Ik lijk wat gemakkelijker ziek te worden dan andere mensen
- Volkomen juist  
 Grotendeels juist  
 Weet ik niet  
 Grotendeels onjuist  
 Volkomen onjuist
- 
- 6.34      Ik ben even gezond als andere mensen die ik ken
- Volkomen juist  
 Grotendeels juist  
 Weet ik niet  
 Grotendeels onjuist  
 Volkomen onjuist

- |      |                                                    |                                                                                                                                                                                                              |
|------|----------------------------------------------------|--------------------------------------------------------------------------------------------------------------------------------------------------------------------------------------------------------------|
| 6.35 | Ik verwacht dat mijn gezondheid achteruit zal gaan | <input type="radio"/> Volkomen juist<br><input type="radio"/> Grotendeels juist<br><input type="radio"/> Weet ik niet<br><input type="radio"/> Grotendeels onjuist<br><input type="radio"/> Volkomen onjuist |
| 6.36 | Mijn gezondheid is uitstekend                      | <input type="radio"/> Volkomen juist<br><input type="radio"/> Grotendeels juist<br><input type="radio"/> Weet ik niet<br><input type="radio"/> Grotendeels onjuist<br><input type="radio"/> Volkomen onjuist |

## Vragenlijst PRIMA studie 6 weken - GAS

| Number | Question                                                                                                                                                                                  | Answers                                                                                                                                                                                                                                                                              |
|--------|-------------------------------------------------------------------------------------------------------------------------------------------------------------------------------------------|--------------------------------------------------------------------------------------------------------------------------------------------------------------------------------------------------------------------------------------------------------------------------------------|
|        | Tijdens de eerste afspraak werd een duidelijk doel met u afgesproken. Dit werd tevens per email naar u gestuurd. Hoe is de situatie nu ten aanzien van de destijds gestelde doelstelling? |                                                                                                                                                                                                                                                                                      |
| 7.1    | Wat is nu de situatie ten aanzien van het tijdens de eerste afspraak afgesproken doelstelling (Goal attainment Scaling)?                                                                  | <input type="radio"/> Achteruitgang (minder dan de uitgangssituatie)<br><input type="radio"/> Uitgangssituatie<br><input type="radio"/> Minder dan het doel<br><input type="radio"/> Doel<br><input type="radio"/> Meer dan het doel<br><input type="radio"/> Veel meer dan het doel |

## Vragenlijst PRIMA studie 6 weken - EQ-5D-3L

| Number | Question                                                                                                                                                                                                                                                                                                                                                           | Answers                                                                                                                                                    |
|--------|--------------------------------------------------------------------------------------------------------------------------------------------------------------------------------------------------------------------------------------------------------------------------------------------------------------------------------------------------------------------|------------------------------------------------------------------------------------------------------------------------------------------------------------|
|        | Deze vragenlijst gaat over uw standpunten t.a.v. uw gezondheid. Met behulp van deze gegevens kan worden bijgehouden hoe u zich voelt en hoe goed u in staat bent uw gebruikelijke bezigheden uit te voeren. Beantwoord elke vraag door een antwoord aan te klikken. Als u niet zeker weet hoe u een vraag moet beantwoorden, geef dan het best mogelijke antwoord. |                                                                                                                                                            |
| 8.1    | Hoe is het met uw Mobiliteit gesteld?                                                                                                                                                                                                                                                                                                                              | <input type="radio"/> Ik heb geen problemen met lopen<br><input type="radio"/> Ik heb enige problemen met lopen<br><input type="radio"/> Ik ben bedlegerig |

|                                                                                                                                                                                                                                            |                                                                                                                  |                                                                                                                                                                                                                                                             |
|--------------------------------------------------------------------------------------------------------------------------------------------------------------------------------------------------------------------------------------------|------------------------------------------------------------------------------------------------------------------|-------------------------------------------------------------------------------------------------------------------------------------------------------------------------------------------------------------------------------------------------------------|
| 8.2                                                                                                                                                                                                                                        | Hoe is het met uw Zelfzorg gesteld?                                                                              | <input type="radio"/> Ik heb geen problemen om mijzelf te wassen of aan te kleden<br><input type="radio"/> Ik heb enige problemen om mijzelf te wassen of aan te kleden<br><input type="radio"/> Ik ben niet in staat om mijzelf te wassen of aan te kleden |
| 8.3                                                                                                                                                                                                                                        | Hoe is het met de Dagelijkse activiteiten (werk, studie, huishouden, gezins- en vrijetijdsactiviteiten) gesteld? | <input type="radio"/> Ik heb geen problemen met mijn dagelijkse activiteiten<br><input type="radio"/> Ik heb enige problemen met mijn dagelijkse activiteiten<br><input type="radio"/> Ik ben niet in staat om mijn dagelijkse activiteiten uit te voeren   |
| 8.4                                                                                                                                                                                                                                        | Hoe is het met de Pijn/klachten gesteld?                                                                         | <input type="radio"/> Ik heb geen pijn of andere klachten<br><input type="radio"/> Ik heb matige pijn of andere klachten<br><input type="radio"/> Ik heb zeer ernstige pijn of andere klachten                                                              |
| 8.5                                                                                                                                                                                                                                        | Hoe is het met de Stemming gesteld?                                                                              | <input type="radio"/> Ik ben niet angstig of somber<br><input type="radio"/> Ik ben matig angstig of somber<br><input type="radio"/> Ik ben erg angstig of somber                                                                                           |
| <p>We willen weten hoe goed of slecht uw gezondheid VANDAAG is. Deze meetschaal loopt van 0 tot 100: 100 staat voor de BESTE gezondheid die u zich kunt voorstellen - 0 staat voor de SLECHTSTE gezondheid die u zich kunt voorstellen</p> |                                                                                                                  |                                                                                                                                                                                                                                                             |
| 8.6                                                                                                                                                                                                                                        | Uw Gezondheid vandaag                                                                                            | (0.00) (100.00)                                                                                                                                                                                                                                             |

## Vragenlijst PRIMA studie 6 weken - AOS

| Number                                                                                                                                                                                                                                                                                                                                                                                                               | Question                                                   | Answers                                                                                            |
|----------------------------------------------------------------------------------------------------------------------------------------------------------------------------------------------------------------------------------------------------------------------------------------------------------------------------------------------------------------------------------------------------------------------|------------------------------------------------------------|----------------------------------------------------------------------------------------------------|
| <p>Instructies: De lijn naast elke vraag staat voor hoeveel PIJN u heeft in verschillende situaties. De linker kant (0) is "geen pijn" en de rechter kant (100) is "ergste pijn denkbaar". Geef voor de onderstaande situaties op de lijn aan hoeveel PIJN u in de afgelopen week in de enkel had. Als een of meerdere van deze situaties niet van toepassing waren, dan kiest u de "niet van toepassing" optie.</p> |                                                            |                                                                                                    |
| 9.1                                                                                                                                                                                                                                                                                                                                                                                                                  | Wat was de hoogte van de ergste pijn in de afgelopen week? | (0.00) (100.00)                                                                                    |
| 9.2                                                                                                                                                                                                                                                                                                                                                                                                                  | Heeft u pijn als u 's ochtends opstaat?                    | <input type="radio"/> Ja<br><input type="radio"/> Nee<br><input type="radio"/> Niet van toepassing |

|       |                                                                                                                                                                                          |                                                                                                    |          |
|-------|------------------------------------------------------------------------------------------------------------------------------------------------------------------------------------------|----------------------------------------------------------------------------------------------------|----------|
| 9.2.1 | <b><i>If 'Heeft u pijn als u 's ochtends opstaat?' is equal to 'Ja' answer this question:</i></b><br>Hoeveel pijn heeft u voordat u 's ochtends opstaat?                                 | (0.00)                                                                                             | (100.00) |
| 9.3   | Heeft u pijn wanneer u op blote voeten loopt?                                                                                                                                            | <input type="radio"/> Ja<br><input type="radio"/> Nee<br><input type="radio"/> Niet van toepassing |          |
| 9.3.1 | <b><i>If 'Heeft u pijn wanneer u op blote voeten loopt?' is equal to 'Ja' answer this question:</i></b><br>Hoeveel pijn heeft u als u op blote voeten loopt?                             | (0.00)                                                                                             | (100.00) |
| 9.4   | Heeft u pijn wanneer u op blote voeten staat?                                                                                                                                            | <input type="radio"/> Ja<br><input type="radio"/> Nee<br><input type="radio"/> Niet van toepassing |          |
| 9.4.1 | <b><i>If 'Heeft u pijn wanneer u op blote voeten staat?' is equal to 'Ja' answer this question:</i></b><br>Hoeveel pijn heeft u als u op blote voeten staat?                             | (0.00)                                                                                             | (100.00) |
| 9.5   | Heeft u pijn wanneer u met schoenen loopt?                                                                                                                                               | <input type="radio"/> Ja<br><input type="radio"/> Nee<br><input type="radio"/> Niet van toepassing |          |
| 9.5.1 | <b><i>If 'Heeft u pijn wanneer u met schoenen loopt?' is equal to 'Ja' answer this question:</i></b><br>Hoeveel pijn heeft u wanneer u met schoenen loopt?                               | (0.00)                                                                                             | (100.00) |
| 9.6   | Heeft u pijn wanneer u met schoenen staat?                                                                                                                                               | <input type="radio"/> Ja<br><input type="radio"/> Nee<br><input type="radio"/> Niet van toepassing |          |
| 9.6.1 | <b><i>If 'Heeft u pijn wanneer u met schoenen staat?' is equal to 'Ja' answer this question:</i></b><br>Hoeveel pijn heeft u wanneer u met schoenen staat?                               | (0.00)                                                                                             | (100.00) |
| 9.7   | Heeft u pijn wanneer u loopt met steunzolen of een brace?                                                                                                                                | <input type="radio"/> Ja<br><input type="radio"/> Nee<br><input type="radio"/> Niet van toepassing |          |
| 9.7.1 | <b><i>If 'Heeft u pijn wanneer u loopt met steunzolen of een brace?' is equal to 'Ja' answer this question:</i></b><br>Hoeveel pijn heeft u wanneer u loopt met steunzolen of een brace? | (0.00)                                                                                             | (100.00) |

|                                                                                                                                                                                                                                                                                                                                                                                                                                                      |                                                                                                                                                                                   |                                                                                                    |
|------------------------------------------------------------------------------------------------------------------------------------------------------------------------------------------------------------------------------------------------------------------------------------------------------------------------------------------------------------------------------------------------------------------------------------------------------|-----------------------------------------------------------------------------------------------------------------------------------------------------------------------------------|----------------------------------------------------------------------------------------------------|
| 9.8                                                                                                                                                                                                                                                                                                                                                                                                                                                  | Heeft u pijn wanneer u staat met steunzolen of een brace?                                                                                                                         | <input type="radio"/> Ja<br><input type="radio"/> Nee<br><input type="radio"/> Niet van toepassing |
| 9.8.1                                                                                                                                                                                                                                                                                                                                                                                                                                                | <b>If 'Heeft u pijn wanneer u staat met steunzolen of een brace?' is equal to 'Ja' answer this question:</b><br>Hoeveel pijn heeft u wanneer u staat met steunzolen of een brace? | (0.00) (100.00)                                                                                    |
| 9.9                                                                                                                                                                                                                                                                                                                                                                                                                                                  | Heeft u pijn aan het einde van de dag?                                                                                                                                            | <input type="radio"/> Ja<br><input type="radio"/> Nee<br><input type="radio"/> Niet van toepassing |
| 9.9.1                                                                                                                                                                                                                                                                                                                                                                                                                                                | <b>If 'Heeft u pijn aan het einde van de dag?' is equal to 'Ja' answer this question:</b><br>Hoeveel pijn heeft u aan het einde van de dag?                                       | (0.00) (100.00)                                                                                    |
| <p>Instructies:De lijn naast elke vraag staat voor hoeveel MOEITE u heeft met verschillende activiteiten. De linker kant (0) is "Niet moeilijk" en de rechter kant (100) is "Te moeilijk, niet uitvoerbaar". Geef voor de onderstaande activiteiten op de lijn aan hoeveel MOEITE u in de afgelopen week door enkelklachten had met onderstaande activiteiten. Als een situatie niet van toepassing is, kies dan de optie "niet van toepassing".</p> |                                                                                                                                                                                   |                                                                                                    |
| 9.10                                                                                                                                                                                                                                                                                                                                                                                                                                                 | Heeft u moeite met door het huis lopen?                                                                                                                                           | <input type="radio"/> Ja<br><input type="radio"/> Nee<br><input type="radio"/> Niet van toepassing |
| 9.10.1                                                                                                                                                                                                                                                                                                                                                                                                                                               | <b>If 'Heeft u moeite met door het huis lopen?' is equal to 'Ja' answer this question:</b><br>Hoeveel moeite heeft u met door het huis lopen?                                     | (0.00) (100.00)                                                                                    |
| 9.11                                                                                                                                                                                                                                                                                                                                                                                                                                                 | Heeft u moeite met buiten lopen op oneven ondergrond?                                                                                                                             | <input type="radio"/> Ja<br><input type="radio"/> Nee<br><input type="radio"/> Niet van toepassing |
| 9.11.1                                                                                                                                                                                                                                                                                                                                                                                                                                               | <b>If 'Heeft u moeite met buiten lopen op oneven ondergrond?' is equal to 'Ja' answer this question:</b><br>Hoeveel moeite heeft u met buiten lopen op oneven ondergrond?         | (0.00) (100.00)                                                                                    |
| 9.12                                                                                                                                                                                                                                                                                                                                                                                                                                                 | Heeft u moeite met een paar honderd meter lopen?                                                                                                                                  | <input type="radio"/> Ja<br><input type="radio"/> Nee<br><input type="radio"/> Niet van toepassing |
| 9.12.1                                                                                                                                                                                                                                                                                                                                                                                                                                               | <b>If 'Heeft u moeite met een paar honderd meter lopen?' is equal to 'Ja' answer this question:</b><br>Hoeveel moeite heeft u met een paar honderd meter lopen?                   | (0.00) (100.00)                                                                                    |

|        |                                                                                                                                                                                 |                                                                                                    |        |          |
|--------|---------------------------------------------------------------------------------------------------------------------------------------------------------------------------------|----------------------------------------------------------------------------------------------------|--------|----------|
| 9.13   | Heeft u moeite met een trap oplopen?                                                                                                                                            | <input type="radio"/> Ja<br><input type="radio"/> Nee<br><input type="radio"/> Niet van toepassing |        |          |
| 9.13.1 | <b>If 'Heeft u moeite met een trap oplopen?' is equal to 'Ja' answer this question:</b><br>Hoeveel moeite heeft u met een trap oplopen?                                         |                                                                                                    | (0.00) | (100.00) |
| 9.14   | Heeft u moeite met een trap aflopen?                                                                                                                                            | <input type="radio"/> Ja<br><input type="radio"/> Nee<br><input type="radio"/> Niet van toepassing |        |          |
| 9.14.1 | <b>If 'Heeft u moeite met een trap aflopen?' is equal to 'Ja' answer this question:</b><br>Hoeveel moeite heeft u met een trap aflopen?                                         |                                                                                                    | (0.00) | (100.00) |
| 9.15   | Heeft u moeite met op de tenen staan?                                                                                                                                           | <input type="radio"/> Ja<br><input type="radio"/> Nee<br><input type="radio"/> Niet van toepassing |        |          |
| 9.15.1 | <b>If 'Heeft u moeite met op de tenen staan?' is equal to 'Ja' answer this question:</b><br>Hoeveel moeite heeft u met op de tenen staan?                                       |                                                                                                    | (0.00) | (100.00) |
| 9.16   | Heeft u moeite met opstaan uit de stoel?                                                                                                                                        | <input type="radio"/> Ja<br><input type="radio"/> Nee<br><input type="radio"/> Niet van toepassing |        |          |
| 9.16.1 | <b>If 'Heeft u moeite met opstaan uit de stoel?' is equal to 'Ja' answer this question:</b><br>Hoeveel moeite heeft u met opstaan uit de stoel?                                 |                                                                                                    | (0.00) | (100.00) |
| 9.17   | Heeft u moeite met het op- of afstappen van stoepranden?                                                                                                                        | <input type="radio"/> Ja<br><input type="radio"/> Nee<br><input type="radio"/> Niet van toepassing |        |          |
| 9.17.1 | <b>If 'Heeft u moeite met het op- of afstappen van stoepranden?' is equal to 'Ja' answer this question:</b><br>Hoeveel moeite heeft u met het op- of afstappen van stoepranden? |                                                                                                    | (0.00) | (100.00) |
| 9.18   | Heeft u moeite met snel lopen of rennen?                                                                                                                                        | <input type="radio"/> Ja<br><input type="radio"/> Nee<br><input type="radio"/> Niet van toepassing |        |          |

9.18.1 **If 'Heeft u moeite met snel lopen of rennen?' is equal to 'Ja' answer this question:** (0.00) (100.00)  
Hoeveel moeite heeft u met snel lopen of rennen?

## Vragenlijst PRIMA studie 6 weken - FAOS

| Number                                                                                                                                                                                                                                                                                                                                                                                                                                                                                                                                                                                     | Question                                                                                             | Answers                                                                                                                                                    |
|--------------------------------------------------------------------------------------------------------------------------------------------------------------------------------------------------------------------------------------------------------------------------------------------------------------------------------------------------------------------------------------------------------------------------------------------------------------------------------------------------------------------------------------------------------------------------------------------|------------------------------------------------------------------------------------------------------|------------------------------------------------------------------------------------------------------------------------------------------------------------|
| <p>Deze lijst vraagt naar uw mening over uw voet/enkel. Uw antwoorden geven ons een beeld van uw voet/enkel klachten en hoe u in staat bent om alledaagse activiteiten uit te voeren in uw huidige situatie. Beantwoorden van een vraag doet u door het aanklikken van een vakje met het volgens u meest juiste antwoord (één vakje per vraag). Als u niet zeker weet hoe u een vraag moet beantwoorden, geeft u dan het antwoord dat volgens u het meest op uw situatie van toepassing is. Deze vraag heeft betrekking op het voorkomen van voet/enkel klachten in de afgelopen week.</p> |                                                                                                      |                                                                                                                                                            |
| 10.1                                                                                                                                                                                                                                                                                                                                                                                                                                                                                                                                                                                       | Is uw voet/enkel gezwollen?                                                                          | <input type="radio"/> Nooit <input type="radio"/> Zelden <input type="radio"/> Soms <input type="radio"/> Vaak <input type="radio"/> Altijd                |
| 10.2                                                                                                                                                                                                                                                                                                                                                                                                                                                                                                                                                                                       | Voelt u gekraak of hoort u klikken of een ander vreemd geluid wanneer u de voet/enkel beweegt?       | <input type="radio"/> Nooit <input type="radio"/> Zelden <input type="radio"/> Soms <input type="radio"/> Vaak <input type="radio"/> Altijd                |
| 10.3                                                                                                                                                                                                                                                                                                                                                                                                                                                                                                                                                                                       | Hapert uw enkel of blokkeert uw enkel ('op slot' gaan zitten) wanneer u deze beweegt?                | <input type="radio"/> Nooit <input type="radio"/> Zelden <input type="radio"/> Soms <input type="radio"/> Vaak <input type="radio"/> Altijd                |
| 10.4                                                                                                                                                                                                                                                                                                                                                                                                                                                                                                                                                                                       | Kunt u de voet/enkel volledig strekken?                                                              | <input type="radio"/> Altijd <input type="radio"/> Vaak <input type="radio"/> Soms <input type="radio"/> Zelden <input type="radio"/> Nooit                |
| 10.5                                                                                                                                                                                                                                                                                                                                                                                                                                                                                                                                                                                       | Kunt u de voet volledig naar u toe buigen?                                                           | <input type="radio"/> Altijd <input type="radio"/> Vaak <input type="radio"/> Soms <input type="radio"/> Zelden <input type="radio"/> Nooit                |
| 10.6                                                                                                                                                                                                                                                                                                                                                                                                                                                                                                                                                                                       | In welke mate heeft u een stijf gevoel in de voet/enkel 's ochtends bij het wakker worden?           | <input type="radio"/> Niet Ernstig <input type="radio"/> Mild <input type="radio"/> Matig <input type="radio"/> Zeer ernstig                               |
| 10.7                                                                                                                                                                                                                                                                                                                                                                                                                                                                                                                                                                                       | In welke mate heeft u een stijf gevoel in de voet/enkel na zitten, liggen of rusten later op de dag? | <input type="radio"/> Niet Ernstig <input type="radio"/> Mild <input type="radio"/> Matig <input type="radio"/> Zeer ernstig                               |
| 10.8                                                                                                                                                                                                                                                                                                                                                                                                                                                                                                                                                                                       | Hoe vaak heeft u pijn in uw voet/enkel?                                                              | <input type="radio"/> Nooit <input type="radio"/> Maandelijks <input type="radio"/> Wekelijks <input type="radio"/> Dagelijks <input type="radio"/> Altijd |

- 
- 10.9 Hoeveel voet/enkel pijn heeft u gehad in de afgelopen week bij draaien als uw voet/enkel op de grond staat?
- Geen  
 Mild  
 Matig  
 Ernstig  
 Zeer ernstig
- 
- 10.10 Hoeveel voet/enkel pijn heeft u gehad in de afgelopen week bij het volledig uitstrekken van de voet/enkel?
- Geen  
 Mild  
 Matig  
 Ernstig  
 Zeer ernstig
- 
- 10.11 Hoeveel voet/enkel pijn heeft u gehad in de afgelopen week bij het volledig naar u toe buigen/optrekken van de voet/enkel
- Geen  
 Mild  
 Matig  
 Ernstig  
 Zeer ernstig
- 
- 10.12 Hoeveel voet/enkel pijn heeft u gehad in de afgelopen week bij het lopen op een vlakke ondergrond
- Geen  
 Mild  
 Matig  
 Ernstig  
 Zeer ernstig
- 
- 10.13 Hoeveel voet/enkel pijn heeft u gehad in de afgelopen week bij het trap op- en trap af lopen?
- Geen  
 Mild  
 Matig  
 Ernstig  
 Zeer ernstig
- 
- 10.14 Hoeveel voet/enkel pijn heeft u gehad in de afgelopen week 's nachts in bed?
- Geen  
 Mild  
 Matig  
 Ernstig  
 Zeer ernstig
- 
- 10.15 Hoeveel voet/enkel pijn heeft u gehad in de afgelopen week bij het zitten of liggen?
- Geen  
 Mild  
 Matig  
 Ernstig  
 Zeer ernstig



|       |                                                                                                                        |                                    |                            |                             |                                    |                                    |
|-------|------------------------------------------------------------------------------------------------------------------------|------------------------------------|----------------------------|-----------------------------|------------------------------------|------------------------------------|
| 10.16 | Hoeveel voet/enkel pijn heeft u gehad in de afgelopen week bij het rechtop staan?                                      | <input type="radio"/> Geen         | <input type="radio"/> Mild | <input type="radio"/> Matig | <input type="radio"/> Ernstig      | <input type="radio"/> Zeer ernstig |
| 10.17 | In welke mate werd u gehinderd bij het trap aflopen?                                                                   | <input type="radio"/> Niet Ernstig | <input type="radio"/> Mild | <input type="radio"/> Matig | <input type="radio"/> Zeer ernstig | <input type="radio"/>              |
| 10.18 | In welke mate werd u gehinderd bij het trap op lopen?                                                                  | <input type="radio"/> Niet Ernstig | <input type="radio"/> Mild | <input type="radio"/> Matig | <input type="radio"/> Zeer ernstig | <input type="radio"/>              |
| 10.19 | In welke mate werd u gehinderd als u vanuit een zittende positie ging staan?                                           | <input type="radio"/> Niet Ernstig | <input type="radio"/> Mild | <input type="radio"/> Matig | <input type="radio"/> Zeer ernstig | <input type="radio"/>              |
| 10.20 | In welke mate werd u gehinderd bij het staan?                                                                          | <input type="radio"/> Niet Ernstig | <input type="radio"/> Mild | <input type="radio"/> Matig | <input type="radio"/> Zeer ernstig | <input type="radio"/>              |
| 10.21 | In welke mate werd u gehinderd bij het naar de grond buigen/iets oprapen?                                              | <input type="radio"/> Niet Ernstig | <input type="radio"/> Mild | <input type="radio"/> Matig | <input type="radio"/> Zeer ernstig | <input type="radio"/>              |
| 10.22 | In welke mate werd u gehinderd bij het lopen op een vlakke ondergrond?                                                 | <input type="radio"/> Niet Ernstig | <input type="radio"/> Mild | <input type="radio"/> Matig | <input type="radio"/> Zeer ernstig | <input type="radio"/>              |
| 10.23 | In welke mate werd u gehinderd bij het in- en uit de auto stappen?                                                     | <input type="radio"/> Niet Ernstig | <input type="radio"/> Mild | <input type="radio"/> Matig | <input type="radio"/> Zeer ernstig | <input type="radio"/>              |
| 10.24 | In welke mate werd u gehinderd bij het boodschappen doen?                                                              | <input type="radio"/> Niet Ernstig | <input type="radio"/> Mild | <input type="radio"/> Matig | <input type="radio"/> Zeer ernstig | <input type="radio"/>              |
| 10.25 | In welke mate werd u gehinderd bij sokken/panty's aantrekken?                                                          | <input type="radio"/> Niet Ernstig | <input type="radio"/> Mild | <input type="radio"/> Matig | <input type="radio"/> Zeer ernstig | <input type="radio"/>              |
| 10.26 | In welke mate werd u gehinderd bij het opstaan uit bed?                                                                | <input type="radio"/> Niet Ernstig | <input type="radio"/> Mild | <input type="radio"/> Matig | <input type="radio"/> Zeer ernstig | <input type="radio"/>              |
| 10.27 | In welke mate werd u gehinderd bij het sokken uittrekken?                                                              | <input type="radio"/> Niet Ernstig | <input type="radio"/> Mild | <input type="radio"/> Matig | <input type="radio"/> Zeer ernstig | <input type="radio"/>              |
| 10.28 | In welke mate werd u gehinderd bij het in bed liggen (omdraaien, lange tijd uw voet/enkel in dezelfde positie houden)? | <input type="radio"/> Niet Ernstig | <input type="radio"/> Mild | <input type="radio"/> Matig | <input type="radio"/> Zeer ernstig | <input type="radio"/>              |

|       |                                                                                                                  |                                                                                                                                                                    |
|-------|------------------------------------------------------------------------------------------------------------------|--------------------------------------------------------------------------------------------------------------------------------------------------------------------|
| 10.29 | In welke mate werd u gehinderd bij het in/uit bad stappen?                                                       | <input type="radio"/> Niet<br>Ernstig <input type="radio"/> Mild<br><input type="radio"/> Matig<br><input type="radio"/> Zeer ernstig                              |
| 10.30 | In welke mate werd u gehinderd bij zitten?                                                                       | <input type="radio"/> Niet<br>Ernstig <input type="radio"/> Mild<br><input type="radio"/> Matig<br><input type="radio"/> Zeer ernstig                              |
| 10.31 | In welke mate werd u gehinderd bij het toilet op en af gaan?                                                     | <input type="radio"/> Niet<br>Ernstig <input type="radio"/> Mild<br><input type="radio"/> Matig<br><input type="radio"/> Zeer ernstig                              |
| 10.32 | In welke mate werd u gehinderd bij zwaar huishoudelijk werk (bijvoorbeeld zware dozen sjouwen, vloer schrobben)? | <input type="radio"/> Niet<br>Ernstig <input type="radio"/> Mild<br><input type="radio"/> Matig<br><input type="radio"/> Zeer ernstig                              |
| 10.33 | In welke mate werd u gehinderd bij licht huishoudelijk werk (bijvoorbeeld koken, afstoffen)?                     | <input type="radio"/> Niet<br>Ernstig <input type="radio"/> Mild<br><input type="radio"/> Matig<br><input type="radio"/> Zeer ernstig                              |
| 10.34 | In welke mate werd u gehinderd bij hurken?                                                                       | <input type="radio"/> Niet<br>Ernstig <input type="radio"/> Mild<br><input type="radio"/> Matig<br><input type="radio"/> Zeer ernstig                              |
| 10.35 | In welke mate werd u gehinderd bij hardlopen?                                                                    | <input type="radio"/> Niet<br>Ernstig <input type="radio"/> Mild<br><input type="radio"/> Matig<br><input type="radio"/> Zeer ernstig                              |
| 10.36 | In welke mate werd u gehinderd bij springen?                                                                     | <input type="radio"/> Niet<br>Ernstig <input type="radio"/> Mild<br><input type="radio"/> Matig<br><input type="radio"/> Zeer ernstig                              |
| 10.37 | In welke mate werd u gehinderd bij rondraaien op uw aangedane voet/enkel?                                        | <input type="radio"/> Niet<br>Ernstig <input type="radio"/> Mild<br><input type="radio"/> Matig<br><input type="radio"/> Zeer ernstig                              |
| 10.38 | In welke mate werd u gehinderd bij knielen?                                                                      | <input type="radio"/> Niet<br>Ernstig <input type="radio"/> Mild<br><input type="radio"/> Matig<br><input type="radio"/> Zeer ernstig                              |
| 10.39 | Hoe vaak bent u zich bewust van uw voet/enkel probleem?                                                          | <input type="radio"/> Nooit<br>Wekelijks <input type="radio"/> Maandelijks<br><input type="radio"/> Dagelijks <input type="radio"/> Altijd                         |
| 10.40 | Heeft u uw leven veranderd om activiteiten te vermijden die schadelijk kunnen zijn voor uw voet/enkel?           | <input type="radio"/> Niet<br><input type="radio"/> Enigszins<br><input type="radio"/> Matig<br><input type="radio"/> Behoorlijk<br><input type="radio"/> Volledig |

- 
- 10.41 In hoeverre kunt u op uw voet/enkel vertrouwen?
- Volledig
  - Behoorlijk
  - Matig
  - Enigzins
  - Niet

- 
- 10.42 In het algemeen, in welke mate ondervindt u hinder van uw voet/enkel
- Geen
  - Mild
  - Matig
  - Ernstig
  - Zeer ernstig

## Vragenlijst PRIMA studie 6 weken - Dank

| Number | Question                                                                                                                                      | Answers                                                                  |
|--------|-----------------------------------------------------------------------------------------------------------------------------------------------|--------------------------------------------------------------------------|
| 11.1   | Hartelijk dank voor de tijd die u heeft genomen om de vragenlijsten in te vullen. Indien u nog opmerkingen heeft kunt u deze hierin plaatsen. | <div style="border: 1px dashed black; height: 50px; width: 100%;"></div> |
